# Supplementary material for: Understanding the Evolution of Defense Metabolites in Arabidopsis thaliana Using Genome-wide Association Mapping
Source: Oxford University Press journal article supplement (doi:10.1534/genetics.109.108522), 2009-09-09
Supplement: figures1.pdf [file figures1.pdf]

1

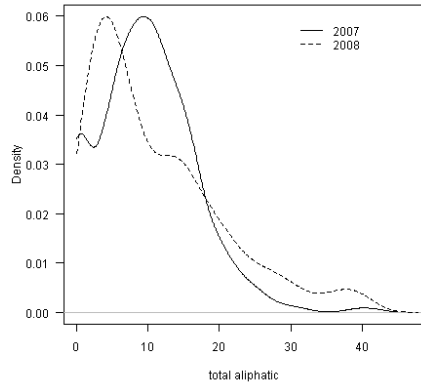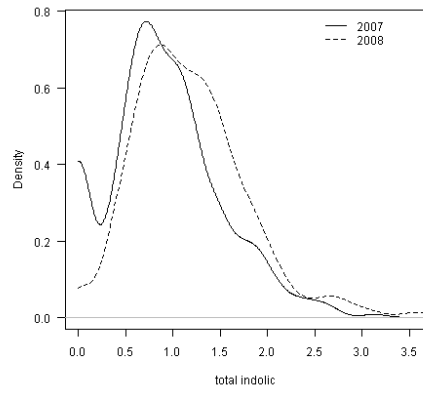

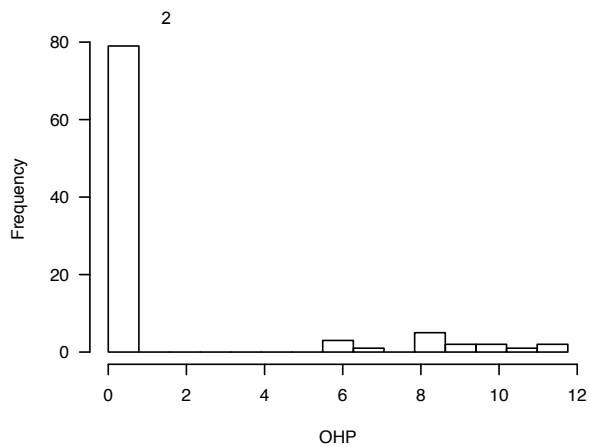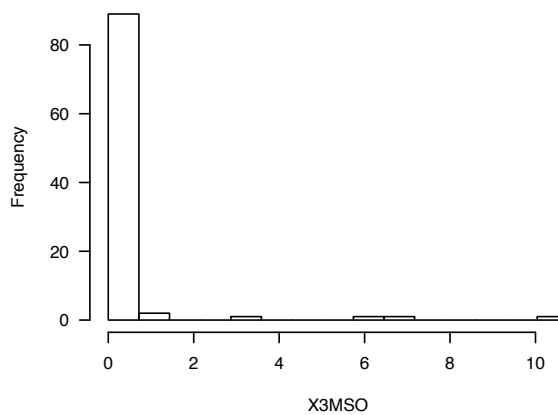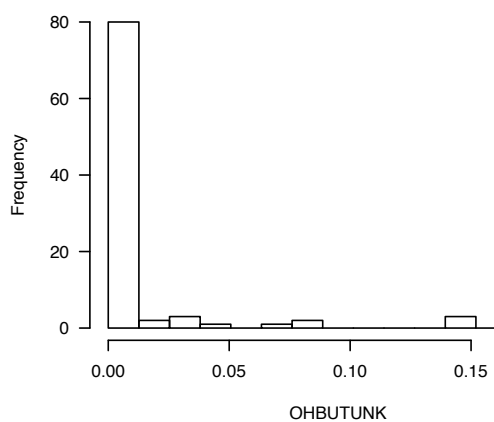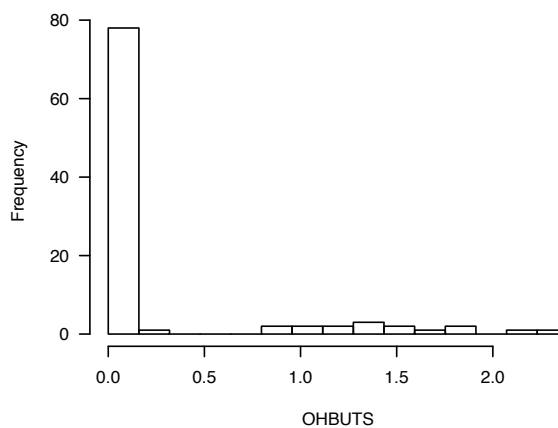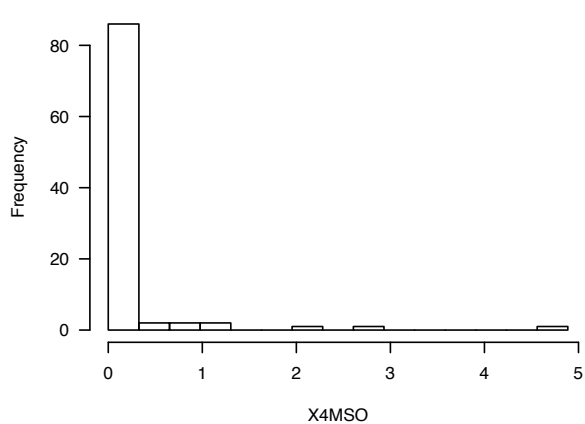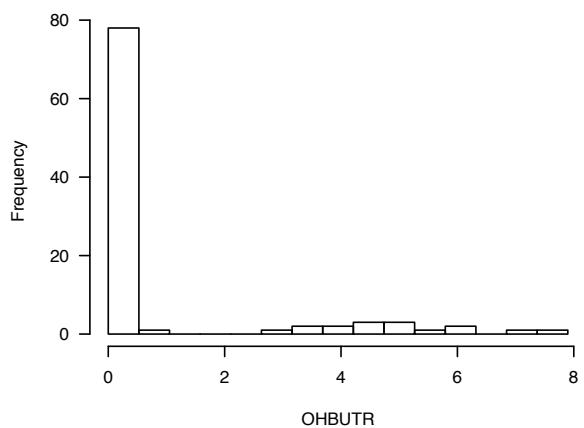

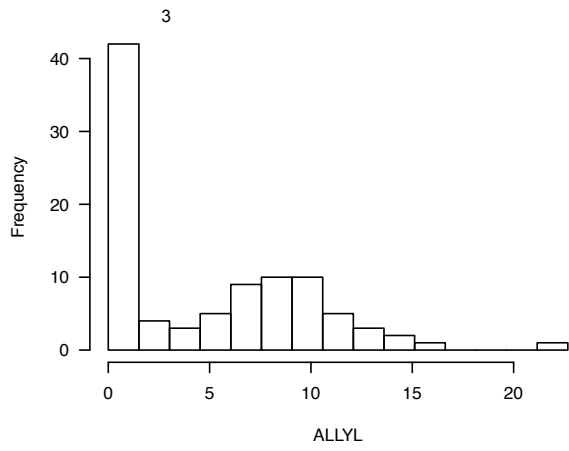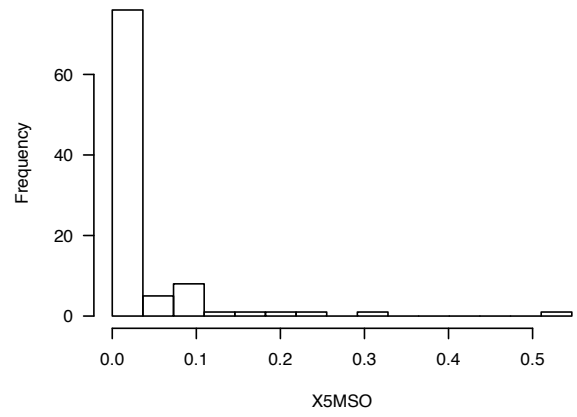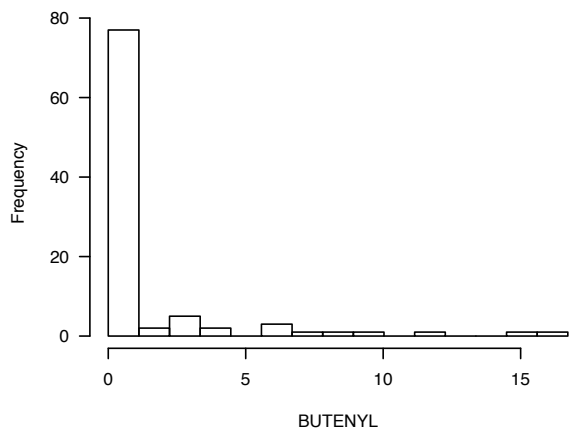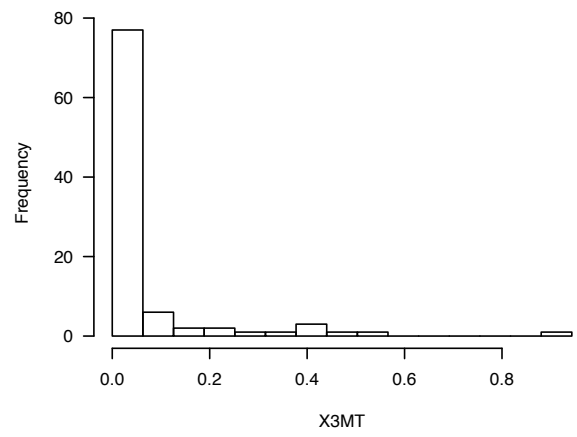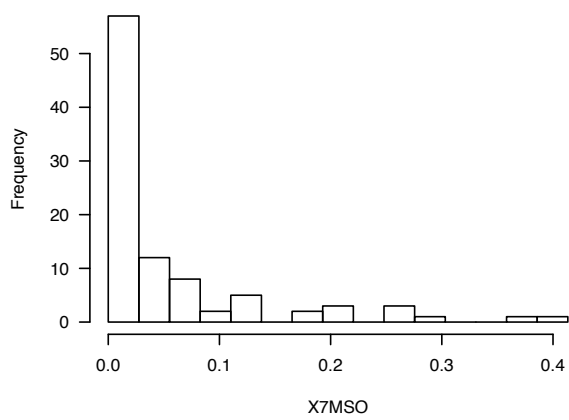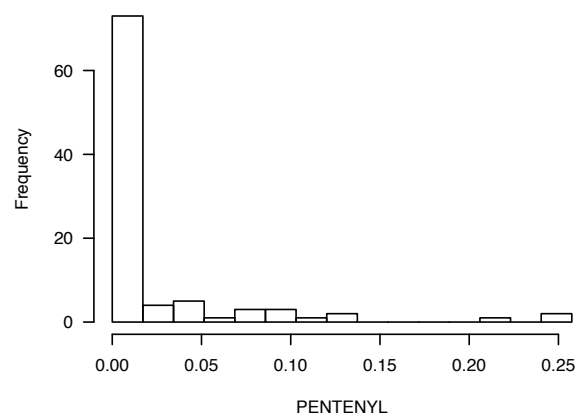

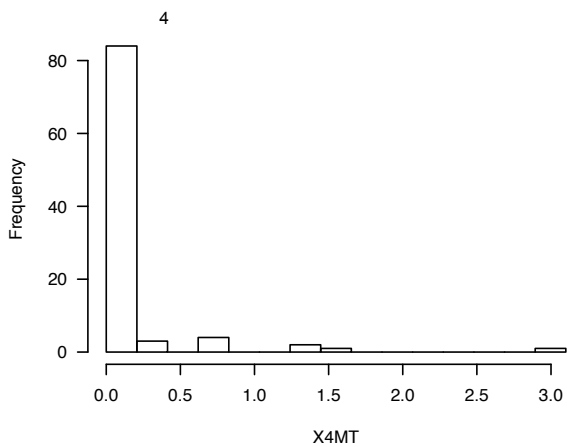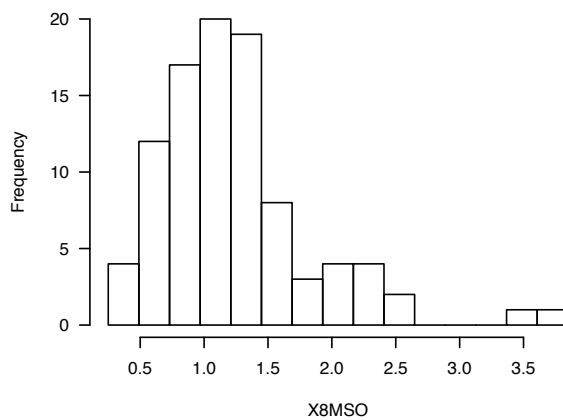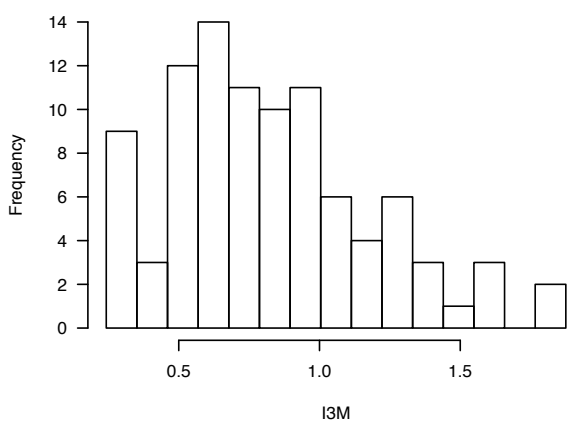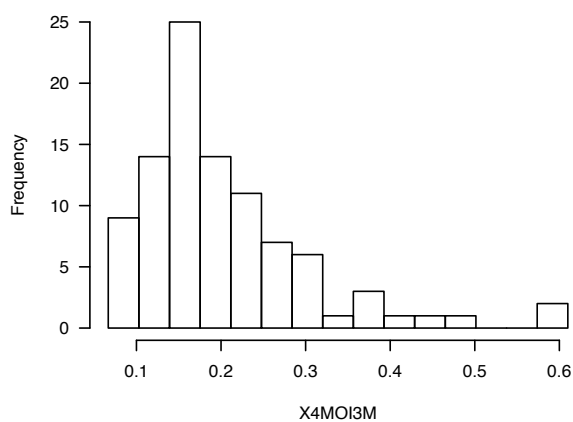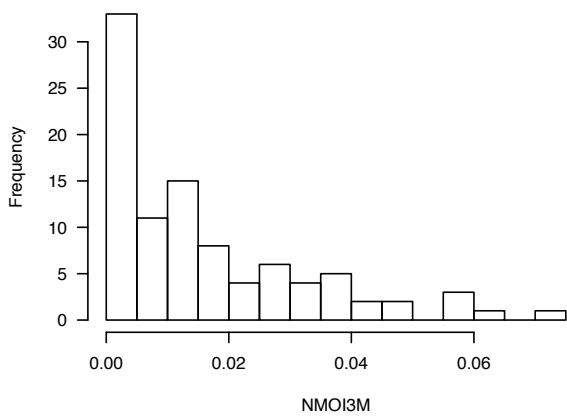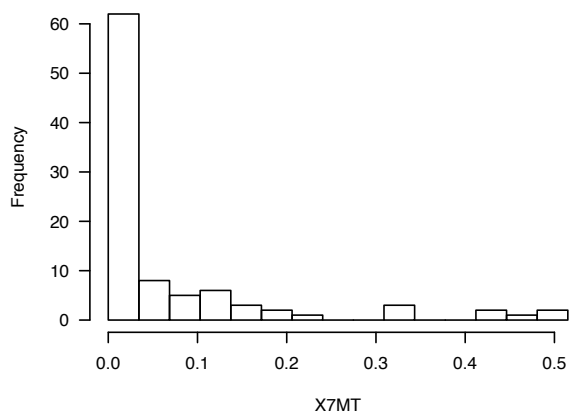

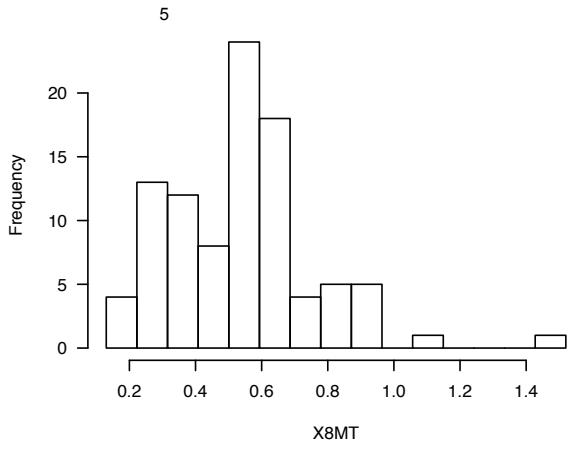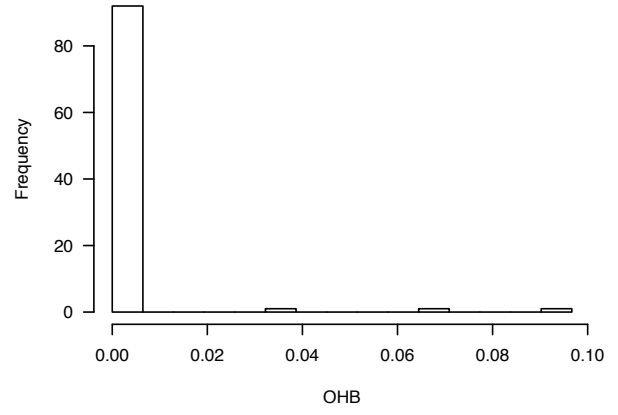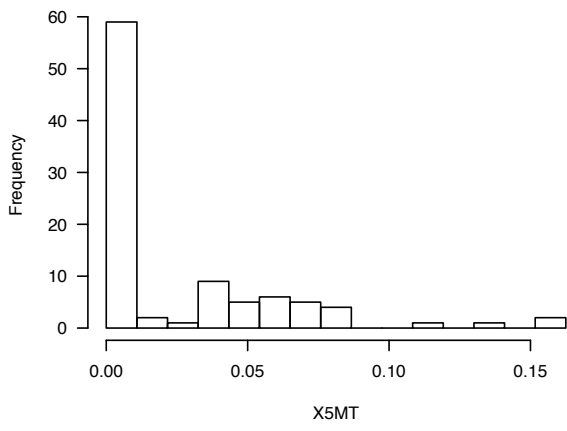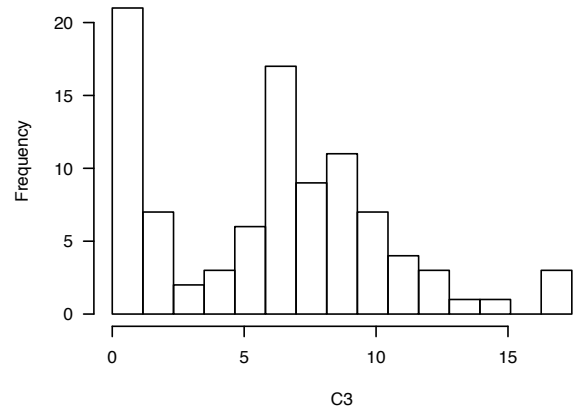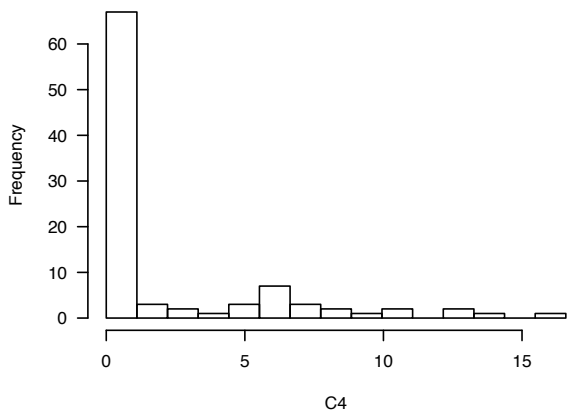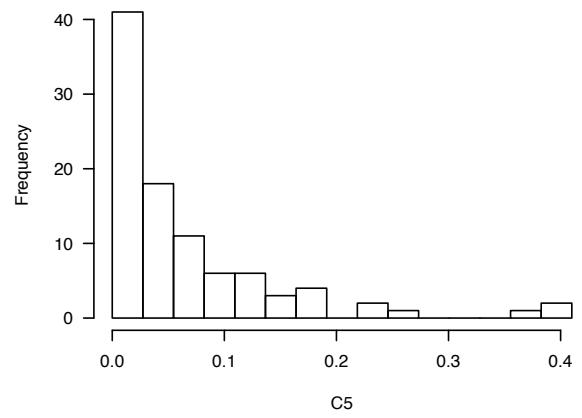

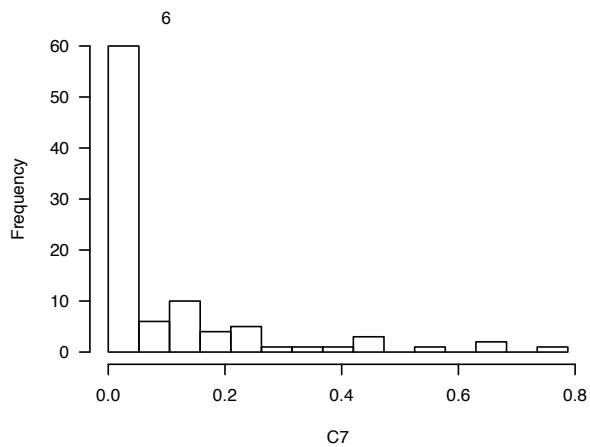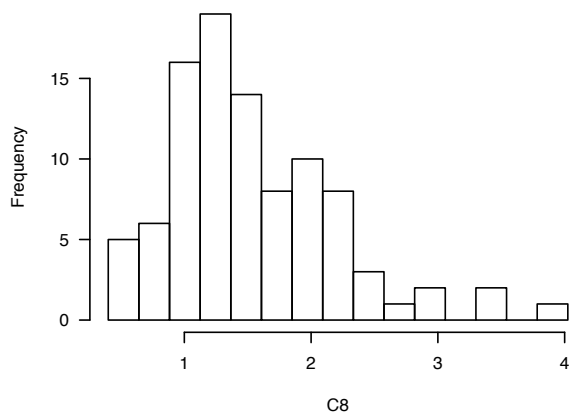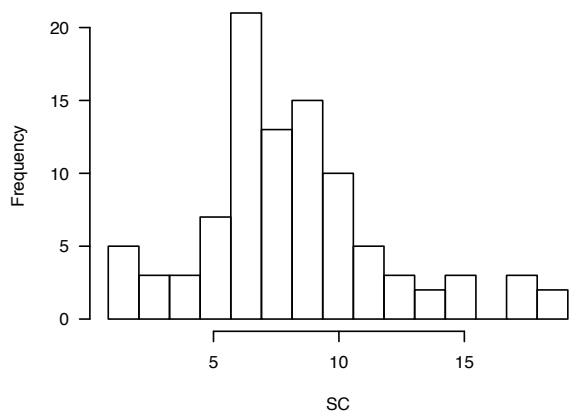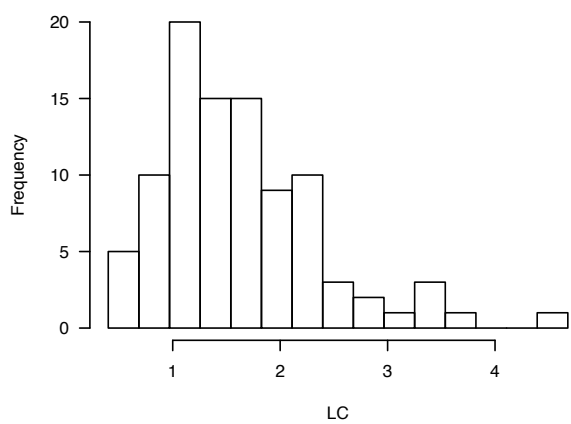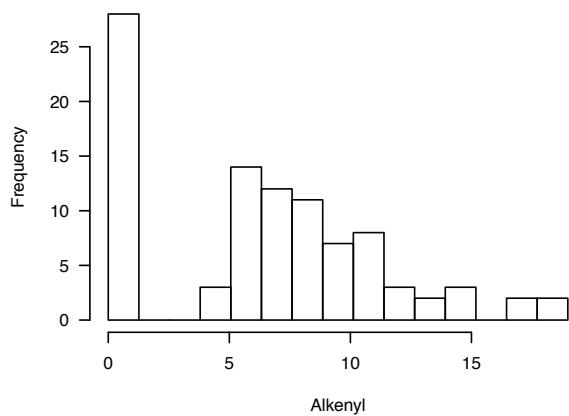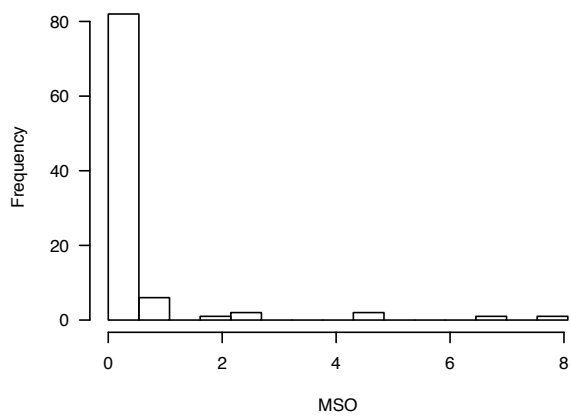

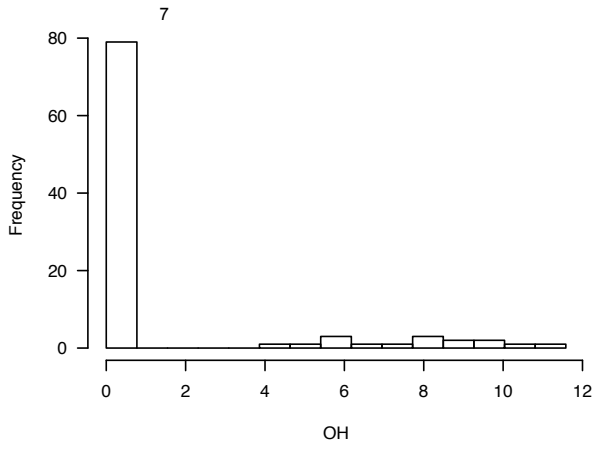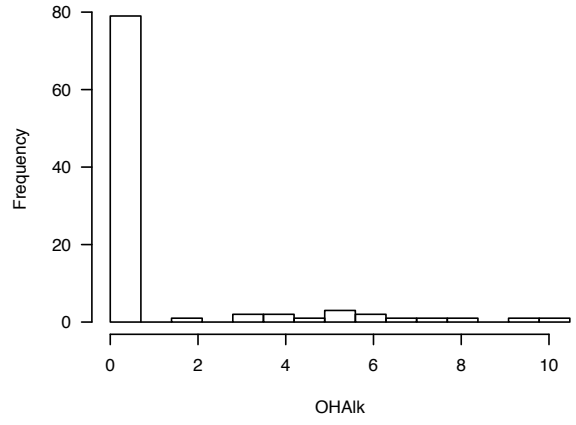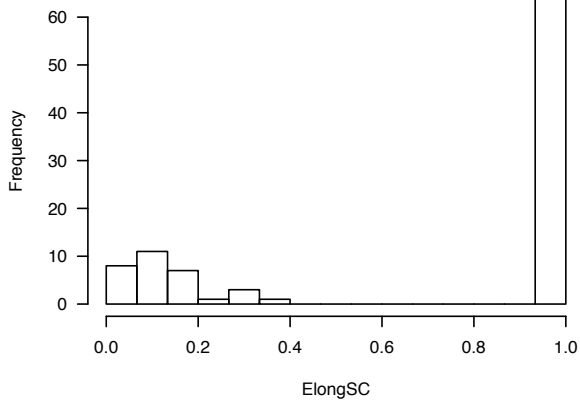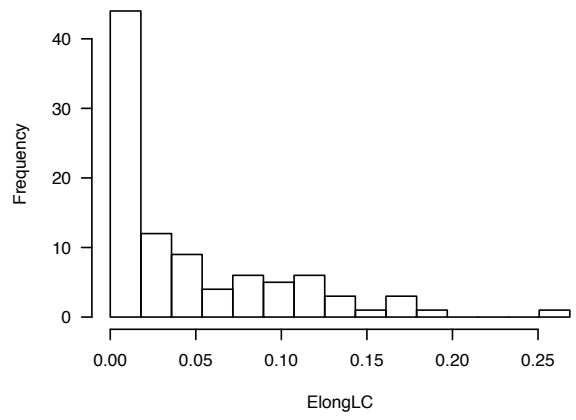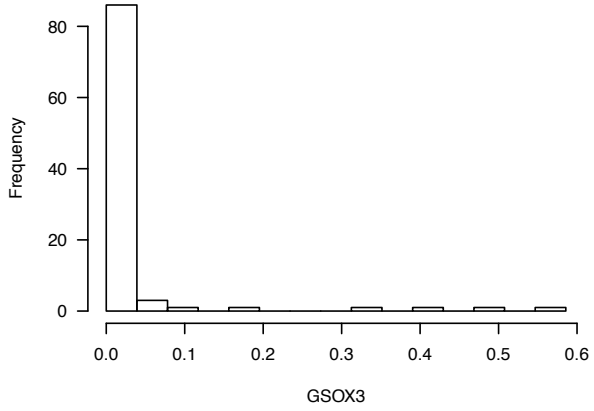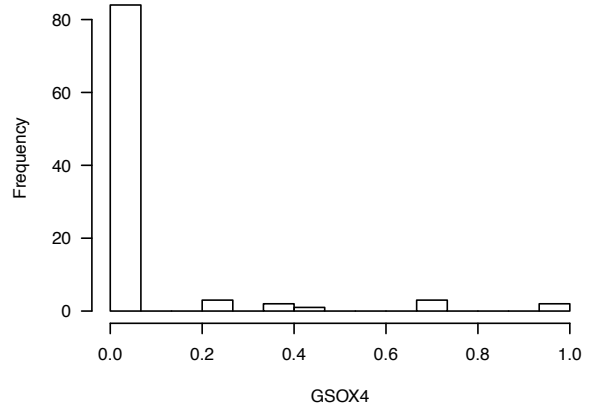

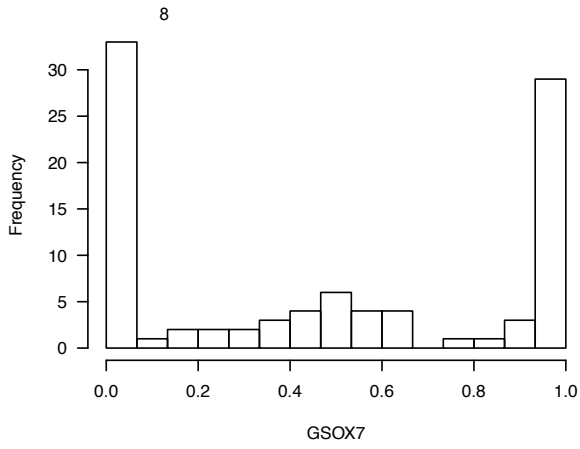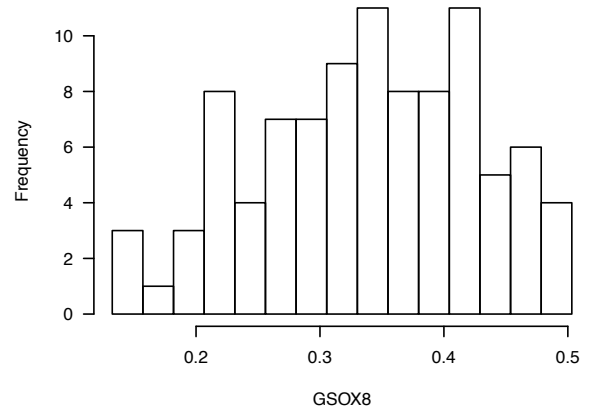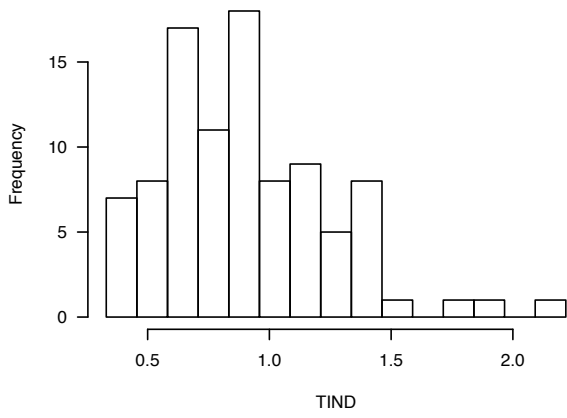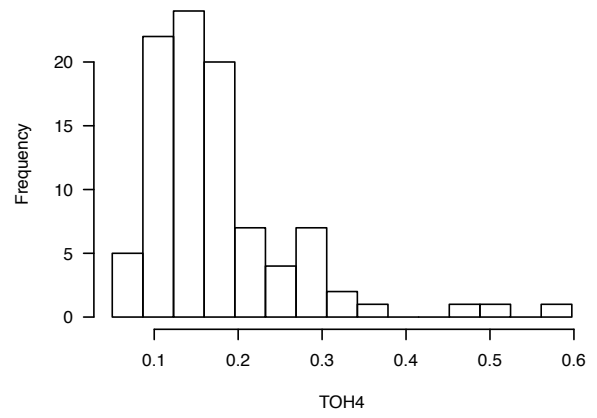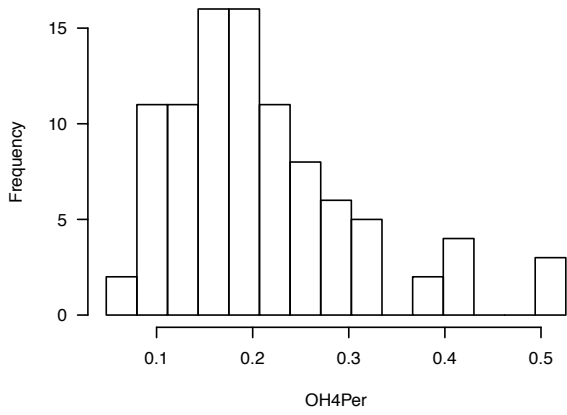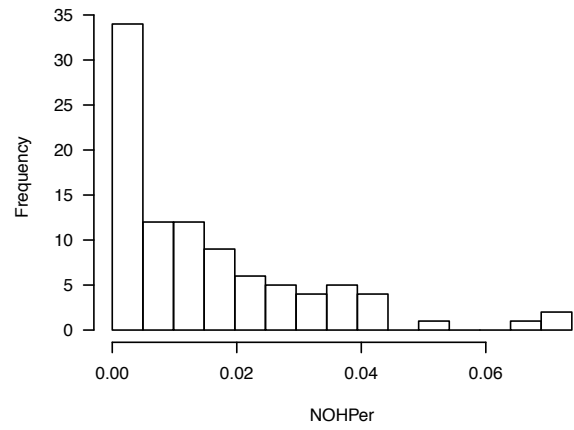



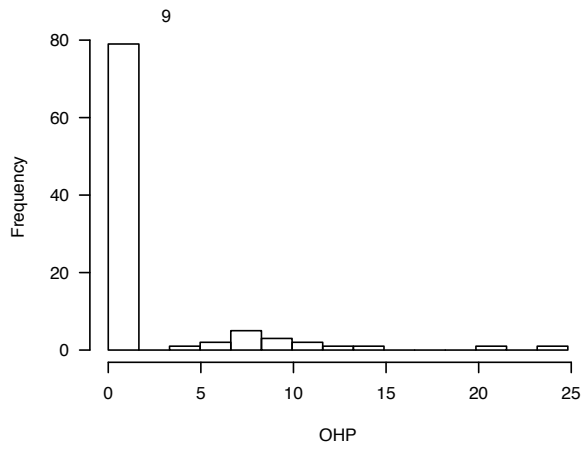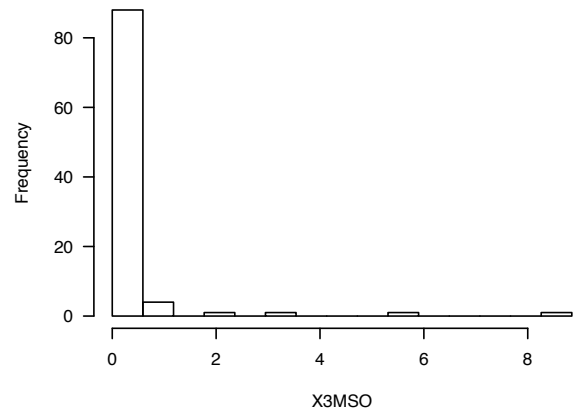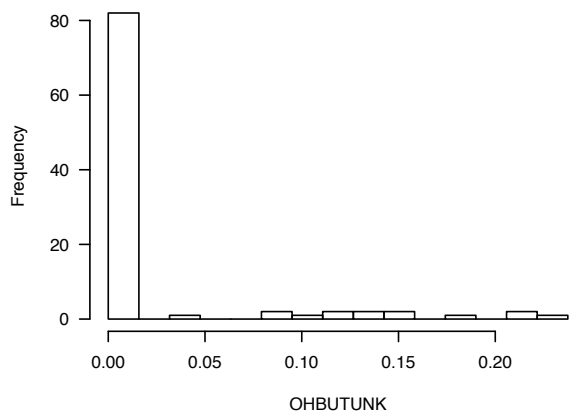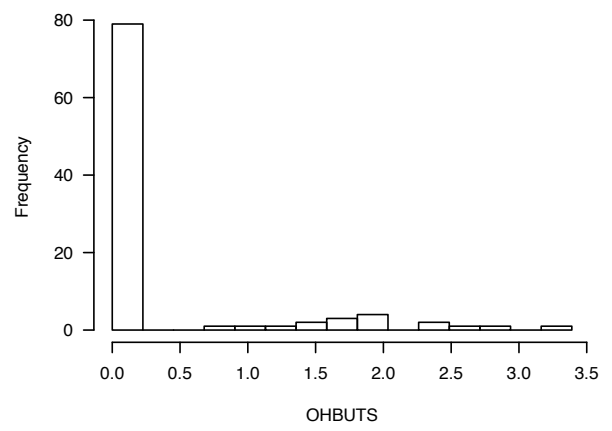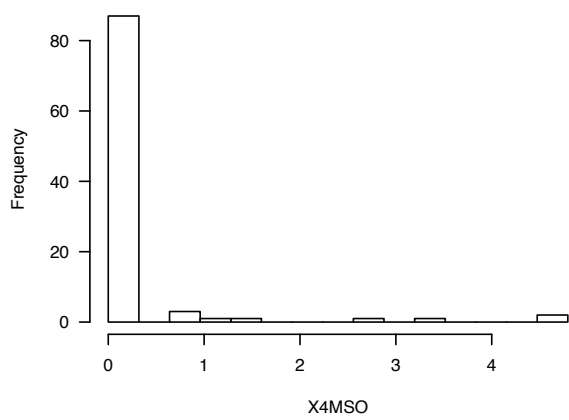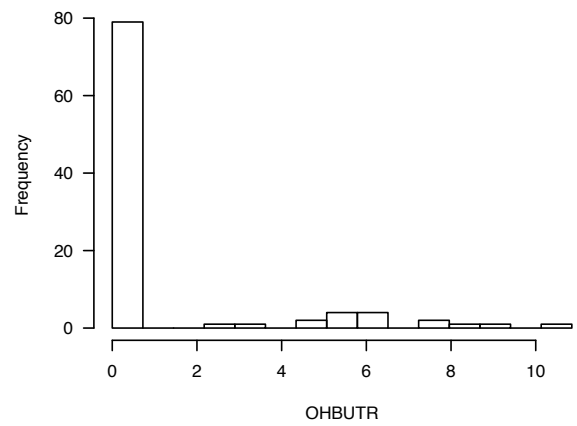

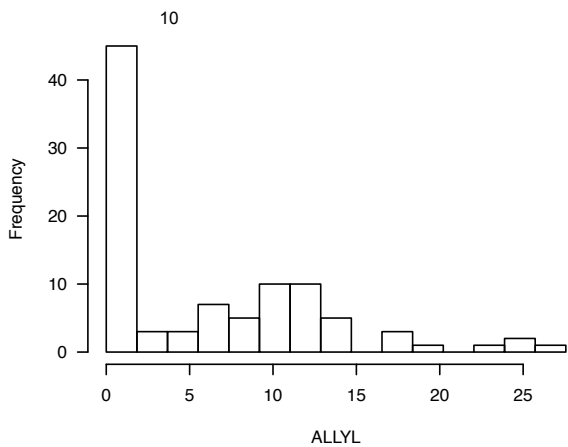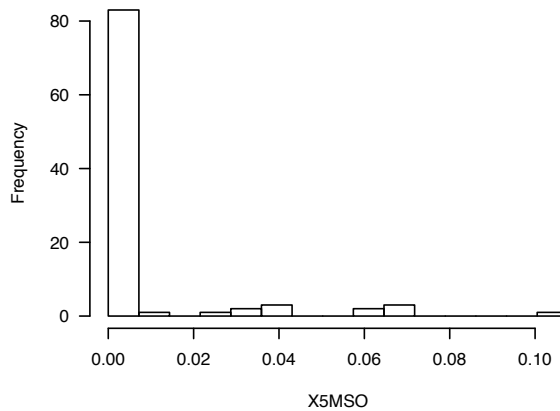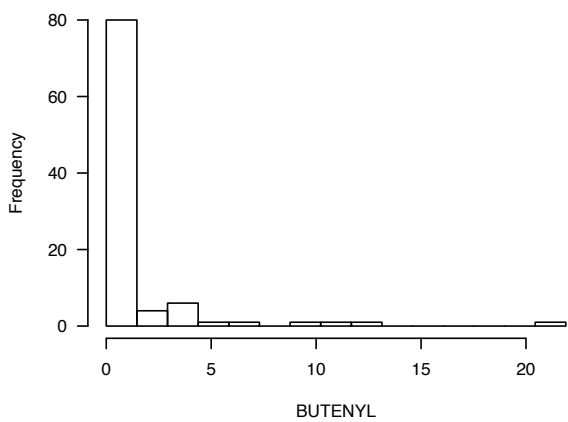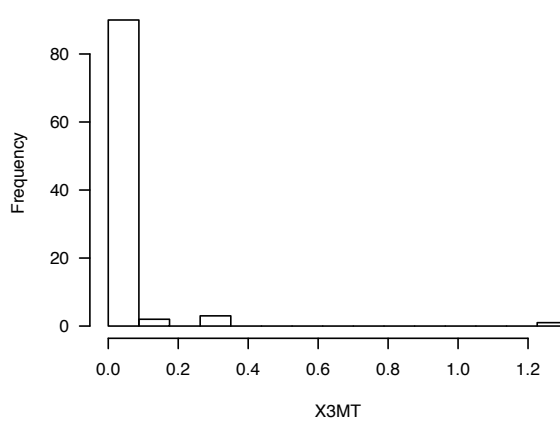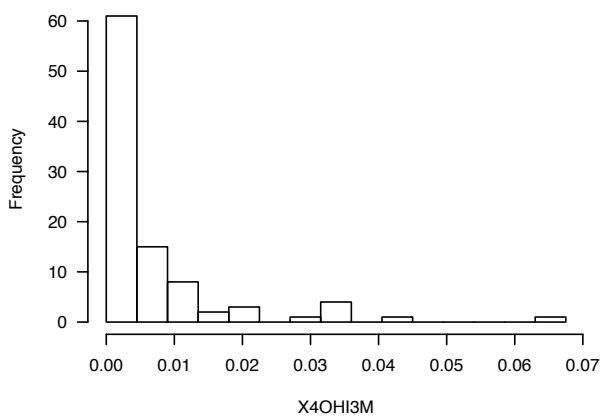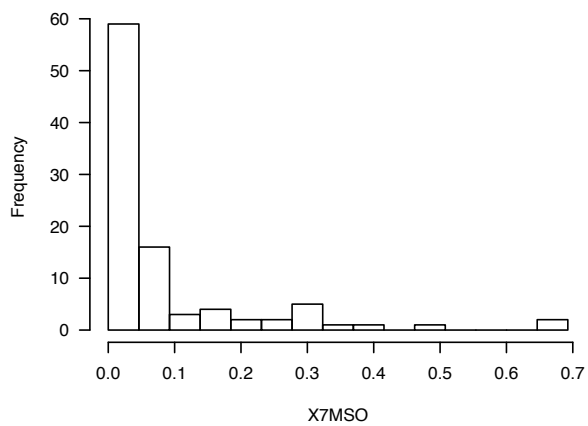

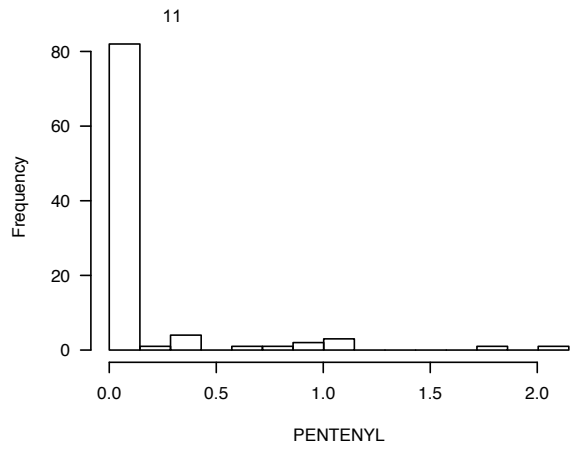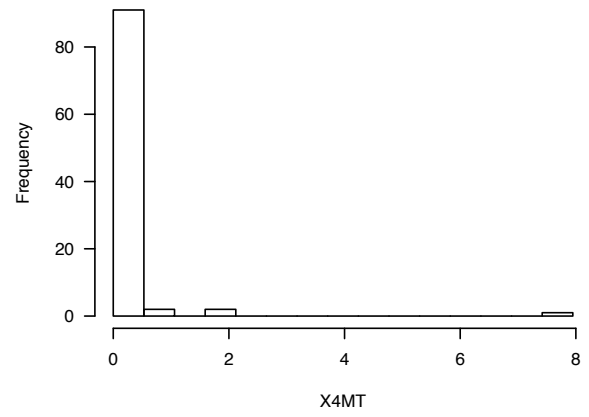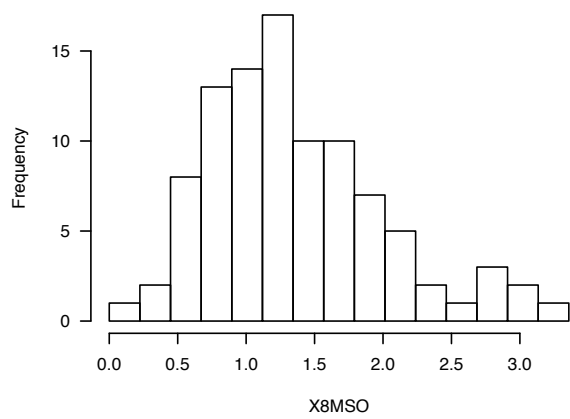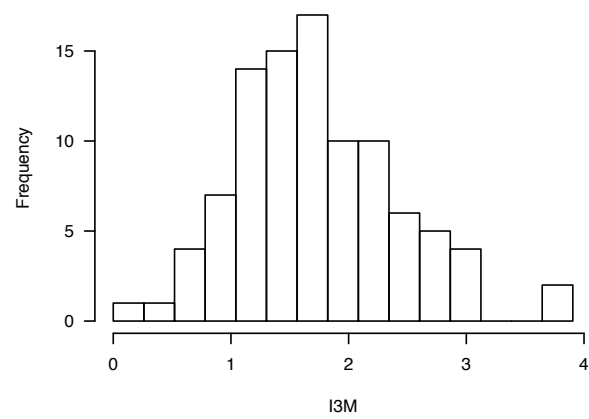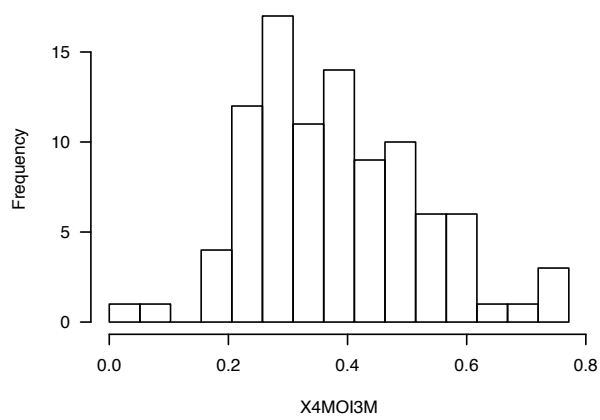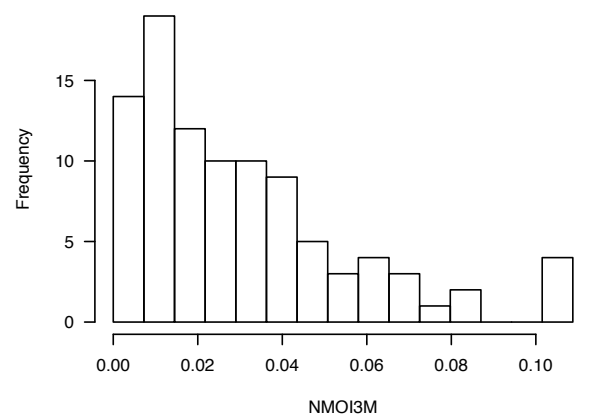

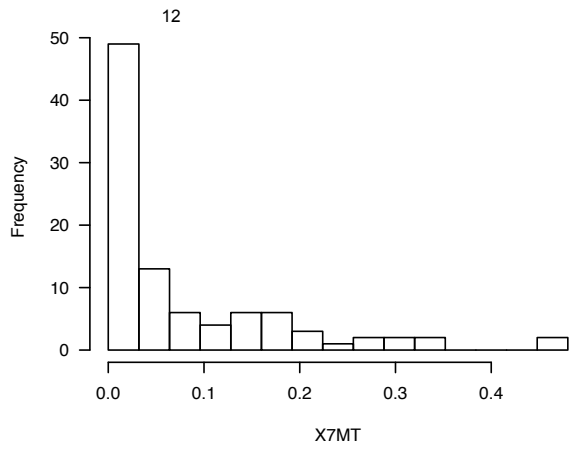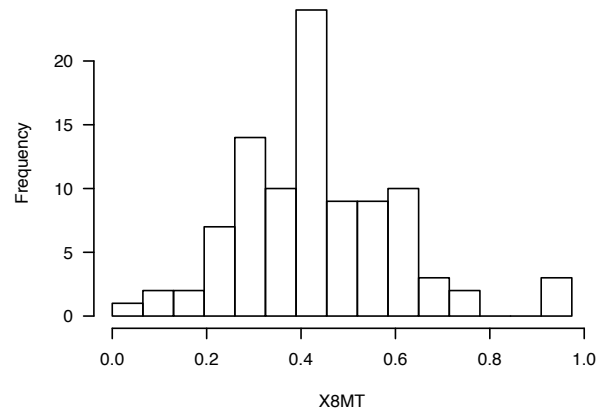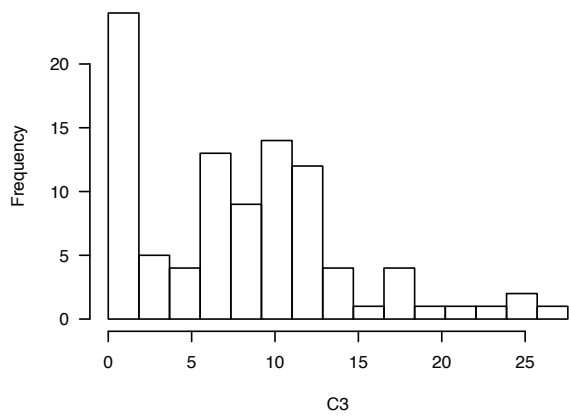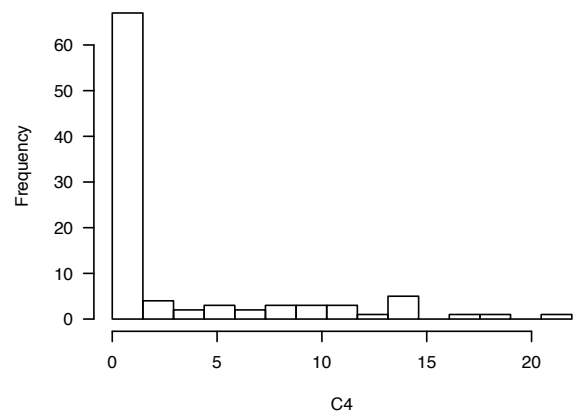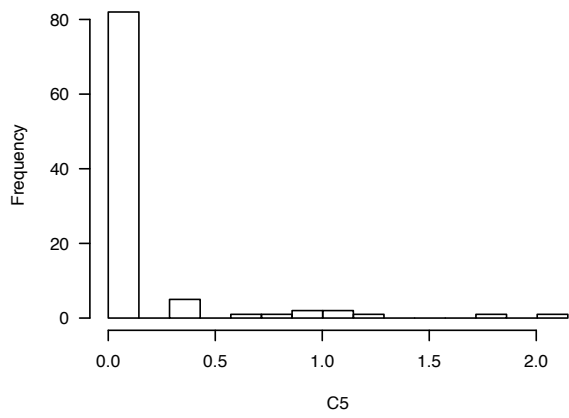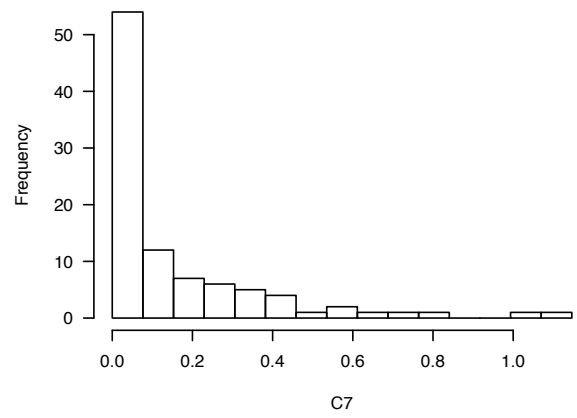

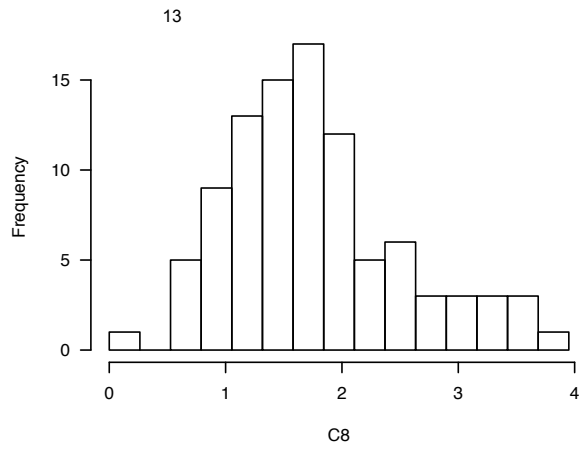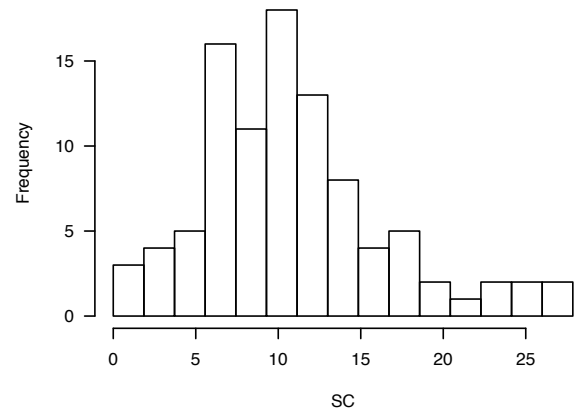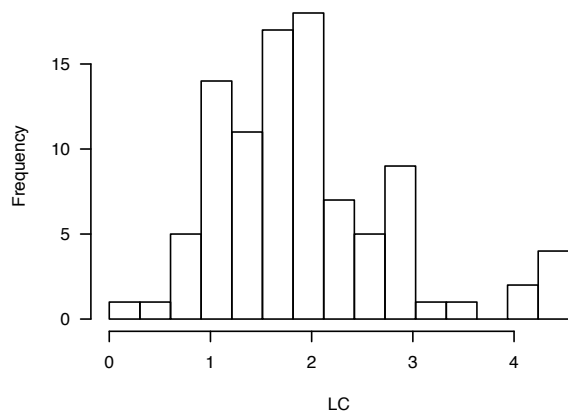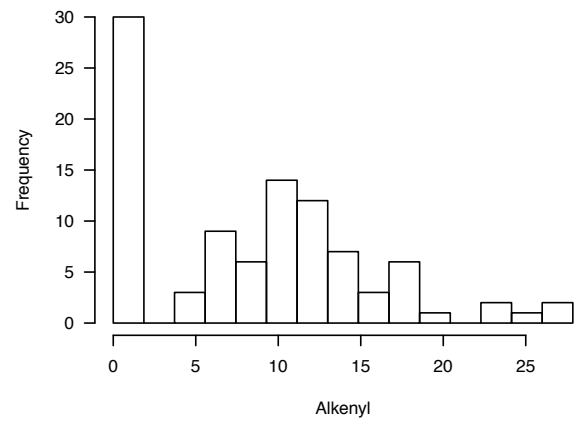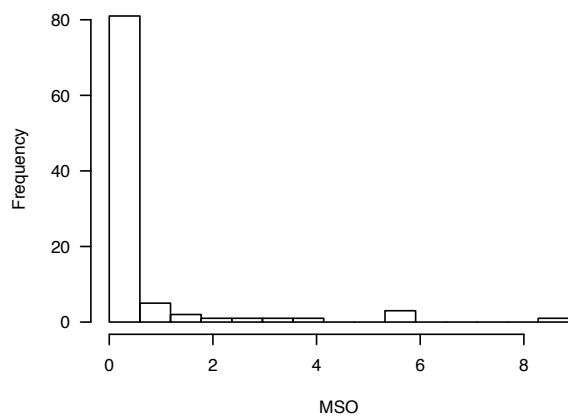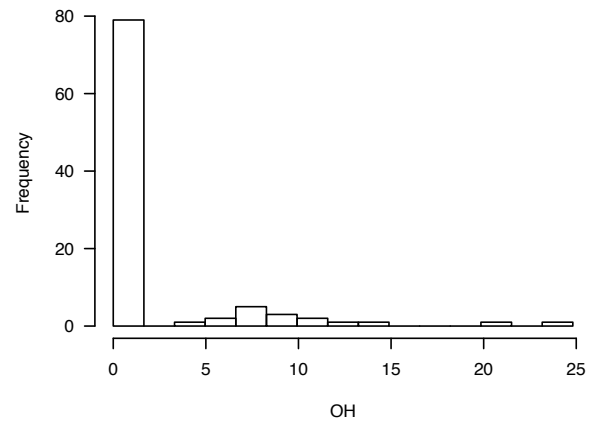

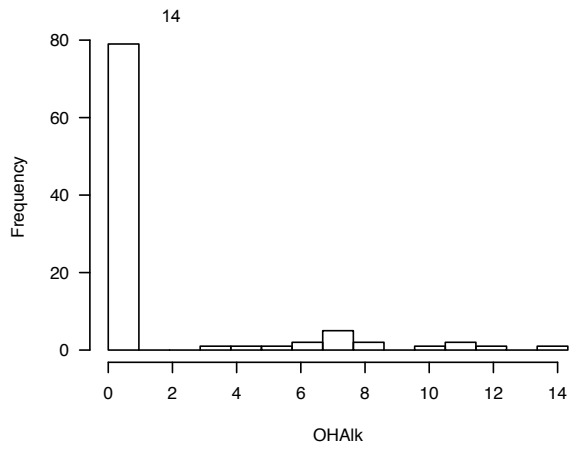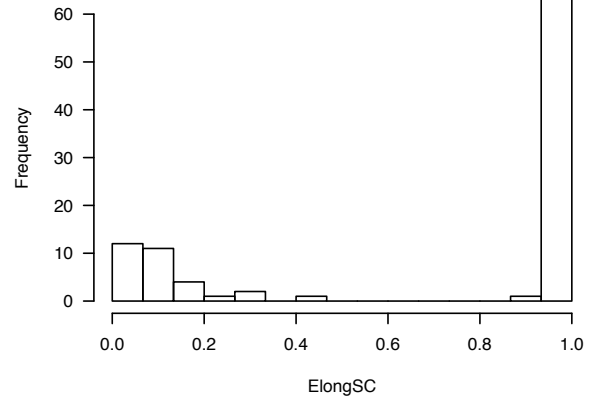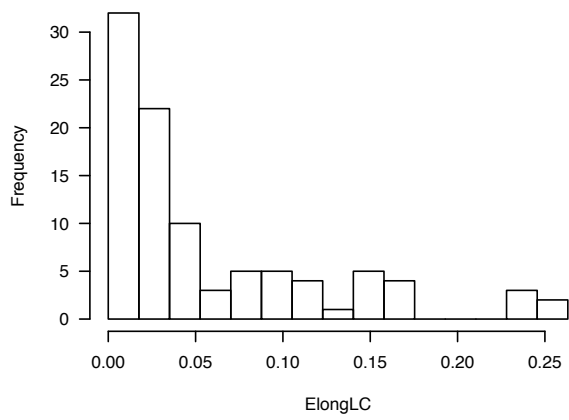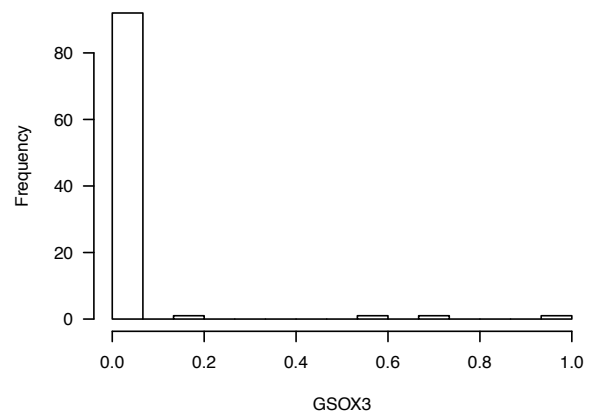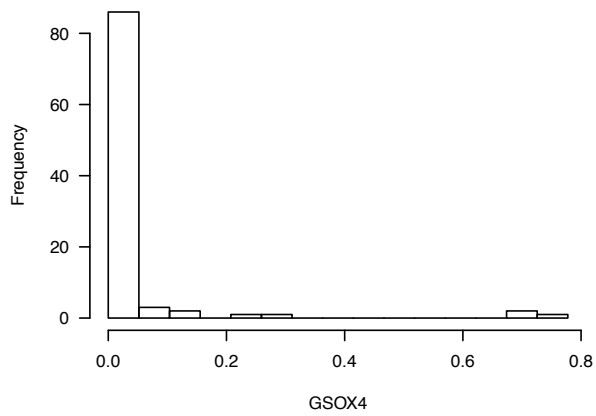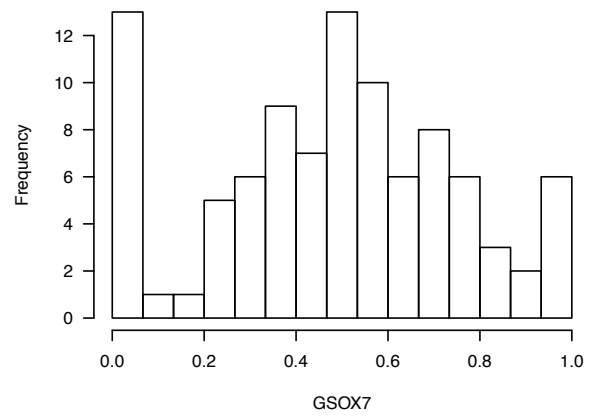

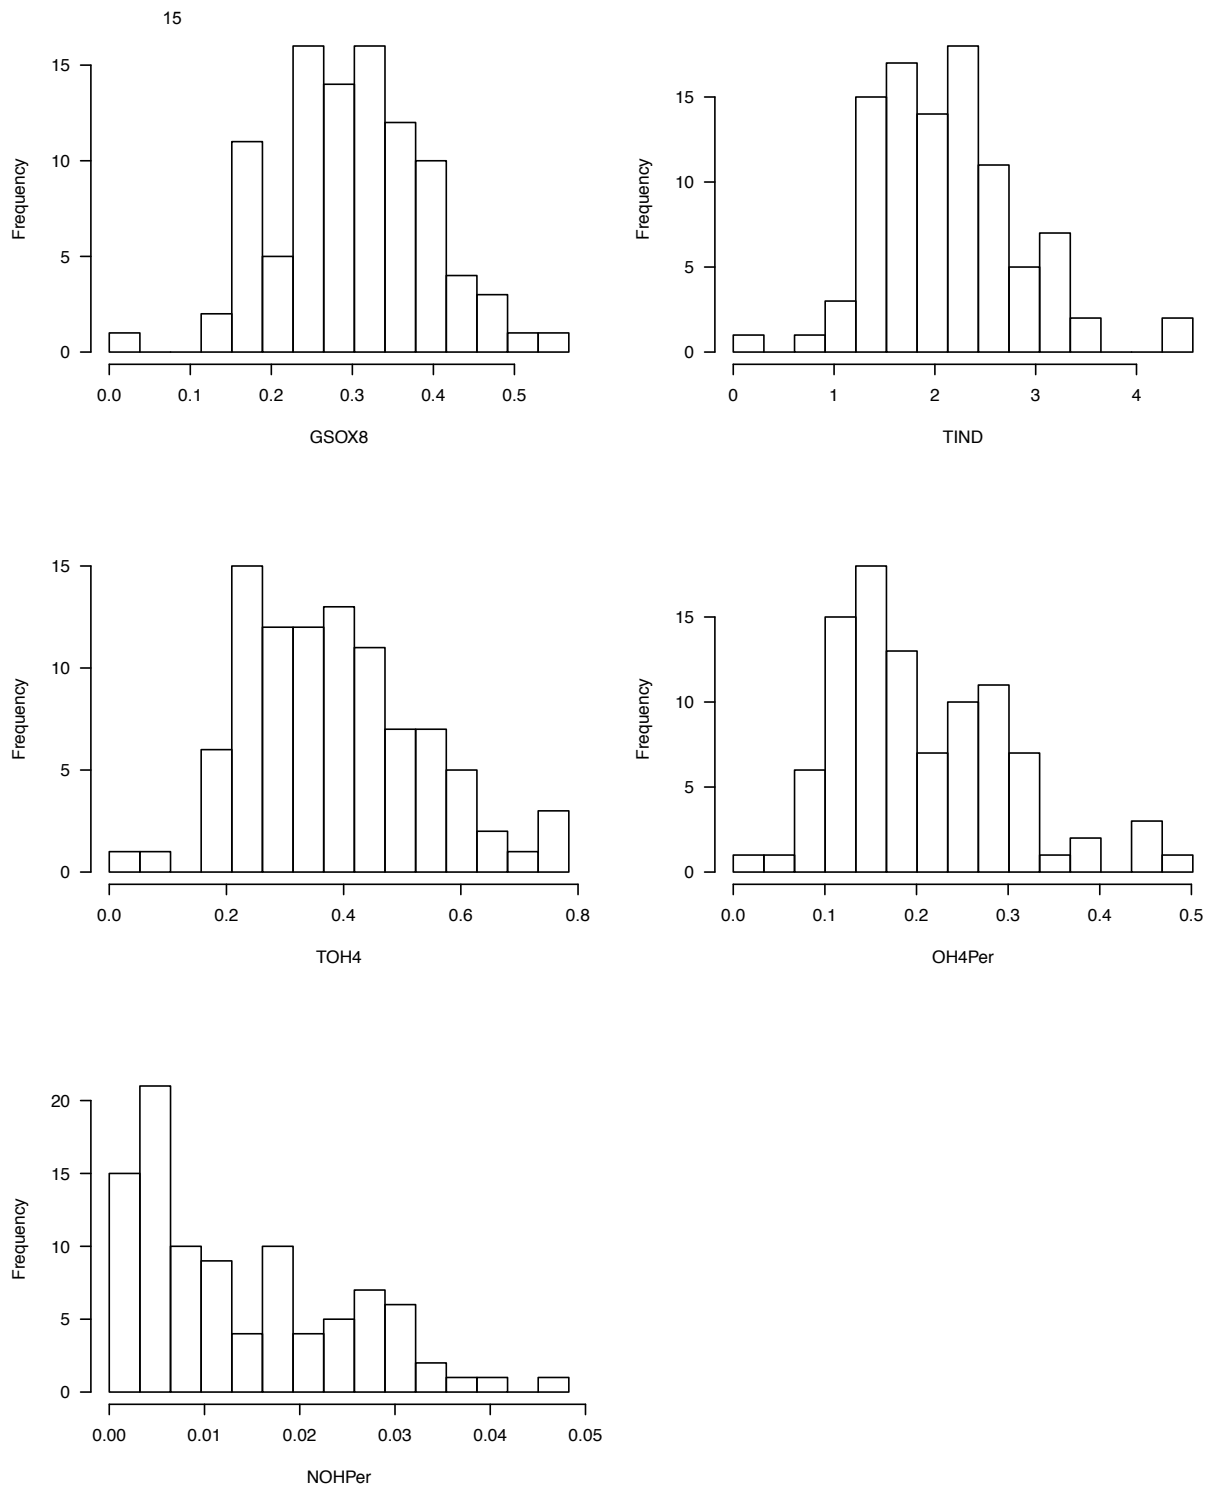

FIGURE S1.—GSL distributions in 2007 and 2008. Shown on page 1 is a direct comparison for the distribution of the total aliphatic and indolic glucosinolates for the two datasets. The graphs on the remaining pages are individual histograms for all utilized glucosinolate phenotypes within each dataset: pages 2-8 are for the 2007 dataset and 9-15 are for the 2008 dataset.
