# Supplementary material for: Understanding the Evolution of Defense Metabolites in Arabidopsis thaliana Using Genome-wide Association Mapping
Source: Oxford University Press journal article supplement (doi:10.1534/genetics.109.108522), 2009-09-09
Supplement: figures3.pdf [file figures3.pdf]

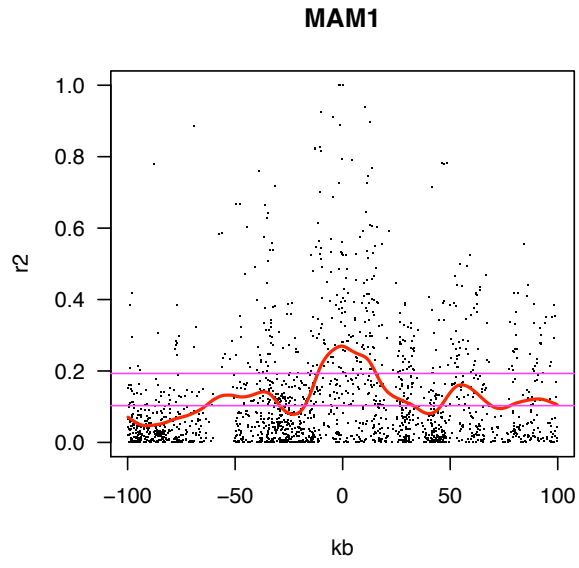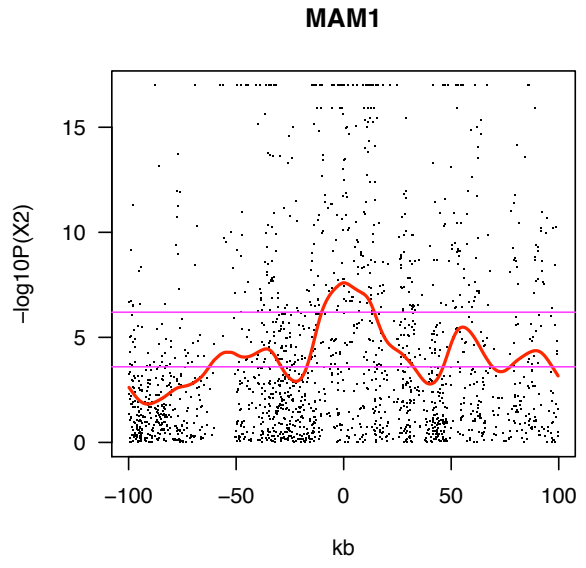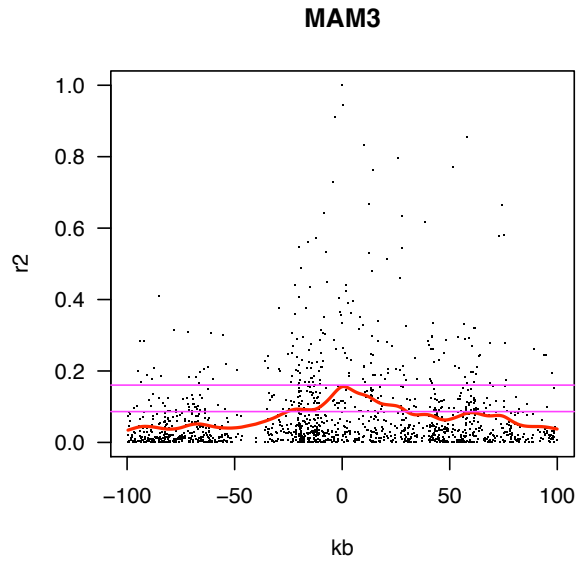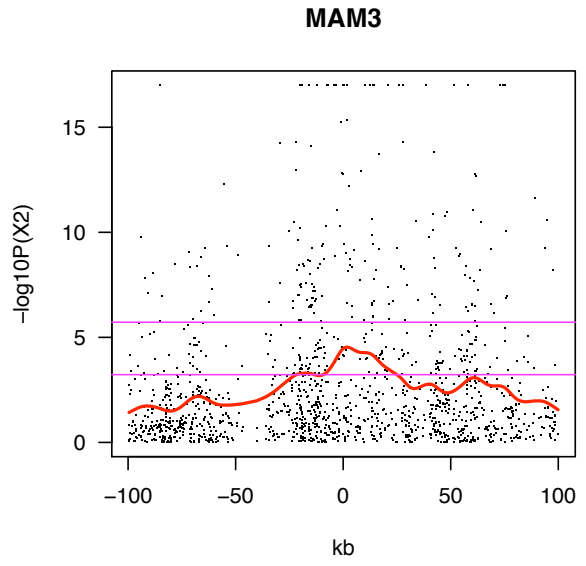

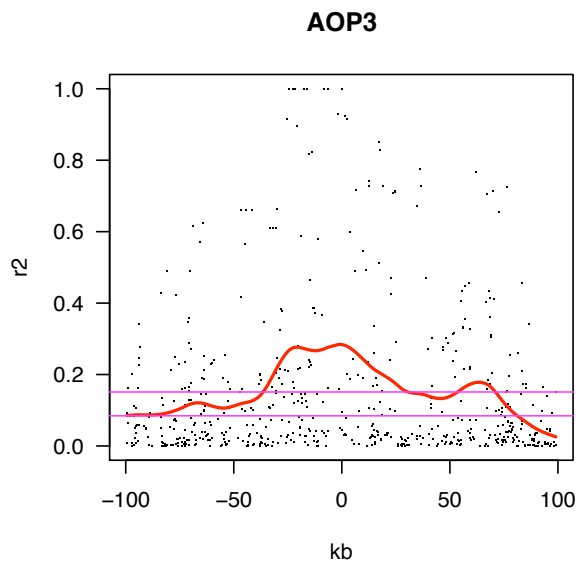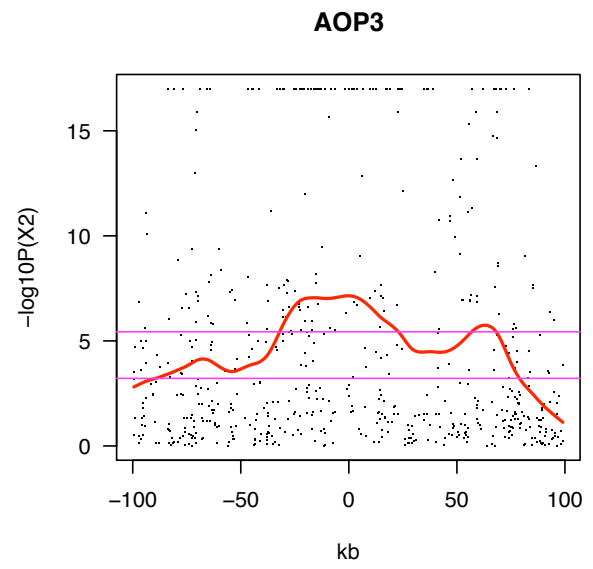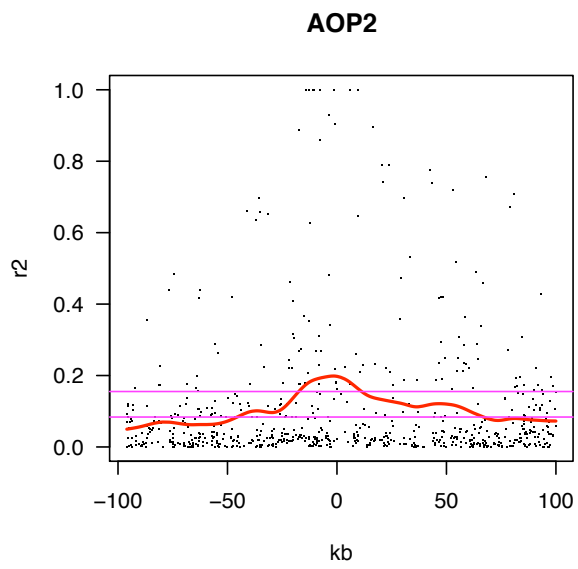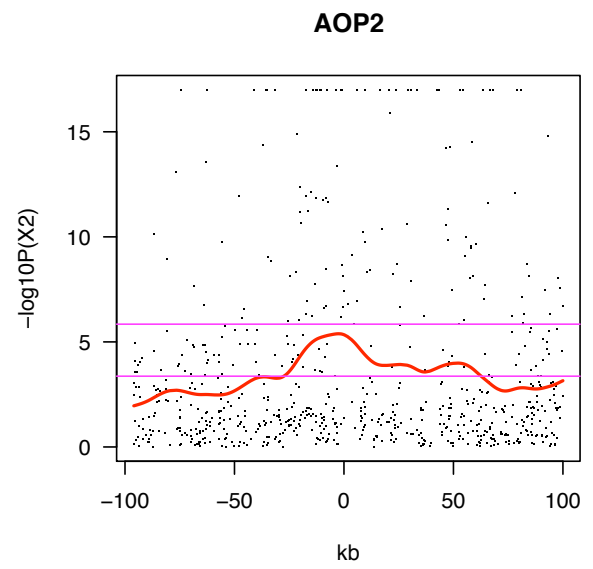

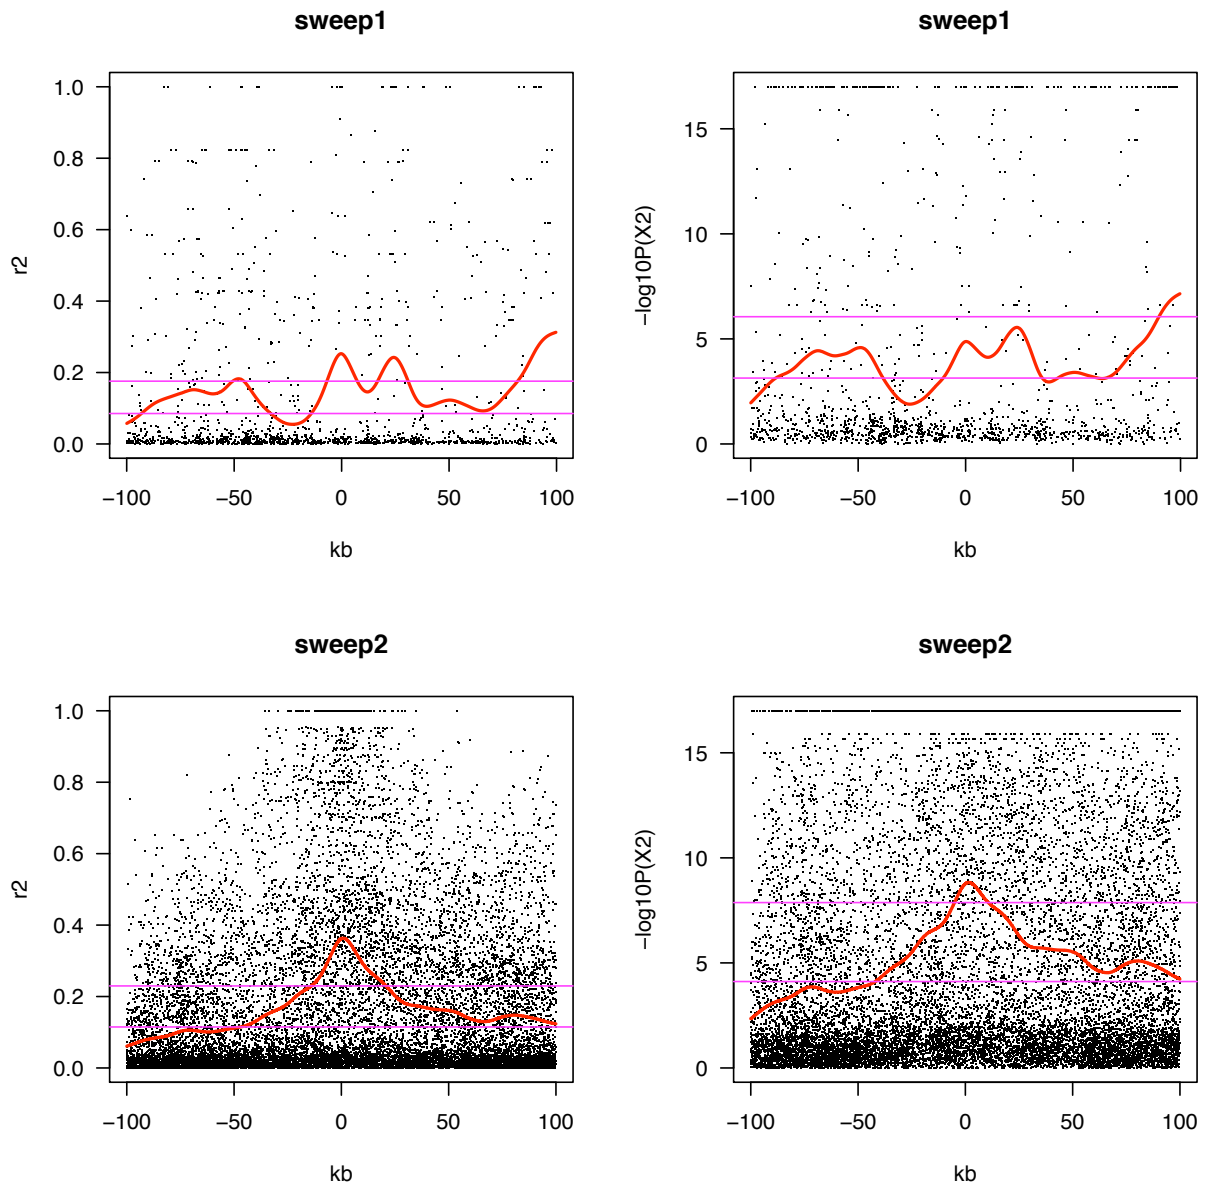

FIGURE S3.—LD decay around *MAM*, *AOP*, and recent selective sweeps. LD, as measured by  $r^2$  and  $-\log_{10}P(\chi^2)$ , between SNPs within a query gene/region and SNPs within  $\pm 100$ kb around of the query gene is plotted against the physical distance (kilobases) between each SNP-pairs. The four query genes are *MAM1*, *MAM3*, *AOP2*, and *AOP3*, and the query regions are two previously proposed recent selective sweep (CLARK *et al.* 2007). The red line shows the fitted cubic smoothing spline ( $spar=1$ ) between LD and distance. The top and bottom pink lines show the 99<sup>th</sup> and 95<sup>th</sup> percentiles of non-syntenic LD; i.e. LD between SNPs within the query gene and SNPs on chromosomes outside of the gene. The center of the graph is at the center of the query genes.
