# Supplementary material for: Understanding the Evolution of Defense Metabolites in Arabidopsis thaliana Using Genome-wide Association Mapping
Source: Oxford University Press journal article supplement (doi:10.1534/genetics.109.108522), 2009-09-09
Supplement: tables1.xls [file tables1.xls]

## Sheet: TABLE S1
TABLE S1
ANOVA for 2007 Experiment
For each GSL trait the following model was examined: ysar = β0 + Ss + A(S)sa + Rr + εsar where s = 1,…, 8 (NORDBORG et al. 2002; NORDBORG et al. 2005); r = 1,…4; and a = 1,…,95. The main effects are denoted as S, A and R to represent structure, accession, and replicate block respectively, and error, εsar ~ N(0, σε2). F: F-statistic of the model, dfnum: numerator degrees of freedom, dfdenom: denom…
2007	Description	Abbreviation	F	dfnum	dfdenom	P(F)	R2		β0	η2(structure)	P(structure)	η2(structure/accession)	P(structure/accession)	η2(replicate)	P(replicate)
3-hydroxypropyl		OHP	17.5	96	230	0	0.88	1.52	-0.123	0.257	2.42e-49	0.726	2.28e-57	0.0173	4.65e-06
3-methylsulfinylpropyl		3MSO	60.4	96	230	0	0.962	0.347	-0.0323	0.0401	1e-31	0.957	4.78e-124	0.00269	0.00172
Unknown Alkenyl		OHBUTUNK	5.13	96	230	0	0.682	0.0156	0.141	0.455	8.07e-31	0.524	2.57e-11	0.0212	0.0166
(S)2-hydroxy-but-3-enyl		OHBUTS	26.3	96	230	0	0.917	0.248	1.32	0.55	1.07e-93	0.444	4.52e-54	0.00635	0.00141
4-methylsulfinylbutyl		4MSO	39.8	96	230	0	0.943	0.157	0.00543	0.111	7.24e-49	0.885	5.48e-101	0.00374	0.00307
(R)2-hydroxy-but-3-enyl		OHBUTR	27.9	96	230	0	0.921	0.866	4.67	0.555	1.19e-96	0.438	7.27e-56	0.0062	0.0011
Allyl		ALLYL	12.5	96	230	0	0.839	4.97	0.639	0.43	4.4e-55	0.54	1.63e-34	0.0307	1.9e-07
5-methylsulfinylpentyl		5MSO	1.22	96	230	0.117	0.337	0.0265	-0.0167	0.0593	0.438	0.904	0.114	0.0365	0.236
But-3-enyl		BUTENYL	14.2	96	230	0	0.856	1.1	3.45	0.279	2.96e-45	0.717	7.04e-49	0.00441	0.114
3-methylthiopropyl		3MT	13.6	96	230	0	0.85	0.0564	0.00443	0.0936	1.8e-18	0.888	2.67e-55	0.0184	4.4e-05
4-hydroxy-indol-3-ylmethyl		4OHI3M	-	-	-	-	-	-	-	-	-	-	-	-	-
7-methylsulfinylheptyl		7MSO	3.78	96	230	1.11e-16	0.612	0.0494	0.0362	0.224	1.31e-12	0.714	2.37e-11	0.0625	7.7e-05
Pent-4-enyl		PENTENYL	5.36	96	230	0	0.691	0.02	0.0743	0.307	3.84e-23	0.673	2.59e-17	0.0201	0.0173
4-methylthiobutyl		4MT	20.2	96	230	0	0.894	0.107	-0.00959	0.564	1.23e-83	0.433	2.15e-43	0.00314	0.111
8-methylsulfinyloctyl		8MSO	3.68	96	230	4.44e-16	0.606	1.22	0.711	0.193	1.23e-10	0.715	6.3e-11	0.0922	1.05e-06
Indol-3-ylmethyl		I3M	8.95	96	230	0	0.789	0.824	0.783	0.144	1.14e-18	0.645	8.15e-30	0.211	7.95e-29
4-methoxy-indol-3-ylmethyl		4MOI3M	9.83	96	230	0	0.804	0.202	0.169	0.107	1.82e-15	0.713	6.92e-36	0.18	1.85e-27
N-methoxy-indol-3-ylmethyl		NMOI3M	2.74	96	231	3.01e-10	0.532	0.0161	0.0408	0.097	0.00095	0.765	2.39e-07	0.138	2.23e-07
7-methylthioheptyl		7MT	1.53	96	231	0.00497	0.389	0.0655	0.142	0.269	4.71e-06	0.559	0.585	0.172	2.46e-05
8-methylthiooctyl		8MT	4.79	96	231	0	0.665	0.541	0.619	0.131	2.38e-09	0.72	2.62e-16	0.15	5.18e-13
4-hydroxybutyl		OHB	1.23	96	230	0.111	0.338	0.00189	-0.00222	0.0834	0.206	0.856	0.18	0.0611	0.0692
5-methylthiopentyl		5MT	2.38	96	231	5.87e-08	0.497	0.0255	0.0547	0.0677	0.0345	0.309	0.857	0.623	6.4e-24
Total C3 Aliphatic	Sum of all propyl glucosinolates	C3	6.48	96	279	0	0.69	5.97	0.92	0.284	1.26e-26	0.594	1.67e-20	0.122	1.73e-14
Total C4 Aliphatic	Sum of all butyl glucosinolates	C4	8.71	96	279	0	0.75	2.16	7.53	0.415	1.84e-45	0.552	6.35e-27	0.0326	9.43e-06
Total C5 Aliphatic	Sum of all pentyl glucosinolates	C5	1.33	96	279	0.0368	0.315	0.0626	0.0684	0.126	0.0263	0.777	0.19	0.0968	0.00686
Total C7 Aliphatic	Sum of all heptyl glucosinolates	C7	2.04	96	279	3.34e-06	0.413	0.0999	0.113	0.367	1.91e-11	0.57	0.0596	0.0634	0.00679
Total C8 Aliphatic	Sum of all octyl glucosinolates	C8	2.7	96	279	1.11e-10	0.481	1.53	1.18	0.171	6.91e-07	0.569	0.000584	0.261	4.52e-13
Total C3 and C4 Aliphatic	Sum of propyl and butyl glucosinolates	SC	3.75	96	279	0	0.564	8.14	8.45	0.222	9.14e-13	0.506	2.22e-06	0.272	3.93e-18
Total C7 and C8 Aliphatic	Sum of heptyl and octyl glucosinolates	LC	2.51	96	279	2.26e-09	0.463	1.63	1.29	0.206	8.16e-08	0.585	0.00147	0.209	5e-10
Total Alkenyl Aliphatic	Sum of all alkenyl glucosinolates	Alkenyl	5.96	96	279	0	0.672	6.24	8.41	0.327	6.12e-28	0.567	3.53e-17	0.106	6.16e-12
Total Methylsulfinyl Aliphatic	Sum of all methylsulfinyl glucosinolates	MSO	9.77		279	0	0.771	0.437	0.0781	0.0425	3.6e-06	0.937	1.9e-50	0.0203	0.000358
Total Hydroxyalkyl Aliphatic	Sum of all hydroxyalkyl glucosinolates	OH	11.7	96	279	0	0.801	1.32	-0.0835	0.254	3.19e-39	0.73	1.46e-47	0.0169	0.000368
Total Hydroxyalkenyl Aliphatic	Sum of all hydroxyalkenyl glucosinolates	OHAlk	15.8	96	279	0	0.845	0.98	4.67	0.532	1.56e-78	0.455	8.79e-41	0.0127	0.000331
Ratio of C3 to SC Aliphatic	Ratio of propyl to propyl plus butyl glucosinolates	ElongSC	1130	96	229	0	0.998	0.727	0.111	0.459	6.94e-264	0.537	5.64e-238	0.00334	7.23e-47
Ratio of C7 to LC Aliphatic	Ratio of heptyl to heptyl plus octyl glucosinolates	ElongLC	3.42	96	227	1.92e-14	0.591	0.0446	0.11	0.415	2.5e-20	0.493	0.000103	0.0919	2.98e-06
Ratio of C3 methylthio to total C3	Ratio of 3-methylthiopropyl to propyl glucosinolates	GSOX3	7.66	93	217	0	0.766	0.023	0.00794	0.229	1.77e-23	0.761	7.77e-29	0.0101	0.0699
Ratio of C4 methylthio to total C4	Ratio of 4-methylthiobutyl to butyl glucosinolates	GSOX4	172	67	84	0	0.993	0.0907	0.00229	0.606	5.09e-78	0.386	1.95e-54	0.00866	2.78e-14
Ratio of C7 methylthio to total C7	Ratio of 7-methylthioheptyl to heptyl glucosinolates	GSOX7	2.73	72	70	1.86e-05	0.738	0.604	0.839	0.0693	0.0748	0.922	9.02e-06	0.00836	0.651
Ratio of C8 methylthio to total C8	Ratio of 8-methylthiooctyl to octyl glucosinolates	GSOX8	2.71	96	227	5.28e-10	0.534	0.34	0.492	0.0985	0.000909	0.876	3.67e-09	0.0254	0.0889
Total Indolic Glucosinolate	Sum of all indole glucosinolates	TIND	4.94	96	279	0	0.629	0.904	0.851	0.0854	2.88e-06	0.461	4.61e-09	0.454	2.1e-34
Total Indolic Glucosinolate with 4 hydroxylation	Sum of all 4 modified indole glucosinolates	TOH4	4.88	96	279	0	0.627	0.175	0.143	0.1	2.25e-07	0.609	3.24e-14	0.29	6.74e-24
Ratio of TOH4 to TIND	Ratio of 4 modified indole to total indole glucosinolates	OH4Per	13	96	229	0	0.845	0.21	0.17	0.277	1.95e-42	0.716	1.69e-45	0.00703	0.0347
Ratio of NMOI3M to TIND	Ration of N modified indole to total indole glucosinolates	NOHPer	2.44	96	229	2.67e-08	0.505	0.0149	0.0377	0.18	1.91e-06	0.787	3.66e-06	0.0328	0.0563
