# Supplementary material for: Understanding the Evolution of Defense Metabolites in Arabidopsis thaliana Using Genome-wide Association Mapping
Source: Oxford University Press journal article supplement (doi:10.1534/genetics.109.108522), 2009-09-09
Supplement: tables2.xls [file tables2.xls]

## Sheet: TABLE S2
TABLE S2
ANOVA for 2008 Experiment
For each GSL trait the following model was examined: ysar = β0 + Ss + A(S)sa + Rr + εsar where s = 1,…, 8 (NORDBORG et al. 2002; NORDBORG et al. 2005); r = 1,…4; and a = 1,…,95. The main effects are denoted as S, A and R to represent structure, accession, and replicate block respectively, and error, εsar ~ N(0, σε2). F: F-statistic of the model, dfnum: numerator degrees of freedom, dfdenom: denom…
2008	Description	Abbreviation	F	dfnum	dfdenom	P(F)	R2		β0	η2(structure)	P(structure)	η2(structure/accession)	P(structure/accession)	η2(replicate)	P(replicate)
3-hydroxypropyl		OHP	8.86	96	270	0	0.759	1.56	-0.146	0.142	7.17e-19	0.856	4.19e-42	0.00167	0.7
3-methylsulfinylpropyl		X3MSO	7.63	96	270	0	0.731	0.189	0.0171	0.0332	0.00141	0.951	1.9e-40	0.016	0.00935
Unknown Alkenyl		OHBUTUNK	1.57	96	88	0.0158	0.632	0.0233	0.246	0.505	7.72e-10	0.367	0.979	0.127	0.000554
(S)2-hydroxy-but-3-enyl		OHBUTS	11.4	96	270	0	0.802	0.314	2.4	0.56	1.25e-65	0.435	2.37e-27	0.00545	0.117
4-methylsulfinylbutyl		X4MSO	4.92	96	270	0	0.636	0.165	0.0641	0.171	8.13e-13	0.816	2.56e-21	0.0134	0.0999
(R)2-hydroxy-but-3-enyl		OHBUTR	12	96	270	0	0.811	1.02	7.49	0.56	4.98e-68	0.436	3.05e-29	0.00433	0.174
Allyl		ALLYL	7.52	96	270	0	0.728	5.34	2.16	0.329	1.08e-33	0.669	6.81e-28	0.0028	0.569
5-methylsulfinylpentyl		X5MSO	1.23	96	270	0.105	0.304	0.0042	0.00782	0.206	0.00141	0.701	0.581	0.0923	0.0137
But-3-enyl		BUTENYL	7.23	96	270	0	0.72	1.14	4.79	0.193	9.8e-21	0.804	1.49e-32	0.00301	0.555
3-methylthiopropyl		X3MT	2.93	96	270	3.46e-12	0.511	0.0203	-0.00934	0.207	3.15e-09	0.786	3.25e-09	0.00633	0.619
4-hydroxy-indol-3-ylmethyl		X4OHI3M	1.94	96	270	1.69e-05	0.408	0.00433	0.00526	0.107	0.00687	0.76	0.00142	0.133	2.95e-05
7-methylsulfinylheptyl		X7MSO	4.83	96	270	0	0.632	0.0453	0.124	0.317	1.78e-22	0.675	4.35e-16	0.00886	0.252
Pent-4-enyl		PENTENYL	1.29	96	270	0.0587	0.314	0.107	1.03	0.168	0.00514	0.754	0.307	0.0776	0.0238
4-methylthiobutyl		X4MT	8.59	96	270	0	0.753	0.122	0.0746	0.57	1.68e-55	0.423	9.88e-19	0.00665	0.143
8-methylsulfinyloctyl		X8MSO	2.36	96	270	2.74e-08	0.457	0.978	0.881	0.111	0.000982	0.79	4.09e-06	0.0983	8.38e-05
Indol-3-ylmethyl		I3M	6.07	96	270	0	0.683	0.942	1.98	0.161	8.14e-15	0.721	9.85e-24	0.118	2.82e-13
4-methoxy-indol-3-ylmethyl		X4MOI3M	5.68	96	270	0	0.669	0.253	0.296	0.0717	5.11e-06	0.791	1.76e-24	0.137	2.86e-14
N-methoxy-indol-3-ylmethyl		NMOI3M	3.68	96	270	0	0.567	0.0149	0.068	0.155	1.21e-08	0.579	5.85e-08	0.265	2.22e-17
7-methylthioheptyl		X7MT	3.66	96	270	0	0.566	0.0434	0.121	0.314	2.46e-17	0.659	5.41e-10	0.0271	0.0245
8-methylthiooctyl		X8MT	3.72	96	270	0	0.57	0.374	0.616	0.132	2.34e-07	0.808	2.7e-14	0.0607	0.000111
4-hydroxybutyl		OHB	-	-	-	-	-	-	-	-	-	-	-	-	-
5-methylthiopentyl		X5MT	-	-	-	-	-	-	-	-	-	-	-	-	-
Total C3 Aliphatic	Sum of all propyl glucosinolates	C3	5.09	97	279	0	0.639	6.92	1.81	0.227	1.26e-17	0.769	5.34e-21	0.00492	0.49
Total C4 Aliphatic	Sum of all butyl glucosinolates	C4	7.48	97	279	0	0.722	2.69	15	0.383	1.82e-38	0.613	1.38e-25	0.00395	0.414
Total C5 Aliphatic	Sum of all pentyl glucosinolates	C5	1.32	97	279	0.0402	0.315	0.109	1.04	0.176	0.00262	0.752	0.261	0.0721	0.0275
Total C7 Aliphatic	Sum of all heptyl glucosinolates	C7	5.38	97	279	0	0.652	0.0864	0.246	0.319	2.93e-25	0.668	8.96e-19	0.0137	0.0694
Total C8 Aliphatic	Sum of all octyl glucosinolates	C8	2.52	97	279	1.79e-09	0.467	1.32	1.49	0.0907	0.00311	0.819	1.5e-07	0.0904	9.21e-05
Total C3 and C4 Aliphatic	Sum of propyl and butyl glucosinolates	SC	3.21	97	279	2.53e-14	0.527	9.62	16.8	0.175	1.3e-08	0.81	1.65e-11	0.0148	0.206
Total C7 and C8 Aliphatic	Sum of heptyl and octyl glucosinolates	LC	2.61	97	279	3.68e-10	0.476	1.4	1.73	0.116	0.000208	0.81	5.75e-08	0.0742	0.00039
Total Alkenyl Aliphatic	Sum of all alkenyl glucosinolates	Alkenyl	5.25	97	279	0	0.646	7.61	16.8	0.277	7.14e-22	0.718	5.04e-20	0.00475	0.491
Total Methylsulfinyl Aliphatic	Sum of all methylsulfinyl glucosinolates	MSO	5.97	97	279	0	0.675	0.345	0.0807	0.103	1.97e-09	0.878	8.92e-30	0.0193	0.0118
Total Hydroxyalkyl Aliphatic	Sum of all hydroxyalkyl glucosinolates	OH	9.09	97	279	0	0.76	1.52	-0.141	0.143	8.87e-20	0.855	5.49e-44	0.00169	0.686
Total Hydroxyalkenyl Aliphatic	Sum of all hydroxyalkenyl glucosinolates	OHAlk	10.8	97	279	0	0.789	1.31	10	0.563	6.68e-65	0.433	5.23e-26	0.00455	0.194
Ratio of C3 to SC Aliphatic	Ratio of propyl to propyl plus butyl glucosinolates	ElongSC	218	96	269	0	0.987	0.712	0.105	0.421	2.21e-201	0.578	9.57e-184	0.00137	5.34e-06
Ratio of C7 to LC Aliphatic	Ratio of heptyl to heptyl plus octyl glucosinolates	ElongLC	6.93	96	257	0	0.721	0.0449	0.0944	0.344	2.63e-32	0.568	2.45e-20	0.0882	1.9e-11
Ratio of C3 methylthio to total C3	Ratio of 3-methylthiopropyl to propyl glucosinolates	GSOX3	11.7	94	241	0	0.82	0.0155	-0.00281	0.516	1.13e-59	0.482	1.6e-29	0.00265	0.408
Ratio of C4 methylthio to total C4	Ratio of 4-methylthiobutyl to butyl glucosinolates	GSOX4	37.9	56	100	0	0.955	0.0841	-0.00428	0.728	7.57e-58	0.269	2.59e-25	0.00361	0.0594
Ratio of C7 methylthio to total C7	Ratio of 7-methylthioheptyl to heptyl glucosinolates	GSOX7	2.45	64	68	0.000172	0.697	0.647	0.454	0.185	0.000768	0.807	0.000482	0.00796	0.742
Ratio of C8 methylthio to total C8	Ratio of 8-methylthiooctyl to octyl glucosinolates	GSOX8	1.81	96	257	0.000115	0.404	0.366	0.55	0.101	0.0158	0.864	0.000421	0.0341	0.117
Total Indolic Glucosinolate	Sum of all indole glucosinolates	TIND	5	97	279	0	0.635	1.18	2.33	0.144	3.88e-11	0.698	5.27e-18	0.158	1.21e-14
Total Indolic Glucosinolate with 4 hydroxylation	Sum of all 4 modified indole glucosinolates	TOH4	5.76	97	279	0	0.667	0.251	0.298	0.062	2.7e-05	0.812	3.52e-26	0.126	1.6e-13
Ratio of TOH4 to TIND	Ratio of 4 modified indole to total indole glucosinolates	OH4Per	13.6	96	270	0	0.829	0.233	0.118	0.144	5.63e-28	0.854	1.16e-59	0.00105	0.712
Ratio of NMOI3M to TIND	Ration of N modified indole to total indole glucosinolates	NOHPer	4.06	96	270	0	0.59	0.0117	0.0323	0.227	5.42e-14	0.597	4.7e-10	0.176	3.44e-13
