# Supplementary material for: Understanding the Evolution of Defense Metabolites in Arabidopsis thaliana Using Genome-wide Association Mapping
Source: Oxford University Press journal article supplement (doi:10.1534/genetics.109.108522), 2009-09-09
Supplement: tables3.xls [file tables3.xls]

## Sheet: TABLE S3
TABLE S3
Average glucosinolate values per accession for both experiments
All metabolite values are in nmol per mg fresh weight tissue. This is the average of four independent plants per accession.
Accession	3-hydroxypropyl (2007)	3-methylsulfinylpropyl (2007)	Unknown Alkenyl (2007)	4-hydroxybutyl (2007)	(S)2-hydroxy-but-3-enyl (2007)	(R)2-hydroxy-but-3-enyl (2007)	4-methylsulfinylbutyl (2007)	Allyl (2007)	5-methylsulfinylpentyl (2007)	But-3-enyl (2007)	3-methylthiopropyl (2007)	7-methylsulfinylheptyl (2007)	Pent-4-enyl (2007)	4-methylthiobutyl (2007)	8-methylsulfinyloctyl (2007)	Indol-3-ylmethyl (2007)	4-methoxy-indol-3-ylmethyl (2007)	5-methylthiopentyl (2007)	N-methoxy-indol-3-ylmethyl (2007)	7-methylthioheptyl (2007)	8-methylthiooctyl (2007)	Total C3 Aliphatic (2007)	Total C4 Aliphatic (2007)	Total C5 Aliphatic (2007)	Total C7 Aliphatic (2007)	Total C8 Aliphatic (2007)	Total C3 and C4 Aliphatic (2007)	Total C7 and C8 Aliphatic (2007)	Total Alkenyl Aliphatic (2007)	Total Methylsulfinyl Aliphatic (2007)	Total Hydroxyalkyl Aliphatic (2007)	Total Hydroxyalkenyl Aliphatic (2007)	Ratio of C3 to SC Aliphatic (2007)	Ratio of C7 to LC Aliphatic (2007)	Ratio of C3 methylthio to total C3 (2007)	Ratio of C4 methylthio to total C4 (2007)	Ratio of C7 methylthio to total C7 (2007)	Ratio of C8 methylthio to total C8 (2007)	Total Indolic Glucosinolate (2007)	Total Indolic Glucosinolate with 4 hydroxylation (2007)	Ratio of TOH4 to TIND (2007)	Ratio of NMOI3M to TIND (2007)	3-hydroxypropyl (2008)	3-methylsulfinylpropyl (2008)	Unknown Alkenyl (2008)	(S)2-hydroxy-but-3-enyl (2008)	4-methylsulfinylbutyl (2008)	(R)2-hydroxy-but-3-enyl (2008)	Alllyl (2008)
Ag-0	0.111083	0	0.145551	0	1.35727	4.78894	0	1.18816	0	3.56206	0	0.039543	0.0733919	0	0.800819	0.927011	0.208465	0.0578568	0.0468073	0.146553	0.65176	1.29924	9.70827	0.0578568	0.186096	1.45258	11.0075	1.63867	11.042	0.840362	0.111083	6.14621	0.118033	0.128114	0	0	0.787513	0.448691	1.18228	0.208465	0.176324	0.224534	0	0.0829799	0.237462	2.34091	0	7.31514	1.66869
An-1	0.116905	0	0.0787616	0	1.51655	5.07921	0	1.33898	0	1.92915	0	0.221038	0.0316963	0.0261548	1.54317	1.26768	0.185002	0	0.0361216	0.155164	0.581922	1.45589	8.55107	0	0.376203	2.12509	10.007	2.5013	9.94266	1.76421	0.116905	6.59576	0.145488	0.177029	0	0.842106	0.412449	0.273833	1.48881	0.185002	0.124262	0.19525	0	0	0	1.62493	0	5.23564	1.38941
Bay-0	5.95706	0.168696	0	0	0	0	0	0.0647138	0.0592152	0	0.0871703	0.0453841	0	0.0310588	1.94612	0.465234	0.372661	0	0.0386874	0.121369	0.801997	6.27764	0.0310588	0.0592152	0.166753	2.74812	6.3087	2.91487	0.0647138	2.21941	5.95706	0	0.995077	0.060679	0.0138859	0.68458	0.727836	0.291835	0.876583	0.372661	0.425129	0.103814	5.85966	0.00527833	0	0	0	0	0
Bil-5	0	0	0	0	0	0	0	8.53654	0	0.0453692	0.083234	0	0	0	1.09155	0.599459	0.597034	0.132011	0.0151245	0.0339687	0.68342	8.61978	0.0453692	0.132011	0.0339687	1.77497	8.66515	1.80894	8.58191	1.09155	0	0	0.994764	0.0191376	0.00965617	0	1	0.385032	1.21162	0.597034	0.492758	0.0253328	0	0	0	0	0	0	14.1275
Bil-7	0	0	0	0	0	0	0	10.5647	0	0	0.0677067	0.0491374	0	0	1.53536	0.7158	0.491199	0.156462	0.0193574	0.0475774	0.676281	10.6324	0	0.156462	0.0967148	2.21164	10.6324	2.30835	10.5647	1.5845	0	0	1	0.0437299	0.00636794	0	0.491935	0.305783	1.22636	0.491199	0.400535	0.0394085	0	0	0	0	0	0	12.7072
Bor-1	7.98604	0.0681461	0	0	0	0	0	0	0	0.128921	0	0	0	0	0.824973	0.77979	0.173782	0.1618	0.0337476	0.0060175	0.583309	8.05419	0.128921	0.1618	0.0060175	1.40828	8.18311	1.4143	0.128921	0.893119	7.98604	0	0.984246	0.00427294	0	0	1	0.414199	0.98732	0.173782	0.176014	0.194194	6.98157	0.0627543	0	0	0	0	0
Bor-4	8.0699	0	0	0	0	0	0	0	0	0	0	0	0	0	1.27459	0.853864	0.181743	0.0846562	0.00657986	0	0.589311	8.0699	0	0.0846562	0	1.8639	8.0699	1.8639	0	1.27459	8.0699	0	1	0	0	0	0	0.31617	1.04219	0.181743	0.174386	0.0362042	4.2443	0	0	0	0	0	0
Br-0	0.0945455	0	0	0	1.02102	3.24331	0	0.604411	0.0459391	3.26667	0	0.0734953	0.0811254	0	1.50613	1.3581	0.15443	0.113967	0.00517925	0.0956305	0.677599	0.698956	7.53099	0.159906	0.169126	2.18373	8.22995	2.35285	8.1354	1.62556	0.0945455	4.26433	0.0849284	0.0774481	0	0	0.56544	0.310295	1.5177	0.15443	0.101752	0.0335379	0	0.0418726	0.11911	1.751	0	5.73986	1.00152
Bur-0	0	0	0	0	0.858266	2.80907	0	4.63413	0	7.81319	0	0.260385	0.208837	0	2.5547	0.985474	0.266753	0.0407813	0.0488006	0.123778	0.564172	4.63413	11.4805	0.0407813	0.384163	3.11887	16.1147	3.50303	16.1147	2.81508	0	3.66734	0.287572	0.123174	0	0	0.322203	0.18089	1.30103	0.266753	0.205032	0.182943	0	0	0	0.906583	0	2.81655	5.71964
C24	0.15896	0.221678	0.0327873	0	0.0488805	0.242279	0	0.942462	0	9.23298	0.940226	0.413178	0.0552187	0	3.84888	0.348311	0.404798	0	0.033416	0.457104	1.52082	2.26333	9.52414	0	0.870281	5.3697	11.7875	6.23998	10.4994	4.48374	0.15896	0.29116	0.192011	0.162073	0.415418	0	0.525237	0.283222	0.786525	0.404798	0.514666	0.0825499	0.148397	0.178917	0	0	0	0.0216331	0.809889
CIBC-17	0.0203896	0	0	0	0	0	0	9.82172	0.0570363	0	0	0.0231791	0	0	1.6693	1.27866	0.188324	0	0.0730181	0.0937979	0.681331	9.84211	0	0.0570363	0.116977	2.35063	9.84211	2.46761	9.82172	1.74951	0.0203896	0	1	0.0497641	0	0	0.801849	0.289851	1.54001	0.188324	0.122288	0.387727	0	0	0	0	0	0	9.42693
CIBC-5	0.0112128	0	0.190904	0	1.66906	5.49701	0	0.188292	0.0316778	2.96584	0	0.368333	0.133105	0	1.80667	0.963655	0.158635	0.0597929	0.0183599	0.102821	0.288951	0.199504	10.1319	0.0914707	0.471154	2.09562	10.3314	2.56677	10.5111	2.20668	0.0112128	7.16607	0.0193105	0.224828	0	0	0.218232	0.137883	1.14065	0.158635	0.139074	0.115736	0	0	0.145855	1.74639	0	5.65165	0.396967
Col-0	0.116246	0.487775	0	0.0700649	0	0	2.66377	0	0.10097	0.0545019	0.0657092	0.0630126	0.0387211	0.77618	0.57695	0.812638	0.244967	0	0.0245602	0	0.175115	0.66973	3.56452	0.10097	0.0630126	0.752065	4.23425	0.815078	0.0545019	3.89248	0.186311	0	0.15817	0.0837861	0.098113	6.02595	0	0.232846	1.08216	0.244967	0.226367	0.100259	0	0.293212	0.0159125	0	1.58515	0	0
CS22491	0.127522	0	0	0	0	0.0999641	0.028842	9.04925	0	0	0.0189478	0	0	0	0.449897	0.332058	0.080393	0	0.0274747	0.0281065	0.273289	9.19572	0.128806	0	0.0281065	0.723186	9.32453	0.751293	9.14922	0.478739	0.127522	0.0999641	0.986186	0.0388649	0.00206051	0	1	0.377896	0.439925	0.080393	0.182742	0.341755	0	0	0	0	0	0	7.18148
Ct-1	9.53491	0.139884	0	0	0	0	0	0.140514	0.155995	0	0	0	0	0	1.03688	1.27316	0.110752	0	0.06035	0	0.515418	9.81531	0	0.155995	0	1.55229	9.81531	1.55229	0.140514	1.33276	9.53491	0	1	0	0	0	0	0.332036	1.44426	0.110752	0.0766843	0.544912	3.92064	0	0	0	0	0	0
Cvi-0	0.123541	0	0.0206087	0	0	0	0	3.54349	0	7.51432	0	0.0132469	0.0248266	0	0.464963	0.244609	0.0934729	0	0	0.0370124	0.280606	3.66703	7.51432	0	0.0502593	0.745569	11.1814	0.795828	11.0784	0.47821	0.123541	0	0.32796	0.0674106	0	0	0.736429	0.376365	0.338082	0.0934729	0.27648	0
Eden-1	0	0	0	0	0	0	0	10.3299	0	0.0910839	0	0	0	0	1.14317	0.56189	0.37069	0.0682408	0.015738	0.0264328	0.886104	10.3299	0.0910839	0.0682408	0.0264328	2.02928	10.421	2.05571	10.421	1.14317	0	0	0.99126	0.0130258	0	0	1	0.43666	0.948318	0.37069	0.390892	0.0424561	0	0	0	0	0	0	4.69703
Eden-2	0	0	0	0	0	0	0	9.30102	0	0.0666668	0.0145161	0.170572	0	0	1.22348	0.53815	0.274028	0.0828517	0.0108094	0	0.65187	9.31554	0.0666668	0.0828517	0.170572	1.87535	9.3822	2.04592	9.36769	1.39405	0	0	0.992894	0.0909548	0.00155827	0	0	0.347599	0.822988	0.274028	0.332967	0.0394464	0	0.0472597	0	0	0	0	7.39174
Edi-0	0	0.120105	0	0	0	0	0	9.4491	0	0	0.20997	0	0	0	1.48617	0.907073	0.12146	0	0.0168093	0.0230238	0.602141	9.77918	0	0	0.0230238	2.08831	9.77918	2.11133	9.4491	1.60627	0	0	1	0.0110251	0.0214711	0	1	0.288339	1.04534	0.12146	0.116192	0.138394	0	0.0662528	0	0	0	0	13.5621
Ei-2	0.0402561	0.0439481	0	0	0.029025	0.0217482	0	9.52748	0	0.0244829	0.0475839	0.024053	0	0	1.8363	0.730296	0.160917	0.0211737	0.0209352	0.0224321	0.920128	9.65927	0.0752561	0.0211737	0.0464851	2.75643	9.73452	2.80291	9.60274	1.9043	0.0402561	0.0507732	0.992269	0.0168643	0.00492624	0	0.482565	0.333812	0.912148	0.160917	0.176415	0.1301	0	0.0854684	0	0	0	0	8.22722
Est-1	0.182995	0.135403	0	0	0	0	1.05536	0	0.0726813	0	0.00640215	0	0	0.628841	0.850251	0.802212	0.128865	0	0	0	0.129138	0.3248	1.68421	0.0726813	0	0.979389	2.00901	0.979389	0	2.1137	0.182995	0	0.161672	0	0.0197111	2.13542	0	0.131856	0.931077	0.128865	0.138404	0	0	0	0	0	1.07312	0	0
Fab-2	0.010239	0.186297	0	0	0	0	0	16.4177	0	0.294482	0.407814	0.0737727	0	0	2.64202	0.250575	0.255474	0.0458391	0.00983318	0.0205404	0.795348	17.0221	0.294482	0.0458391	0.0943131	3.43737	17.3165	3.53168	16.7122	2.90209	0.010239	0	0.982994	0.0274376	0.023958	0	0.21779	0.231383	0.515883	0.255474	0.495218	0.0384899	0	0.0452045	0	0	0	0	10.7487
Fab-4	0	0.0793179	0	0	0	0	0	12.2493	0	0.20663	0	0	0	0	1.36885	0.450332	0.216097	0.0568051	0.0138223	0.421085	0.940902	12.3287	0.20663	0.0568051	0.421085	2.30975	12.5353	2.73084	12.456	1.44817	0	0	0.983516	0.182308	0	0	1	0.407361	0.680251	0.216097	0.317673	0.0639635	0	0	0	0	0	0	6.90836
Fei-0	0	0	0.0412439	0	1.27824	4.22549	0	1.10051	0	1.85387	0	0.188561	0.0356759	0	2.17028	0.821563	0.308943	0	0	0.101073	0.374935	1.10051	7.3576	0	0.289634	2.54522	8.45811	2.83485	8.49935	2.35884	0	5.50373	0.130114	0.113795	0	0	0.348969	0.14731	1.13051	0.308943	0.273278	0	0	0	0.080961	1.50732	0	4.96582	1.41424
Ga-0	0.277248	0.0481054	0	0	0.0300773	0.113987	0	11.6016	0.317265	0.0758279	0	0	0	0	1.3937	1.16595	0.163117	0	0.0661166	0.00814526	0.791997	11.9269	0.219892	0.317265	0.00814526	2.1857	12.1468	2.19384	11.8215	1.75907	0.277248	0.144064	0.981897	0.00372662	0	0	1	0.362354	1.39519	0.163117	0.116914	0.405333	0	0.0641115	0	0.232094	0	0.757434	8.54167
Got-22	0	0	0	0	0	0	0	6.80757	0	0	0	0	0	0	0.774598	0.694242	0.129066	0	0.00675985	0	0.531814	6.80757	0	0	0	1.30641	6.80757	1.30641	6.80757	0.774598	0	0	1	0	0	0	0	0.40708	0.830067	0.129066	0.155488	0.0523753	0	0	0	0	0	0	10.4142
Got-7	0.0613905	0	0	0	0	0.0175573	0	5.97051	0	0	0	0	0	0	0.637908	0.656829	0.130071	0	0.00872378	0	0.530684	6.0319	0.0175573	0	0	1.16859	6.04945	1.16859	5.98806	0.637908	0.0613905	0.0175573	0.997098	0	0	0	0	0.454122	0.795624	0.130071	0.163483	0.0670694	0	0	0	0	0	0	5.41047
Gu-0	0	0.160812	0	0	0	0	0.720568	0	0	0.0355439	0	0.0580987	0.0295839	0.670843	1.22392	0.594707	0.242072	0	0.0253857	0	0.3905	0.160812	1.42696	0	0.0580987	1.61442	1.58777	1.67252	0.0355439	2.1634	0	0	0.101282	0.0359874	0	0.107921	0	0.241883	0.862165	0.242072	0.280772	0.104869	0	0.0539772	0	0	0.485401	0	0
Gy-0	0.295004	0.0863748	0.0379472	0	1.22047	3.96129	0	0.962448	0.0725112	1.03431	0.0326047	0.13765	0.091996	0	1.057	0.888111	0.283036	0	0	0.440855	0.398438	1.37643	6.21607	0.0725112	0.578505	1.45544	7.5925	2.03395	7.21646	1.35354	0.295004	5.18176	0.181288	0.397477	0.0236879	0	0.76206	0.273757	1.17115	0.283036	0.241674	0	0	0.0529762	0.15385	2.08343	0	6.60905	1.52911
HR-10	0	0.0504693	0.084503	0	1.41692	4.63973	0	0.944923	0	2.41188	0	0.117273	0.0919842	0	1.12919	0.67083	0.264012	0.077733	0.0133038	0.106874	0.451781	0.995393	8.46853	0.077733	0.224146	1.58098	9.46392	1.80512	9.49795	1.29694	0	6.05665	0.105178	0.141777	0	0	0.476803	0.285761	0.948146	0.264012	0.278451	0.050391	0	0.0366397	0.161276	1.76005	0	5.65622	1.0845
HR-5	0	0	0.0707596	0	1.44017	4.92166	0	0.23771	0.107901	3.21795	0	0.121127	0.0782593	0	1.42586	0.9781	0.278593	0.0666669	0.0124057	0.11524	0.526195	0.23771	9.57978	0.174568	0.236368	1.95205	9.81749	2.18842	9.88825	1.65488	0	6.36183	0.0242129	0.121087	0	0	0.487547	0.26956	1.2691	0.278593	0.219521	0.0445298	0	0	0.202862	1.67469	0	5.26981	0.190749
Kas-2	0	0.192443	0	0	0	0.130018	0	8.46118	0	16.7177	0	0	0	0	0.689051	0.843829	0.611518	0	0.0603296	0.0108463	0.674046	8.65363	16.8477	0	0.0108463	1.3631	25.5013	1.37394	25.3089	0.881494	0	0.130018	0.33934	0.00795712	0	0	1	0.494496	1.51568	0.611518	0.403462	0.0986555	0	0	0	0	0	0	2.35841
Kin-0	0.0317398	0	0.145971	0	1.81501	6.23013	0	0.635819	0	2.49912	0	0.202929	0.100722	0	1.20977	0.981127	0.224483	0	0.00650685	0.0858732	0.306597	0.667559	10.5443	0	0.288802	1.51637	11.2118	1.80517	11.326	1.4127	0.0317398	8.04514	0.0595407	0.190456	0	0	0.297342	0.202192	1.21212	0.224483	0.185199	0.0289859	0	0.192735	0.0651596	2.74091	0	9.05744	0.738287
Knox-10	0	0.0273506	0	0	0	0	0	8.06719	0.116968	0	0.0299229	0	0	0	0.985519	0.565821	0.093031	0	0	0	0.58582	8.12446	0	0.116968	0	1.57134	8.12446	1.57134	8.06719	1.12984	0	0	1	0	0.00368306	0	0	0.372816	0.658852	0.093031	0.141202	0	0	0	0	0	0	0	4.18249
Knox-18	0	0	0	0	0	0	0	8.68463	0.0914911	0	0	0	0	0	0.849249	0.550788	0.141292	0	0.0216747	0.00773645	0.582968	8.68463	0	0.0914911	0.00773645	1.43222	8.68463	1.43995	8.68463	0.94074	0	0	1	0.00540173	0	0	1	0.407039	0.713755	0.141292	0.197956	0.153404	0	0	0	0	0	0	12.2269
Kondara	0	0.0513068	0	0	0	0	0	22.6741	0	0.382275	0	0	0	0	2.09795	1.03576	0.279782	0	0.039939	0	0.531496	22.7255	0.382275	0	0	2.62945	23.1077	2.62945	23.0564	2.14926	0	0	0.983457	0	0	0	0	0.202132	1.35548	0.279782	0.206407	0.142751	0	0	0	0	0	0	20.858
Kz-1	0	0.0382066	0	0	0	0	0	8.32656	0	0.102995	0.0443299	0.036816	0	0	1.05224	0.316284	0.16055	0.0594373	0.0161997	0.0748254	0.664608	8.4091	0.102995	0.0594373	0.111641	1.71685	8.51209	1.82849	8.42956	1.12726	0	0	0.9879	0.065027	0.00527165	0	0.67023	0.387109	0.493034	0.16055	0.325637	0.100901	0	0.0625457	0	0	0	0	11.9739
Kz-9	0.0152009	0.0589302	0	0	0	0	0	6.0534	0	0.0399172	0	0	0	0	0.641895	0.354222	0.0990949	0.0462691	0.0147116	0	0.342897	6.12753	0.0399172	0.0462691	0	0.984793	6.16745	0.984793	6.09332	0.700826	0.0152009	0	0.993528	0	0	0	0	0.348192	0.468028	0.0990949	0.211728	0.14846	0	0	0	0	0	0	6.00374
Ler-1	9.16151	0.0606801	0	0.0950427	0	0	0.0402131	0	0	0.0407714	0.0263295	0.0366173	0.0455784	0	1.14383	0.999061	0.179819	0	0.043898	0	0.537209	9.24852	0.176027	0	0.0366173	1.68104	9.42455	1.71766	0.0407714	1.28134	9.25656	0	0.981322	0.0217825	0.00284689	0	0	0.31957	1.22278	0.179819	0.147058	0.244123	5.7892	0	0	0	0	0	0
Ll-0	0	0	0	0	0	0	0.705658	0	0	0	0	0	0	1.5495	0.831871	0.39439	0.183948	0	0	0	0.351849	0	2.25516	0	0	1.18372	2.25516	1.18372	0	1.53753	0	0	0	0	0	11.8047	0	0.29724	0.578338	0.183948	0.318064	0	0	0	0	0	0.500295	0	0
Lov-1	0	0.0289243	0	0	0	0	0	12.2029	0	0.131261	0	0.117202	0	0	1.31046	0.517809	0.178594	0.0405158	0.0150164	0	0.743623	12.2318	0.131261	0.0405158	0.117202	2.05408	12.3631	2.17128	12.3342	1.45658	0	0	0.989383	0.0570582	0	0	0	0.362022	0.711419	0.178594	0.251039	0.0840811	0	0	0	0	0	0	9.12041
Lov-5	0	0	0	0	0	0	0	10.1821	0.0028643	0.0634813	0	0	0	0	1.37866	0.519073	0.151708	0	0.0489813	0.0609329	0.65307	10.1821	0.0634813	0.0028643	0.0609329	2.03173	10.2456	2.09266	10.2456	1.38152	0	0	0.993804	0.0299907	0	0	1	0.321436	0.719761	0.151708	0.210775	0.322867	0	0.126557	0	0	0	0	14.0899
Lp2-2	5.90736	0.167995	0	0	0	0	0.124498	0	0	0	0	0.201082	0	0	1.12135	0.983506	0.122999	0	0.00666019	0.00476623	0.275974	6.07536	0.124498	0	0.205848	1.39732	6.19985	1.60317	0	1.61492	5.90736	0	0.979919	0.147316	0	0	0.0231541	0.197502	1.11317	0.122999	0.110495	0.0541481	8.4263	0.581027	0	0	0	0	0
Lp2-6	7.91387	0.411283	0	0	0	0	0.145534	0	0.101114	0	0.0425639	0	0	0	0.831653	0.66667	0.221473	0.0359049	0.0102483	0	0.342239	8.36772	0.145534	0.137019	0	1.17389	8.51325	1.17389	0	1.48958	7.91387	0	0.982905	0	0.00508668	0	0	0.291542	0.898391	0.221473	0.246522	0.0462734	13.0919	0.178249	0	0	0	0	0
Lz-0	9.7904	0.0644983	0	0	0	0	0	0.188464	0	0.0296698	0.0251369	0	0	0	0.886146	1.87602	0.315123	0.067881	0.0258266	0.173446	0.904428	10.0685	0.0296698	0.067881	0.173446	1.79057	10.0982	1.96402	0.218134	0.950645	9.7904	0	0.997062	0.096866	0.00249659	0	1	0.505105	2.21697	0.315123	0.142141	0.081957	16.0425	0.0652086	0	0	0	0	0
Mr-0	0	0	0	0	0	0.158186	0	11.9923	0	0.247117	0	0	0	0	2.23929	0.321784	0.231178	0	0.00499305	0.00871246	0.621201	11.9923	0.405303	0	0.00871246	2.86049	12.3976	2.8692	12.3976	2.23929	0	0.158186	0.967308	0.0030458	0	0	1	0.217166	0.557955	0.231178	0.414331	0.0215983	0	0.0766438	0	0	0	0	16.6963
Mrk-0	0.132907	0	0	0	0	0	0	10.5963	0.189967	0	0	0	0	0	1.82648	1.23739	0.138224	0	0	0	0.518705	10.7292	0	0.189967	0	2.34519	10.7292	2.34519	10.5963	2.01645	0.132907	0	1	0	0	0	0	0.221178	1.37561	0.138224	0.100482	0	0	0	0	0	0	0	16.1292
Ms-0	0	0	0	0	0	0	0	6.9556	0	0	0	0	0	0	1.23793	0.994658	0.225601	0	0.0126617	0	0.363007	6.9556	0	0	0	1.60094	6.9556	1.60094	6.9556	1.23793	0	0	1	0	0	0	0	0.226746	1.23292	0.225601	0.182981	0.0561243	0	0	0	0	0	0	12.5747
Mt-0	0	0.137919	0	0	0	0	2.0701	0	0	0	0.139595	0.0284341	0	0.651728	1.33127	1.03209	0.225185	0	0.0176589	0	0.357701	0.277514	2.72183	0	0.0284341	1.68897	2.99934	1.7174	0	3.56772	0	0	0.092525	0.0168352	0.50302	0.10433	0	0.211787	1.27494	0.225185	0.176624	0.0784195	0	0.0605894	0	0	0.712184	0	0
Mz-0	0.311709	0.961896	0	0	0	0	4.88474	0	0.547593	0	0.316993	0	0	1.36208	1.05707	0.683121	0.443431	0	0.00476544	0.00871866	0.49124	1.5906	6.24682	0.547593	0.00871866	1.54831	7.83742	1.55703	0	7.45131	0.311709	0	0.202949	0.00563106	0.199292	19.2516	1	0.317274	1.13132	0.443431	0.39196	0.0107468	0	0.700841	0	0	3.18428	0	0
Nd-1	11.7593	0.303716	0	0	0	0	0.0326192	0.159708	0	0.0381323	0	0	0.0360108	0	0.695483	1.40593	0.0704747	0	0.020431	0.0487305	0.303363	12.2227	0.0707515	0	0.0487305	0.998845	12.2935	1.04758	0.19784	1.03182	11.7593	0	0.994245	0.0487869	0	0	1	0.303713	1.49683	0.0704747	0.0470826	0.289905	6.58705	0.0529679	0	0	0	0	0
NFA-10	0	0	0.176464	0	2.2025	7.27525	0	1.51737	0	3.59559	0	0.30088	0.1111	0	1.93739	0.744952	0.166744	0.0582135	0.0120911	0.340537	0.617788	1.51737	13.0733	0.0582135	0.641418	2.55518	14.5907	3.1966	14.7672	2.23827	0	9.47775	0.103996	0.251026	0	0	0.530914	0.241779	0.923787	0.166744	0.180501	0.0725126	0	0	0.222114	2.41335	0	7.8168	1.88112
NFA-8	0.00918859	0	0.184796	0	2.39132	7.89921	0	1.88664	0.0657906	6.10396	0	0.256238	0.256611	0	2.3795	1.07131	0.278987	0.0701349	0.0234761	0.135799	0.530932	1.89583	16.3945	0.135926	0.392037	2.91043	18.2903	3.30247	18.4659	2.70153	0.00918859	10.2905	0.103652	0.134701	0	0	0.346394	0.182424	1.37377	0.278987	0.203081	0.0841477	0	0.14306	0.0150538	1.96913	0	6.24037	1.46426
Nok-3	0	0	0	0	0	0	0	5.38147	0	0	0	0	0	0	0.761935	0.70081	0.14408	0.0163007	0	0	0.579926	5.38147	0	0.0163007	0	1.34186	5.38147	1.34186	5.38147	0.761935	0	0	1	0	0	0	0	0.43218	0.844889	0.14408	0.170531	0	0	0	0	0	0	0	3.09049
Omo2-1	0	0	0	0	0	0	0	14.3036	0	0.0811891	0	0.117475	0	0	0.927114	1.25864	0.13725	0.0365771	0.0304669	0.0224511	0.649222	14.3036	0.0811891	0.0365771	0.139926	1.57634	14.3848	1.71626	14.3848	1.04459	0	0	0.994356	0.0887665	0	0	0.16045	0.411855	1.42636	0.13725	0.0962242	0.221981	0	0.0817373	0	0	0	0	21.5305
Omo2-3	0	0.0376049	0	0	0	0	0	6.50913	0	0	0.106068	0	0	0	0.637759	0.835529	0.102092	0.0264736	0.00483555	0.0078798	0.309907	6.6528	0	0.0264736	0.0078798	0.947666	6.6528	0.955546	6.50913	0.675364	0	0	1	0.00831496	0.0159434	0	1	0.327021	0.942456	0.102092	0.108326	0.0473645	0	0	0	0	0	0	6.8524
Oy-0	0	3.5355	0	0	0	0	0	0	0	0	0.284591	0	0	0	0.677963	1.01277	0.242724	0.0353611	0	0.0256539	0.503536	3.82009	0	0.0353611	0.0256539	1.1815	3.82009	1.20715	0	4.21346	0	0	1	0.0217131	0.0744986	0	1	0.426184	1.25549	0.242724	0.19333	0	0	4.41934	0	0	0	0	0
Pna-10	0	0	0	0	0	0	0	8.65819	0	0	0.0537429	0	0	0	1.01263	0.577507	0.111067	0	0	0	0.580813	8.71193	0	0	0	1.59344	8.71193	1.59344	8.65819	1.01263	0	0	1	0	0.00616889	0	0	0.364502	0.688575	0.111067	0.1613	0	0	0	0	0	0	0	6.34442
Pna-17	0	0	0	0	0	0	0	11.0301	0	0	0	0.0512367	0	0	2.09974	0.857832	0.154656	0	0.0125165	0	0.513147	11.0301	0	0	0.0512367	2.61288	11.0301	2.66412	11.0301	2.15097	0	0	1	0.0196092	0	0	0	0.196391	1.025	0.154656	0.150883	0.0809311	0	0	0	0	0	0	3.47036
Pro-0	0	0	0	0	0.207799	0.712286	0	2.77551	0	11.3792	0	0.0585701	0.0463718	0	1.01619	0.964267	0.343297	0	0	0.0249944	0.206092	2.77551	12.2993	0	0.0835644	1.22228	15.0748	1.30585	15.0748	1.07476	0	0.920085	0.184116	0.0683676	0	0	0.299103	0.168613	1.30756	0.343297	0.262547	0	0	0	0	0.807463	0	2.71276	1.53307
Pu2-23	0	0	0	0	0	0	0	6.21357	0	0.0549671	0.0346122	0	0	0	1.31503	1.08251	0.106349	0	0.0303466	0.0127988	0.799664	6.24819	0.0549671	0	0.0127988	2.11469	6.30315	2.12749	6.26854	1.31503	0	0	0.991279	0.00605232	0.00553956	0	1	0.378146	1.21921	0.106349	0.0872277	0.28535	0	0	0	0	0	0	13.8825
Pu2-7	0	0	0	0	0	0.00209492	0	10.2816	0	0.0345889	0	0	0	0	1.31407	1.13976	0.297759	0.0744003	0.0191544	0.00880513	0.893973	10.2816	0.0366838	0.0744003	0.00880513	2.20804	10.3183	2.21685	10.3183	1.31407	0	0.00209492	0.996445	0.00398775	0	0	1	0.404871	1.45667	0.297759	0.204411	0.0643286	0	0	0	0	0	0	4.27108
Ra-0	7.92508	0.712916	0	0	0	0	0.0380368	0	0	0	0.201102	0.0803232	0	0	1.32656	1.64127	0.210673	0	0.0357642	0.0068051	0.422344	8.83909	0.0380368	0	0.0871283	1.7489	8.87713	1.83603	0	2.15783	7.92508	0	0.995715	0.0498189	0.0227514	0	0.0781044	0.241491	1.8877	0.210673	0.111603	0.169762	8.8063	0.773586	0	0	0	0	0
Ren-1	0.00786518	0	0.0315265	0	1.13077	4.25295	0	0.0560029	0	0.605904	0	0.0478463	0	0.211762	1.64074	0.462445	0.171299	0	0.00790786	0.498133	0.729673	0.0638681	6.20139	0	0.545979	2.37041	6.26526	2.91639	6.07715	1.68859	0.00786518	5.38372	0.010194	0.230331	0	0.036561	0.912366	0.307825	0.641653	0.171299	0.266966	0.046164	0	0.0599864	0.102931	1.67048	0	5.62414	0
Ren-11	0	0	0.0252426	0	1.09215	3.87446	0.0868805	0	0	0.738535	0	0	0	0	0.89222	0.74949	0.131753	0.0445271	0	0.326491	0.491912	0	5.79203	0.0445271	0.326491	1.38413	5.79203	1.71062	5.73039	0.9791	0	4.96661	0	0.235881	0	0	1	0.355394	0.881243	0.131753	0.149508	0	0	0	0.0927321	1.3154	0	4.35842	0
Rmx-A02	0.0218888	0.0226398	0	0	0	0	0	10.3433	0	0	0.0400504	0	0	0	1.21977	0.54673	0.24079	0.0415035	0	0	0.662061	10.4279	0	0.0415035	0	1.88183	10.4279	1.88183	10.3433	1.24241	0.0218888	0	1	0	0.00384069	0	0	0.351817	0.78752	0.24079	0.305757	0	0	0	0	0	0	0	8.60665
Rmx-A180	0.0616037	0.0956164	0	0	0	0	0	12.0314	0	0.0871773	0	0	0	0	1.63864	1.03271	0.172087	0	0.00271455	0	0.518621	12.1886	0.0871773	0	0	2.15726	12.2758	2.15726	12.1186	1.73426	0.0616037	0	0.992898	0	0	0	0	0.240407	1.20751	0.172087	0.142513	0.0157743	0	0	0	0	0	0	12.8591
RRS-10	0	0	0	0	0	0	0	7.81119	0	0	0	0	0	0	0.868938	0.752149	0.098478	0	0	0	0.657144	7.81119	0	0	0	1.52608	7.81119	1.52608	7.81119	0.868938	0	0	1	0	0	0	0	0.430609	0.850627	0.098478	0.115771	0	0	0	0	0	0	0	5.4475
RRS-7	0.00854714	0.0359917	0	0	0	0	0	5.35667	0	0	0.0489588	0	0	0	0.595288	0.645547	0.120864	0	0.014668	0.0381783	0.332897	5.45017	0	0	0.0381783	0.928185	5.45017	0.966363	5.35667	0.63128	0.00854714	0	1	0.0411322	0.00898299	0	1	0.358654	0.781079	0.120864	0.15474	0.121359	0	0.0666189	0	0	0	0	6.28387
Se-0	0	0.27806	0	0	0	0	1.12588	0	0	0	0.406669	0	0	3.09932	0.412711	0.591955	0.191591	0	0	0	0.251646	0.684728	4.2252	0	0	0.664357	4.90993	0.664357	0	1.81666	0	0	0.139458	0	0.593912	0.504753	0	0.378781	0.783547	0.191591	0.244518	0	0	0.370084	0	0	2.06974	0	0
Shahdara	0	0	0	0	0	0	0	2.40273	0	6.14027	0	0.0572526	0	0	0.498273	0.697011	0.17124	0	0.0323216	0.0110059	0.200209	2.40273	6.14027	0	0.0682586	0.698482	8.54299	0.766741	8.54299	0.555526	0	0	0.281251	0.0977241	0	0	0.161239	0.286635	0.900573	0.17124	0.190146	0.18875	0	0	0	0	0	0	2.75949
Sorbo	0	0	0	0	0	0	0	3.4068	0	14.7382	0	0.0493974	0.12927	0	1.26987	0.828813	0.313825	0	0	0.0120913	0.317472	3.4068	14.7382	0	0.0614887	1.58735	18.145	1.64883	18.145	1.31927	0	0	0.187754	0.0387368	0	0	0.196642	0.200002	1.14264	0.313825	0.27465	0	0	0.0435929	0	0	0	0	6.1101
Spr1-2	0	0.212488	0	0	0	0	0	6.89846	0	0	0	0	0	0	1.14535	0.350074	0.128102	0.0433562	0.0407784	0	0.248583	7.11095	0	0.0433562	0	1.39393	7.11095	1.39393	6.89846	1.35784	0	0	1	0	0	0	0	0.178332	0.518955	0.128102	0.246847	0.318327	0	0	0	0	0	0	4.88162
Spr1-6	0	0	0	0	0	0	0	4.08692	0	0	0	0	0	0	0.508251	0.315229	0.141593	0	0.00419848	0	0.361284	4.08692	0	0	0	0.869535	4.08692	0.869535	4.08692	0.508251	0	0	1	0	0	0	0	0.415491	0.46102	0.141593	0.30713	0.0296517	0	0	0	0	0	0	14.3941
Sq-1	0	0	0.146107	0	1.89877	6.28316	0	0.266114	0.0530448	5.94673	0	0.271529	0.254863	0	2.29529	0.943229	0.173949	0.0612438	0.014138	0.512958	0.584534	0.266114	14.1287	0.114289	0.784486	2.87983	14.3948	3.66431	14.5409	2.61987	0	8.18193	0.0184868	0.272407	0	0	0.653877	0.202975	1.13132	0.173949	0.153758	0.0812766	0	0	0.183255	2.39906	0	7.75426	0.424934
Sq-8	10.3074	6.62322	0	0	0	0	0.0872939	0	0	0	0.486205	0	0	0	1.16822	1.2746	0.142927	0.0388359	0	0.124947	0.504417	17.4168	0.0872939	0.0388359	0.124947	1.67264	17.5041	1.79758	0	7.87874	10.3074	0	0.995013	0.0747003	0.0279158	0	1	0.30157	1.41752	0.142927	0.100829	0	4.30267	2.54427	0	0	0	0	0
Tamm-2	0	0	0	0	0	0	0	13.8334	0	0.0648938	0	0	0	0	0.728201	0.833716	0.136586	0	0.013833	0.00649284	0.309576	13.8334	0.0648938	0	0.00649284	1.03778	13.8983	1.04427	13.8983	0.728201	0	0	0.995331	0.00625648	0	0	1	0.298307	0.984135	0.136586	0.138788	0.101277	0	0	0	0	0	0	30.4911
Tamm-27	0	0	0	0	0	0	0	10.5664	0	0.0265869	0	0	0	0	0.521641	0.507419	0.14418	0	0.0126735	0	0.29352	10.5664	0.0265869	0	0	0.815162	10.593	0.815162	10.593	0.521641	0	0	0.99749	0	0	0	0	0.360076	0.664273	0.14418	0.21705	0.0879001	0	0.0559555	0	0	0	0	19.2658
Ts-1	0	0	0	0	0	0	0.53179	0	0	0	0	0	0	1.36911	1.33077	0.578725	0.180139	0	0	0.191475	0.825259	0	1.9009	0	0.191475	2.15603	1.9009	2.34751	0	1.86256	0	0	0	0.0888089	0	0.246819	1	0.382767	0.758864	0.180139	0.23738	0	0	0	0	0	0.614967	0	0
Ts-5	0	0.0494494	0	0	0.863566	3.26247	0	0.614464	0	1.04116	0	0.088218	0	0.379837	0.990402	1.47669	0.233754	0	0.00429275	0.0605341	0.453951	0.663914	5.54703	0	0.148752	1.44435	6.21095	1.59311	5.78166	1.12807	0	4.12604	0.106894	0.102989	0	0	0.406946	0.314294	1.71473	0.233754	0.136321	0.0183644	0	0.0413075	0	1.18107	0	4.09006	1.0179
Tsu-1	6.79554	1.16674	0	0	0	0	0	0	0	0	0.16878	0	0	0	1.22231	1.34848	0.156219	0	0	0	0.40922	8.13106	0	0	0	1.63153	8.13106	1.63153	0	2.38905	6.79554	0	1	0	0.0207574	0	0	0.25082	1.5047	0.156219	0.103821	0	19.7715	0.562104	0	0	0.065322	0	0
Ull2-3	5.6553	0.412441	0	0	0	0	0	0.0120371	0	0	0.0541823	0	0	0	1.27808	1.61366	0.285147	0.0823291	0.0207718	0.0128773	0.715946	6.13396	0	0.0823291	0.0128773	1.99403	6.13396	2.00691	0.0120371	1.69052	5.6553	0	1	0.00645794	0.00883317	0	1	0.359045	1.91958	0.285147	0.148546	0.0728459	3.00178	0.18936	0	0	0	0	0
Ull2-5	0.0620447	0.042534	0	0	0	0	0	5.97782	0	0	0	0.0675422	0	0	0.75694	0.60507	0.200483	0.0501874	0.00525194	0.00783124	0.49487	6.08239	0	0.0501874	0.0753734	1.25181	6.08239	1.32718	5.97782	0.867016	0.0620447	0	1	0.0602116	0	0	0.103899	0.395323	0.810806	0.200483	0.247264	0.0261964	0	0	0	0	0	0	3.78983
Uod-1	9.38904	0.534112	0	0	0	0	0	0.0460981	0	0.0119745	0.0379788	0.0186947	0	0	1.02774	0.676932	0.193117	0	0	0.0148621	0.445893	10.0072	0.0119745	0	0.0335568	1.47363	10.0192	1.50719	0.0580726	1.58054	9.38904	0	0.998805	0.0227716	0.00379513	0	0.442895	0.302581	0.870049	0.193117	0.221962	0	4.47702	0.232471	0	0	0	0	0
Uod-7	0.0700889	0	0	0.0332993	0	0	0	8.99016	0	0.0485815	0	0	0.0174839	0	1.05682	1.18055	0.131917	0	0.0245744	0.0203096	0.589661	9.06025	0.0818809	0	0.0203096	1.64648	9.14213	1.66679	9.03874	1.05682	0.103388	0	0.991044	0.0123352	0	0	1	0.358135	1.33704	0.131917	0.0986635	0.186287	0	0	0	0	0	0	7.94581
Van-0	0.064469	0	0	0	0	0	0	6.7901	0.074106	0.112266	0.0593671	0.0415849	0	0	0.804306	0.517005	0.155219	0	0	0.31156	0.672668	6.91394	0.112266	0.074106	0.353145	1.47697	7.02621	1.83012	6.90237	0.919997	0.064469	0	0.984022	0.2391	0.00858657	0	0.882244	0.455436	0.672224	0.155219	0.230904	0	0	0	0	0	0	0	8.62209
Var2-1	0.0985176	0	0	0	0	0	0	6.58919	0	0	0	0	0	0	0.511158	0.661459	0.105658	0	0	0.0119855	0.514265	6.68771	0	0	0.0119855	1.02542	6.68771	1.03741	6.58919	0.511158	0.0985176	0	1	0.0116883	0	0	1	0.501515	0.767117	0.105658	0.137734	0	0	0	0	0	0	0	11.3069
Var2-6	0.175058	0	0	0	0	0	0	6.26579	0.0248206	0	0	0	0	0	0.773357	0.344888	0.0902434	0	0	0.0138317	0.585165	6.44085	0	0.0248206	0.0138317	1.35852	6.44085	1.37235	6.26579	0.798178	0.175058	0	1	0.0101814	0	0	1	0.430737	0.435132	0.0902434	0.207393	0	0	0	0	0	0	0	17.2932
Wa-1	0.00687035	5.77403	0	0	0	0	0	0.0393751	0	0	0.390787	0.0531177	0	0	3.53575	1.87049	0.359143	0	0.0588379	0.012877	1.06994	6.21106	0	0	0.0659947	4.60568	6.21106	4.67168	0.0393751	9.36289	0.00687035	0	1	0.014329	0.062918	0	0.195122	0.232308	2.28847	0.359143	0.156936	0.163829	0	0.510823	0	0	0	0	0
Ws-0	0.103136	0	0	0	0	0	0	8.7216	0.090102	0	0	0	0	0	1.07596	0.573067	0.0661744	0	0.00857925	0.225205	0.701191	8.82473	0	0.090102	0.225205	1.77715	8.82473	2.00235	8.7216	1.16606	0.103136	0	1	0.126723	0	0	1	0.394559	0.64782	0.0661744	0.102149	0.129646	25.3142	0.422966	0	0	0	0	0
Ws-2	0.0086495	10.7562	0	0	0	0.0645304	0	0	0	0	0.556409	0	0	0	1.06996	1.64944	0.193655	0	0	0.0398552	0.266046	11.3213	0.0645304	0	0.0398552	1.33601	11.3858	1.37587	0.0645304	11.8262	0.0086495	0.0645304	0.994332	0.0298315	0.0491472	0	1	0.199135	1.8431	0.193655	0.10507	0	0	0	0	0	0	0	13.7584
Wt-5	0.180892	0	0	0	0	0	0.55352	0	0	0	0	0	0	0.336736	0.249523	0.50355	0.140483	0	0	0	0.281255	0.180892	0.890256	0	0	0.530778	1.07115	0.530778	0	0.803043	0.180892	0	0.168877	0	0	14.5691	0	0.529892	0.644033	0.140483	0.21813	0	0	3.78219	0	0	0	0	0
Yo-0	0.201461	0	0	0	0	0	0	12.2607	0.223894	0	0.103456	0.0457904	0	0.0231131	1.15479	0.783975	0.171913	0	0	0	0.618639	12.5657	0.0231131	0.223894	0.0457904	1.77342	12.5888	1.81921	12.2607	1.42447	0.201461	0	0.998164	0.0258203	0.00823323	0	0	0.348839	0.955888	0.171913	0.179846	0	0.575492	0.0981705	0	0.0767723	2.53167	0	0
Zdr-1	8.52383	0.0567964	0	0	0	0	0	0.0336806	0	0	0.0350351	0.10494	0	0	1.57986	1.16628	0.14807	0.0338551	0.0321964	0	0.599995	8.64934	0	0.0338551	0.10494	2.17985	8.64934	2.28479	0.0336806	1.74159	8.52383	0	1	0.0481407	0.0040506	0	0	0.275246	1.34655	0.14807	0.109963	0.21744	0	0	0	0	0	0.0247832	12.4287
Zdr-6	11.58	0	0	0	0	0	0	0.032662	0	0	0	0	0	0	0.791007	0.627367	0.183252	0.0466391	0.0287386	0	0.420976	11.6127	0	0.0466391	0	1.21198	11.6127	1.21198	0.032662	0.791007	11.58	0	1	0	0	0	0	0.347345	0.839357	0.183252	0.218324	0.156825	6.69061	0	0	0	0	0	0
																																											8.41959	0	0	0	0	0	0
[truncated: 34 more columns]

## Sheet: TABLE S3 (2)
	3-hydroxypropyl (2008)	3-methylsulfinylpropyl (2008)	Unknown Alkenyl (2008)	(S)2-hydroxy-but-3-enyl (2008)	4-methylsulfinylbutyl (2008)	(R)2-hydroxy-but-3-enyl (2008)	Alllyl (2008)	5-methylsulfinylpentyl (2008)	But-3-enyl (2008)	3-methylthiopropyl (2008)	4-hydroxy-indol-3-ylmethyl (2008)	7-methylsulfinylheptyl (2008)	4-methylthiobutyl (2008)	Pent-4-enyl (2008)	8-methylsulfinyloctyl (2008)	Indol-3-ylmethyl (2008)	4-methoxy-indol-3-ylmethyl (2008)	N-methoxy-indol-3-ylmethyl (2008)	7-methylthioheptyl (2008)	8-methylthiooctyl (2008)	Total C3 Aliphatic (2008)	Total C4 Aliphatic (2008)	Total C5 Aliphatic (2008)	Total C7 Aliphatic (2008)	Total C8 Aliphatic (2008)	Total C3 and C4 Aliphatic (2008)	Total C7 and C8 Aliphatic (2008)	Total Alkenyl Aliphatic (2008)	Total Methylsulfinyl Aliphatic (2008)	Total Hydroxyalkyl Aliphatic (2008)	Total Hydroxyalkenyl Aliphatic (2008)	Ratio of C3 to SC Aliphatic (2008)	Ratio of C7 to LC Aliphatic (2008)	Ratio of C3 methylthio to total C3 (2008)	Ratio of C4 methylthio to total C4 (2008)	Ratio of C7 methylthio to total C7 (2008)	Ratio of C8 methylthio to total C8 (2008)	Total Indolic Glucosinolate (2008)	Total Indolic Glucosinolate with 4 hydroxylation (2008)	Ratio of TOH4 to TIND (2008)	Ratio of NMOI3M to TIND (2008)
Ag-0	0	0.0829799	0.237462	2.34091	0	7.31514	1.66869	0	5.08952	0	0	0.112286	0	1.12184	0.907987	1.72713	0.221739	0.0596772	0.103666	0.576272	1.75167	14.7456	0	0.215952	1.48426	16.4972	1.70021	16.6517	1.10325	0	9.65605	0.10618	0.127015	0	0	0.480043	0.388255	2.00855	0.221739	0.110397	0.110397
An-1	0	0	0	1.62493	0	5.23564	1.38941	0	0.546651	0	0	0.265277	0	0	1.4754	1.1619	0.303475	0.0066545	0.147292	0.262137	1.38941	7.40722	0	0.412569	1.73754	8.79663	2.15011	8.79663	1.74068	0	6.86057	0.157947	0.191883	0	0	0.357012	0.150867	1.47203	0.303475	0.206162	0.206162
Bay-0	5.85966	0.00527833	0	0	0	0	0	0	0	0	0.0167865	0.0364823	0	0	0.772426	0.431367	0.418557	0.0359992	0.0299258	0.296978	5.86494	0	0	0.0664081	1.0694	5.86494	1.13581	0	0.814186	5.85966	0	1	0.0584676	0	0	0.450635	0.277704	0.90271	0.435344	0.482263	0.463668
Bil-5	0	0	0	0	0	0	14.1275	0	0.0377438	0.0683818	0.0230632	0.0424505	0	0	1.64004	0.917439	0.64183	0.0362777	0.0839299	0.992528	14.1959	0.0377438	0	0.12638	2.63256	14.2336	2.75894	14.1652	1.68249	0	0	0.997348	0.0458076	0.00481702	0	0.664105	0.377019	1.61861	0.664893	0.41078	0.396532
Bil-7	0	0	0	0	0	0	12.7072	0	0.0371978	0	0.0338125	0.0392429	0	0	1.51122	0.686598	0.614358	0.0327093	0.0730699	0.915511	12.7072	0.0371978	0	0.112313	2.42673	12.7444	2.53904	12.7444	1.55046	0	0	0.997081	0.0442343	0	0	0.650593	0.377261	1.36748	0.648171	0.47399	0.449264
Bor-1	6.98157	0.0627543	0	0	0	0	0	0	0	0	0	0	0	0	0.637543	0.472649	0.342047	0.0276081	0.0153768	0.45665	7.04433	0	0	0.0153768	1.09419	7.04433	1.10957	0	0.700297	6.98157	0	1	0.0138583	0	0	1	0.417339	0.842304	0.342047	0.406085	0.406085
Bor-4	4.2443	0	0	0	0	0	0	0	0	0	0	0	0	0	0.406275	0.74942	0.291428	0.00521961	0	0.29029	4.2443	0	0	0	0.696566	4.2443	0.696566	0	0.406275	4.2443	0	1	0	0	0	0	0.416745	1.04607	0.291428	0.278594	0.278594
Br-0	0	0.0418726	0.11911	1.751	0	5.73986	1.00152	0	4.61759	0	0	0.0883864	0	0.040325	0.81245	1.53348	0.302922	0.0116925	0.125422	0.392332	1.04339	12.1085	0	0.213808	1.20478	13.1519	1.41859	13.2291	0.942709	0	7.49087	0.0793342	0.150719	0	0	0.586609	0.325646	1.8481	0.302922	0.16391	0.16391
Bur-0	0	0	0	0.906583	0	2.81655	5.71964	0	10.3661	0	0	0.286069	0	0.150649	2.2538	1.0618	0.203317	0.0226306	0.121367	0.39736	5.71964	14.0893	0	0.407437	2.65116	19.8089	3.0586	19.8089	2.53987	0	3.72313	0.288741	0.13321	0	0	0.29788	0.149882	1.28775	0.203317	0.157886	0.157886
C24	0.148397	0.178917	0	0	0	0.0216331	0.809889	0	8.58955	0.661407	0.0752912	0.366313	0	0.75953	2.98667	0.497043	0.334022	0.0230299	0.344528	1.10218	1.79861	8.61118	0	0.710841	4.08885	10.4098	4.79969	9.42107	3.5319	0.148397	0.0216331	0.172781	0.148102	0.367732	0	0.484676	0.269558	0.929386	0.409314	0.440413	0.359401
CIBC-17	0	0	0	0	0	0	9.42693	0	0	0	0	0	0	0	1.21249	1.2691	0.17141	0.0189557	0	0.336318	9.42693	0	0	0	1.5488	9.42693	1.5488	9.42693	1.21249	0	0	1	0	0	0	0	0.217147	1.45947	0.17141	0.117447	0.117447
CIBC-5	0	0	0.145855	1.74639	0	5.65165	0.396967	0.0677987	2.06449	0	0	0.299064	0	0.0497448	1.45865	1.66996	0.348242	0.026815	0.223463	0.388447	0.396967	9.46253	0.0677987	0.522527	1.8471	9.8595	2.36962	10.0054	1.82551	0	7.39804	0.0402624	0.22051	0	0	0.427659	0.210301	2.04501	0.348242	0.170288	0.170288
Col-0	0	0.293212	0.0159125	0	1.58515	0	0	0.0265888	0	0	0	0	0.0876747	0	0.136872	0.840991	0.243941	0.00827021	0	0.0380834	0.293212	1.67282	0.0265888	0	0.174955	1.96604	0.174955	0.0159125	2.04182	0	0	0.149139	0	0	0.0524112	0	0.217675	1.0932	0.243941	0.223144	0.223144
CS22491	0	0	0	0	0	0	7.18148	0	0	0	0	0	0	0	0.223566	0.238842	0.0832851	0.00791742	0	0.079989	7.18148	0	0	0	0.303555	7.18148	0.303555	7.18148	0.223566	0	0	1	0	0	0	0	0.263507	0.330044	0.0832851	0.252345	0.252345
Ct-1	3.92064	0	0	0	0	0	0	0	0	0	0	0	0	0	0.196953	0.908162	0.0919852	0	0	0.180449	3.92064	0	0	0	0.377402	3.92064	0.377402	0	0.196953	3.92064	0	1	0	0	0	0	0.478135	1.00015	0.0919852	0.0919716	0.0919716
Cvi-0
Eden-1	0	0	0	0	0	0	4.69703	0	0	0	0	0	0	0	0.60986	0.782979	0.32378	0.0174286	0.0335032	0.467089	4.69703	0	0	0.0335032	1.07695	4.69703	1.11045	4.69703	0.60986	0	0	1	0.0301708	0	0	1	0.433715	1.12419	0.32378	0.288012	0.288012
Eden-2	0	0.0472597	0	0	0	0	7.39174	0	0.0916332	0	0.00819149	0.0269859	0	0	1.11716	0.882303	0.397536	0.0397202	0.0419064	0.588191	7.439	0.0916332	0	0.0688923	1.70535	7.53064	1.77425	7.48338	1.19141	0	0	0.987832	0.0388291	0	0	0.608288	0.344909	1.32775	0.405727	0.305575	0.299406
Edi-0	0	0.0662528	0	0	0	0	13.5621	0	0	0.27061	0.0155855	0	0	0	1.36338	1.20106	0.121425	0.0193878	0	0.513081	13.899	0	0	0	1.87646	13.899	1.87646	13.5621	1.42963	0	0	1	0	0.0194698	0	0	0.273431	1.35746	0.13701	0.100931	0.08945
Ei-2	0	0.0854684	0	0	0	0	8.22722	0	0	0	0	0	0	0	1.26022	0.828938	0.3556	0.00413011	0	0.679729	8.31269	0	0	0	1.93994	8.31269	1.93994	8.22722	1.34568	0	0	1	0	0	0	0	0.350386	1.18867	0.3556	0.299159	0.299159
Est-1	0	0	0	0	1.07312	0	0	0	0	0	0	0	0.424328	0	0.699799	1.21438	0.40861	0.0103702	0.0168431	0.134011	0	1.49745	0	0.0168431	0.833809	1.49745	0.850652	0	1.77292	0	0	0	0.0198002	0	0.283367	1	0.160721	1.63336	0.40861	0.250166	0.250166
Fab-2	0	0.0452045	0	0	0	0	10.7487	0	0.171734	0	0.0261542	0.0359174	0	0	1.25299	0.268443	0.341872	0.0142747	0.0197191	0.282144	10.7939	0.171734	0	0.0556365	1.53513	10.9657	1.59077	10.9205	1.33411	0	0	0.984339	0.0349747	0	0	0.354428	0.183791	0.650744	0.368026	0.565547	0.525356
Fab-4	0	0	0	0	0	0	6.90836	0	0.0391777	0	0	0	0	0	0.463187	0.401393	0.212166	0.0181892	0.0215129	0.424288	6.90836	0.0391777	0	0.0215129	0.887475	6.94754	0.908988	6.94754	0.463187	0	0	0.994361	0.0236669	0	0	1	0.478085	0.631748	0.212166	0.335839	0.335839
Fei-0	0	0	0.080961	1.50732	0	4.96582	1.41424	0	1.80498	0	0	0.255134	0	0.0328208	2.42513	0.915961	0.494523	0.0129072	0.158946	0.410876	1.41424	8.27811	0	0.41408	2.836	9.69235	3.25008	9.77331	2.68026	0	6.47313	0.145913	0.127406	0	0	0.383854	0.144879	1.42339	0.494523	0.347426	0.347426
Ga-0	0	0.0641115	0	0.232094	0	0.757434	8.54167	0	4.42378	0	0	0.053785	0	0.10076	0.765405	1.03248	0.221659	0.019982	0.0498135	0.448186	8.60578	5.4133	0	0.103598	1.21359	14.0191	1.31719	13.955	0.883301	0	0.989528	0.613862	0.0786512	0	0	0.480832	0.369305	1.27412	0.221659	0.17397	0.17397
Got-22	0	0	0	0	0	0	10.4142	0	0.0528412	0	0	0	0	0	0.744678	1.11426	0.163074	0.017651	0.0196343	0.361782	10.4142	0.0528412	0	0.0196343	1.10646	10.4671	1.12609	10.4671	0.744678	0	0	0.994952	0.0174357	0	0	1	0.326972	1.29499	0.163074	0.125927	0.125927
Got-7	0	0	0	0	0	0	5.41047	0	0	0	0	0	0	0	0.289578	0.895571	0.151716	0.00673355	0	0.209277	5.41047	0	0	0	0.498855	5.41047	0.498855	5.41047	0.289578	0	0	1	0	0	0	0	0.419515	1.05402	0.151716	0.143941	0.143941
Gu-0	0	0.0539772	0	0	0.485401	0	0	0	0	0	0	0	0.309053	0	0.846754	0.289703	0.256621	0.00356485	0.0234243	0.304814	0.0539772	0.794453	0	0.0234243	1.15157	0.848431	1.17499	0	1.38613	0	0	0.0636201	0.0199357	0	0.389013	1	0.264695	0.549889	0.256621	0.466678	0.466678
Gy-0	0	0.0529762	0.15385	2.08343	0	6.60905	1.52911	0	1.85164	0	0	0.359368	0	0.0406212	2.29709	1.23981	0.244286	0.0167141	0.312017	0.46645	1.58209	10.5441	0	0.671385	2.76354	12.1262	3.43493	12.2271	2.70944	0	8.69248	0.130469	0.195458	0	0	0.464736	0.168787	1.50081	0.244286	0.16277	0.16277
HR-10	0	0.0366397	0.161276	1.76005	0	5.65622	1.0845	0.0805348	1.81758	0	0	0.0741087	0	0.029418	0.747168	0.812278	0.28642	0.012613	0.106802	0.33805	1.12114	9.23384	0.0805348	0.180911	1.08522	10.355	1.26613	10.4796	0.938451	0	7.41626	0.108271	0.142885	0	0	0.590357	0.311504	1.11131	0.28642	0.257732	0.257732
HR-5	0	0	0.202862	1.67469	0	5.26981	0.190749	0.045481	2.55432	0	0	0.0829922	0	0.0727964	0.785351	1.23991	0.20976	0.0145977	0.0704488	0.255416	0.190749	9.49881	0.045481	0.153441	1.04077	9.68956	1.19421	9.89242	0.913824	0	6.9445	0.019686	0.128488	0	0	0.459126	0.245411	1.46427	0.20976	0.143253	0.143253
Kas-2	0	0	0	0	0	0	2.35841	0	3.1321	0	0	0	0	0	0.0737358	0.533371	0.380913	0.0208228	0.0166722	0.216455	2.35841	3.1321	0	0.0166722	0.29019	5.49051	0.306863	5.49051	0.0737358	0	0	0.429543	0.054331	0	0	1	0.745906	0.935107	0.380913	0.407347	0.407347
Kin-0	0	0.192735	0.0651596	2.74091	0	9.05744	0.738287	0	3.09755	0	0	0.318247	0	0.658325	1.49279	1.31001	0.220394	0.0146249	0.427475	0.400576	0.931022	14.8959	0	0.745722	1.89336	15.8269	2.63909	15.6993	2.00377	0	11.7983	0.0588252	0.282568	0	0	0.573236	0.211569	1.54503	0.220394	0.142647	0.142647
Knox-10	0	0	0	0	0	0	4.18249	0	0	0	0.00171339	0	0	0	0.282504	0.517011	0.210742	0	0.0131539	0.31297	4.18249	0	0	0.0131539	0.595474	4.18249	0.608628	4.18249	0.282504	0	0	1	0.0216123	0	0	1	0.525582	0.729467	0.212456	0.291248	0.288899
Knox-18	0	0	0	0	0	0	12.2269	0	0	0	0	0	0	0	1.12276	0.948425	0.342416	0.0192423	0.0356639	0.648516	12.2269	0	0	0.0356639	1.77128	12.2269	1.80694	12.2269	1.12276	0	0	1	0.0197372	0	0	1	0.366129	1.31008	0.342416	0.26137	0.26137
Kondara	0	0	0	0	0	0	20.858	0	0.132041	0	0	0	0	0	1.19754	1.01615	0.208973	0.0110325	0	0.352396	20.858	0.132041	0	0	1.54993	20.99	1.54993	20.99	1.19754	0	0	0.993709	0	0	0	0	0.227362	1.23615	0.208973	0.169052	0.169052
Kz-1	0	0.0625457	0	0	0	0	11.9739	0	0.315734	0	0	0	0	0	1.69049	0.485065	0.220126	0.0183285	0.0465145	0.699815	12.0364	0.315734	0	0.0465145	2.39031	12.3522	2.43682	12.2896	1.75304	0	0	0.974439	0.0190882	0	0	1	0.292772	0.723519	0.220126	0.304243	0.304243
Kz-9	0	0	0	0	0	0	6.00374	0	0	0	0	0	0	0	0.735451	0.457133	0.117866	0.0190719	0	0.278449	6.00374	0	0	0	1.0139	6.00374	1.0139	6.00374	0.735451	0	0	1	0	0	0	0	0.274632	0.594071	0.117866	0.198404	0.198404
Ler-1	5.7892	0	0	0	0	0	0	0	0	0	0	0	0	0	0.400209	1.06469	0.260266	0.0277041	0	0.201425	5.7892	0	0	0	0.601634	5.7892	0.601634	0	0.400209	5.7892	0	1	0	0	0	0	0.334796	1.35266	0.260266	0.192411	0.192411
Ll-0	0	0	0	0	0.500295	0	0	0	0	0.0797183	0	0.0467996	1.4254	0	0.707805	0.723665	0.204431	0	0.0461724	0.319119	0.0797183	1.9257	0	0.092972	1.02692	2.00541	1.1199	0	1.2549	0	0	0.0397515	0.0830184	1	0.7402	0.496627	0.310752	0.928096	0.204431	0.220269	0.220269
Lov-1	0	0	0	0	0	0	9.12041	0	0.0779168	0	0.0207752	0	0	0	0.716279	0.44595	0.157661	0.0083799	0.0163942	0.4089	9.12041	0.0779168	0	0.0163942	1.12518	9.19833	1.14157	9.19833	0.716279	0	0	0.991529	0.014361	0	0	1	0.363409	0.632766	0.178436	0.281994	0.249162
Lov-5	0	0.126557	0	0	0	0	14.0899	0	0.235845	0.157755	0.0141393	0	0	0	1.26725	0.434555	0.231971	0.0262562	0.0218613	0.743695	14.3742	0.235845	0	0.0218613	2.01094	14.6101	2.03281	14.3257	1.39381	0	0	0.983857	0.0107543	0.0109749	0	1	0.369824	0.706922	0.24611	0.348143	0.328142
Lp2-2	8.4263	0.581027	0	0	0	0	0	0	0	0	0.00718313	0	0	0	0.801015	1.83801	0.155482	0.0193863	0.0169146	0.217734	9.00733	0	0	0.0169146	1.01875	9.00733	1.03566	0	1.38204	8.4263	0	1	0.0163321	0	0	1	0.213727	2.02006	0.162665	0.0805246	0.0769687
Lp2-6	13.0919	0.178249	0	0	0	0	0	0	0	0	0	0	0	0	0.62939	0.981486	0.397311	0.0216928	0	0.307037	13.2701	0	0	0	0.936427	13.2701	0.936427	0	0.807638	13.0919	0	1	0	0	0	0	0.327882	1.40049	0.397311	0.283694	0.283694
Lz-0	16.0425	0.0652086	0	0	0	0	0	0	0	0	0	0	0	0	1.10324	2.05174	0.397997	0.0260442	0.0426737	0.712339	16.1077	0	0	0.0426737	1.81558	16.1077	1.85825	0	1.16845	16.0425	0	1	0.0229644	0	0	1	0.392348	2.47578	0.397997	0.160756	0.160756
Mr-0	0	0.0766438	0	0	0	0	16.6963	0	0.421535	0	0	0.0182092	0	0	2.82389	0.476427	0.326048	0.00785327	0.0381033	0.653871	16.773	0.421535	0	0.0563125	3.47776	17.1945	3.53408	17.1178	2.91875	0	0	0.975484	0.0159341	0	0	0.676641	0.188015	0.810329	0.326048	0.402365	0.402365
Mrk-0	0	0	0	0	0	0	16.1292	0	0.0515529	0	0	0	0	0	2.02068	1.75725	0.150507	0.00566706	0	0.36952	16.1292	0.0515529	0	0	2.3902	16.1807	2.3902	16.1807	2.02068	0	0	0.996814	0	0	0	0	0.154598	1.91343	0.150507	0.0786583	0.0786583
Ms-0	0	0	0	0	0	0	12.5747	0	0.128284	0	0	0.0331504	0	0	1.94429	1.09478	0.273865	0.0262977	0.0194667	0.492149	12.5747	0.128284	0	0.0526171	2.43644	12.703	2.48906	12.703	1.97744	0	0	0.989901	0.0211394	0	0	0.36997	0.201995	1.39495	0.273865	0.196327	0.196327
Mt-0	0	0.0605894	0	0	0.712184	0	0	0	0	0	0.0335287	0	0.0923667	0	0.383522	1.0619	0.467163	0.0176492	0	0.0913825	0.0605894	0.804551	0	0	0.474904	0.865141	0.474904	0	1.1563	0	0	0.0700342	0	0	0.114805	0	0.192423	1.58024	0.500692	0.316845	0.295628
Mz-0	0	0.700841	0	0	3.18428	0	0	0	0.00719325	0	0.0232603	0	0.498561	0	0.636623	0.614944	0.268907	0.00633396	0	0.222685	0.700841	3.69004	0	0	0.859308	4.39088	0.859308	0.00719325	4.52175	0	0	0.159613	0	0	0.13511	0	0.259145	0.913446	0.292167	0.319852	0.294387
Nd-1	6.58705	0.0529679	0	0	0	0	0	0	0	0	0	0	0	0	0.11133	0.906274	0.0310014	0	0	0.0176847	6.64002	0	0	0	0.129015	6.64002	0.129015	0	0.164298	6.58705	0	1	0	0	0	0	0.137075	0.937276	0.0310014	0.0330761	0.0330761
NFA-10	0	0	0.222114	2.41335	0	7.8168	1.88112	0.0446736	2.97589	0	0	0.196663	0	0.657731	1.05603	0.97687	0.152426	0.0163238	0.105759	0.312334	1.88112	13.206	0.0446736	0.302421	1.36836	15.0872	1.67078	15.3093	1.29736	0	10.2302	0.124684	0.181006	0	0	0.349706	0.228254	1.14562	0.152426	0.133051	0.133051
NFA-8	0	0.14306	0.0150538	1.96913	0	6.24037	1.46426	0	2.89001	0	0	0.184673	0	0.975595	0.930775	0.897272	0.279375	0.00948624	0.0994978	0.208432	1.60732	11.0995	0	0.284171	1.13921	12.7068	1.42338	12.5788	1.25851	0	8.20949	0.126493	0.199645	0	0	0.350134	0.182962	1.18613	0.279375	0.235534	0.235534
Nok-3	0	0	0	0	0	0	3.09049	0	0	0	0	0	0	0	0.298996	0.593709	0.1489	0	0	0.240156	3.09049	0	0	0	0.539152	3.09049	0.539152	3.09049	0.298996	0	0	1	0	0	0	0	0.445433	0.742609	0.1489	0.20051	0.20051
Omo2-1	0	0.0817373	0	0	0	0	21.5305	0	0.180329	0	0.00760348	0.0311038	0	0	0.708481	1.24134	0.15093	0.0171213	0.0283645	0.262671	21.6122	0.180329	0	0.0594683	0.971152	21.7925	1.03062	21.7108	0.821322	0	0	0.991725	0.0577014	0	0	0.476968	0.270474	1.41699	0.158534	0.111881	0.106515
Omo2-3	0	0	0	0	0	0	6.8524	0	0	0	0	0	0	0	0.823848	0.903431	0.224118	0.00607671	0.0119064	0.313469	6.8524	0	0	0.0119064	1.13732	6.8524	1.14922	6.8524	0.823848	0	0	1	0.0103604	0	0	1	0.275622	1.13363	0.224118	0.1977	0.1977
Oy-0	0	4.41934	0	0	0	0	0	0	0	0.0139724	0	0	0	0	0.850023	0.844148	0.248863	0.00625326	0	0.338163	4.43332	0	0	0	1.18819	4.43332	1.18819	0	5.26937	0	0	1	0	0.00315168	0	0	0.284604	1.09926	0.248863	0.226391	0.226391
Pna-10	0	0	0	0	0	0	6.34442	0	0	0	0	0	0	0	0.721596	0.537747	0.226686	0	0.0130797	0.399765	6.34442	0	0	0.0130797	1.12136	6.34442	1.13444	6.34442	0.721596	0	0	1	0.0115297	0	0	1	0.3565	0.764433	0.226686	0.296541	0.296541
Pna-17	0	0	0	0	0	0	3.47036	0	0	0	0	0	0	0	0.290959	0.669842	0.202714	0.00718491	0	0.19736	3.47036	0	0	0	0.48832	3.47036	0.48832	3.47036	0.290959	0	0	1	0	0	0	0	0.404162	0.879741	0.202714	0.230424	0.230424
Pro-0	0	0	0	0.807463	0	2.71276	1.53307	0	9.55584	0	0	0.130512	0	2.40034	0.92811	0.648922	0.169692	0.0202134	0.0835729	0.207157	1.53307	13.0761	0	0.214085	1.13527	14.6091	1.34935	14.6091	1.05862	0	3.52023	0.104939	0.158657	0	0	0.390373	0.182474	0.838827	0.169692	0.202296	0.202296
Pu2-23	0	0	0	0	0	0	13.8825	0	0.168306	0	0.0152285	0.0558142	0	0	2.59958	1.63677	0.193114	0.0362945	0.0531249	0.697785	13.8825	0.168306	0	0.108939	3.29737	14.0508	3.40631	14.0508	2.6554	0	0	0.988022	0.0319816	0	0	0.487657	0.211619	1.8814	0.208343	0.110738	0.102644
Pu2-7	0	0	0	0	0	0	4.27108	0	0	0	0	0	0	0	0.268515	1.10103	0.515914	0.0138133	0.0242401	0.324286	4.27108	0	0	0.0242401	0.592801	4.27108	0.617041	4.27108	0.268515	0	0	1	0.0392845	0	0	1	0.54704	1.63076	0.515914	0.316365	0.316365
Ra-0	8.8063	0.773586	0	0	0	0	0	0	0	0	0.0200094	0	0	0	0.740001	2.58318	0.442426	0.0233748	0	0.30684	9.57988	0	0	0	1.04684	9.57988	1.04684	0	1.51359	8.8063	0	1	0	0	0	0	0.29311	3.06899	0.462436	0.15068	0.14416
Ren-1	0	0.0599864	0.102931	1.67048	0	5.62414	0	0	0.90404	0	0	0.0737062	0.775197	0	1.59696	1.03893	0.233867	0.0176794	0.113612	0.483536	0.0599864	8.97386	0	0.187318	2.0805	9.03384	2.26782	8.30159	1.73065	0	7.29462	0.00664019	0.0825985	0	0.086384	0.606519	0.232414	1.29047	0.233867	0.181226	0.181226
Ren-11	0	0	0.0927321	1.3154	0	4.35842	0	0	0.732503	0	0	0.0161956	0	0	0.254394	0.87391	0.133326	0.00408726	0.0321119	0.170345	0	6.40632	0	0.0483076	0.424739	6.40632	0.473047	6.49905	0.270589	0	5.67382	0	0.10212	0	0	0.664739	0.401059	1.01132	0.133326	0.131834	0.131834
Rmx-A02	0	0	0	0	0	0	8.60665	0	0	0	0.0171728	0	0	0	0.752475	0.614561	0.34328	0.00363181	0.013041	0.44227	8.60665	0	0	0.013041	1.19474	8.60665	1.20779	8.60665	0.752475	0	0	1	0.0107975	0	0	1	0.370179	0.978646	0.360453	0.368318	0.350771
Rmx-A180	0	0	0	0	0	0	12.8591	0	0	0	0	0	0	0	1.15272	1.44749	0.228747	0.00784046	0	0.355104	12.8591	0	0	0	1.50782	12.8591	1.50782	12.8591	1.15272	0	0	1	0	0	0	0	0.235507	1.68407	0.228747	0.13583	0.13583
RRS-10	0	0	0	0	0	0	5.4475	0	0	0	0	0	0	0	0.536617	0.500067	0.185289	0	0	0.361814	5.4475	0	0	0	0.898432	5.4475	0.898432	5.4475	0.536617	0	0	1	0	0	0	0	0.402718	0.685357	0.185289	0.270355	0.270355
RRS-7	0	0.0666189	0	0	0	0	6.28387	0	0	0	0	0	0	0	0.549394	0.865479	0.120331	0.0303273	0	0.373543	6.35049	0	0	0	0.922937	6.35049	0.922937	6.28387	0.616013	0	0	1	0	0	0	0	0.404733	1.01614	0.120331	0.11842	0.11842
Se-0	0	0.370084	0	0	2.06974	0	0	0	0	0.630655	0	0.048747	5.24987	0	0.37148	0.608529	0.313165	0.00528253	0.0592756	0.216387	1.00074	7.31961	0	0.108023	0.587867	8.32035	0.69589	0	2.86005	0	0	0.120276	0.15523	0.630189	0.717233	0.548733	0.368088	0.926976	0.313165	0.337835	0.337835
Shahdara	0	0	0	0	0	0	2.75949	0	7.09271	0	0	0.0643065	0	0	0.729537	0.685062	0.14295	0.0316186	0.0150936	0.0767729	2.75949	7.09271	0	0.0794002	0.80631	9.85221	0.88571	9.85221	0.793844	0	0	0.280089	0.0896457	0	0	0.190095	0.0952151	0.859631	0.14295	0.166292	0.166292
Sorbo	0	0.0435929	0	0	0	0	6.1101	0	23.2591	0	0	0.0462527	0	2.07893	1.48299	1.12963	0.333087	0	0.0213509	0.257135	6.1537	23.2591	0	0.0676035	1.74013	29.4128	1.80773	29.3692	1.57284	0	0	0.209218	0.0373969	0	0	0.315825	0.147768	1.46271	0.333087	0.227719	0.227719
Spr1-2	0	0	0	0	0	0	4.88162	0	0	0	0	0.0141164	0	0	0.582749	0.750216	0.314066	0.0212815	0.017146	0.174292	4.88162	0	0	0.0312623	0.757041	4.88162	0.788304	4.88162	0.596865	0	0	1	0.0396578	0	0	0.548455	0.230228	1.08556	0.314066	0.289311	0.289311
Spr1-6	0	0	0	0	0	0	14.3941	0	0.0367951	0	0.00328749	0.0288261	0	0	2.28915	0.568359	0.310298	0.0308354	0.0330096	0.819152	14.3941	0.0367951	0	0.0618357	3.1083	14.4309	3.17014	14.4309	2.31797	0	0	0.99745	0.0195057	0	0	0.533828	0.263537	0.912779	0.313585	0.34355	0.339948
Sq-1	0	0	0.183255	2.39906	0	7.75426	0.424934	0.0757163	3.3153	0	0	0.242389	0	0.857946	1.53165	1.02436	0.270882	0.0205612	0.122538	0.416956	0.424934	13.4686	0.0757163	0.364927	1.9486	13.8935	2.31353	14.0768	1.84975	0	10.1533	0.030585	0.157736	0	0	0.335787	0.213977	1.31581	0.270882	0.205868	0.205868
Sq-8	4.30267	2.54427	0	0	0	0	0	0	0	0	0	0	0	0	0.450176	0.689779	0.308077	0.00412289	0	0.340735	6.84694	0	0	0	0.790911	6.84694	0.790911	0	2.99445	4.30267	0	1	0	0	0	0	0.430814	1.00198	0.308077	0.307468	0.307468
Tamm-2	0	0	0	0	0	0	30.4911	0	0.397782	0	0	0.0185191	0	0	1.60181	1.30692	0.181234	0.0270329	0	0.277242	30.4911	0.397782	0	0.0185191	1.87905	30.8889	1.89757	30.8889	1.62033	0	0	0.987122	0.00975939	0	0	0	0.147544	1.51519	0.181234	0.119612	0.119612
Tamm-27	0	0.0559555	0	0	0	0	19.2658	0	0.299583	0	0	0.0296336	0	0	1.34475	0.966128	0.194232	0.023858	0.0225954	0.337885	19.3217	0.299583	0	0.052229	1.68263	19.6213	1.73486	19.5653	1.43034	0	0	0.984732	0.0301056	0	0	0.432622	0.200808	1.18422	0.194232	0.164017	0.164017
Ts-1	0	0	0	0	0.614967	0	0	0	0	0.0167881	0	0.0304231	1.44623	0	0.605482	0.971313	0.138691	0.00539289	0.0427378	0.376748	0.0167881	2.06119	0	0.0731609	0.98223	2.07798	1.05539	0	1.25087	0	0	0.00807906	0.0693212	1	0.701645	0.584162	0.383564	1.1154	0.138691	0.124343	0.124343
Ts-5	0	0.0413075	0	1.18107	0	4.09006	1.0179	0	2.8322	0	0	0.0991352	0.736302	0	1.38011	1.64673	0.19495	0.015486	0.0930622	0.42011	1.05921	8.83963	0	0.192197	1.80022	9.89883	1.99242	9.12123	1.52056	0	5.27113	0.107003	0.0964643	0	0.0832955	0.484201	0.233366	1.85716	0.19495	0.104972	0.104972
Tsu-1	19.7715	0.562104	0	0	0.065322	0	0	0	0	0	0.0259755	0.0397047	0	0	2.07094	1.63878	0.35765	0.00728616	0.046999	0.561599	20.3336	0.065322	0	0.0867036	2.63254	20.3989	2.71924	0	2.73807	19.7715	0	0.996798	0.0318852	0	0	0.542065	0.21333	2.02969	0.383625	0.189007	0.176209
Ull2-3	3.00178	0.18936	0	0	0	0	0	0	0	0	0.0136014	0	0	0	0.770972	1.06413	0.301245	0.0100239	0	0.406366	3.19114	0	0	0	1.17734	3.19114	1.17734	0	0.960332	3.00178	0	1	0	0	0	0	0.345157	1.389	0.314847	0.226671	0.216879
Ull2-5	0	0	0	0	0	0	3.78983	0	0	0	0	0	0	0	0.404407	0.490305	0.157693	0.00414044	0.011001	0.26694	3.78983	0	0	0.011001	0.671347	3.78983	0.682348	3.78983	0.404407	0	0	1	0.0161223	0	0	1	0.397618	0.652139	0.157693	0.241809	0.241809
Uod-1	4.47702	0.232471	0	0	0	0	0	0	0	0	0	0	0	0	0.29778	0.708197	0.114191	0.00561092	0	0.25042	4.70949	0	0	0	0.548199	4.70949	0.548199	0	0.530251	4.47702	0	1	0	0	0	0	0.456804	0.827999	0.114191	0.137912	0.137912
Uod-7	0	0	0	0	0	0	7.94581	0	0	0	0	0.0203233	0	0	0.759681	1.19225	0.103801	0.0277702	0.0192781	0.278764	7.94581	0	0	0.0396014	1.03845	7.94581	1.07805	7.94581	0.780004	0	0	1	0.0367344	0	0	0.486803	0.268444	1.32382	0.103801	0.0784099	0.0784099
Van-0	0	0	0	0	0	0	8.62209	0	0.0479896	0	0	0	0	0	0.751386	0.877567	0.306549	0.00521856	0.0162893	0.470196	8.62209	0.0479896	0	0.0162893	1.22158	8.67008	1.23787	8.67008	0.751386	0	0	0.994465	0.0131591	0	0	1	0.384907	1.18933	0.306549	0.257748	0.257748
Var2-1	0	0	0	0	0	0	11.3069	0	0.0508427	0	0	0.0240019	0	0	1.24935	1.01685	0.135792	0.0045967	0.0490327	0.626964	11.3069	0.0508427	0	0.0730346	1.87632	11.3577	1.94935	11.3577	1.27336	0	0	0.995524	0.0374661	0	0	0.671363	0.334146	1.15724	0.135792	0.117341	0.117341
Var2-6	0	0	0	0	0	0	17.2932	0	0.21285	0	0	0.0891526	0	0	1.68595	0.728214	0.23999	0.0120811	0.0830133	0.628586	17.2932	0.21285	0	0.172166	2.31454	17.5061	2.4867	17.5061	1.7751	0	0	0.987841	0.0692346	0	0	0.48217	0.271582	0.980286	0.23999	0.244816	0.244816
Wa-1	0	0.510823	0	0	0	0	0	0	0	0	0	0	0	0	0.0694232	0.562765	0.279128	0.0162205	0	0.161418	0.510823	0	0	0	0.230841	0.510823	0.230841	0	0.580246	0	0	1	0	0	0	0	0.69926	0.858113	0.279128	0.325281	0.325281
Wei-0	25.3142	0.422966	0	0	0	0	0	0	0	0	0	0	0	0	2.09568	1.3335	0.274071	0.0040523	0.0118736	0.41635	25.7371	0	0	0.0118736	2.51203	25.7371	2.52391	0	2.51865	25.3142	0	1	0.00470444	0	0	1	0.165742	1.61163	0.274071	0.170059	0.170059
Ws-0	0	0	0	0	0	0	13.7584	0	0.0842264	0	0	0	0	0	1.32859	0.6585	0.127902	0.00978852	0	0.540911	13.7584	0.0842264	0	0	1.8695	13.8426	1.8695	13.8426	1.32859	0	0	0.993915	0	0	0	0	0.289335	0.796191	0.127902	0.160643	0.160643
Ws-2	0	3.78219	0	0	0	0	0	0	0	0	0	0	0	0	0.126179	1.31062	0.118269	0	0	0.0220925	3.78219	0	0	0	0.148272	3.78219	0.148272	0	3.90837	0	0	1	0	0	0	0	0.149	1.42889	0.118269	0.0827696	0.0827696
Wt-5	0.575492	0.0981705	0	0.0767723	2.53167	0	0	0	0	0	0	0	0.387746	0	0.676617	0.797591	0.155177	0.00381969	0	0.146118	0.673662	2.99619	0	0	0.822735	3.66985	0.822735	0.0767723	3.30646	0.575492	0.0767723	0.183567	0	0	0.129413	0	0.1776	0.956588	0.155177	0.16222	0.16222
Yo-0	0	0	0	0	0	0.0247832	12.4287	0	0.0267102	0	0.00349616	0	0	0	0.510534	1.20557	0.16061	0.00974575	0	0.315922	12.4287	0.0514935	0	0	0.826457	12.4802	0.826457	12.4802	0.510534	0	0.0247832	0.995874	0	0	0	0	0.382261	1.37942	0.164106	0.118968	0.116433
Zdr-1	6.69061	0	0	0	0	0	0	0	0	0	0.0138576	0	0	0	0.741478	1.14385	0.0929073	0.0252693	0	0.270757	6.69061	0	0	0	1.01224	6.69061	1.01224	0	0.741478	6.69061	0	1	0	0	0	0	0.267484	1.27588	0.106765	0.0836793	0.0728181
Zdr-6	8.41959	0	0	0	0	0	0	0	0	0	0	0	0	0	0.663751	0.439984	0.334053	0.0256132	0.0133846	0.419905	8.41959	0	0	0.0133846	1.08366	8.41959	1.09704	0	0.663751	8.41959	0	1	0.0122006	0	0	1	0.38749	0.79965	0.334053	0.417749	0.417749
