# Supplementary material for: Understanding the Evolution of Defense Metabolites in Arabidopsis thaliana Using Genome-wide Association Mapping
Source: Oxford University Press journal article supplement (doi:10.1534/genetics.109.108522), 2009-09-09
Supplement: tables4.xls [file tables4.xls]

## Sheet: TABLE S4
TABLE S4
Correlation of Glucosinolate phenotypes.
Shown are the significant spearman rank correlations for all glucosinolate phenotypes used in this study.
	3-hydroxypropyl (2007)	3-methylsulfinylpropyl (2007)	Unknown Alkenyl (2007)	4-hydroxybutyl (2007)	(S)2-hydroxy-but-3-enyl (2007)	(R)2-hydroxy-but-3-enyl (2007)	4-methylsulfinylbutyl (2007)	Allyl (2007)	5-methylsulfinylpentyl (2007)	But-3-enyl (2007)	3-methylthiopropyl (2007)	7-methylsulfinylheptyl (2007)	Pent-4-enyl (2007)	4-methylthiobutyl (2007)	8-methylsulfinyloctyl (2007)	Indol-3-ylmethyl (2007)	4-methoxy-indol-3-ylmethyl (2007)	5-methylthiopentyl (2007)	N-methoxy-indol-3-ylmethyl (2007)	7-methylthioheptyl (2007)	8-methylthiooctyl (2007)	Total C3 Aliphatic (2007)	Total C4 Aliphatic (2007)	Total C5 Aliphatic (2007)	Total C7 Aliphatic (2007)	Total C8 Aliphatic (2007)	Total C3 and C4 Aliphatic (2007)	Total C7 and C8 Aliphatic (2007)	Total Alkenyl Aliphatic (2007)	Total Methylsulfinyl Aliphatic (2007)	Total Hydroxyalkyl Aliphatic (2007)	Total Hydroxyalkenyl Aliphatic (2007)	Ratio of C3 to SC Aliphatic (2007)	Ratio of C7 to LC Aliphatic (2007)	Ratio of C3 methylthio to total C3 (2007)	Ratio of C4 methylthio to total C4 (2007)	Ratio of C7 methylthio to total C7 (2007)	Ratio of C8 methylthio to total C8 (2007)	Total Indolic Glucosinolate (2007)	Total Indolic Glucosinolate with 4 hydroxylation (2007)	Ratio of TOH4 to TIND (2007)	Ratio of NMOI3M to TIND (2007)	3-hydroxypropyl (2008)	3-methylsulfinylpropyl (2008)	Unknown Alkenyl (2008)	(S)2-hydroxy-but-3-enyl (2008)	4-methylsulfinylbutyl (2008)	(R)2-hydroxy-but-3-enyl (2008)	Alllyl (2008)
3-hydroxypropyl (2007)	1
3-methylsulfinylpropyl (2007)		1
Unknown Alkenyl (2007)			1
4-hydroxybutyl (2007)				1
(S)2-hydroxy-but-3-enyl (2007)			0.895172		1
(R)2-hydroxy-but-3-enyl (2007)			0.891309		0.999066	1
4-methylsulfinylbutyl (2007)							1
Allyl (2007)	-0.424399				-0.333113	-0.334943		1
5-methylsulfinylpentyl (2007)							0.590507		1
But-3-enyl (2007)										1
3-methylthiopropyl (2007)		0.590309									1
7-methylsulfinylheptyl (2007)			0.687778		0.680555	0.672372				0.393776		1
Pent-4-enyl (2007)			0.73921		0.766233	0.753369				0.531675		0.693181	1
4-methylthiobutyl (2007)							0.604269							1
8-methylsulfinyloctyl (2007)											0.384047	0.561321	0.371605		1
Indol-3-ylmethyl (2007)	0.340005	0.395405														1
4-methoxy-indol-3-ylmethyl (2007)										0.40857					0.328904		1
5-methylthiopentyl (2007)																	0.326097	1
N-methoxy-indol-3-ylmethyl (2007)																			1
7-methylthioheptyl (2007)			0.444251		0.539545	0.545551						0.469224	0.42399		0.342579					1
8-methylthiooctyl (2007)											0.302755				0.573516		0.3132		0.300618	0.359832	1
Total C3 Aliphatic (2007)			-0.433954		-0.528843	-0.53194	-0.305601	0.701124				-0.375393	-0.415739	-0.37268						-0.31589		1
Total C4 Aliphatic (2007)			0.6789		0.741843	0.742574		-0.33977		0.829176		0.624886	0.772125				0.352013			0.429091		-0.57765	1
Total C5 Aliphatic (2007)							0.489909		0.889179									0.331908						1
Total C7 Aliphatic (2007)			0.635704		0.696062	0.69607				0.336525		0.805792	0.624771		0.505416					0.901055	0.312464	-0.396203	0.59465		1
Total C8 Aliphatic (2007)											0.396949	0.495198			0.972258		0.355348		0.319414	0.379719	0.749224				0.497848	1
Total C3 and C4 Aliphatic (2007)								0.42279		0.549876			0.352857	-0.359362	0.340199		0.301302					0.504612	0.413247			0.325064	1
Total C7 and C8 Aliphatic (2007)			0.315246		0.335238	0.332837					0.387536	0.601513	0.376748		0.961272		0.34299			0.519031	0.725042				0.643485	0.984213	0.325057	1
Total Alkenyl Aliphatic (2007)	-0.54982		0.307575		0.3076	0.306542	-0.31402	0.657036		0.545472			0.375935	-0.334566									0.469836				0.747145	0.311711	1
Total Methylsulfinyl Aliphatic (2007)		0.86239					0.353038				0.700929				0.422432	0.372728										0.374284		0.353465		1
Total Hydroxyalkyl Aliphatic (2007)	0.999993							-0.424578								0.340042													-0.550128		1
Total Hydroxyalkenyl Aliphatic (2007)			0.892343		0.999445	0.999951		-0.334578				0.674361	0.756446							0.544262		-0.531317	0.742529		0.696183			0.333443	0.306835			1
Ratio of C3 to SC Aliphatic (2007)			-0.542806		-0.659354	-0.664381	-0.331367	0.520561		-0.500082		-0.492601	-0.555074	-0.412715						-0.421939		0.809924	-0.800968		-0.524885							-0.663337	1
Ratio of C7 to LC Aliphatic (2007)			0.611597		0.716147	0.717702						0.662624	0.546319							0.847706		-0.427484	0.551579		0.89391			0.373571				0.717464	-0.541906	1
Ratio of C3 methylthio to total C3 (2007)							0.483482				0.605582			0.624501																0.301173					1
Ratio of C4 methylthio to total C4 (2007)							0.735518		0.495335					0.462207										0.407881												1
Ratio of C7 methylthio to total C7 (2007)																				0.356837	0.305472																1
Ratio of C8 methylthio to total C8 (2007)					-0.340606	-0.334282						-0.453255	-0.411929		-0.540632						0.311681		-0.324654			-0.348104		-0.359273		-0.368894		-0.335789	0.319215				0.317892	1
Total Indolic Glucosinolate (2007)	0.302339	0.381095														0.962198	0.343089		0.364737											0.412949	0.302396								1
Total Indolic Glucosinolate with 4 hydroxylation (2007)										0.40857					0.328904		1	0.326097			0.3132		0.352013			0.355348	0.301302	0.34299											0.343089	1
Ratio of TOH4 to TIND (2007)																-0.603274	0.682789																						-0.384213	0.682789	1
Ratio of NMOI3M to TIND (2007)																			0.84675																							1
3-hydroxypropyl (2008)	0.598707																												-0.34946		0.598544												1
3-methylsulfinylpropyl (2008)		0.356491																																		0.352179								1
Unknown Alkenyl (2008)			0.745201		0.796033	0.796217		-0.300889				0.463592	0.556888							0.539054		-0.466459	0.576556		0.589278							0.796307	-0.568009	0.653292											1
(S)2-hydroxy-but-3-enyl (2008)			0.843264		0.96871	0.970982		-0.34174		0.317301		0.61589	0.711221							0.556716		-0.546408	0.736496		0.675907							0.970621	-0.681877	0.73785				-0.306644							0.847306	1
4-methylsulfinylbutyl (2008)							0.794476		0.610639					0.679948										0.501352											0.483457	0.547456											1
(R)2-hydroxy-but-3-enyl (2008)			0.838146		0.967275	0.970033		-0.344714		0.315961		0.614401	0.704037							0.558169		-0.549349	0.735173		0.676151							0.96956	-0.684088	0.738086				-0.308749							0.841413	0.999607		1
Alllyl (2008)	-0.327641							0.735768														0.547646	-0.337039						0.42543		-0.327866		0.471888										-0.320486						1
5-methylsulfinylpentyl (2008)			0.628322		0.56832	0.557619						0.484514	0.547426							0.318389		-0.325596	0.439868		0.451508							0.560168	-0.394375	0.430309											0.682747	0.525727		0.522137
But-3-enyl (2008)										0.816079		0.358399	0.531159										0.668576				0.384443		0.413406				-0.440238
3-methylthiopropyl (2008)											0.623093			0.483768																					0.72214
4-hydroxy-indol-3-ylmethyl (2008)											0.593786				0.397613		0.378755				0.411774					0.439753		0.429592							0.484952					0.378755	0.442228
7-methylsulfinylheptyl (2008)			0.669989		0.737363	0.732522				0.44367		0.816001	0.691439		0.437348					0.546262		-0.477429	0.691856		0.767151	0.372724		0.486378	0.312695			0.733755	-0.601311	0.68379				-0.384426							0.519843	0.744477		0.743856
4-methylthiobutyl (2008)														0.902517																			-0.300935		0.597083												0.513512
Pent-4-enyl (2008)			0.382875		0.327015	0.327504				0.701048		0.320363	0.534657										0.639705				0.366965		0.373595			0.327446	-0.391125													0.37041		0.369285
8-methylsulfinyloctyl (2008)												0.334289			0.38367										0.358163	0.357471		0.388813																					0.369515
Indol-3-ylmethyl (2008)																0.588825																							0.517949		-0.497632		0.313259
4-methoxy-indol-3-ylmethyl (2008)																	0.605369	0.414963																						0.605369	0.467336
N-methoxy-indol-3-ylmethyl (2008)																			0.434592
7-methylthioheptyl (2008)			0.600506		0.649567	0.650829				0.335908		0.692864	0.523077		0.340599					0.52294		-0.454125	0.574333		0.691042	0.313879		0.418846				0.650647	-0.548013	0.64734											0.488874	0.704355		0.707623
8-methylthiooctyl (2008)																					0.505393					0.334406		0.336699									0.335263				0.348974								0.369282
Total C3 Aliphatic (2008)			-0.333564		-0.408693	-0.411425		0.553875				-0.317862	-0.322948									0.65608	-0.479674		-0.310472							-0.410866	0.630923	-0.313622									0.357501		-0.354406	-0.422846		-0.422903	0.764895
Total C4 Aliphatic (2008)			0.627268		0.740232	0.742578		-0.335994		0.693047		0.587471	0.756048							0.44489		-0.57499	0.890053		0.58693				0.392639			0.742162	-0.766398	0.584158				-0.362971							0.630264	0.781299		0.78065
Total C5 Aliphatic (2008)			0.628322		0.56832	0.557619						0.484514	0.547426							0.318389		-0.325596	0.439868		0.451508							0.560168	-0.394375	0.430309											0.682747	0.525727		0.522137
Total C7 Aliphatic (2008)			0.653237		0.713652	0.71154				0.40382		0.777663	0.629139		0.402479					0.548125		-0.477697	0.653241		0.749576	0.354001		0.466257				0.712142	-0.590496	0.682742				-0.332654							0.517512	0.743107		0.744282
Total C8 Aliphatic (2008)															0.370828										0.34235	0.374717		0.400765																					0.393454
Total C3 and C4 Aliphatic (2008)								0.31388																			0.475864		0.48712																				0.568081
Total C7 and C8 Aliphatic (2008)												0.403998			0.404822					0.360141					0.439985	0.399832		0.442987						0.314039															0.321184
Total Alkenyl Aliphatic (2008)	-0.458278							0.461143		0.33977			0.331276	-0.302573									0.309455				0.474302		0.698625		-0.458623												-0.426279				-0.302377		0.735454
Total Methylsulfinyl Aliphatic (2008)							0.349877				0.410076																			0.338672					0.323246	0.400732								0.593089			0.419563
Total Hydroxyalkyl Aliphatic (2008)	0.598707																												-0.34946		0.598544												1						-0.320486
Total Hydroxyalkenyl Aliphatic (2008)			0.839413		0.967682	0.970326		-0.344036		0.3163		0.614796	0.705782							0.557866		-0.548694	0.735538		0.676141							0.969879	-0.683615	0.738083				-0.308274							0.842863	0.99977		0.999978
Ratio of C3 to SC Aliphatic (2008)	0.304186		-0.529066		-0.653454	-0.658487	-0.330002	0.459529		-0.475714		-0.497013	-0.544084	-0.406914						-0.418018		0.748224	-0.777391		-0.524485						0.303988	-0.657441	0.951372	-0.538854				0.37746							-0.560397	-0.677722	-0.382718	-0.677686	0.454963
Ratio of C7 to LC Aliphatic (2008)			0.75162		0.834732	0.832672		-0.306242		0.460971		0.702907	0.677346							0.488291		-0.573582	0.7769		0.672727			0.322844	0.338725			0.833283	-0.725329	0.675541				-0.303754							0.626463	0.84922		0.850071
Ratio of C3 methylthio to total C3 (2008)														0.709837																			-0.31986		0.327486
Ratio of C4 methylthio to total C4 (2008)							0.347653							0.881042								-0.347782					-0.374656		-0.300947				-0.401084		0.376123	0.303931											0.50148
Ratio of C7 methylthio to total C7 (2008)
Ratio of C8 methylthio to total C8 (2008)													-0.302926								0.435419																	0.483889
Total Indolic Glucosinolate (2008)																0.552548																							0.532717		-0.332334		0.337024
Total Indolic Glucosinolate with 4 hydroxylation (2008)																	0.618244	0.40952																						0.618244	0.491137
Ratio of TOH4 to TIND (2008)											0.323517					-0.423855	0.516714				0.321984					0.328467														0.516714	0.735015
Ratio of NMOI3M to TIND (2008)																-0.419828	0.50201																							0.50201	0.71232
[truncated: 34 more columns]

## Sheet: TABLE S4 (2)
Accession	3-hydroxypropyl (2007)	3-methylsulfinylpropyl (2007)	Unknown Alkenyl (2007)	4-hydroxybutyl (2007)	(S)2-hydroxy-but-3-enyl (2007)	(R)2-hydroxy-but-3-enyl (2007)	4-methylsulfinylbutyl (2007)	Allyl (2007)	5-methylsulfinylpentyl (2007)	But-3-enyl (2007)	3-methylthiopropyl (2007)	7-methylsulfinylheptyl (2007)	Pent-4-enyl (2007)	4-methylthiobutyl (2007)	8-methylsulfinyloctyl (2007)	Indol-3-ylmethyl (2007)	4-methoxy-indol-3-ylmethyl (2007)	5-methylthiopentyl (2007)	N-methoxy-indol-3-ylmethyl (2007)	7-methylthioheptyl (2007)	8-methylthiooctyl (2007)	Total C3 Aliphatic (2007)	Total C4 Aliphatic (2007)	Total C5 Aliphatic (2007)	Total C7 Aliphatic (2007)	Total C8 Aliphatic (2007)	Total C3 and C4 Aliphatic (2007)	Total C7 and C8 Aliphatic (2007)	Total Alkenyl Aliphatic (2007)	Total Methylsulfinyl Aliphatic (2007)	Total Hydroxyalkyl Aliphatic (2007)	Total Hydroxyalkenyl Aliphatic (2007)	Ratio of C3 to SC Aliphatic (2007)	Ratio of C7 to LC Aliphatic (2007)	Ratio of C3 methylthio to total C3 (2007)	Ratio of C4 methylthio to total C4 (2007)	Ratio of C7 methylthio to total C7 (2007)	Ratio of C8 methylthio to total C8 (2007)	Total Indolic Glucosinolate (2007)	Total Indolic Glucosinolate with 4 hydroxylation (2007)	Ratio of TOH4 to TIND (2007)	Ratio of NMOI3M to TIND (2007)	3-hydroxypropyl (2008)	3-methylsulfinylpropyl (2008)	Unknown Alkenyl (2008)	(S)2-hydroxy-but-3-enyl (2008)	4-methylsulfinylbutyl (2008)	(R)2-hydroxy-but-3-enyl (2008)	Alllyl (2008)
Ag-0	0.111083	0	0.145551	0	1.35727	4.78894	0	1.18816	0	3.56206	0	0.039543	0.0733919	0	0.800819	0.927011	0.208465	0.0578568	0.0468073	0.146553	0.65176	1.29924	9.70827	0.0578568	0.186096	1.45258	11.0075	1.63867	11.042	0.840362	0.111083	6.14621	0.118033	0.128114	0	0	0.787513	0.448691	1.18228	0.208465	0.176324	0.224534	0	0.0829799	0.237462	2.34091	0	7.31514	1.66869
An-1	0.116905	0	0.0787616	0	1.51655	5.07921	0	1.33898	0	1.92915	0	0.221038	0.0316963	0.0261548	1.54317	1.26768	0.185002	0	0.0361216	0.155164	0.581922	1.45589	8.55107	0	0.376203	2.12509	10.007	2.5013	9.94266	1.76421	0.116905	6.59576	0.145488	0.177029	0	0.842106	0.412449	0.273833	1.48881	0.185002	0.124262	0.19525	0	0	0	1.62493	0	5.23564	1.38941
Bay-0	5.95706	0.168696	0	0	0	0	0	0.0647138	0.0592152	0	0.0871703	0.0453841	0	0.0310588	1.94612	0.465234	0.372661	0	0.0386874	0.121369	0.801997	6.27764	0.0310588	0.0592152	0.166753	2.74812	6.3087	2.91487	0.0647138	2.21941	5.95706	0	0.995077	0.060679	0.0138859	0.68458	0.727836	0.291835	0.876583	0.372661	0.425129	0.103814	5.85966	0.00527833	0	0	0	0	0
Bil-5	0	0	0	0	0	0	0	8.53654	0	0.0453692	0.083234	0	0	0	1.09155	0.599459	0.597034	0.132011	0.0151245	0.0339687	0.68342	8.61978	0.0453692	0.132011	0.0339687	1.77497	8.66515	1.80894	8.58191	1.09155	0	0	0.994764	0.0191376	0.00965617	0	1	0.385032	1.21162	0.597034	0.492758	0.0253328	0	0	0	0	0	0	14.1275
Bil-7	0	0	0	0	0	0	0	10.5647	0	0	0.0677067	0.0491374	0	0	1.53536	0.7158	0.491199	0.156462	0.0193574	0.0475774	0.676281	10.6324	0	0.156462	0.0967148	2.21164	10.6324	2.30835	10.5647	1.5845	0	0	1	0.0437299	0.00636794	0	0.491935	0.305783	1.22636	0.491199	0.400535	0.0394085	0	0	0	0	0	0	12.7072
Bor-1	7.98604	0.0681461	0	0	0	0	0	0	0	0.128921	0	0	0	0	0.824973	0.77979	0.173782	0.1618	0.0337476	0.0060175	0.583309	8.05419	0.128921	0.1618	0.0060175	1.40828	8.18311	1.4143	0.128921	0.893119	7.98604	0	0.984246	0.00427294	0	0	1	0.414199	0.98732	0.173782	0.176014	0.194194	6.98157	0.0627543	0	0	0	0	0
Bor-4	8.0699	0	0	0	0	0	0	0	0	0	0	0	0	0	1.27459	0.853864	0.181743	0.0846562	0.00657986	0	0.589311	8.0699	0	0.0846562	0	1.8639	8.0699	1.8639	0	1.27459	8.0699	0	1	0	0	0	0	0.31617	1.04219	0.181743	0.174386	0.0362042	4.2443	0	0	0	0	0	0
Br-0	0.0945455	0	0	0	1.02102	3.24331	0	0.604411	0.0459391	3.26667	0	0.0734953	0.0811254	0	1.50613	1.3581	0.15443	0.113967	0.00517925	0.0956305	0.677599	0.698956	7.53099	0.159906	0.169126	2.18373	8.22995	2.35285	8.1354	1.62556	0.0945455	4.26433	0.0849284	0.0774481	0	0	0.56544	0.310295	1.5177	0.15443	0.101752	0.0335379	0	0.0418726	0.11911	1.751	0	5.73986	1.00152
Bur-0	0	0	0	0	0.858266	2.80907	0	4.63413	0	7.81319	0	0.260385	0.208837	0	2.5547	0.985474	0.266753	0.0407813	0.0488006	0.123778	0.564172	4.63413	11.4805	0.0407813	0.384163	3.11887	16.1147	3.50303	16.1147	2.81508	0	3.66734	0.287572	0.123174	0	0	0.322203	0.18089	1.30103	0.266753	0.205032	0.182943	0	0	0	0.906583	0	2.81655	5.71964
C24	0.15896	0.221678	0.0327873	0	0.0488805	0.242279	0	0.942462	0	9.23298	0.940226	0.413178	0.0552187	0	3.84888	0.348311	0.404798	0	0.033416	0.457104	1.52082	2.26333	9.52414	0	0.870281	5.3697	11.7875	6.23998	10.4994	4.48374	0.15896	0.29116	0.192011	0.162073	0.415418	0	0.525237	0.283222	0.786525	0.404798	0.514666	0.0825499	0.148397	0.178917	0	0	0	0.0216331	0.809889
CIBC-17	0.0203896	0	0	0	0	0	0	9.82172	0.0570363	0	0	0.0231791	0	0	1.6693	1.27866	0.188324	0	0.0730181	0.0937979	0.681331	9.84211	0	0.0570363	0.116977	2.35063	9.84211	2.46761	9.82172	1.74951	0.0203896	0	1	0.0497641	0	0	0.801849	0.289851	1.54001	0.188324	0.122288	0.387727	0	0	0	0	0	0	9.42693
CIBC-5	0.0112128	0	0.190904	0	1.66906	5.49701	0	0.188292	0.0316778	2.96584	0	0.368333	0.133105	0	1.80667	0.963655	0.158635	0.0597929	0.0183599	0.102821	0.288951	0.199504	10.1319	0.0914707	0.471154	2.09562	10.3314	2.56677	10.5111	2.20668	0.0112128	7.16607	0.0193105	0.224828	0	0	0.218232	0.137883	1.14065	0.158635	0.139074	0.115736	0	0	0.145855	1.74639	0	5.65165	0.396967
Col-0	0.116246	0.487775	0	0.0700649	0	0	2.66377	0	0.10097	0.0545019	0.0657092	0.0630126	0.0387211	0.77618	0.57695	0.812638	0.244967	0	0.0245602	0	0.175115	0.66973	3.56452	0.10097	0.0630126	0.752065	4.23425	0.815078	0.0545019	3.89248	0.186311	0	0.15817	0.0837861	0.098113	6.02595	0	0.232846	1.08216	0.244967	0.226367	0.100259	0	0.293212	0.0159125	0	1.58515	0	0
CS22491	0.127522	0	0	0	0	0.0999641	0.028842	9.04925	0	0	0.0189478	0	0	0	0.449897	0.332058	0.080393	0	0.0274747	0.0281065	0.273289	9.19572	0.128806	0	0.0281065	0.723186	9.32453	0.751293	9.14922	0.478739	0.127522	0.0999641	0.986186	0.0388649	0.00206051	0	1	0.377896	0.439925	0.080393	0.182742	0.341755	0	0	0	0	0	0	7.18148
Ct-1	9.53491	0.139884	0	0	0	0	0	0.140514	0.155995	0	0	0	0	0	1.03688	1.27316	0.110752	0	0.06035	0	0.515418	9.81531	0	0.155995	0	1.55229	9.81531	1.55229	0.140514	1.33276	9.53491	0	1	0	0	0	0	0.332036	1.44426	0.110752	0.0766843	0.544912	3.92064	0	0	0	0	0	0
Cvi-0	0.123541	0	0.0206087	0	0	0	0	3.54349	0	7.51432	0	0.0132469	0.0248266	0	0.464963	0.244609	0.0934729	0	0	0.0370124	0.280606	3.66703	7.51432	0	0.0502593	0.745569	11.1814	0.795828	11.0784	0.47821	0.123541	0	0.32796	0.0674106	0	0	0.736429	0.376365	0.338082	0.0934729	0.27648	0
Eden-1	0	0	0	0	0	0	0	10.3299	0	0.0910839	0	0	0	0	1.14317	0.56189	0.37069	0.0682408	0.015738	0.0264328	0.886104	10.3299	0.0910839	0.0682408	0.0264328	2.02928	10.421	2.05571	10.421	1.14317	0	0	0.99126	0.0130258	0	0	1	0.43666	0.948318	0.37069	0.390892	0.0424561	0	0	0	0	0	0	4.69703
Eden-2	0	0	0	0	0	0	0	9.30102	0	0.0666668	0.0145161	0.170572	0	0	1.22348	0.53815	0.274028	0.0828517	0.0108094	0	0.65187	9.31554	0.0666668	0.0828517	0.170572	1.87535	9.3822	2.04592	9.36769	1.39405	0	0	0.992894	0.0909548	0.00155827	0	0	0.347599	0.822988	0.274028	0.332967	0.0394464	0	0.0472597	0	0	0	0	7.39174
Edi-0	0	0.120105	0	0	0	0	0	9.4491	0	0	0.20997	0	0	0	1.48617	0.907073	0.12146	0	0.0168093	0.0230238	0.602141	9.77918	0	0	0.0230238	2.08831	9.77918	2.11133	9.4491	1.60627	0	0	1	0.0110251	0.0214711	0	1	0.288339	1.04534	0.12146	0.116192	0.138394	0	0.0662528	0	0	0	0	13.5621
Ei-2	0.0402561	0.0439481	0	0	0.029025	0.0217482	0	9.52748	0	0.0244829	0.0475839	0.024053	0	0	1.8363	0.730296	0.160917	0.0211737	0.0209352	0.0224321	0.920128	9.65927	0.0752561	0.0211737	0.0464851	2.75643	9.73452	2.80291	9.60274	1.9043	0.0402561	0.0507732	0.992269	0.0168643	0.00492624	0	0.482565	0.333812	0.912148	0.160917	0.176415	0.1301	0	0.0854684	0	0	0	0	8.22722
Est-1	0.182995	0.135403	0	0	0	0	1.05536	0	0.0726813	0	0.00640215	0	0	0.628841	0.850251	0.802212	0.128865	0	0	0	0.129138	0.3248	1.68421	0.0726813	0	0.979389	2.00901	0.979389	0	2.1137	0.182995	0	0.161672	0	0.0197111	2.13542	0	0.131856	0.931077	0.128865	0.138404	0	0	0	0	0	1.07312	0	0
Fab-2	0.010239	0.186297	0	0	0	0	0	16.4177	0	0.294482	0.407814	0.0737727	0	0	2.64202	0.250575	0.255474	0.0458391	0.00983318	0.0205404	0.795348	17.0221	0.294482	0.0458391	0.0943131	3.43737	17.3165	3.53168	16.7122	2.90209	0.010239	0	0.982994	0.0274376	0.023958	0	0.21779	0.231383	0.515883	0.255474	0.495218	0.0384899	0	0.0452045	0	0	0	0	10.7487
Fab-4	0	0.0793179	0	0	0	0	0	12.2493	0	0.20663	0	0	0	0	1.36885	0.450332	0.216097	0.0568051	0.0138223	0.421085	0.940902	12.3287	0.20663	0.0568051	0.421085	2.30975	12.5353	2.73084	12.456	1.44817	0	0	0.983516	0.182308	0	0	1	0.407361	0.680251	0.216097	0.317673	0.0639635	0	0	0	0	0	0	6.90836
Fei-0	0	0	0.0412439	0	1.27824	4.22549	0	1.10051	0	1.85387	0	0.188561	0.0356759	0	2.17028	0.821563	0.308943	0	0	0.101073	0.374935	1.10051	7.3576	0	0.289634	2.54522	8.45811	2.83485	8.49935	2.35884	0	5.50373	0.130114	0.113795	0	0	0.348969	0.14731	1.13051	0.308943	0.273278	0	0	0	0.080961	1.50732	0	4.96582	1.41424
Ga-0	0.277248	0.0481054	0	0	0.0300773	0.113987	0	11.6016	0.317265	0.0758279	0	0	0	0	1.3937	1.16595	0.163117	0	0.0661166	0.00814526	0.791997	11.9269	0.219892	0.317265	0.00814526	2.1857	12.1468	2.19384	11.8215	1.75907	0.277248	0.144064	0.981897	0.00372662	0	0	1	0.362354	1.39519	0.163117	0.116914	0.405333	0	0.0641115	0	0.232094	0	0.757434	8.54167
Got-22	0	0	0	0	0	0	0	6.80757	0	0	0	0	0	0	0.774598	0.694242	0.129066	0	0.00675985	0	0.531814	6.80757	0	0	0	1.30641	6.80757	1.30641	6.80757	0.774598	0	0	1	0	0	0	0	0.40708	0.830067	0.129066	0.155488	0.0523753	0	0	0	0	0	0	10.4142
Got-7	0.0613905	0	0	0	0	0.0175573	0	5.97051	0	0	0	0	0	0	0.637908	0.656829	0.130071	0	0.00872378	0	0.530684	6.0319	0.0175573	0	0	1.16859	6.04945	1.16859	5.98806	0.637908	0.0613905	0.0175573	0.997098	0	0	0	0	0.454122	0.795624	0.130071	0.163483	0.0670694	0	0	0	0	0	0	5.41047
Gu-0	0	0.160812	0	0	0	0	0.720568	0	0	0.0355439	0	0.0580987	0.0295839	0.670843	1.22392	0.594707	0.242072	0	0.0253857	0	0.3905	0.160812	1.42696	0	0.0580987	1.61442	1.58777	1.67252	0.0355439	2.1634	0	0	0.101282	0.0359874	0	0.107921	0	0.241883	0.862165	0.242072	0.280772	0.104869	0	0.0539772	0	0	0.485401	0	0
Gy-0	0.295004	0.0863748	0.0379472	0	1.22047	3.96129	0	0.962448	0.0725112	1.03431	0.0326047	0.13765	0.091996	0	1.057	0.888111	0.283036	0	0	0.440855	0.398438	1.37643	6.21607	0.0725112	0.578505	1.45544	7.5925	2.03395	7.21646	1.35354	0.295004	5.18176	0.181288	0.397477	0.0236879	0	0.76206	0.273757	1.17115	0.283036	0.241674	0	0	0.0529762	0.15385	2.08343	0	6.60905	1.52911
HR-10	0	0.0504693	0.084503	0	1.41692	4.63973	0	0.944923	0	2.41188	0	0.117273	0.0919842	0	1.12919	0.67083	0.264012	0.077733	0.0133038	0.106874	0.451781	0.995393	8.46853	0.077733	0.224146	1.58098	9.46392	1.80512	9.49795	1.29694	0	6.05665	0.105178	0.141777	0	0	0.476803	0.285761	0.948146	0.264012	0.278451	0.050391	0	0.0366397	0.161276	1.76005	0	5.65622	1.0845
HR-5	0	0	0.0707596	0	1.44017	4.92166	0	0.23771	0.107901	3.21795	0	0.121127	0.0782593	0	1.42586	0.9781	0.278593	0.0666669	0.0124057	0.11524	0.526195	0.23771	9.57978	0.174568	0.236368	1.95205	9.81749	2.18842	9.88825	1.65488	0	6.36183	0.0242129	0.121087	0	0	0.487547	0.26956	1.2691	0.278593	0.219521	0.0445298	0	0	0.202862	1.67469	0	5.26981	0.190749
Kas-2	0	0.192443	0	0	0	0.130018	0	8.46118	0	16.7177	0	0	0	0	0.689051	0.843829	0.611518	0	0.0603296	0.0108463	0.674046	8.65363	16.8477	0	0.0108463	1.3631	25.5013	1.37394	25.3089	0.881494	0	0.130018	0.33934	0.00795712	0	0	1	0.494496	1.51568	0.611518	0.403462	0.0986555	0	0	0	0	0	0	2.35841
Kin-0	0.0317398	0	0.145971	0	1.81501	6.23013	0	0.635819	0	2.49912	0	0.202929	0.100722	0	1.20977	0.981127	0.224483	0	0.00650685	0.0858732	0.306597	0.667559	10.5443	0	0.288802	1.51637	11.2118	1.80517	11.326	1.4127	0.0317398	8.04514	0.0595407	0.190456	0	0	0.297342	0.202192	1.21212	0.224483	0.185199	0.0289859	0	0.192735	0.0651596	2.74091	0	9.05744	0.738287
Knox-10	0	0.0273506	0	0	0	0	0	8.06719	0.116968	0	0.0299229	0	0	0	0.985519	0.565821	0.093031	0	0	0	0.58582	8.12446	0	0.116968	0	1.57134	8.12446	1.57134	8.06719	1.12984	0	0	1	0	0.00368306	0	0	0.372816	0.658852	0.093031	0.141202	0	0	0	0	0	0	0	4.18249
Knox-18	0	0	0	0	0	0	0	8.68463	0.0914911	0	0	0	0	0	0.849249	0.550788	0.141292	0	0.0216747	0.00773645	0.582968	8.68463	0	0.0914911	0.00773645	1.43222	8.68463	1.43995	8.68463	0.94074	0	0	1	0.00540173	0	0	1	0.407039	0.713755	0.141292	0.197956	0.153404	0	0	0	0	0	0	12.2269
Kondara	0	0.0513068	0	0	0	0	0	22.6741	0	0.382275	0	0	0	0	2.09795	1.03576	0.279782	0	0.039939	0	0.531496	22.7255	0.382275	0	0	2.62945	23.1077	2.62945	23.0564	2.14926	0	0	0.983457	0	0	0	0	0.202132	1.35548	0.279782	0.206407	0.142751	0	0	0	0	0	0	20.858
Kz-1	0	0.0382066	0	0	0	0	0	8.32656	0	0.102995	0.0443299	0.036816	0	0	1.05224	0.316284	0.16055	0.0594373	0.0161997	0.0748254	0.664608	8.4091	0.102995	0.0594373	0.111641	1.71685	8.51209	1.82849	8.42956	1.12726	0	0	0.9879	0.065027	0.00527165	0	0.67023	0.387109	0.493034	0.16055	0.325637	0.100901	0	0.0625457	0	0	0	0	11.9739
Kz-9	0.0152009	0.0589302	0	0	0	0	0	6.0534	0	0.0399172	0	0	0	0	0.641895	0.354222	0.0990949	0.0462691	0.0147116	0	0.342897	6.12753	0.0399172	0.0462691	0	0.984793	6.16745	0.984793	6.09332	0.700826	0.0152009	0	0.993528	0	0	0	0	0.348192	0.468028	0.0990949	0.211728	0.14846	0	0	0	0	0	0	6.00374
Ler-1	9.16151	0.0606801	0	0.0950427	0	0	0.0402131	0	0	0.0407714	0.0263295	0.0366173	0.0455784	0	1.14383	0.999061	0.179819	0	0.043898	0	0.537209	9.24852	0.176027	0	0.0366173	1.68104	9.42455	1.71766	0.0407714	1.28134	9.25656	0	0.981322	0.0217825	0.00284689	0	0	0.31957	1.22278	0.179819	0.147058	0.244123	5.7892	0	0	0	0	0	0
Ll-0	0	0	0	0	0	0	0.705658	0	0	0	0	0	0	1.5495	0.831871	0.39439	0.183948	0	0	0	0.351849	0	2.25516	0	0	1.18372	2.25516	1.18372	0	1.53753	0	0	0	0	0	11.8047	0	0.29724	0.578338	0.183948	0.318064	0	0	0	0	0	0.500295	0	0
Lov-1	0	0.0289243	0	0	0	0	0	12.2029	0	0.131261	0	0.117202	0	0	1.31046	0.517809	0.178594	0.0405158	0.0150164	0	0.743623	12.2318	0.131261	0.0405158	0.117202	2.05408	12.3631	2.17128	12.3342	1.45658	0	0	0.989383	0.0570582	0	0	0	0.362022	0.711419	0.178594	0.251039	0.0840811	0	0	0	0	0	0	9.12041
Lov-5	0	0	0	0	0	0	0	10.1821	0.0028643	0.0634813	0	0	0	0	1.37866	0.519073	0.151708	0	0.0489813	0.0609329	0.65307	10.1821	0.0634813	0.0028643	0.0609329	2.03173	10.2456	2.09266	10.2456	1.38152	0	0	0.993804	0.0299907	0	0	1	0.321436	0.719761	0.151708	0.210775	0.322867	0	0.126557	0	0	0	0	14.0899
Lp2-2	5.90736	0.167995	0	0	0	0	0.124498	0	0	0	0	0.201082	0	0	1.12135	0.983506	0.122999	0	0.00666019	0.00476623	0.275974	6.07536	0.124498	0	0.205848	1.39732	6.19985	1.60317	0	1.61492	5.90736	0	0.979919	0.147316	0	0	0.0231541	0.197502	1.11317	0.122999	0.110495	0.0541481	8.4263	0.581027	0	0	0	0	0
Lp2-6	7.91387	0.411283	0	0	0	0	0.145534	0	0.101114	0	0.0425639	0	0	0	0.831653	0.66667	0.221473	0.0359049	0.0102483	0	0.342239	8.36772	0.145534	0.137019	0	1.17389	8.51325	1.17389	0	1.48958	7.91387	0	0.982905	0	0.00508668	0	0	0.291542	0.898391	0.221473	0.246522	0.0462734	13.0919	0.178249	0	0	0	0	0
Lz-0	9.7904	0.0644983	0	0	0	0	0	0.188464	0	0.0296698	0.0251369	0	0	0	0.886146	1.87602	0.315123	0.067881	0.0258266	0.173446	0.904428	10.0685	0.0296698	0.067881	0.173446	1.79057	10.0982	1.96402	0.218134	0.950645	9.7904	0	0.997062	0.096866	0.00249659	0	1	0.505105	2.21697	0.315123	0.142141	0.081957	16.0425	0.0652086	0	0	0	0	0
Mr-0	0	0	0	0	0	0.158186	0	11.9923	0	0.247117	0	0	0	0	2.23929	0.321784	0.231178	0	0.00499305	0.00871246	0.621201	11.9923	0.405303	0	0.00871246	2.86049	12.3976	2.8692	12.3976	2.23929	0	0.158186	0.967308	0.0030458	0	0	1	0.217166	0.557955	0.231178	0.414331	0.0215983	0	0.0766438	0	0	0	0	16.6963
Mrk-0	0.132907	0	0	0	0	0	0	10.5963	0.189967	0	0	0	0	0	1.82648	1.23739	0.138224	0	0	0	0.518705	10.7292	0	0.189967	0	2.34519	10.7292	2.34519	10.5963	2.01645	0.132907	0	1	0	0	0	0	0.221178	1.37561	0.138224	0.100482	0	0	0	0	0	0	0	16.1292
Ms-0	0	0	0	0	0	0	0	6.9556	0	0	0	0	0	0	1.23793	0.994658	0.225601	0	0.0126617	0	0.363007	6.9556	0	0	0	1.60094	6.9556	1.60094	6.9556	1.23793	0	0	1	0	0	0	0	0.226746	1.23292	0.225601	0.182981	0.0561243	0	0	0	0	0	0	12.5747
Mt-0	0	0.137919	0	0	0	0	2.0701	0	0	0	0.139595	0.0284341	0	0.651728	1.33127	1.03209	0.225185	0	0.0176589	0	0.357701	0.277514	2.72183	0	0.0284341	1.68897	2.99934	1.7174	0	3.56772	0	0	0.092525	0.0168352	0.50302	0.10433	0	0.211787	1.27494	0.225185	0.176624	0.0784195	0	0.0605894	0	0	0.712184	0	0
Mz-0	0.311709	0.961896	0	0	0	0	4.88474	0	0.547593	0	0.316993	0	0	1.36208	1.05707	0.683121	0.443431	0	0.00476544	0.00871866	0.49124	1.5906	6.24682	0.547593	0.00871866	1.54831	7.83742	1.55703	0	7.45131	0.311709	0	0.202949	0.00563106	0.199292	19.2516	1	0.317274	1.13132	0.443431	0.39196	0.0107468	0	0.700841	0	0	3.18428	0	0
Nd-1	11.7593	0.303716	0	0	0	0	0.0326192	0.159708	0	0.0381323	0	0	0.0360108	0	0.695483	1.40593	0.0704747	0	0.020431	0.0487305	0.303363	12.2227	0.0707515	0	0.0487305	0.998845	12.2935	1.04758	0.19784	1.03182	11.7593	0	0.994245	0.0487869	0	0	1	0.303713	1.49683	0.0704747	0.0470826	0.289905	6.58705	0.0529679	0	0	0	0	0
NFA-10	0	0	0.176464	0	2.2025	7.27525	0	1.51737	0	3.59559	0	0.30088	0.1111	0	1.93739	0.744952	0.166744	0.0582135	0.0120911	0.340537	0.617788	1.51737	13.0733	0.0582135	0.641418	2.55518	14.5907	3.1966	14.7672	2.23827	0	9.47775	0.103996	0.251026	0	0	0.530914	0.241779	0.923787	0.166744	0.180501	0.0725126	0	0	0.222114	2.41335	0	7.8168	1.88112
NFA-8	0.00918859	0	0.184796	0	2.39132	7.89921	0	1.88664	0.0657906	6.10396	0	0.256238	0.256611	0	2.3795	1.07131	0.278987	0.0701349	0.0234761	0.135799	0.530932	1.89583	16.3945	0.135926	0.392037	2.91043	18.2903	3.30247	18.4659	2.70153	0.00918859	10.2905	0.103652	0.134701	0	0	0.346394	0.182424	1.37377	0.278987	0.203081	0.0841477	0	0.14306	0.0150538	1.96913	0	6.24037	1.46426
Nok-3	0	0	0	0	0	0	0	5.38147	0	0	0	0	0	0	0.761935	0.70081	0.14408	0.0163007	0	0	0.579926	5.38147	0	0.0163007	0	1.34186	5.38147	1.34186	5.38147	0.761935	0	0	1	0	0	0	0	0.43218	0.844889	0.14408	0.170531	0	0	0	0	0	0	0	3.09049
Omo2-1	0	0	0	0	0	0	0	14.3036	0	0.0811891	0	0.117475	0	0	0.927114	1.25864	0.13725	0.0365771	0.0304669	0.0224511	0.649222	14.3036	0.0811891	0.0365771	0.139926	1.57634	14.3848	1.71626	14.3848	1.04459	0	0	0.994356	0.0887665	0	0	0.16045	0.411855	1.42636	0.13725	0.0962242	0.221981	0	0.0817373	0	0	0	0	21.5305
Omo2-3	0	0.0376049	0	0	0	0	0	6.50913	0	0	0.106068	0	0	0	0.637759	0.835529	0.102092	0.0264736	0.00483555	0.0078798	0.309907	6.6528	0	0.0264736	0.0078798	0.947666	6.6528	0.955546	6.50913	0.675364	0	0	1	0.00831496	0.0159434	0	1	0.327021	0.942456	0.102092	0.108326	0.0473645	0	0	0	0	0	0	6.8524
Oy-0	0	3.5355	0	0	0	0	0	0	0	0	0.284591	0	0	0	0.677963	1.01277	0.242724	0.0353611	0	0.0256539	0.503536	3.82009	0	0.0353611	0.0256539	1.1815	3.82009	1.20715	0	4.21346	0	0	1	0.0217131	0.0744986	0	1	0.426184	1.25549	0.242724	0.19333	0	0	4.41934	0	0	0	0	0
Pna-10	0	0	0	0	0	0	0	8.65819	0	0	0.0537429	0	0	0	1.01263	0.577507	0.111067	0	0	0	0.580813	8.71193	0	0	0	1.59344	8.71193	1.59344	8.65819	1.01263	0	0	1	0	0.00616889	0	0	0.364502	0.688575	0.111067	0.1613	0	0	0	0	0	0	0	6.34442
Pna-17	0	0	0	0	0	0	0	11.0301	0	0	0	0.0512367	0	0	2.09974	0.857832	0.154656	0	0.0125165	0	0.513147	11.0301	0	0	0.0512367	2.61288	11.0301	2.66412	11.0301	2.15097	0	0	1	0.0196092	0	0	0	0.196391	1.025	0.154656	0.150883	0.0809311	0	0	0	0	0	0	3.47036
Pro-0	0	0	0	0	0.207799	0.712286	0	2.77551	0	11.3792	0	0.0585701	0.0463718	0	1.01619	0.964267	0.343297	0	0	0.0249944	0.206092	2.77551	12.2993	0	0.0835644	1.22228	15.0748	1.30585	15.0748	1.07476	0	0.920085	0.184116	0.0683676	0	0	0.299103	0.168613	1.30756	0.343297	0.262547	0	0	0	0	0.807463	0	2.71276	1.53307
Pu2-23	0	0	0	0	0	0	0	6.21357	0	0.0549671	0.0346122	0	0	0	1.31503	1.08251	0.106349	0	0.0303466	0.0127988	0.799664	6.24819	0.0549671	0	0.0127988	2.11469	6.30315	2.12749	6.26854	1.31503	0	0	0.991279	0.00605232	0.00553956	0	1	0.378146	1.21921	0.106349	0.0872277	0.28535	0	0	0	0	0	0	13.8825
Pu2-7	0	0	0	0	0	0.00209492	0	10.2816	0	0.0345889	0	0	0	0	1.31407	1.13976	0.297759	0.0744003	0.0191544	0.00880513	0.893973	10.2816	0.0366838	0.0744003	0.00880513	2.20804	10.3183	2.21685	10.3183	1.31407	0	0.00209492	0.996445	0.00398775	0	0	1	0.404871	1.45667	0.297759	0.204411	0.0643286	0	0	0	0	0	0	4.27108
Ra-0	7.92508	0.712916	0	0	0	0	0.0380368	0	0	0	0.201102	0.0803232	0	0	1.32656	1.64127	0.210673	0	0.0357642	0.0068051	0.422344	8.83909	0.0380368	0	0.0871283	1.7489	8.87713	1.83603	0	2.15783	7.92508	0	0.995715	0.0498189	0.0227514	0	0.0781044	0.241491	1.8877	0.210673	0.111603	0.169762	8.8063	0.773586	0	0	0	0	0
Ren-1	0.00786518	0	0.0315265	0	1.13077	4.25295	0	0.0560029	0	0.605904	0	0.0478463	0	0.211762	1.64074	0.462445	0.171299	0	0.00790786	0.498133	0.729673	0.0638681	6.20139	0	0.545979	2.37041	6.26526	2.91639	6.07715	1.68859	0.00786518	5.38372	0.010194	0.230331	0	0.036561	0.912366	0.307825	0.641653	0.171299	0.266966	0.046164	0	0.0599864	0.102931	1.67048	0	5.62414	0
Ren-11	0	0	0.0252426	0	1.09215	3.87446	0.0868805	0	0	0.738535	0	0	0	0	0.89222	0.74949	0.131753	0.0445271	0	0.326491	0.491912	0	5.79203	0.0445271	0.326491	1.38413	5.79203	1.71062	5.73039	0.9791	0	4.96661	0	0.235881	0	0	1	0.355394	0.881243	0.131753	0.149508	0	0	0	0.0927321	1.3154	0	4.35842	0
Rmx-A02	0.0218888	0.0226398	0	0	0	0	0	10.3433	0	0	0.0400504	0	0	0	1.21977	0.54673	0.24079	0.0415035	0	0	0.662061	10.4279	0	0.0415035	0	1.88183	10.4279	1.88183	10.3433	1.24241	0.0218888	0	1	0	0.00384069	0	0	0.351817	0.78752	0.24079	0.305757	0	0	0	0	0	0	0	8.60665
Rmx-A180	0.0616037	0.0956164	0	0	0	0	0	12.0314	0	0.0871773	0	0	0	0	1.63864	1.03271	0.172087	0	0.00271455	0	0.518621	12.1886	0.0871773	0	0	2.15726	12.2758	2.15726	12.1186	1.73426	0.0616037	0	0.992898	0	0	0	0	0.240407	1.20751	0.172087	0.142513	0.0157743	0	0	0	0	0	0	12.8591
RRS-10	0	0	0	0	0	0	0	7.81119	0	0	0	0	0	0	0.868938	0.752149	0.098478	0	0	0	0.657144	7.81119	0	0	0	1.52608	7.81119	1.52608	7.81119	0.868938	0	0	1	0	0	0	0	0.430609	0.850627	0.098478	0.115771	0	0	0	0	0	0	0	5.4475
RRS-7	0.00854714	0.0359917	0	0	0	0	0	5.35667	0	0	0.0489588	0	0	0	0.595288	0.645547	0.120864	0	0.014668	0.0381783	0.332897	5.45017	0	0	0.0381783	0.928185	5.45017	0.966363	5.35667	0.63128	0.00854714	0	1	0.0411322	0.00898299	0	1	0.358654	0.781079	0.120864	0.15474	0.121359	0	0.0666189	0	0	0	0	6.28387
Se-0	0	0.27806	0	0	0	0	1.12588	0	0	0	0.406669	0	0	3.09932	0.412711	0.591955	0.191591	0	0	0	0.251646	0.684728	4.2252	0	0	0.664357	4.90993	0.664357	0	1.81666	0	0	0.139458	0	0.593912	0.504753	0	0.378781	0.783547	0.191591	0.244518	0	0	0.370084	0	0	2.06974	0	0
Shahdara	0	0	0	0	0	0	0	2.40273	0	6.14027	0	0.0572526	0	0	0.498273	0.697011	0.17124	0	0.0323216	0.0110059	0.200209	2.40273	6.14027	0	0.0682586	0.698482	8.54299	0.766741	8.54299	0.555526	0	0	0.281251	0.0977241	0	0	0.161239	0.286635	0.900573	0.17124	0.190146	0.18875	0	0	0	0	0	0	2.75949
Sorbo	0	0	0	0	0	0	0	3.4068	0	14.7382	0	0.0493974	0.12927	0	1.26987	0.828813	0.313825	0	0	0.0120913	0.317472	3.4068	14.7382	0	0.0614887	1.58735	18.145	1.64883	18.145	1.31927	0	0	0.187754	0.0387368	0	0	0.196642	0.200002	1.14264	0.313825	0.27465	0	0	0.0435929	0	0	0	0	6.1101
Spr1-2	0	0.212488	0	0	0	0	0	6.89846	0	0	0	0	0	0	1.14535	0.350074	0.128102	0.0433562	0.0407784	0	0.248583	7.11095	0	0.0433562	0	1.39393	7.11095	1.39393	6.89846	1.35784	0	0	1	0	0	0	0	0.178332	0.518955	0.128102	0.246847	0.318327	0	0	0	0	0	0	4.88162
Spr1-6	0	0	0	0	0	0	0	4.08692	0	0	0	0	0	0	0.508251	0.315229	0.141593	0	0.00419848	0	0.361284	4.08692	0	0	0	0.869535	4.08692	0.869535	4.08692	0.508251	0	0	1	0	0	0	0	0.415491	0.46102	0.141593	0.30713	0.0296517	0	0	0	0	0	0	14.3941
Sq-1	0	0	0.146107	0	1.89877	6.28316	0	0.266114	0.0530448	5.94673	0	0.271529	0.254863	0	2.29529	0.943229	0.173949	0.0612438	0.014138	0.512958	0.584534	0.266114	14.1287	0.114289	0.784486	2.87983	14.3948	3.66431	14.5409	2.61987	0	8.18193	0.0184868	0.272407	0	0	0.653877	0.202975	1.13132	0.173949	0.153758	0.0812766	0	0	0.183255	2.39906	0	7.75426	0.424934
Sq-8	10.3074	6.62322	0	0	0	0	0.0872939	0	0	0	0.486205	0	0	0	1.16822	1.2746	0.142927	0.0388359	0	0.124947	0.504417	17.4168	0.0872939	0.0388359	0.124947	1.67264	17.5041	1.79758	0	7.87874	10.3074	0	0.995013	0.0747003	0.0279158	0	1	0.30157	1.41752	0.142927	0.100829	0	4.30267	2.54427	0	0	0	0	0
Tamm-2	0	0	0	0	0	0	0	13.8334	0	0.0648938	0	0	0	0	0.728201	0.833716	0.136586	0	0.013833	0.00649284	0.309576	13.8334	0.0648938	0	0.00649284	1.03778	13.8983	1.04427	13.8983	0.728201	0	0	0.995331	0.00625648	0	0	1	0.298307	0.984135	0.136586	0.138788	0.101277	0	0	0	0	0	0	30.4911
Tamm-27	0	0	0	0	0	0	0	10.5664	0	0.0265869	0	0	0	0	0.521641	0.507419	0.14418	0	0.0126735	0	0.29352	10.5664	0.0265869	0	0	0.815162	10.593	0.815162	10.593	0.521641	0	0	0.99749	0	0	0	0	0.360076	0.664273	0.14418	0.21705	0.0879001	0	0.0559555	0	0	0	0	19.2658
Ts-1	0	0	0	0	0	0	0.53179	0	0	0	0	0	0	1.36911	1.33077	0.578725	0.180139	0	0	0.191475	0.825259	0	1.9009	0	0.191475	2.15603	1.9009	2.34751	0	1.86256	0	0	0	0.0888089	0	0.246819	1	0.382767	0.758864	0.180139	0.23738	0	0	0	0	0	0.614967	0	0
Ts-5	0	0.0494494	0	0	0.863566	3.26247	0	0.614464	0	1.04116	0	0.088218	0	0.379837	0.990402	1.47669	0.233754	0	0.00429275	0.0605341	0.453951	0.663914	5.54703	0	0.148752	1.44435	6.21095	1.59311	5.78166	1.12807	0	4.12604	0.106894	0.102989	0	0	0.406946	0.314294	1.71473	0.233754	0.136321	0.0183644	0	0.0413075	0	1.18107	0	4.09006	1.0179
Tsu-1	6.79554	1.16674	0	0	0	0	0	0	0	0	0.16878	0	0	0	1.22231	1.34848	0.156219	0	0	0	0.40922	8.13106	0	0	0	1.63153	8.13106	1.63153	0	2.38905	6.79554	0	1	0	0.0207574	0	0	0.25082	1.5047	0.156219	0.103821	0	19.7715	0.562104	0	0	0.065322	0	0
Ull2-3	5.6553	0.412441	0	0	0	0	0	0.0120371	0	0	0.0541823	0	0	0	1.27808	1.61366	0.285147	0.0823291	0.0207718	0.0128773	0.715946	6.13396	0	0.0823291	0.0128773	1.99403	6.13396	2.00691	0.0120371	1.69052	5.6553	0	1	0.00645794	0.00883317	0	1	0.359045	1.91958	0.285147	0.148546	0.0728459	3.00178	0.18936	0	0	0	0	0
Ull2-5	0.0620447	0.042534	0	0	0	0	0	5.97782	0	0	0	0.0675422	0	0	0.75694	0.60507	0.200483	0.0501874	0.00525194	0.00783124	0.49487	6.08239	0	0.0501874	0.0753734	1.25181	6.08239	1.32718	5.97782	0.867016	0.0620447	0	1	0.0602116	0	0	0.103899	0.395323	0.810806	0.200483	0.247264	0.0261964	0	0	0	0	0	0	3.78983
Uod-1	9.38904	0.534112	0	0	0	0	0	0.0460981	0	0.0119745	0.0379788	0.0186947	0	0	1.02774	0.676932	0.193117	0	0	0.0148621	0.445893	10.0072	0.0119745	0	0.0335568	1.47363	10.0192	1.50719	0.0580726	1.58054	9.38904	0	0.998805	0.0227716	0.00379513	0	0.442895	0.302581	0.870049	0.193117	0.221962	0	4.47702	0.232471	0	0	0	0	0
Uod-7	0.0700889	0	0	0.0332993	0	0	0	8.99016	0	0.0485815	0	0	0.0174839	0	1.05682	1.18055	0.131917	0	0.0245744	0.0203096	0.589661	9.06025	0.0818809	0	0.0203096	1.64648	9.14213	1.66679	9.03874	1.05682	0.103388	0	0.991044	0.0123352	0	0	1	0.358135	1.33704	0.131917	0.0986635	0.186287	0	0	0	0	0	0	7.94581
Van-0	0.064469	0	0	0	0	0	0	6.7901	0.074106	0.112266	0.0593671	0.0415849	0	0	0.804306	0.517005	0.155219	0	0	0.31156	0.672668	6.91394	0.112266	0.074106	0.353145	1.47697	7.02621	1.83012	6.90237	0.919997	0.064469	0	0.984022	0.2391	0.00858657	0	0.882244	0.455436	0.672224	0.155219	0.230904	0	0	0	0	0	0	0	8.62209
Var2-1	0.0985176	0	0	0	0	0	0	6.58919	0	0	0	0	0	0	0.511158	0.661459	0.105658	0	0	0.0119855	0.514265	6.68771	0	0	0.0119855	1.02542	6.68771	1.03741	6.58919	0.511158	0.0985176	0	1	0.0116883	0	0	1	0.501515	0.767117	0.105658	0.137734	0	0	0	0	0	0	0	11.3069
Var2-6	0.175058	0	0	0	0	0	0	6.26579	0.0248206	0	0	0	0	0	0.773357	0.344888	0.0902434	0	0	0.0138317	0.585165	6.44085	0	0.0248206	0.0138317	1.35852	6.44085	1.37235	6.26579	0.798178	0.175058	0	1	0.0101814	0	0	1	0.430737	0.435132	0.0902434	0.207393	0	0	0	0	0	0	0	17.2932
Wa-1	0.00687035	5.77403	0	0	0	0	0	0.0393751	0	0	0.390787	0.0531177	0	0	3.53575	1.87049	0.359143	0	0.0588379	0.012877	1.06994	6.21106	0	0	0.0659947	4.60568	6.21106	4.67168	0.0393751	9.36289	0.00687035	0	1	0.014329	0.062918	0	0.195122	0.232308	2.28847	0.359143	0.156936	0.163829	0	0.510823	0	0	0	0	0
Ws-0	0.103136	0	0	0	0	0	0	8.7216	0.090102	0	0	0	0	0	1.07596	0.573067	0.0661744	0	0.00857925	0.225205	0.701191	8.82473	0	0.090102	0.225205	1.77715	8.82473	2.00235	8.7216	1.16606	0.103136	0	1	0.126723	0	0	1	0.394559	0.64782	0.0661744	0.102149	0.129646	25.3142	0.422966	0	0	0	0	0
Ws-2	0.0086495	10.7562	0	0	0	0.0645304	0	0	0	0	0.556409	0	0	0	1.06996	1.64944	0.193655	0	0	0.0398552	0.266046	11.3213	0.0645304	0	0.0398552	1.33601	11.3858	1.37587	0.0645304	11.8262	0.0086495	0.0645304	0.994332	0.0298315	0.0491472	0	1	0.199135	1.8431	0.193655	0.10507	0	0	0	0	0	0	0	13.7584
Wt-5	0.180892	0	0	0	0	0	0.55352	0	0	0	0	0	0	0.336736	0.249523	0.50355	0.140483	0	0	0	0.281255	0.180892	0.890256	0	0	0.530778	1.07115	0.530778	0	0.803043	0.180892	0	0.168877	0	0	14.5691	0	0.529892	0.644033	0.140483	0.21813	0	0	3.78219	0	0	0	0	0
Yo-0	0.201461	0	0	0	0	0	0	12.2607	0.223894	0	0.103456	0.0457904	0	0.0231131	1.15479	0.783975	0.171913	0	0	0	0.618639	12.5657	0.0231131	0.223894	0.0457904	1.77342	12.5888	1.81921	12.2607	1.42447	0.201461	0	0.998164	0.0258203	0.00823323	0	0	0.348839	0.955888	0.171913	0.179846	0	0.575492	0.0981705	0	0.0767723	2.53167	0	0
Zdr-1	8.52383	0.0567964	0	0	0	0	0	0.0336806	0	0	0.0350351	0.10494	0	0	1.57986	1.16628	0.14807	0.0338551	0.0321964	0	0.599995	8.64934	0	0.0338551	0.10494	2.17985	8.64934	2.28479	0.0336806	1.74159	8.52383	0	1	0.0481407	0.0040506	0	0	0.275246	1.34655	0.14807	0.109963	0.21744	0	0	0	0	0	0.0247832	12.4287
Zdr-6	11.58	0	0	0	0	0	0	0.032662	0	0	0	0	0	0	0.791007	0.627367	0.183252	0.0466391	0.0287386	0	0.420976	11.6127	0	0.0466391	0	1.21198	11.6127	1.21198	0.032662	0.791007	11.58	0	1	0	0	0	0	0.347345	0.839357	0.183252	0.218324	0.156825	6.69061	0	0	0	0	0	0
																																											8.41959	0	0	0	0	0	0
[truncated: 34 more columns]
