# Supplementary material for: Understanding the Evolution of Defense Metabolites in Arabidopsis thaliana Using Genome-wide Association Mapping
Source: Oxford University Press journal article supplement (doi:10.1534/genetics.109.108522), 2009-09-09
Supplement: tables5.xls [file tables5.xls]

## Sheet: TABLE S5
TABLE S5
Gene to Trait Associations as identified using EMMA
Logical table indicating whether each of 31,505 genes is significantly associated to each of the 43 traits. For each trait, a gene is significantly associated if at least two SNP within ±1kb flanking the coding region has a P-value in the bottom 0.1 percentile of the P-value distribution. T: is significant in either 2007 or 2008 set; F: not significant both 2007 and 2008 set; -: not significant i…
EMMA	OHP	X3MSO	OHBUTUNK	OHBUTS	X4MSO	OHBUTR	ALLYL	X5MSO	BUTENYL	X3MT	X4OHI3M	X7MSO	PENTENYL	X4MT	X8MSO	I3M	X4MOI3M	NMOI3M	X7MT	X8MT	OHB	X5MT	C3	C4	C5	C7	C8	SC	LC	Alkenyl	MSO	OH	OHAlk	ElongSC	ElongLC	GSOX3	GSOX4	GSOX7	GSOX8	TIND	TOH4	OH4Per	NOHPer
AT1G01010	F	F	F	F	F	F	F	F	F	F	-	F	F	F	F	F	F	F	F	F	-	-	F	F	F	F	F	F	F	F	F	F	F	F	F	F	F	F	F	F	F	F	F
AT1G01020	F	F	F	F	F	F	F	F	F	F	-	F	F	F	F	F	F	F	F	F	-	-	F	F	F	F	F	F	F	F	F	F	F	F	F	F	F	F	F	F	F	F	F
AT1G01030	F	F	F	F	F	F	F	F	F	F	-	F	F	F	F	F	F	F	F	F	-	-	F	F	F	F	F	F	F	F	F	F	F	F	F	F	F	F	F	F	F	F	F
AT1G01040	F	F	F	F	F	F	F	F	F	F	-	F	F	F	F	F	F	F	F	F	-	-	F	F	F	F	F	F	F	F	F	F	F	F	F	F	F	F	F	F	F	F	F
AT1G01046	F	F	F	F	F	F	F	F	F	F	-	F	F	F	F	F	F	F	F	F	-	-	F	F	F	F	F	F	F	F	F	F	F	F	F	F	F	F	F	F	F	F	F
AT1G01050	F	F	F	F	F	F	F	F	F	F	-	F	F	F	F	F	F	F	F	F	-	-	F	F	F	F	F	F	F	F	F	F	F	F	F	F	F	F	F	F	F	F	F
AT1G01060	F	F	F	F	F	F	F	F	F	F	-	F	F	F	F	F	F	F	F	F	-	-	F	F	F	F	F	F	F	F	F	F	F	F	F	F	F	F	F	F	F	F	F
AT1G01070	F	F	F	F	F	F	F	F	F	F	-	F	F	F	F	F	F	F	F	F	-	-	F	F	F	F	F	F	F	F	F	F	F	F	F	F	F	F	F	F	F	F	F
AT1G01080	F	F	F	F	F	F	F	F	F	F	-	F	F	F	F	F	F	F	F	F	-	-	F	F	F	F	F	F	F	F	F	F	F	F	F	F	F	F	F	F	F	F	F
AT1G01090	F	F	F	F	F	F	F	F	F	F	-	F	F	F	F	F	F	F	F	F	-	-	F	F	F	F	F	F	F	F	F	F	F	F	F	F	F	F	F	F	F	F	F
AT1G01100	F	F	F	F	F	F	F	F	F	F	-	F	F	F	F	F	F	F	F	F	-	-	F	F	F	F	F	F	F	F	F	F	F	F	F	F	F	F	F	F	F	F	F
AT1G01110	F	F	F	F	F	F	F	F	F	F	-	F	F	F	F	F	F	F	F	F	-	-	F	F	F	F	F	F	F	F	F	F	F	F	F	F	F	F	F	F	F	F	F
AT1G01120	F	F	F	F	F	F	F	F	F	F	-	F	F	F	F	F	F	F	F	F	-	-	F	F	F	F	F	F	F	F	F	F	F	F	F	F	F	F	F	F	F	F	F
AT1G01130	F	F	F	F	F	F	F	F	F	F	-	F	F	F	F	F	F	F	F	F	-	-	F	F	F	F	F	F	F	F	F	F	F	F	F	F	F	F	F	F	F	F	F
AT1G01140	F	F	F	F	F	F	F	F	F	F	-	F	F	F	F	F	F	F	F	F	-	-	F	F	F	F	F	F	F	F	F	F	F	F	F	F	F	F	F	F	F	F	F
AT1G01150	F	F	F	F	F	F	F	F	F	F	-	F	F	F	F	F	F	F	F	F	-	-	F	F	F	F	F	F	F	F	F	F	F	F	F	F	F	F	F	F	F	F	F
AT1G01160	F	F	F	F	F	F	F	F	F	F	-	F	F	F	F	F	F	F	F	F	-	-	F	F	F	F	F	F	F	F	F	F	F	F	F	F	F	F	F	F	F	F	F
AT1G01170	F	F	F	F	F	F	F	F	F	F	-	F	F	F	F	F	F	F	F	F	-	-	F	F	F	F	F	F	F	F	F	F	F	F	F	F	F	F	F	F	F	F	F
AT1G01180	F	F	F	F	F	F	F	F	F	F	-	F	F	F	F	F	F	F	F	F	-	-	F	F	F	F	F	F	F	F	F	F	F	F	F	F	F	F	F	F	F	F	F
AT1G01183	F	F	F	F	F	F	F	F	F	F	-	F	F	F	F	F	F	F	F	F	-	-	F	F	F	F	F	F	F	F	F	F	F	F	F	F	F	F	F	F	F	F	F
AT1G01190	F	F	F	F	F	F	F	F	F	F	-	F	F	F	F	F	F	F	F	F	-	-	F	F	T	F	F	F	F	F	F	F	F	F	F	F	F	F	F	F	F	F	F
AT1G01200	F	F	F	F	F	F	F	F	F	F	-	F	F	F	F	F	F	F	F	F	-	-	F	F	F	F	F	F	F	F	F	F	F	F	F	F	F	F	F	F	F	F	F
AT1G01210	F	F	F	F	F	F	F	F	F	F	-	F	F	F	F	F	F	F	F	F	-	-	F	F	F	F	F	F	F	F	F	F	F	F	F	F	F	F	F	F	F	F	F
AT1G01220	F	F	F	F	F	F	F	F	F	F	-	F	F	F	F	F	F	F	F	F	-	-	F	F	F	F	F	F	F	F	F	F	F	F	F	F	F	F	F	F	F	F	F
AT1G01225	F	F	F	F	F	F	F	F	F	F	-	F	F	F	F	F	F	F	F	F	-	-	F	F	F	F	F	F	F	F	F	F	F	F	F	F	F	F	F	F	F	F	F
AT1G01230	F	F	F	F	F	F	F	F	F	F	-	F	F	F	F	F	F	F	F	F	-	-	F	F	F	F	F	F	F	F	F	F	F	F	F	F	F	F	F	F	F	F	F
AT1G01240	F	F	F	F	F	F	F	F	F	F	-	F	F	F	F	F	F	F	F	F	-	-	F	F	F	F	F	F	F	F	F	F	F	F	F	F	F	F	F	F	F	F	F
AT1G01250	F	F	F	F	F	F	F	F	F	F	-	F	F	F	F	F	F	F	F	F	-	-	F	F	F	F	F	F	F	F	F	F	F	F	F	F	F	F	F	F	F	F	F
AT1G01260	F	F	F	F	F	F	F	F	F	F	-	F	F	F	F	F	F	F	F	F	-	-	F	F	F	F	F	F	F	F	F	F	F	F	F	F	F	F	F	F	F	F	F
AT1G01270	F	F	F	F	F	F	F	F	F	F	-	F	F	F	F	F	F	F	F	F	-	-	F	F	F	F	F	F	F	F	F	F	F	F	F	F	F	F	F	F	F	F	F
AT1G01280	F	F	F	F	F	F	F	F	F	F	-	F	F	F	F	F	F	F	F	F	-	-	F	F	F	F	F	F	F	F	F	F	F	F	F	F	F	F	F	F	F	F	F
AT1G01290	F	F	F	F	F	F	F	F	F	F	-	F	F	F	F	F	F	F	F	F	-	-	F	F	F	F	F	F	F	F	F	F	F	F	F	F	F	F	F	F	F	F	F
AT1G01300	F	F	F	F	F	F	F	F	F	F	-	F	F	F	F	F	F	F	F	F	-	-	F	F	F	F	F	F	F	F	F	F	F	F	F	F	F	F	F	F	F	F	F
AT1G01305	F	F	F	F	F	F	F	F	F	F	-	F	F	F	F	F	F	F	F	F	-	-	F	F	F	F	F	F	F	F	F	F	F	F	F	F	F	F	F	F	F	F	F
AT1G01310	F	F	F	F	F	F	F	F	F	F	-	F	F	F	F	F	F	F	F	F	-	-	F	F	F	F	F	F	F	F	F	F	F	F	F	F	F	F	F	F	F	F	F
AT1G01320	F	F	F	F	F	F	F	F	F	F	-	F	F	F	F	F	F	F	F	F	-	-	F	F	T	F	F	F	F	F	F	F	F	F	F	F	F	F	F	F	F	F	F
AT1G01340	F	F	F	F	F	F	F	F	F	F	-	F	F	F	F	F	F	F	F	F	-	-	F	F	F	F	F	F	F	F	F	F	F	F	F	F	F	F	F	F	F	F	F
AT1G01350	F	F	F	F	F	F	F	F	F	F	-	F	F	F	F	F	F	F	F	F	-	-	F	F	F	F	F	F	F	F	F	F	F	F	F	F	F	F	F	F	F	F	F
AT1G01355	F	F	F	F	F	F	F	F	F	F	-	F	F	F	F	F	F	F	F	F	-	-	F	F	F	F	F	F	F	F	F	F	F	F	F	F	F	F	F	F	F	F	F
AT1G01360	F	F	T	F	F	F	F	F	F	F	-	F	F	F	F	F	F	F	F	F	-	-	F	F	F	F	F	F	F	F	F	F	F	F	F	F	F	F	F	F	F	F	F
AT1G01370	F	F	T	F	F	F	F	F	F	F	-	F	F	F	F	F	F	F	F	F	-	-	F	F	F	F	F	F	F	F	F	F	F	F	F	F	F	F	F	F	F	F	F
AT1G01380	F	F	F	F	F	F	F	F	F	F	-	F	F	F	F	F	F	F	F	F	-	-	F	F	F	F	F	F	F	F	F	F	F	F	F	F	F	F	F	F	F	F	F
AT1G01390	F	F	F	F	F	F	F	F	F	F	-	F	F	F	F	F	F	F	F	F	-	-	F	F	F	F	F	F	F	F	F	F	F	F	F	F	F	F	F	F	F	F	F
AT1G01400	F	F	F	F	F	F	F	F	F	F	-	F	F	F	F	F	F	F	F	F	-	-	F	F	F	F	F	F	F	F	F	F	F	F	F	F	F	F	F	F	F	F	F
AT1G01410	F	F	F	F	F	F	F	F	F	F	-	F	F	F	F	F	F	F	F	F	-	-	F	F	F	F	F	F	F	F	F	F	F	F	F	F	F	F	F	F	F	F	F
AT1G01420	F	F	F	F	F	F	F	F	F	F	-	F	F	F	F	F	F	F	F	F	-	-	F	F	F	F	F	F	F	F	F	F	F	F	F	F	F	F	F	F	F	F	F
AT1G01430	F	F	F	F	F	F	F	F	F	F	-	F	F	F	F	F	F	F	F	F	-	-	F	F	F	F	F	F	F	F	F	F	F	F	F	F	F	F	F	F	F	F	F
AT1G01440	F	F	F	F	F	F	F	F	F	F	-	F	F	F	F	F	F	F	F	F	-	-	F	F	F	F	F	F	F	F	F	F	F	F	F	F	F	F	F	F	F	F	F
AT1G01448	F	F	F	F	F	F	F	F	F	F	-	F	F	F	F	F	F	F	F	F	-	-	F	F	F	F	F	F	F	F	F	F	F	F	F	F	F	F	F	F	F	F	F
AT1G01450	F	F	F	F	F	F	F	F	F	F	-	F	F	F	F	F	F	F	F	F	-	-	F	F	F	F	F	F	F	F	F	F	F	F	F	F	F	F	F	F	F	F	F
AT1G01453	F	F	F	F	F	F	F	F	F	F	-	F	F	F	F	F	F	F	F	F	-	-	F	F	F	F	F	F	F	F	F	F	F	F	F	F	F	F	F	F	F	F	F
AT1G01460	F	F	F	F	F	F	F	F	F	F	-	F	F	F	F	F	F	F	F	F	-	-	F	F	F	F	F	F	F	F	F	F	F	F	F	F	F	F	F	F	F	F	F
AT1G01470	F	F	F	F	F	F	F	F	F	F	-	F	F	F	F	F	F	F	F	F	-	-	F	F	F	F	F	F	F	F	F	F	F	F	F	F	F	F	F	F	F	F	F
AT1G01471	F	F	F	F	F	F	F	F	F	F	-	F	F	F	F	F	F	F	F	F	-	-	F	F	F	F	F	F	F	F	F	F	F	F	F	F	F	F	F	F	F	F	F
AT1G01480	F	F	F	F	F	F	F	F	F	F	-	F	F	F	F	F	F	F	F	F	-	-	F	F	F	F	F	F	F	F	F	F	F	F	F	F	F	F	F	F	F	F	F
AT1G01490	F	F	F	F	F	F	F	F	F	F	-	F	F	F	F	F	F	F	F	F	-	-	F	F	F	F	F	F	F	F	F	F	F	F	F	F	F	F	F	F	F	F	F
AT1G01500	F	F	F	F	F	F	F	F	F	F	-	F	F	F	F	F	F	F	F	F	-	-	F	F	F	F	F	F	F	F	F	F	F	F	F	F	F	F	F	F	F	F	F
AT1G01510	F	F	F	F	F	F	F	F	F	F	-	F	F	F	F	F	F	F	F	F	-	-	F	F	F	F	F	F	F	F	F	F	F	F	F	F	F	F	F	F	F	F	F
AT1G01520	F	F	F	F	F	F	F	F	F	F	-	F	F	F	F	F	F	F	F	F	-	-	F	F	F	F	F	F	F	F	F	F	F	F	F	F	F	F	F	F	F	F	F
AT1G01530	F	F	F	F	F	F	F	F	F	F	-	F	F	F	F	F	F	F	F	F	-	-	F	F	F	F	F	F	F	F	F	F	F	F	F	F	F	F	F	F	F	F	F
AT1G01540	F	F	F	F	F	F	F	F	F	F	-	F	F	F	F	F	F	F	F	F	-	-	F	F	F	F	F	F	F	F	F	F	F	F	F	F	F	F	F	F	F	F	F
AT1G01550	F	F	F	F	F	F	F	F	F	F	-	F	F	F	F	F	F	F	F	F	-	-	F	F	F	F	F	F	F	F	F	F	F	F	F	F	F	F	F	F	F	F	F
AT1G01560	F	F	F	F	F	F	F	F	F	F	-	F	F	F	F	F	F	F	F	F	-	-	F	F	F	F	F	F	F	F	F	F	F	F	F	F	F	F	F	F	F	F	F
AT1G01570	F	F	F	F	F	F	F	F	F	F	-	F	F	F	F	F	F	F	F	F	-	-	F	F	F	F	F	F	F	F	F	F	F	F	F	F	F	F	F	F	F	F	F
AT1G01580	F	F	F	F	F	F	F	F	F	F	-	F	F	F	F	F	F	F	F	F	-	-	F	F	F	F	F	F	F	F	F	F	F	F	F	F	F	F	F	F	F	F	F
AT1G01590	F	F	F	F	F	F	F	F	F	F	-	F	F	F	F	F	F	F	F	F	-	-	F	F	F	F	F	F	F	F	F	F	F	F	F	F	F	F	F	F	F	F	F
AT1G01600	F	F	F	F	F	F	F	F	F	F	-	F	F	F	F	F	F	F	F	F	-	-	F	F	F	F	F	F	F	F	F	F	F	F	F	F	F	F	F	F	F	F	F
AT1G01610	F	F	F	F	F	F	F	F	F	F	-	F	F	F	F	F	F	F	F	F	-	-	F	F	F	F	F	F	F	F	F	F	F	F	F	F	F	F	F	F	F	F	F
AT1G01620	F	F	F	F	F	F	F	F	F	F	-	F	F	F	F	F	F	F	F	F	-	-	F	F	F	F	F	F	F	F	F	F	F	F	F	F	F	F	F	F	F	F	F
AT1G01630	F	F	F	F	F	F	F	F	F	F	-	F	F	F	F	F	F	F	F	F	-	-	F	F	F	F	F	F	F	F	F	F	F	F	F	F	F	F	F	F	F	F	F
AT1G01640	F	F	F	F	F	F	F	F	F	F	-	F	F	F	F	F	F	F	F	F	-	-	F	F	F	F	F	F	F	F	F	F	F	F	F	F	F	F	F	F	F	F	F
AT1G01650	F	F	F	F	F	F	F	F	F	F	-	F	F	F	F	F	F	F	F	F	-	-	F	F	F	F	F	F	F	F	F	F	F	F	F	F	F	F	F	F	F	F	F
AT1G01660	F	F	F	F	F	F	F	F	F	F	-	F	T	F	F	F	F	F	F	F	-	-	F	F	T	F	F	F	F	F	F	F	F	F	F	F	F	F	F	F	F	F	F
AT1G01670	F	F	F	F	F	F	F	F	F	F	-	F	T	F	F	F	F	F	F	F	-	-	F	F	T	F	F	T	T	F	F	F	F	F	F	F	F	F	F	F	F	F	F
AT1G01680	F	F	F	F	F	F	F	F	F	F	-	F	F	F	F	F	F	F	F	F	-	-	F	F	T	F	F	F	F	F	F	F	F	F	F	F	F	F	F	F	F	F	F
AT1G01690	F	F	F	F	F	F	F	F	F	F	-	F	F	F	F	F	F	F	F	F	-	-	F	F	F	F	F	F	F	F	F	F	F	F	F	F	F	F	F	F	F	F	F
AT1G01695	F	F	F	F	F	F	F	F	F	F	-	F	F	F	F	F	F	F	F	F	-	-	F	F	F	F	F	F	F	F	F	F	F	F	F	F	F	F	F	F	F	F	F
AT1G01700	F	F	F	F	F	F	F	F	F	F	-	F	F	F	F	F	F	F	F	F	-	-	F	F	F	F	F	F	F	F	F	F	F	F	F	F	F	F	F	F	F	F	F
AT1G01710	F	F	F	F	F	F	F	F	F	F	-	F	F	F	F	F	F	F	F	F	-	-	F	F	F	F	F	F	F	F	F	F	F	F	F	F	F	F	F	F	F	F	F
AT1G01720	F	F	F	F	F	F	F	F	F	F	-	F	F	F	F	F	F	F	F	F	-	-	F	F	F	F	F	F	F	F	F	F	F	F	F	F	F	F	F	F	F	F	F
AT1G01725	F	F	F	F	F	F	F	F	F	F	-	F	F	F	F	F	F	F	F	F	-	-	F	F	F	F	F	F	F	F	F	F	F	F	F	F	F	F	F	F	F	F	F
AT1G01730	F	F	F	F	F	F	F	F	F	F	-	F	F	F	F	F	F	F	F	F	-	-	F	F	F	F	F	F	F	F	F	F	F	F	F	F	F	F	F	F	F	F	F
AT1G01740	F	F	F	F	F	F	F	F	F	F	-	F	F	F	F	F	F	F	F	F	-	-	F	F	F	F	F	F	F	F	F	F	F	F	F	F	F	F	F	F	F	F	F
AT1G01750	F	F	F	F	F	F	F	F	F	F	-	F	F	F	F	F	F	F	F	F	-	-	F	F	F	F	F	F	F	F	F	F	F	F	F	F	F	F	F	F	F	F	F
AT1G01760	F	F	F	F	F	F	F	F	F	F	-	F	F	F	F	F	F	F	F	F	-	-	F	F	F	F	F	F	F	F	F	F	F	F	F	F	F	F	F	F	F	F	F
AT1G01770	F	F	F	F	F	F	F	F	F	F	-	F	F	F	F	F	F	F	F	F	-	-	F	F	F	F	F	F	F	F	F	F	F	F	F	F	F	F	F	F	F	F	F
AT1G01780	F	F	F	F	F	F	F	F	F	F	-	F	F	F	F	F	F	F	F	F	-	-	F	F	F	F	F	F	F	F	F	F	F	F	F	F	F	F	F	F	F	F	F
AT1G01790	F	F	F	F	F	F	F	F	F	F	-	F	F	F	F	F	F	F	F	F	-	-	F	F	F	F	F	F	F	F	F	F	F	F	F	F	F	F	F	F	F	F	F
AT1G01800	F	F	F	F	F	F	F	F	F	F	-	F	F	F	F	F	F	F	F	F	-	-	F	F	F	F	F	F	F	F	F	F	F	F	F	F	F	F	F	F	F	F	F
AT1G01810	F	F	F	F	F	F	F	F	F	F	-	F	F	F	F	F	F	F	F	F	-	-	F	F	F	F	F	F	F	F	F	F	F	F	F	F	F	F	F	F	F	F	F
AT1G01820	F	F	F	F	F	F	F	F	F	F	-	F	F	F	F	F	F	F	F	F	-	-	F	F	F	F	F	F	F	F	F	F	F	F	F	F	F	F	F	F	F	F	F
AT1G01830	F	F	F	F	F	F	F	F	F	F	-	F	F	F	F	F	F	F	F	F	-	-	F	F	F	F	F	F	F	F	F	F	F	F	F	F	F	F	F	F	F	F	F
AT1G01840	F	F	F	F	F	F	F	F	F	F	-	F	F	F	F	F	F	F	F	F	-	-	F	F	F	F	F	F	F	F	F	F	F	F	F	F	F	F	F	F	F	F	F
AT1G01860	F	F	F	F	F	F	F	F	F	F	-	F	F	F	F	F	F	F	F	F	-	-	F	F	F	F	F	F	F	F	F	F	F	F	F	F	F	F	F	F	F	F	F
AT1G01870	F	F	F	F	F	F	F	F	F	F	-	F	F	F	F	F	F	F	F	F	-	-	F	F	F	F	F	F	F	F	F	F	F	F	F	F	F	F	F	F	F	F	F
AT1G01880	F	F	F	F	F	F	F	F	F	F	-	F	F	F	F	F	F	F	F	F	-	-	F	F	F	F	F	F	F	F	F	F	F	F	F	F	F	F	F	F	F	F	F
AT1G01890	F	F	F	F	F	F	F	F	F	F	-	F	F	F	F	F	F	F	F	F	-	-	F	F	F	F	F	F	F	F	F	F	F	F	F	F	F	F	F	F	F	F	F
AT1G01900	F	F	F	F	F	F	F	F	F	F	-	F	F	F	F	F	F	F	F	F	-	-	F	F	F	F	F	F	F	F	F	F	F	F	F	F	F	F	F	F	F	F	F
AT1G01910	F	F	F	F	F	F	F	F	F	F	-	F	F	F	F	F	F	F	F	F	-	-	F	F	F	F	F	F	F	F	F	F	F	F	F	F	F	F	F	F	F	F	F
AT1G01920	F	F	F	F	F	F	F	F	F	F	-	F	F	F	F	F	F	F	F	F	-	-	F	F	F	F	F	F	F	F	F	F	F	F	F	F	F	F	F	F	F	F	F
AT1G01930	F	F	F	F	F	F	F	F	F	F	-	F	F	F	F	F	F	F	F	F	-	-	F	F	F	F	F	F	F	F	F	F	F	F	F	F	F	F	F	F	F	F	F
AT1G01940	F	F	F	F	F	F	F	F	F	F	-	F	F	F	F	F	F	F	F	F	-	-	F	F	F	F	F	F	F	F	F	F	F	F	F	F	F	F	F	F	F	F	F
AT1G01950	F	F	F	F	F	F	F	F	F	F	-	F	F	F	F	F	F	F	F	F	-	-	F	F	F	F	F	F	F	F	F	F	F	F	F	F	F	F	F	F	F	F	F
AT1G01960	F	F	F	F	F	F	F	F	F	F	-	F	F	F	F	F	F	F	F	F	-	-	F	F	F	F	F	F	F	F	F	F	F	F	F	F	F	F	F	F	F	F	F
AT1G01970	F	F	F	F	F	F	F	F	F	F	-	F	F	F	F	F	F	F	F	F	-	-	F	F	F	F	F	F	F	F	F	F	F	F	F	F	F	F	F	F	F	F	F
AT1G01980	F	F	F	F	F	F	F	F	F	F	-	F	F	F	F	F	F	F	F	F	-	-	F	F	F	F	F	F	F	F	F	F	F	F	F	F	F	F	F	F	F	F	F
AT1G01990	F	F	F	F	F	F	F	F	F	F	-	F	F	F	F	F	F	F	F	F	-	-	F	F	F	F	F	F	F	F	F	F	F	F	F	F	F	F	F	F	F	F	F
AT1G02000	F	F	F	F	F	F	F	F	F	F	-	F	F	F	F	F	F	F	F	F	-	-	F	F	F	F	F	F	F	F	F	F	F	F	F	F	F	F	F	F	F	F	F
AT1G02010	F	F	F	F	F	F	F	F	F	F	-	F	F	F	F	F	F	F	F	F	-	-	F	F	F	F	F	F	F	F	F	F	F	F	F	F	F	F	F	F	F	F	F
AT1G02020	F	F	F	F	F	F	F	F	F	F	-	F	F	F	F	F	F	F	F	F	-	-	F	F	F	F	F	F	F	F	F	F	F	F	F	F	F	F	F	F	F	F	F
AT1G02030	F	F	F	F	F	F	F	F	F	F	-	F	F	F	F	F	F	F	F	F	-	-	F	F	F	F	F	F	F	F	F	F	F	F	F	F	F	F	F	F	F	F	F
AT1G02040	F	F	F	F	F	F	F	F	F	F	-	F	F	F	F	F	F	F	F	F	-	-	F	F	F	F	F	F	F	F	F	F	F	F	F	F	F	F	F	F	F	F	F
AT1G02050	F	F	F	F	F	F	F	F	F	F	-	F	F	F	F	F	F	F	F	F	-	-	F	F	F	F	F	F	F	F	F	F	F	F	F	F	F	F	F	F	F	F	F
AT1G02060	F	F	F	F	F	F	F	F	F	F	-	F	F	F	F	F	F	F	F	F	-	-	F	F	F	F	F	F	F	F	F	F	F	F	F	F	F	F	F	F	F	F	F
AT1G02065	F	F	F	F	F	F	F	F	F	F	-	F	F	F	F	F	F	F	F	F	-	-	F	F	F	F	F	F	F	F	F	F	F	F	F	F	F	F	F	F	F	F	F
AT1G02070	F	F	F	F	F	F	F	F	F	F	-	F	F	F	F	F	F	F	F	F	-	-	F	F	F	F	F	F	F	F	F	F	F	F	F	F	F	F	F	F	F	F	F
AT1G02074	F	F	F	F	F	F	F	F	F	F	-	F	F	F	F	F	F	F	F	F	-	-	F	F	F	F	F	F	F	F	F	F	F	F	F	F	F	F	F	F	F	F	F
AT1G02080	F	F	F	F	F	F	F	F	F	F	-	F	F	F	F	F	F	F	F	F	-	-	F	F	F	F	F	F	F	F	F	F	F	F	F	F	F	F	F	F	F	F	F
AT1G02090	F	F	F	F	F	F	F	F	F	F	-	F	F	F	F	F	F	F	F	F	-	-	F	F	F	F	F	F	F	F	F	F	F	F	F	F	F	F	F	F	F	F	F
AT1G02100	F	F	F	F	F	F	F	F	F	F	-	F	F	F	F	F	F	F	F	F	-	-	F	F	F	F	F	F	F	F	F	F	F	F	F	F	F	F	F	F	F	F	F
AT1G02110	F	F	F	F	F	F	F	F	F	F	-	F	F	F	F	F	F	F	F	F	-	-	F	F	F	F	F	F	F	F	F	F	F	F	F	F	F	F	F	F	F	F	F
AT1G02120	F	F	F	F	F	F	F	F	F	F	-	F	F	F	F	F	F	F	F	F	-	-	F	F	F	F	F	F	F	F	F	F	F	F	F	F	F	F	F	F	F	F	F
AT1G02130	F	F	F	F	F	F	F	F	F	F	-	F	F	F	F	F	F	F	F	F	-	-	F	F	F	F	F	F	F	F	F	F	F	F	F	F	F	F	F	F	F	F	F
AT1G02136	F	F	F	F	F	F	F	F	F	F	-	F	F	F	F	F	F	F	F	F	-	-	F	F	F	F	F	F	F	F	F	F	F	F	F	F	F	F	F	F	F	F	F
AT1G02140	F	F	F	F	F	F	F	F	F	F	-	F	F	F	F	F	F	F	F	F	-	-	F	F	F	F	F	F	F	F	F	F	F	F	F	F	F	F	F	F	F	F	F
AT1G02145	F	F	F	F	F	F	F	F	F	F	-	F	F	F	F	F	F	F	F	F	-	-	F	F	F	F	F	F	F	F	F	F	F	F	F	F	F	F	F	F	F	F	F
AT1G02150	F	F	F	F	F	F	F	F	F	F	-	F	F	F	F	F	F	F	F	F	-	-	F	F	F	F	F	F	F	F	F	F	F	F	F	F	F	F	F	F	F	F	F
AT1G02160	F	F	F	F	F	F	F	F	F	F	-	F	F	F	F	F	F	F	F	F	-	-	F	F	F	F	F	F	F	F	F	F	F	F	F	F	F	F	F	F	F	F	F
AT1G02170	F	F	F	F	F	F	F	F	F	F	-	F	F	F	F	F	F	F	F	F	-	-	F	F	F	F	F	F	F	F	F	F	F	F	F	F	F	F	F	F	F	F	F
AT1G02180	F	F	F	F	F	F	F	F	F	F	-	F	F	F	F	F	F	F	F	F	-	-	F	F	F	F	F	F	F	F	F	F	F	F	F	F	F	F	F	F	F	F	F
AT1G02190	F	F	F	F	F	F	F	F	F	F	-	F	F	F	F	F	F	F	F	F	-	-	F	F	F	F	F	F	F	F	F	F	F	F	F	F	F	F	F	F	F	F	F
AT1G02205	F	F	F	F	F	F	F	F	F	F	-	F	F	F	F	F	F	F	F	F	-	-	F	F	F	F	F	F	F	F	F	F	F	F	F	F	F	F	F	F	F	F	F
AT1G02210	F	F	F	F	F	F	F	F	F	F	-	F	F	F	F	F	F	F	F	F	-	-	F	F	F	F	F	F	F	F	F	F	F	F	F	F	F	F	F	F	F	F	F
AT1G02220	F	F	F	F	F	F	F	F	F	F	-	F	F	F	F	F	F	F	F	F	-	-	F	F	F	F	F	F	F	F	F	F	F	F	F	F	F	F	F	F	F	F	F
AT1G02228	F	F	F	F	F	F	F	F	F	F	-	F	F	F	F	F	F	F	F	F	-	-	F	F	F	F	F	F	F	F	F	F	F	F	F	F	F	F	F	F	F	F	F
AT1G02230	F	F	F	F	F	F	F	F	F	F	-	F	F	F	F	F	F	F	F	F	-	-	F	F	F	F	F	F	F	F	F	F	F	F	F	F	F	F	F	F	F	F	F
AT1G02250	F	F	F	F	F	F	F	F	F	F	-	F	F	F	F	F	F	F	F	F	-	-	F	F	F	F	F	F	F	F	F	F	F	F	F	F	F	F	F	F	F	F	F
AT1G02260	F	F	F	F	F	F	F	F	F	F	-	F	F	F	F	F	F	F	F	F	-	-	F	F	F	F	F	F	F	F	F	F	F	F	F	F	F	F	F	F	F	F	F
AT1G02270	F	F	F	F	F	F	F	F	F	F	-	F	F	F	F	F	F	F	F	F	-	-	F	F	F	F	F	F	F	F	F	F	F	F	F	F	F	F	F	F	F	F	F
AT1G02280	F	F	F	F	F	F	F	F	F	F	-	F	F	F	F	F	F	F	F	F	-	-	F	F	F	F	F	F	F	F	F	F	F	F	F	F	F	F	F	F	F	F	F
AT1G02290	F	F	F	F	F	F	F	F	F	F	-	F	F	F	F	F	F	F	F	F	-	-	F	F	F	F	F	F	F	F	F	F	F	F	F	F	F	F	F	F	F	F	F
AT1G02300	F	F	F	F	F	F	F	F	F	F	-	F	F	F	F	F	F	F	F	F	-	-	F	F	F	F	F	F	F	F	F	F	F	F	F	F	F	F	F	F	F	F	F
AT1G02305	F	F	F	F	F	F	F	F	F	F	-	F	F	F	F	F	F	F	F	F	-	-	F	F	F	F	F	F	F	F	F	F	F	F	F	F	F	F	F	F	F	F	F
AT1G02310	F	F	F	F	F	F	F	F	F	F	-	F	F	F	F	F	F	F	F	F	-	-	F	F	F	F	F	F	F	F	F	F	F	F	F	F	F	F	F	F	F	F	F
AT1G02330	F	F	F	F	F	F	F	F	F	F	-	F	F	F	F	F	F	F	F	F	-	-	F	F	F	F	F	F	F	F	F	F	F	F	F	F	F	F	F	F	F	F	F
AT1G02335	F	F	F	F	F	F	F	F	F	F	-	F	F	F	F	F	F	F	F	F	-	-	F	F	F	F	F	F	F	F	F	F	F	F	F	F	F	F	F	F	F	F	F
AT1G02340	F	F	F	F	F	F	F	F	F	F	-	F	F	F	F	F	F	F	F	F	-	-	F	F	F	F	F	F	F	F	F	F	F	F	F	F	F	F	F	F	F	F	F
AT1G02350	F	F	F	F	F	F	F	F	F	F	-	F	F	F	F	F	F	F	F	F	-	-	F	F	F	F	F	F	F	F	F	F	F	F	F	F	F	F	F	F	F	F	F
AT1G02360	F	F	F	F	F	F	F	F	F	F	-	F	F	F	F	F	F	F	F	F	-	-	F	F	F	F	F	F	F	F	F	F	F	F	F	F	F	F	F	F	F	F	F
AT1G02370	F	F	F	F	F	F	F	F	F	F	-	F	F	F	F	F	F	F	F	F	-	-	F	F	F	F	F	F	F	F	F	F	F	F	F	F	F	F	F	F	F	F	F
AT1G02380	F	F	F	F	F	F	F	F	F	F	-	F	F	F	F	F	F	F	F	F	-	-	F	F	F	F	F	F	F	F	F	F	F	F	F	F	F	F	F	F	F	F	F
AT1G02390	F	F	F	F	F	F	F	F	F	F	-	F	F	F	F	F	F	F	F	F	-	-	F	F	F	F	F	F	F	F	F	F	F	F	F	F	F	F	F	F	F	F	F
AT1G02391	F	F	F	F	F	F	F	F	F	F	-	F	F	F	F	F	F	F	F	F	-	-	F	F	F	F	F	F	F	F	F	F	F	F	F	F	F	F	F	F	F	F	F
AT1G02400	F	F	F	F	F	F	F	F	F	F	-	F	F	F	F	F	F	F	F	F	-	-	F	F	F	F	F	F	F	F	F	F	F	F	F	F	F	F	F	F	F	F	F
AT1G02405	F	F	F	F	F	F	F	F	F	F	-	F	F	F	F	F	F	F	F	F	-	-	F	F	F	F	F	F	F	F	F	F	F	F	F	F	F	F	F	F	F	F	F
AT1G02410	F	F	F	F	F	F	F	F	F	F	-	F	F	F	F	F	F	F	F	F	-	-	F	F	F	F	F	F	F	F	F	F	F	F	F	F	F	F	F	F	F	F	F
AT1G02420	F	F	F	F	F	F	F	F	F	F	-	F	F	F	F	F	F	F	F	F	-	-	F	F	F	F	F	F	F	F	F	F	F	F	F	F	F	F	F	F	F	F	F
AT1G02430	F	F	F	F	F	F	F	F	F	F	-	F	F	F	F	F	F	F	F	F	-	-	F	F	F	F	F	F	F	F	F	F	F	F	F	F	F	F	F	F	F	F	F
AT1G02440	F	F	F	F	F	F	F	F	F	F	-	F	F	F	F	F	F	F	F	F	-	-	F	F	F	F	F	F	F	F	F	F	F	F	F	F	F	F	F	F	F	F	F
AT1G02450	F	F	F	F	F	F	F	F	F	F	-	F	F	F	F	F	F	F	F	F	-	-	F	F	F	F	F	F	F	F	F	F	F	F	F	F	F	F	F	F	F	F	F
AT1G02460	F	F	F	F	F	F	F	F	T	F	-	F	F	F	F	F	F	F	F	F	-	-	F	F	F	F	F	F	F	F	F	F	F	F	F	F	F	F	F	F	F	F	F
AT1G02475	F	F	F	F	F	F	F	F	F	F	-	F	F	F	F	F	F	F	F	F	-	-	F	F	F	F	F	F	F	F	F	F	F	F	F	F	F	F	F	F	F	F	F
AT1G02480	F	F	F	F	F	F	F	F	F	F	-	F	F	F	F	F	F	F	F	F	-	-	F	F	F	F	F	F	F	F	F	F	F	F	F	F	F	F	F	F	F	F	F
AT1G02490	F	F	F	F	F	F	F	F	F	F	-	F	F	F	F	F	F	F	F	F	-	-	F	F	F	F	F	F	F	F	F	F	F	F	F	F	F	F	F	F	F	F	F
AT1G02500	F	F	F	F	F	F	F	F	F	F	-	F	F	F	F	F	F	F	F	F	-	-	F	T	F	F	F	F	F	F	F	F	F	F	F	F	F	F	F	F	F	F	F
AT1G02510	F	F	F	F	F	F	F	F	F	F	-	F	F	F	F	F	F	F	F	F	-	-	F	F	F	F	F	F	F	F	F	F	F	F	F	F	F	F	F	F	F	F	F
AT1G02520	F	F	F	F	F	F	F	F	F	F	-	F	F	F	F	F	F	F	F	F	-	-	F	F	F	F	F	F	F	F	F	F	F	F	F	F	F	F	F	F	F	F	F
AT1G02530	F	F	F	F	F	F	F	F	F	F	-	F	F	F	F	F	F	F	F	F	-	-	F	F	F	F	F	F	F	F	F	F	F	F	F	F	F	F	F	F	F	F	F
AT1G02540	F	F	F	F	F	F	F	F	F	F	-	F	F	F	F	F	F	F	F	F	-	-	F	F	F	F	F	F	F	F	F	F	F	F	F	F	F	F	F	F	F	F	F
AT1G02550	F	F	F	F	F	F	F	F	F	F	-	F	F	F	F	F	F	F	F	F	-	-	F	F	F	F	F	F	F	F	F	F	F	F	F	F	F	F	F	F	F	F	F
AT1G02560	F	F	F	F	F	F	F	F	F	F	-	F	F	F	F	F	F	F	F	F	-	-	F	F	F	F	F	F	F	F	F	F	F	F	F	F	F	F	F	F	F	F	F
AT1G02570	F	F	F	F	F	F	F	F	F	F	-	F	F	F	F	F	F	F	F	F	-	-	F	F	F	F	F	F	F	F	F	F	F	F	F	F	F	F	F	F	F	F	F
AT1G02580	F	F	F	F	F	F	F	F	F	F	-	F	F	F	F	F	F	F	F	F	-	-	F	F	F	F	F	F	F	F	F	F	F	F	F	F	F	F	F	F	F	F	F
AT1G02590	F	F	F	F	F	F	F	F	F	F	-	F	F	F	F	F	F	F	F	F	-	-	F	F	F	F	F	F	F	F	F	F	F	F	F	F	F	F	F	F	F	F	F
AT1G02600	F	F	F	F	F	F	F	F	F	F	-	F	F	F	F	F	F	F	F	F	-	-	F	F	F	F	F	F	F	F	F	F	F	F	F	F	F	F	F	F	F	F	F
AT1G02610	F	F	F	F	F	F	F	F	F	F	-	F	F	F	F	F	F	F	F	T	-	-	F	F	F	F	F	F	F	F	F	F	F	F	F	F	F	F	F	F	F	F	F
AT1G02620	F	F	F	F	F	F	F	F	F	F	-	F	F	F	F	F	F	F	F	F	-	-	F	F	F	F	F	F	F	F	F	F	F	F	F	F	F	F	F	F	F	F	F
AT1G02630	F	F	F	F	F	F	F	F	F	F	-	F	F	F	F	F	F	F	F	F	-	-	F	F	F	F	F	F	F	F	F	F	F	F	F	F	F	F	F	F	F	F	F
AT1G02640	F	F	F	F	F	F	F	F	F	F	-	F	F	F	F	F	F	F	F	F	-	-	F	F	F	F	F	F	F	F	F	F	F	F	F	F	F	F	F	F	F	F	F
AT1G02650	F	F	F	F	F	F	F	F	F	F	-	F	F	F	F	F	F	F	F	F	-	-	F	F	F	F	F	F	F	F	F	F	F	F	F	F	F	F	F	F	F	F	F
AT1G02660	F	F	F	F	F	F	F	F	F	F	-	F	F	F	F	F	F	F	F	F	-	-	F	F	F	F	F	F	F	F	F	F	F	F	F	F	F	F	F	F	F	F	F
AT1G02670	F	F	F	F	F	F	F	F	F	F	-	F	F	F	F	F	F	F	F	F	-	-	F	F	F	F	F	F	F	F	F	F	F	F	F	F	F	F	F	F	F	F	F
AT1G02680	F	F	F	F	F	F	F	F	F	F	-	F	F	F	F	F	F	F	F	F	-	-	F	F	F	F	F	F	F	F	F	F	F	F	F	F	F	F	F	F	F	F	F
AT1G02690	F	F	F	F	F	F	F	F	F	F	-	F	F	F	F	F	F	F	F	F	-	-	F	F	F	F	F	F	F	F	F	F	F	F	F	F	F	F	F	F	F	F	F
AT1G02700	F	F	F	F	F	F	F	F	F	F	-	F	F	F	F	F	F	F	F	F	-	-	F	F	F	F	F	F	F	F	F	F	F	F	F	F	F	F	F	F	F	F	F
AT1G02710	F	F	F	F	F	F	F	F	F	F	-	F	F	F	F	F	F	F	F	F	-	-	F	F	F	F	F	F	F	F	F	F	F	F	F	F	F	F	F	F	F	F	F
AT1G02720	F	F	F	F	F	F	F	F	F	F	-	F	F	F	F	F	F	F	F	F	-	-	F	F	F	F	F	F	F	F	T	F	F	F	F	F	F	F	F	F	F	F	F
AT1G02730	F	F	F	F	F	F	F	F	F	F	-	F	F	F	F	F	F	F	F	F	-	-	F	F	F	F	F	F	F	F	T	F	F	F	F	F	F	F	F	F	F	F	F
AT1G02740	F	F	F	F	F	F	F	F	F	F	-	F	F	F	F	F	F	F	F	F	-	-	F	F	F	F	F	F	F	F	F	F	F	F	F	F	F	F	F	F	F	F	F
AT1G02750	F	F	F	F	F	F	F	F	F	F	-	F	F	F	F	F	F	F	F	F	-	-	F	F	F	F	F	F	F	F	F	F	F	F	F	F	F	F	F	F	F	F	F
AT1G02760	F	F	F	F	F	F	F	F	F	F	-	F	F	F	F	F	F	F	F	F	-	-	F	F	F	F	F	F	F	F	F	F	F	F	F	F	F	F	F	F	F	F	F
AT1G02770	F	F	F	F	F	F	F	F	F	F	-	F	F	F	F	F	F	F	F	F	-	-	F	F	F	F	F	F	F	F	F	F	F	F	F	F	F	F	F	F	F	F	F
AT1G02780	F	F	F	F	F	F	F	F	F	F	-	F	F	F	F	F	F	F	F	F	-	-	F	F	F	F	F	F	F	F	F	F	F	F	F	F	F	F	F	F	F	F	F
AT1G02790	F	F	F	F	F	F	F	F	F	F	-	F	F	F	F	F	F	F	F	F	-	-	F	F	F	F	F	F	F	F	F	F	F	F	F	F	F	F	F	F	F	F	F
AT1G02800	F	F	F	F	F	F	F	F	F	F	-	F	F	F	F	F	F	F	F	F	-	-	F	F	F	F	F	F	F	F	F	F	F	F	F	F	F	F	F	F	F	F	F
AT1G02810	F	F	F	F	F	F	F	F	F	F	-	F	F	F	F	F	F	F	F	F	-	-	F	F	F	F	F	F	F	F	F	F	F	F	F	F	F	F	F	F	F	F	F
AT1G02813	F	F	F	F	F	F	F	F	F	F	-	F	F	F	F	F	F	F	F	F	-	-	F	F	F	F	F	F	F	F	F	F	F	F	F	F	F	F	F	F	F	F	F
AT1G02816	F	F	F	F	F	F	F	F	F	F	-	F	F	F	F	F	F	F	F	F	-	-	F	F	F	F	F	F	F	F	F	F	F	F	F	F	F	F	F	F	F	F	F
AT1G02820	F	F	F	F	F	F	F	F	F	F	-	F	F	F	F	F	F	F	F	F	-	-	F	F	F	F	F	F	F	F	F	F	F	F	F	F	F	F	F	F	F	F	F
AT1G02830	F	F	F	F	F	F	F	F	F	F	-	F	F	F	F	F	F	F	F	F	-	-	F	F	F	F	F	F	F	F	F	F	F	F	F	F	F	F	F	F	F	F	F
AT1G02840	F	F	F	F	F	F	F	F	F	F	-	F	F	F	F	F	F	F	F	F	-	-	F	F	F	F	F	F	F	F	F	F	F	F	F	F	F	F	F	F	F	F	F
AT1G02850	F	F	F	F	F	F	F	F	F	F	-	F	F	F	F	F	F	F	F	F	-	-	F	F	F	F	F	F	F	F	F	F	F	F	F	F	F	F	F	F	F	F	F
AT1G02860	F	F	F	F	F	F	F	F	F	F	-	F	F	F	F	F	F	F	F	F	-	-	F	F	F	F	F	F	F	F	F	F	F	F	F	F	F	F	F	F	F	F	F
AT1G02870	F	F	F	F	F	F	F	F	F	F	-	F	F	F	F	F	F	F	F	F	-	-	F	F	F	F	F	F	F	F	F	F	F	F	F	F	F	F	F	F	F	F	F
AT1G02880	F	F	F	F	F	F	F	F	F	F	-	F	F	F	F	F	F	F	F	F	-	-	F	F	F	F	F	F	F	F	F	F	F	F	F	F	F	F	F	F	F	F	F
AT1G02890	F	F	F	F	F	F	F	F	F	F	-	F	F	F	F	F	F	F	F	F	-	-	F	F	F	F	F	F	F	F	F	F	F	F	F	F	F	F	F	F	F	F	F
AT1G02900	F	F	F	F	F	F	F	F	F	F	-	F	F	F	F	F	F	F	F	F	-	-	F	F	F	F	F	F	F	F	F	F	F	F	F	F	F	F	F	F	F	F	F
AT1G02910	F	F	F	F	F	F	F	F	F	F	-	F	F	F	F	F	F	F	F	F	-	-	F	F	F	F	F	F	F	F	F	F	F	F	F	F	F	F	F	F	F	F	F
AT1G02920	F	F	F	F	F	F	F	F	F	F	-	F	F	F	F	F	F	F	F	F	-	-	F	F	F	F	F	F	F	F	F	F	F	F	F	F	F	F	F	F	F	F	F
AT1G02930	F	F	F	F	F	F	F	F	F	F	-	F	F	F	F	F	F	F	F	F	-	-	F	F	F	F	F	F	F	F	F	F	F	F	F	F	F	F	F	F	F	F	F
AT1G02940	F	F	F	F	F	F	F	F	F	F	-	F	F	F	F	F	F	F	F	F	-	-	F	F	F	F	F	F	F	F	F	F	F	F	F	F	F	F	F	F	F	F	F
AT1G02950	F	F	F	F	F	F	F	F	F	F	-	F	F	F	F	F	F	F	F	F	-	-	F	F	F	F	F	F	F	F	F	F	F	F	F	F	F	F	F	F	F	F	F
AT1G02952	F	F	F	F	F	F	F	F	F	F	-	F	F	F	F	F	F	F	F	F	-	-	F	F	F	F	F	F	F	F	F	F	F	F	F	F	F	F	F	F	F	F	F
AT1G02960	F	F	F	F	F	F	F	F	F	F	-	F	F	F	F	F	F	F	F	F	-	-	F	F	F	F	F	F	F	F	F	F	F	F	F	F	F	F	F	F	F	F	F
AT1G02965	F	F	F	F	F	F	F	F	F	F	-	F	F	F	F	F	F	F	F	F	-	-	F	F	F	F	F	F	F	F	F	F	F	F	F	F	F	F	F	F	F	F	F
AT1G02970	F	F	F	F	F	F	F	F	F	F	-	F	F	F	F	F	F	F	F	F	-	-	F	F	F	F	F	F	F	F	F	F	F	F	F	F	F	F	F	F	F	F	F
AT1G02980	F	F	F	F	F	F	F	F	F	F	-	F	F	F	F	F	F	F	F	F	-	-	F	F	F	F	F	F	F	F	F	F	F	F	F	F	F	F	F	F	F	F	F
AT1G02990	F	F	F	F	F	F	F	F	F	T	-	F	F	T	F	F	F	F	F	F	-	-	F	F	F	F	F	F	F	F	F	F	F	F	F	F	F	F	F	F	F	F	F
AT1G03000	F	F	F	F	F	F	F	F	F	F	-	F	F	F	F	F	F	F	F	F	-	-	F	F	F	F	F	F	F	F	F	F	F	F	F	F	F	F	F	F	F	F	F
AT1G03010	F	F	F	F	F	F	F	F	F	F	-	F	F	F	F	F	F	F	F	F	-	-	F	F	F	F	F	F	F	F	F	F	F	F	F	F	F	F	F	F	F	F	F
AT1G03020	F	F	F	F	F	F	F	F	F	F	-	F	F	F	F	F	F	F	F	F	-	-	F	F	F	F	F	F	F	F	F	F	F	F	F	F	F	F	F	F	F	F	F
AT1G03022	F	F	F	F	F	F	F	F	F	F	-	F	F	F	F	F	F	F	F	F	-	-	F	F	F	F	F	F	F	F	F	F	F	F	F	F	F	F	F	F	F	F	F
AT1G03030	F	F	F	F	F	F	F	F	F	F	-	F	F	F	F	F	F	F	F	F	-	-	F	F	F	F	F	F	F	F	F	F	F	F	F	F	F	F	F	F	F	F	F
AT1G03040	F	F	F	F	F	F	F	F	F	F	-	F	F	F	F	F	F	F	F	F	-	-	F	F	F	F	F	F	F	F	F	F	F	F	F	F	F	F	F	F	F	F	F
AT1G03050	F	F	F	F	F	F	F	F	F	F	-	F	F	F	F	F	F	F	F	F	-	-	F	F	F	F	F	F	F	F	F	F	F	F	F	F	F	F	F	F	F	F	F
AT1G03055	F	F	F	F	F	F	F	F	F	F	-	F	F	F	F	F	F	F	F	F	-	-	F	F	F	F	F	F	F	F	F	F	F	F	F	F	F	F	F	F	F	F	F
AT1G03060	F	F	F	F	F	F	F	F	F	F	-	F	F	F	F	F	F	F	F	F	-	-	F	F	F	F	F	F	F	F	F	F	F	F	F	F	F	F	F	F	F	F	F
AT1G03070	F	F	F	F	F	F	F	F	F	F	-	F	F	F	F	F	F	F	F	F	-	-	F	F	F	F	F	F	F	F	F	F	F	F	F	F	F	F	F	F	F	F	F
AT1G03080	F	F	F	F	F	F	F	F	F	F	-	F	F	F	F	F	F	F	F	F	-	-	F	F	F	F	F	F	F	F	F	F	F	F	F	F	F	F	F	F	F	F	F
AT1G03090	F	F	F	F	F	F	F	F	F	F	-	F	F	F	F	F	F	F	F	F	-	-	F	F	F	F	F	F	F	F	F	F	F	F	F	F	F	F	F	F	F	F	F
AT1G03100	F	F	F	F	F	F	F	F	F	F	-	F	F	F	F	F	F	F	F	F	-	-	F	F	F	F	F	F	F	F	F	F	F	F	F	F	F	F	F	F	F	F	F
AT1G03103	F	F	F	F	F	F	F	F	F	F	-	F	F	F	F	F	F	F	F	F	-	-	F	F	F	F	F	F	F	F	F	F	F	F	F	F	F	F	F	F	F	F	F
AT1G03106	F	F	F	F	F	F	F	F	F	F	-	F	F	F	F	F	F	F	F	F	-	-	F	F	F	F	F	F	F	F	F	F	F	F	F	F	F	F	F	F	F	F	F
AT1G03110	F	F	F	F	F	F	F	F	F	F	-	F	F	F	F	F	F	F	F	F	-	-	F	F	F	F	F	F	F	F	F	F	F	F	F	F	F	F	F	F	F	F	F
AT1G03120	F	F	F	F	F	F	F	F	F	F	-	F	F	F	F	F	F	F	F	F	-	-	F	F	F	F	F	F	F	F	F	F	F	F	F	F	F	F	F	F	F	F	F
AT1G03130	F	F	F	F	F	F	F	F	F	F	-	F	F	F	F	F	F	F	F	F	-	-	F	F	F	F	F	F	F	F	F	F	F	F	F	F	F	F	F	F	F	F	F
AT1G03140	F	F	F	F	F	F	F	F	F	F	-	F	F	F	F	F	F	F	F	F	-	-	F	F	F	F	F	F	F	F	F	F	F	F	F	F	F	F	F	F	F	F	F
AT1G03150	F	F	F	F	F	F	F	F	F	F	-	F	F	F	F	F	F	F	F	F	-	-	F	F	F	F	F	F	F	F	F	F	F	F	F	F	F	F	F	F	F	F	F
AT1G03160	F	F	F	F	F	F	F	F	F	F	-	F	F	F	F	F	F	F	F	F	-	-	F	F	F	F	F	F	F	F	F	F	F	F	F	F	F	F	F	F	F	F	F
AT1G03170	F	F	F	F	F	F	F	F	F	F	-	F	F	F	F	F	F	F	F	F	-	-	F	F	F	F	F	F	F	F	F	F	F	F	F	F	F	F	F	F	F	F	F
AT1G03180	F	F	F	F	F	F	F	F	F	F	-	F	F	F	F	F	F	F	F	F	-	-	F	F	F	F	F	F	F	F	F	F	F	F	F	F	F	F	F	F	F	F	F
AT1G03190	F	F	F	F	F	F	F	F	F	F	-	F	F	F	F	F	F	F	F	F	-	-	F	F	F	F	F	F	F	F	F	F	F	F	F	F	F	F	F	F	F	F	F
AT1G03200	F	F	F	F	F	F	F	F	F	F	-	F	F	F	F	F	F	F	F	F	-	-	F	F	F	F	F	F	F	F	F	F	F	F	F	F	F	F	F	F	F	F	F
AT1G03210	F	F	F	F	F	F	F	F	F	F	-	F	F	F	F	F	F	F	F	F	-	-	F	F	F	F	F	F	F	F	F	F	F	F	F	F	F	F	F	F	F	F	F
AT1G03220	F	F	F	F	F	F	F	F	F	F	-	F	F	F	F	F	F	F	F	F	-	-	F	F	F	F	F	F	F	F	F	F	F	F	F	F	F	F	F	F	F	F	F
AT1G03230	F	F	F	F	F	F	F	F	F	F	-	F	F	F	F	F	F	F	F	F	-	-	F	F	F	F	F	F	F	F	F	F	F	F	F	F	F	F	F	F	F	F	F
AT1G03240	F	F	F	F	F	F	F	F	F	F	-	F	F	F	F	F	F	F	F	F	-	-	F	F	F	F	F	F	F	F	F	F	F	F	F	F	F	F	F	F	F	F	F
AT1G03250	F	F	F	F	F	F	F	F	F	F	-	F	F	F	F	F	F	F	F	F	-	-	F	F	F	F	F	F	F	F	F	F	F	F	F	F	F	F	F	F	F	F	F
AT1G03260	F	F	F	F	F	F	F	F	F	F	-	F	F	F	F	F	F	F	F	F	-	-	F	F	F	F	F	F	F	F	F	F	F	F	F	F	F	F	F	F	F	F	F
AT1G03270	F	F	F	F	F	F	F	F	F	F	-	F	F	F	F	F	F	F	F	F	-	-	F	F	F	F	F	F	F	F	F	F	F	F	F	F	F	F	F	F	F	F	F
AT1G03280	F	F	F	F	F	F	F	F	F	F	-	F	F	F	F	F	F	F	F	F	-	-	F	F	F	F	F	F	F	F	F	F	F	F	F	F	F	F	F	F	F	F	F
AT1G03290	F	F	F	F	F	F	F	F	F	F	-	F	F	F	F	F	F	F	F	F	-	-	F	F	F	F	F	F	F	F	F	F	F	F	F	F	F	F	F	F	F	F	F
AT1G03300	F	F	F	F	F	F	F	F	F	F	-	F	F	F	F	F	F	F	F	F	-	-	F	F	F	F	F	F	F	F	F	F	F	F	F	F	F	F	F	F	F	F	F
AT1G03310	F	F	F	F	F	F	F	F	F	F	-	F	F	F	F	F	F	F	F	F	-	-	F	F	F	F	F	F	F	F	F	F	F	F	F	F	F	F	F	F	F	F	F
AT1G03320	F	F	F	F	F	F	F	F	F	F	-	F	F	F	F	F	F	F	F	F	-	-	F	F	F	F	F	F	F	F	F	F	F	F	F	F	F	F	F	F	F	F	F
AT1G03330	F	F	F	F	F	F	F	F	F	F	-	F	F	F	F	F	F	F	F	F	-	-	F	F	F	F	F	F	F	F	F	F	F	F	F	F	F	F	F	F	F	F	F
AT1G03340	F	F	F	F	F	F	F	F	F	F	-	F	F	F	F	F	F	F	F	F	-	-	F	F	F	F	F	F	F	F	F	F	F	F	F	F	F	F	F	F	F	F	F
AT1G03350	F	F	F	F	F	F	F	F	F	F	-	F	F	F	F	F	F	F	F	F	-	-	F	F	F	F	F	F	F	F	F	F	F	F	F	F	F	F	F	F	F	F	F
AT1G03360	F	F	F	F	F	F	F	F	F	F	-	F	F	F	F	F	F	F	F	F	-	-	F	F	F	F	F	F	F	F	F	F	F	F	F	F	F	F	F	F	F	F	F
AT1G03370	F	F	F	F	F	F	F	F	F	F	-	F	F	F	F	F	F	F	F	F	-	-	F	F	F	F	F	F	F	F	F	F	F	F	F	F	F	F	F	F	F	F	F
AT1G03380	F	F	F	F	F	F	F	F	F	F	-	F	F	F	F	F	F	F	F	F	-	-	F	F	F	F	F	F	F	F	F	F	F	F	F	F	F	F	F	F	F	F	F
AT1G03390	F	F	F	F	F	F	F	F	F	F	-	F	F	F	F	F	F	F	F	F	-	-	F	F	F	F	F	F	F	F	F	F	F	F	F	F	F	F	F	F	F	F	F
AT1G03400	F	F	F	F	F	F	F	F	F	F	-	F	F	F	F	F	F	F	F	F	-	-	F	F	F	F	F	F	F	F	F	F	F	F	F	F	F	F	F	F	F	F	F
AT1G03410	F	F	F	F	F	F	F	F	F	F	-	F	F	F	F	F	F	F	F	F	-	-	F	F	F	F	F	F	F	F	F	F	F	F	F	F	F	F	F	F	F	F	F
AT1G03420	F	F	F	F	F	F	F	F	F	F	-	F	F	F	F	F	F	F	F	F	-	-	F	F	F	F	F	F	F	F	F	F	F	F	F	F	F	F	F	F	F	F	F
AT1G03430	F	F	F	F	F	F	F	F	F	F	-	F	F	F	F	F	F	F	F	F	-	-	F	F	F	F	F	F	F	F	F	F	F	F	F	F	F	F	F	F	F	F	F
AT1G03440	F	F	F	F	F	F	F	F	F	F	-	F	F	F	F	F	F	F	F	F	-	-	F	F	F	F	F	F	F	F	F	F	F	F	F	F	F	F	F	F	F	F	F
AT1G03445	F	F	F	F	F	F	F	F	F	F	-	F	F	F	F	F	F	F	F	F	-	-	F	F	F	F	F	F	F	F	F	F	F	F	F	F	F	F	F	F	F	F	F
AT1G03457	F	F	F	F	F	F	F	F	F	F	-	F	F	F	F	F	F	F	F	F	-	-	F	F	F	F	F	F	F	F	F	F	F	F	F	F	F	F	F	F	F	F	F
AT1G03470	F	F	F	F	F	F	F	F	F	F	-	F	F	F	F	F	F	F	F	F	-	-	F	F	F	F	F	F	F	F	F	F	F	F	F	F	F	F	F	F	F	F	F
AT1G03475	F	F	F	F	F	F	F	F	F	F	-	F	F	F	F	F	F	F	F	F	-	-	F	F	F	F	F	F	F	F	F	F	F	F	F	F	F	F	F	F	F	F	F
AT1G03490	F	F	F	F	F	F	F	F	F	F	-	F	F	F	F	F	F	F	F	F	-	-	F	F	F	F	F	F	F	F	F	F	F	F	F	F	F	F	F	F	F	F	F
AT1G03495	F	F	F	F	F	F	F	F	F	F	-	F	F	F	F	F	F	F	F	F	-	-	F	F	F	F	F	F	F	F	F	F	F	F	F	F	F	F	F	F	F	F	F
AT1G03502	F	F	F	F	F	F	F	F	F	F	-	F	F	F	F	F	F	F	F	F	-	-	F	F	F	F	F	F	F	F	F	F	F	F	F	F	F	F	F	F	F	F	F
AT1G03506	F	F	F	F	F	F	F	F	F	F	-	F	F	F	F	F	F	F	F	F	-	-	F	F	F	F	F	F	F	F	F	F	F	F	F	F	F	F	F	F	F	F	F
AT1G03510	F	F	F	F	F	F	F	F	F	F	-	F	F	F	F	F	F	F	F	F	-	-	F	F	F	F	F	F	F	F	F	F	F	F	F	F	F	F	F	F	F	F	F
AT1G03515	F	F	F	F	F	F	F	F	F	F	-	F	F	F	F	F	F	F	F	F	-	-	F	F	F	F	F	F	F	F	F	F	F	F	F	F	F	F	F	F	F	F	F
AT1G03520	F	F	F	F	F	F	F	F	F	F	-	F	F	F	F	F	F	F	F	F	-	-	F	F	F	F	F	F	F	F	F	F	F	F	F	F	F	F	F	F	F	F	F
AT1G03530	F	F	F	F	F	F	F	F	F	F	-	F	F	F	F	F	F	F	F	F	-	-	F	F	F	F	F	F	F	F	F	F	F	F	F	F	F	F	F	F	F	F	F
AT1G03540	F	F	F	F	F	F	F	F	F	F	-	F	F	F	F	F	F	F	F	F	-	-	F	F	F	F	F	F	F	F	F	F	F	F	F	F	F	F	F	F	F	F	F
AT1G03550	F	F	F	F	F	F	F	F	F	F	-	F	F	F	F	F	F	F	F	F	-	-	F	F	F	F	F	F	F	F	F	F	F	F	F	F	F	F	F	F	F	F	F
AT1G03560	F	F	F	F	F	F	F	F	F	F	-	F	F	F	F	F	F	F	F	F	-	-	F	F	F	F	F	F	F	F	F	F	F	F	F	F	F	F	F	F	F	F	F
AT1G03570	F	F	F	F	F	F	F	F	F	F	-	F	F	F	F	F	F	F	F	F	-	-	F	F	F	F	F	F	F	F	F	F	F	F	F	F	F	F	F	F	F	F	F
AT1G03580	F	F	F	F	F	F	F	F	F	F	-	F	F	F	F	F	F	F	F	F	-	-	F	F	F	F	F	F	F	F	F	F	F	F	F	F	F	F	F	F	F	F	F
AT1G03590	F	F	F	F	F	F	F	F	F	F	-	F	F	F	F	F	F	F	F	F	-	-	F	F	F	F	F	F	F	F	F	F	F	F	F	F	F	F	F	F	F	F	F
AT1G03600	F	F	F	F	F	F	F	F	F	F	-	F	F	F	F	F	F	F	F	F	-	-	F	F	F	F	F	F	F	F	F	F	F	F	F	F	F	F	F	F	F	F	F
AT1G03610	F	F	F	F	F	F	F	F	F	F	-	F	F	F	F	F	F	F	F	F	-	-	F	F	F	F	F	F	F	F	F	F	F	F	F	F	F	F	F	F	F	F	F
AT1G03620	F	F	F	F	F	F	F	F	F	F	-	F	F	F	F	F	F	F	F	F	-	-	F	F	F	F	F	F	F	F	F	F	F	F	F	F	F	F	F	F	F	F	F
AT1G03630	F	F	F	F	F	F	F	F	F	F	-	F	F	F	F	F	F	F	F	F	-	-	F	F	F	F	F	F	F	F	F	F	F	F	F	F	F	F	F	F	F	F	F
AT1G03640	F	F	F	F	F	F	F	F	F	F	-	F	F	F	F	F	F	F	F	F	-	-	F	F	F	F	F	F	F	F	F	F	F	F	F	F	F	F	F	F	F	F	F
AT1G03650	F	F	F	F	F	F	F	F	F	F	-	F	F	F	F	F	F	F	F	F	-	-	F	F	F	F	F	F	F	F	F	F	F	F	F	F	F	F	F	F	F	F	F
AT1G03660	F	F	F	F	F	F	F	F	F	F	-	F	F	F	F	F	F	F	F	F	-	-	F	F	F	F	F	F	F	F	F	F	F	F	F	F	F	F	F	F	F	F	F
AT1G03670	F	F	F	F	F	F	F	F	F	F	-	F	F	F	F	F	F	F	F	F	-	-	F	F	F	F	F	F	F	F	F	F	F	F	F	F	F	F	F	F	F	F	F
AT1G03680	F	F	F	F	F	F	F	F	F	F	-	F	F	F	F	F	F	F	F	F	-	-	F	F	F	F	F	F	F	F	F	F	F	F	F	F	F	F	F	F	F	F	F
AT1G03687	F	F	F	F	F	F	F	F	F	F	-	F	F	F	F	F	F	F	F	F	-	-	F	F	F	F	F	F	F	F	F	F	F	F	F	F	F	F	F	F	F	F	F
AT1G03700	F	F	F	F	F	F	F	F	F	F	-	F	F	F	F	F	F	F	F	F	-	-	F	F	F	F	F	F	F	F	F	F	F	F	F	F	F	F	F	F	F	F	F
AT1G03710	F	F	F	F	F	F	F	F	F	F	-	F	F	F	F	F	F	F	F	F	-	-	F	F	F	F	F	F	F	F	F	F	F	F	F	F	F	F	F	F	F	F	F
AT1G03720	F	F	F	F	F	F	F	F	F	F	-	F	F	F	F	F	F	F	F	F	-	-	F	F	F	F	F	F	F	F	F	F	F	F	F	F	F	F	F	F	F	F	F
AT1G03730	F	F	F	F	F	F	F	F	F	F	-	F	F	F	F	F	F	F	F	F	-	-	F	F	F	F	F	F	F	F	F	F	F	F	F	F	F	F	F	F	F	F	F
AT1G03740	F	F	F	F	F	F	F	F	F	F	-	F	F	F	F	F	F	F	F	F	-	-	F	F	F	F	F	F	F	F	F	F	F	F	F	F	F	F	F	F	F	F	F
AT1G03750	F	F	F	F	F	F	F	F	F	F	-	F	F	F	F	F	F	F	F	F	-	-	F	F	F	F	F	F	F	F	F	F	F	F	F	F	F	F	F	F	F	F	F
AT1G03760	F	F	F	F	F	F	F	F	F	F	-	F	F	F	F	F	F	F	F	F	-	-	F	F	F	F	F	F	F	F	F	F	F	F	F	F	F	F	F	F	F	T	F
AT1G03770	F	F	F	F	F	F	F	F	F	F	-	F	F	F	F	F	F	F	F	F	-	-	F	F	F	F	F	F	F	F	F	F	F	F	F	F	F	F	F	F	F	T	F
AT1G03780	F	F	F	F	F	F	F	F	F	F	-	F	F	F	F	F	F	F	F	F	-	-	F	F	F	F	F	F	F	F	F	F	F	F	F	F	F	F	F	F	F	F	F
AT1G03790	F	F	F	F	F	F	F	F	F	F	-	F	F	F	T	F	F	F	F	F	-	-	F	F	F	F	T	F	F	F	F	F	F	F	F	F	F	F	F	F	F	F	F
AT1G03800	F	F	F	F	F	F	F	F	F	F	-	F	F	F	F	F	F	F	F	F	-	-	F	F	F	F	F	F	F	F	F	F	F	F	F	F	F	F	F	F	F	F	F
AT1G03810	F	F	F	F	F	F	F	F	F	F	-	F	F	F	F	F	F	F	F	F	-	-	F	F	F	F	F	F	F	F	F	F	F	F	F	F	F	F	F	F	F	F	F
AT1G03820	F	F	F	F	F	F	F	F	F	F	-	F	F	F	F	F	F	F	F	F	-	-	F	F	F	F	F	F	F	F	F	F	F	F	F	F	F	F	F	F	F	F	F
AT1G03830	F	F	F	F	F	F	F	F	F	F	-	F	F	F	F	F	F	F	F	F	-	-	F	F	F	F	F	F	F	F	F	F	F	F	F	F	F	F	F	F	F	F	F
AT1G03840	F	F	F	F	F	F	F	F	F	F	-	F	F	F	F	F	F	F	F	F	-	-	F	F	F	F	F	F	F	F	F	F	F	F	F	F	F	F	F	F	F	F	F
AT1G03850	F	F	F	F	F	F	F	F	F	F	-	F	F	F	F	F	F	F	F	F	-	-	F	F	F	F	F	F	F	F	F	F	F	F	F	F	F	F	F	F	F	F	F
AT1G03860	F	F	F	F	F	F	F	F	F	F	-	F	F	F	F	F	F	F	F	F	-	-	F	F	F	F	F	F	F	F	F	F	F	F	F	F	F	F	F	F	F	F	F
AT1G03870	F	F	F	F	F	F	F	F	F	F	-	F	F	F	F	F	F	F	F	F	-	-	F	F	F	F	F	F	F	F	F	F	F	F	F	F	F	F	F	F	F	F	F
AT1G03890	F	F	F	F	F	F	F	F	F	F	-	F	F	F	F	F	F	F	F	F	-	-	F	F	F	F	F	F	F	F	F	F	F	F	F	F	F	F	F	F	F	F	F
AT1G03900	F	F	F	F	F	F	F	F	F	F	-	F	F	F	F	F	F	F	F	F	-	-	F	F	F	F	F	F	F	F	F	F	F	F	F	F	F	F	F	F	F	F	F
AT1G03905	F	F	F	F	F	F	F	F	F	F	-	F	F	F	F	F	F	F	F	F	-	-	F	F	F	F	F	F	F	F	F	F	F	F	F	F	F	F	F	F	F	F	F
AT1G03910	F	F	F	F	F	F	F	F	F	F	-	F	F	F	F	F	F	F	F	F	-	-	F	F	F	F	F	F	F	F	F	F	F	F	F	F	F	F	F	F	F	F	F
AT1G03920	F	F	F	F	F	F	F	F	F	F	-	F	F	F	F	F	F	F	F	F	-	-	F	F	F	F	F	F	F	F	F	F	F	F	F	F	F	F	F	F	F	F	F
AT1G03930	F	F	F	F	F	F	F	F	F	F	-	F	F	F	F	F	F	F	F	F	-	-	F	F	F	F	F	F	F	F	F	F	F	F	F	F	F	F	F	F	F	F	F
AT1G03935	F	F	F	F	F	F	F	F	F	F	-	F	F	F	F	F	F	F	F	F	-	-	F	F	F	F	F	F	F	F	F	F	F	F	F	F	F	F	F	F	F	F	F
AT1G03940	F	F	F	F	F	F	F	F	F	F	-	F	F	F	F	F	F	F	F	F	-	-	F	F	F	F	F	F	F	F	F	F	F	F	F	F	F	F	F	F	F	F	F
AT1G03950	F	F	F	F	F	F	F	F	F	F	-	F	F	F	F	F	F	F	F	F	-	-	F	F	F	F	F	F	F	F	F	F	F	F	F	F	F	F	F	F	F	F	F
AT1G03960	F	F	F	F	F	F	F	F	F	F	-	F	F	F	F	F	F	F	F	F	-	-	F	F	F	F	F	F	F	F	F	F	F	F	F	F	F	F	F	F	F	F	F
AT1G03970	F	F	F	F	F	F	F	F	F	F	-	F	F	F	F	F	F	F	F	F	-	-	F	F	F	F	F	F	F	F	F	F	F	F	F	F	F	F	F	F	F	F	F
AT1G03980	F	F	F	F	F	F	F	F	F	F	-	F	F	F	F	F	F	F	F	F	-	-	F	F	F	F	F	F	F	F	F	F	F	F	F	F	F	F	F	F	F	F	F
AT1G03982	F	F	F	F	F	F	F	F	F	F	-	F	F	F	F	F	F	F	F	F	-	-	F	F	F	F	F	F	F	F	F	F	F	F	F	F	F	F	F	F	F	F	F
AT1G03990	F	F	F	F	F	F	F	F	F	F	-	F	F	F	F	F	F	F	F	F	-	-	F	F	F	F	F	F	F	F	F	F	F	F	F	F	F	F	F	F	F	F	F
AT1G04000	F	F	F	F	F	F	F	F	F	F	-	F	F	F	F	F	F	F	F	F	-	-	F	F	F	F	F	F	F	F	F	F	F	F	F	F	F	F	F	F	F	F	F
AT1G04010	F	F	F	F	F	F	F	F	F	F	-	F	F	F	F	F	F	F	F	F	-	-	F	F	F	F	F	F	F	F	F	F	F	F	F	F	F	F	F	F	F	F	F
AT1G04020	F	F	F	F	F	F	F	F	F	F	-	F	F	F	F	F	F	F	F	F	-	-	F	F	F	F	F	F	F	F	F	F	F	F	F	F	F	F	F	F	F	F	F
AT1G04030	F	F	F	F	F	F	F	F	F	F	-	F	F	F	F	F	F	F	F	F	-	-	F	F	F	F	F	F	F	F	F	F	F	F	F	F	F	F	F	F	F	F	F
AT1G04040	F	F	F	F	F	F	F	F	F	F	-	F	F	F	F	F	F	F	F	F	-	-	F	F	F	F	F	F	F	F	F	F	F	F	F	F	F	F	F	F	F	F	F
AT1G04050	F	F	F	F	F	F	F	F	F	F	-	F	F	F	F	F	F	F	F	F	-	-	F	F	F	F	F	F	F	F	F	F	F	F	F	F	F	F	F	F	F	F	F
AT1G04070	F	F	F	F	F	F	F	F	F	F	-	F	F	F	F	F	F	F	F	F	-	-	F	F	F	F	F	F	F	F	F	F	F	F	F	F	F	F	F	F	F	F	F
AT1G04080	F	F	F	F	F	F	F	F	F	F	-	F	F	F	F	F	F	F	F	F	-	-	F	F	F	F	F	F	F	F	F	F	F	F	F	F	F	F	F	F	F	F	F
AT1G04090	F	F	F	F	F	F	F	F	F	F	-	F	F	F	F	F	F	F	F	F	-	-	F	F	F	F	F	F	F	F	F	F	F	F	F	F	F	F	F	F	F	F	F
AT1G04100	F	F	F	F	F	F	F	F	F	F	-	F	F	F	F	F	F	F	F	F	-	-	F	F	F	F	F	F	F	F	F	F	F	F	F	F	F	F	F	F	F	F	F
AT1G04110	F	F	F	F	F	F	F	F	F	F	-	F	F	F	F	F	F	F	F	F	-	-	F	F	F	F	F	F	F	F	F	F	F	F	F	F	F	F	F	F	F	F	F
AT1G04120	F	F	F	F	F	F	F	F	F	F	-	F	F	F	F	F	F	F	F	F	-	-	F	F	F	F	F	F	F	F	F	F	F	F	F	F	F	F	F	F	F	F	F
AT1G04130	F	F	F	F	F	F	F	F	F	F	-	F	F	F	F	F	F	F	F	F	-	-	F	F	F	F	F	F	F	F	F	F	F	F	F	F	F	F	F	F	F	F	F
AT1G04140	F	F	F	F	F	F	F	F	F	F	-	F	F	F	F	F	F	F	F	F	-	-	F	F	F	F	F	F	F	F	F	F	F	F	F	F	F	F	F	F	F	F	F
AT1G04150	F	F	F	F	F	F	F	F	F	F	-	F	F	F	F	F	F	F	F	F	-	-	F	F	F	F	F	F	F	F	F	F	F	F	F	F	F	F	F	F	F	F	F
AT1G04160	F	F	F	F	F	F	F	F	F	F	-	F	F	F	F	F	F	F	F	F	-	-	F	F	F	F	F	F	F	F	F	F	F	F	F	F	F	F	F	F	F	F	F
AT1G04170	F	F	F	F	F	F	F	F	F	F	-	F	F	F	F	F	F	F	F	F	-	-	F	F	F	F	F	F	F	F	F	F	F	F	F	F	F	F	F	F	F	F	F
AT1G04171	F	F	F	F	F	F	F	F	F	F	-	F	F	F	F	F	F	F	F	F	-	-	F	F	F	F	F	F	F	F	F	F	F	F	F	F	F	F	F	F	F	F	F
AT1G04180	F	F	F	F	F	F	F	F	F	F	-	F	F	F	F	F	F	F	F	F	-	-	F	F	F	F	F	F	F	F	F	F	F	F	F	F	F	F	F	F	F	F	F
AT1G04190	F	F	F	F	F	F	F	F	F	F	-	F	F	F	F	F	F	F	F	F	-	-	F	F	F	F	F	F	F	F	F	F	F	F	F	F	F	F	F	F	F	F	F
AT1G04200	F	F	F	F	F	F	F	F	F	F	-	F	F	F	F	F	F	F	F	F	-	-	F	F	F	F	F	F	T	F	F	F	F	F	F	F	F	F	F	F	F	F	F
AT1G04210	F	F	F	F	F	F	F	F	F	F	-	F	F	F	F	F	F	F	F	F	-	-	F	F	F	F	T	F	T	F	F	F	F	F	F	F	F	F	F	F	F	F	F
AT1G04220	F	F	F	F	F	F	F	F	F	F	-	F	F	F	F	F	F	F	F	F	-	-	F	F	F	F	T	F	T	F	F	F	F	F	F	F	F	F	F	F	F	F	F
AT1G04230	F	F	F	F	F	F	F	F	F	F	-	F	F	F	F	F	F	F	F	F	-	-	F	F	F	F	F	F	F	F	F	F	F	F	F	F	F	F	F	F	F	F	F
AT1G04240	F	F	F	F	F	F	F	F	F	F	-	F	F	F	F	F	F	F	F	F	-	-	F	F	F	T	T	F	T	F	F	F	F	F	F	F	F	F	F	F	F	F	F
AT1G04250	F	F	F	F	F	F	F	F	F	F	-	F	F	F	F	F	F	F	F	F	-	-	F	F	F	F	F	F	F	F	F	F	F	F	F	F	F	F	F	F	F	F	F
AT1G04260	F	F	F	F	F	F	F	F	F	F	-	F	F	F	F	F	F	F	F	F	-	-	F	F	F	F	F	F	F	F	F	F	F	F	F	F	F	F	F	F	F	F	F
AT1G04270	F	F	F	F	F	F	F	F	F	F	-	F	F	F	F	F	F	F	F	F	-	-	F	F	F	F	F	F	F	F	F	F	F	F	F	F	F	F	F	F	F	F	F
AT1G04280	F	F	F	F	F	F	F	F	F	F	-	F	F	F	F	F	F	F	F	F	-	-	F	F	F	F	F	F	F	F	F	F	F	F	F	F	F	F	F	F	F	F	F
AT1G04290	F	F	F	F	F	F	F	F	F	F	-	F	F	F	F	F	F	F	F	F	-	-	F	F	F	F	F	F	F	F	F	F	F	F	F	F	F	F	F	F	F	F	F
AT1G04295	F	F	F	F	F	F	F	F	F	F	-	F	F	F	F	F	F	F	F	F	-	-	F	F	F	F	F	F	F	F	F	F	F	F	F	F	F	F	F	F	F	F	F
AT1G04300	F	F	F	F	F	F	F	F	F	F	-	F	F	F	F	F	F	F	F	F	-	-	F	F	F	F	F	F	F	F	F	F	F	F	F	F	F	F	F	F	F	F	F
AT1G04310	F	F	F	F	F	F	F	F	F	F	-	F	F	F	F	F	F	F	F	F	-	-	F	F	F	F	F	F	F	F	F	F	F	F	F	F	F	F	F	F	F	F	F
AT1G04320	F	F	F	F	F	F	F	F	F	F	-	F	F	F	F	F	F	F	F	F	-	-	F	F	F	F	F	F	F	F	F	F	F	F	F	F	F	F	F	F	F	F	F
AT1G04330	F	F	F	F	F	F	F	F	F	F	-	F	F	F	F	F	F	F	F	F	-	-	F	F	F	F	F	F	F	F	F	F	F	F	F	F	F	F	F	F	F	F	F
AT1G04340	F	F	F	F	F	F	F	F	F	F	-	F	F	F	F	F	F	F	F	F	-	-	F	F	F	F	F	F	F	F	F	F	F	F	F	F	F	F	F	F	F	F	F
AT1G04350	F	F	F	F	F	F	F	F	F	F	-	F	F	F	F	F	F	F	F	F	-	-	F	F	F	F	F	F	F	F	F	F	F	F	F	F	F	F	F	F	F	F	F
AT1G04360	F	F	F	F	F	F	F	F	F	F	-	F	F	F	F	F	F	F	F	F	-	-	F	F	F	F	F	F	F	F	F	F	F	F	F	F	F	F	F	F	F	F	F
AT1G04370	F	F	F	F	F	F	F	F	F	F	-	F	F	F	F	F	F	F	F	F	-	-	F	F	F	F	F	F	F	F	F	F	F	F	F	F	F	F	F	F	F	F	F
AT1G04380	F	F	F	F	F	F	F	F	F	F	-	F	F	F	F	F	F	F	F	F	-	-	F	F	F	T	F	F	F	F	F	F	F	F	F	F	F	F	F	F	F	F	F
AT1G04390	F	F	F	F	F	F	F	F	F	F	-	F	F	F	F	F	F	F	F	F	-	-	F	F	F	T	F	F	F	F	F	F	F	F	F	F	F	F	F	F	F	F	F
AT1G04400	F	F	F	F	F	F	F	F	F	F	-	F	F	F	F	F	F	F	F	F	-	-	F	F	F	T	F	F	F	F	F	F	F	F	F	F	F	F	F	F	F	F	F
AT1G04410	F	F	F	F	F	F	F	F	F	F	-	F	F	F	F	F	F	F	F	F	-	-	F	F	F	T	F	F	F	F	F	F	F	F	F	F	F	F	F	F	F	F	F
AT1G04420	F	F	F	F	F	F	F	F	F	F	-	F	F	F	F	F	F	F	F	F	-	-	F	F	F	T	F	F	F	F	F	F	F	F	F	F	F	F	F	F	F	F	F
AT1G04425	F	F	F	F	F	F	F	F	F	F	-	F	F	F	F	F	F	F	F	F	-	-	F	F	F	T	F	F	F	F	F	F	F	F	F	F	F	F	F	F	F	F	F
AT1G04430	F	F	F	F	F	F	F	F	F	F	-	F	F	F	F	F	F	F	F	F	-	-	F	F	F	F	F	F	F	F	F	F	F	F	F	F	F	F	F	F	F	F	F
AT1G04440	F	F	F	F	F	F	F	F	F	F	-	F	F	F	F	F	F	F	F	F	-	-	F	F	F	F	F	F	F	F	F	F	F	F	F	F	F	F	F	F	F	F	F
AT1G04445	F	F	F	F	F	F	F	F	F	F	-	F	F	F	F	F	F	F	F	F	-	-	F	F	F	F	F	F	F	F	F	F	F	F	F	F	F	F	F	F	F	F	F
AT1G04450	F	F	F	F	F	F	F	F	F	F	-	F	F	F	F	F	F	F	F	F	-	-	F	F	F	F	F	F	F	F	F	F	F	F	F	F	F	F	F	F	F	F	F
AT1G04470	F	F	F	F	F	F	F	F	F	F	-	F	F	F	F	F	F	F	F	F	-	-	F	F	F	F	F	F	F	F	F	F	F	F	F	F	F	F	F	F	F	F	F
AT1G04480	F	F	F	F	F	F	F	F	F	F	-	F	F	F	F	F	F	F	F	F	-	-	F	F	F	F	F	F	F	F	F	F	F	F	F	F	F	F	F	F	F	F	F
AT1G04490	F	F	F	F	F	F	F	F	F	F	-	F	F	F	F	F	F	F	F	F	-	-	F	F	F	F	F	F	F	F	F	F	F	F	F	F	F	F	F	F	F	F	F
AT1G04500	F	F	F	F	F	F	F	F	F	F	-	F	F	F	F	F	F	F	F	F	-	-	F	F	F	F	F	F	F	F	F	F	F	F	F	F	F	F	F	F	F	F	F
AT1G04501	F	F	F	F	F	F	F	F	F	F	-	F	F	F	F	F	F	F	F	F	-	-	F	F	F	F	F	F	F	F	F	F	F	F	F	F	F	F	F	F	F	F	F
AT1G04510	F	F	F	F	F	F	F	F	T	F	-	F	F	F	F	F	F	F	F	F	-	-	F	F	F	F	F	F	F	F	F	F	F	F	F	F	F	F	F	F	F	F	F
AT1G04520	F	F	F	F	F	F	F	F	F	F	-	F	F	F	F	F	F	F	F	F	-	-	F	F	F	F	F	F	F	F	F	F	F	F	F	F	F	F	F	F	F	F	F
AT1G04530	F	F	F	F	F	F	F	F	F	F	-	F	F	F	F	F	F	F	F	F	-	-	F	F	F	F	F	F	F	F	F	F	F	F	F	F	F	F	F	F	F	F	F
AT1G04540	F	F	F	F	F	F	F	F	F	F	-	F	F	F	F	F	F	F	F	F	-	-	F	F	F	F	F	F	F	F	F	F	F	F	F	F	F	F	F	F	F	F	F
AT1G04550	F	F	F	F	F	F	F	F	F	F	-	F	F	F	F	F	F	F	F	F	-	-	F	F	F	F	F	F	F	F	F	F	F	F	F	F	F	F	F	F	F	F	F
AT1G04555	F	F	F	F	F	F	F	F	F	F	-	F	F	F	F	F	F	F	F	F	-	-	F	F	F	F	F	F	F	F	F	F	F	F	F	F	F	F	F	F	F	F	F
AT1G04560	F	F	F	F	F	F	F	F	F	F	-	F	F	F	F	F	F	F	F	F	-	-	F	F	F	F	F	F	F	F	F	F	F	F	F	F	F	F	F	F	F	F	F
AT1G04570	F	F	F	F	F	F	F	F	F	F	-	F	F	F	F	F	F	F	F	F	-	-	F	F	F	F	F	F	F	F	F	F	F	F	F	F	F	F	F	F	F	F	F
AT1G04580	F	F	F	F	F	F	F	F	F	F	-	F	F	F	F	F	F	F	F	F	-	-	F	F	F	F	F	F	F	F	F	F	F	F	F	F	F	F	F	F	F	F	F
AT1G04590	F	F	F	F	F	F	F	F	F	F	-	F	F	F	F	F	F	F	F	F	-	-	F	F	F	F	F	F	F	F	F	F	F	F	F	F	F	F	F	F	F	F	F
AT1G04600	F	F	F	F	F	F	F	F	F	F	-	F	F	F	F	F	F	F	F	F	-	-	F	F	F	F	F	F	F	F	F	F	F	F	F	F	F	F	F	F	F	F	F
AT1G04610	F	F	F	F	F	F	F	F	F	F	-	F	F	F	F	F	F	F	F	F	-	-	F	F	F	F	F	F	F	F	F	F	F	F	F	F	F	F	F	F	F	F	F
AT1G04620	F	F	F	F	F	F	F	F	F	F	-	F	F	F	F	F	F	F	F	F	-	-	F	F	F	F	F	F	F	F	F	F	F	F	F	F	F	F	F	F	F	F	F
AT1G04625	F	F	F	F	F	F	F	F	F	F	-	F	F	F	F	F	F	F	F	F	-	-	F	F	F	F	F	F	F	F	F	F	F	F	F	F	F	F	F	F	F	F	F
AT1G04630	F	F	F	F	F	F	F	F	F	F	-	F	F	F	F	F	F	F	F	F	T	-	F	F	F	F	F	F	F	F	F	F	F	F	F	F	F	F	F	F	F	F	F
AT1G04635	F	F	F	F	F	F	F	F	F	F	-	F	F	F	F	F	F	F	F	F	-	-	F	F	F	F	F	F	F	F	F	F	F	F	F	F	F	F	F	F	F	F	F
AT1G04640	F	F	F	F	F	F	F	F	F	F	-	F	F	F	F	F	F	F	F	F	-	-	F	F	F	F	F	F	F	F	F	F	F	F	F	F	F	F	F	F	F	F	F
AT1G04645	F	F	F	F	F	F	F	F	F	F	-	F	F	F	F	F	F	F	F	F	-	-	F	F	F	F	F	F	F	F	F	F	F	F	F	F	F	F	F	F	F	F	F
AT1G04650	F	F	F	F	F	F	F	F	F	F	-	F	F	F	F	F	F	F	F	F	-	-	F	F	F	F	F	F	F	F	F	F	F	F	F	F	F	F	F	F	F	F	F
AT1G04660	F	F	F	F	F	F	F	F	F	F	-	F	F	F	F	F	F	F	F	F	-	-	F	F	F	F	F	F	F	F	F	F	F	F	F	F	F	F	F	F	F	F	F
AT1G04670	F	F	F	F	F	F	F	F	F	F	-	F	F	F	F	F	F	F	F	F	-	-	F	F	F	F	F	F	F	F	F	F	F	F	F	F	F	F	F	F	F	F	F
AT1G04680	F	F	F	F	F	F	F	F	F	F	-	F	F	F	F	F	F	F	F	F	-	-	F	F	F	F	F	F	F	F	F	F	F	F	F	F	F	F	F	F	F	F	F
AT1G04684	F	F	F	F	F	F	F	F	F	F	-	F	F	F	F	F	F	F	F	F	-	-	F	F	F	F	F	F	F	F	F	F	F	F	F	F	F	F	F	F	F	F	F
AT1G04690	F	F	F	F	F	F	F	F	F	F	-	F	F	F	F	F	F	F	F	F	-	-	F	F	F	F	F	F	F	F	F	F	F	F	F	F	F	F	F	F	F	F	F
AT1G04700	F	F	F	F	F	F	F	F	F	F	-	F	F	F	F	F	F	F	F	F	-	-	F	F	F	F	F	F	F	F	F	F	F	F	F	F	F	F	F	F	F	F	F
AT1G04710	F	F	F	F	F	F	F	F	F	F	-	F	F	F	F	F	F	F	F	F	-	-	F	F	F	F	F	F	F	F	F	F	F	F	F	F	F	F	F	F	F	F	F
AT1G04720	F	F	F	F	F	F	F	F	F	F	-	F	F	F	F	F	F	F	F	F	-	-	F	F	F	F	F	F	F	F	F	F	F	F	F	F	F	F	F	F	F	F	F
AT1G04730	F	F	F	F	F	F	F	F	F	F	-	F	F	F	F	F	F	F	F	F	-	-	F	F	F	F	F	F	F	F	F	F	F	F	F	F	F	F	F	F	F	F	F
AT1G04750	F	F	F	F	F	F	F	F	F	F	-	F	F	F	F	F	F	F	F	F	-	-	F	F	F	F	F	F	F	F	F	F	F	F	F	F	F	F	F	F	F	F	F
AT1G04760	F	F	F	F	F	F	F	F	F	F	-	F	F	F	F	F	F	F	F	F	-	-	F	F	F	F	F	F	F	F	F	F	F	F	F	F	F	F	F	F	F	F	F
AT1G04770	F	F	F	F	F	F	F	F	F	F	-	F	F	F	F	F	F	F	F	F	T	-	F	F	F	F	F	F	F	F	F	F	F	F	F	F	F	F	F	F	F	F	F
AT1G04778	F	F	F	F	F	F	F	F	F	F	-	F	F	F	F	F	F	F	F	F	-	-	F	F	F	F	F	F	F	F	F	F	F	F	F	F	F	F	F	F	F	F	F
AT1G04780	F	F	F	F	F	F	F	F	F	F	-	F	F	F	F	F	F	F	F	F	-	-	F	F	F	F	F	F	F	F	F	F	F	F	F	F	F	F	F	F	F	F	F
AT1G04790	F	F	F	F	F	F	F	F	F	F	-	F	F	F	F	F	F	F	F	F	-	-	F	F	F	F	F	F	F	F	F	F	F	F	F	F	F	F	F	F	F	F	F
AT1G04800	F	F	F	F	F	F	F	F	F	F	-	F	F	F	F	F	F	F	F	F	-	-	F	F	F	F	F	F	F	F	F	F	F	F	F	F	F	F	F	F	F	F	F
AT1G04810	F	F	F	F	F	F	F	F	F	F	-	F	F	F	F	F	F	F	F	F	-	-	F	F	F	F	F	F	F	F	F	F	F	F	F	F	F	F	F	F	F	F	F
AT1G04820	F	F	F	F	F	F	F	F	F	F	-	F	F	F	F	F	F	F	F	F	-	-	F	F	F	F	F	F	F	F	F	F	F	F	F	F	F	F	F	F	F	T	F
AT1G04830	F	F	F	F	F	F	F	F	F	F	-	F	F	F	F	F	T	F	F	F	-	-	F	F	F	F	F	F	F	F	F	F	F	F	F	F	F	F	F	F	T	T	F
AT1G04840	F	F	F	F	F	F	F	F	F	F	-	F	F	F	F	F	F	F	F	F	-	-	F	F	F	F	F	F	F	F	F	F	F	F	F	F	F	F	F	F	F	F	F
AT1G04850	F	F	F	F	F	F	F	F	F	F	-	F	F	F	F	F	F	F	F	F	-	-	F	F	F	F	F	F	F	F	F	F	F	F	F	F	F	F	F	F	F	F	F
AT1G04860	F	F	F	F	F	F	F	F	F	F	-	F	F	F	F	F	F	F	F	F	-	-	F	F	F	F	F	F	F	F	F	F	F	F	F	F	F	F	F	F	F	F	F
AT1G04870	F	F	F	F	F	F	F	F	F	F	-	F	F	F	F	F	F	F	F	F	-	-	F	F	F	F	F	F	F	F	F	F	F	F	F	F	F	F	F	F	F	F	F
AT1G04880	F	F	F	F	F	F	F	F	F	F	-	F	F	F	F	F	F	F	F	F	-	-	F	F	F	F	F	F	F	F	F	F	F	F	F	F	F	F	F	F	F	F	F
AT1G04890	F	F	F	F	F	F	F	F	F	F	-	F	F	F	F	F	F	F	F	F	-	-	F	F	F	F	F	F	F	F	F	F	F	F	F	F	F	F	F	F	F	F	F
AT1G04900	F	F	F	F	F	F	F	F	F	F	-	F	F	F	F	F	F	F	F	F	-	-	F	F	F	F	F	F	F	F	F	F	F	F	F	F	F	F	F	F	F	F	F
AT1G04910	F	F	F	F	F	F	F	F	F	F	-	F	F	F	F	F	F	F	F	F	-	-	F	F	F	F	F	F	F	F	F	F	F	F	F	F	F	F	F	F	F	F	F
AT1G04920	F	F	F	F	F	F	F	F	F	F	-	F	F	F	F	F	F	F	F	F	-	-	F	F	F	F	F	F	F	F	F	F	F	F	F	F	F	F	F	F	F	F	F
AT1G04930	F	F	F	F	F	F	F	F	F	F	-	F	F	F	F	F	F	F	F	F	T	-	F	F	F	F	F	F	F	F	F	F	F	F	F	F	F	F	F	F	F	F	F
AT1G04940	F	F	F	F	F	F	F	F	F	F	-	F	F	F	F	F	F	F	F	F	-	-	F	F	F	F	F	F	F	F	F	F	F	F	F	F	F	F	F	F	F	F	F
AT1G04945	F	F	F	F	F	F	F	F	F	F	-	F	F	F	F	F	F	F	F	F	-	-	F	F	F	F	F	F	F	F	F	F	F	F	F	F	F	F	F	F	F	F	F
AT1G04950	F	F	F	F	F	F	F	F	F	F	-	F	F	F	F	F	F	F	F	F	-	-	F	F	F	F	F	F	F	F	F	F	F	F	F	F	F	F	F	F	F	F	F
AT1G04960	F	F	F	F	F	F	F	F	F	F	-	F	F	F	F	F	F	F	F	F	-	-	F	F	F	F	F	F	F	F	F	F	F	F	F	F	F	F	F	F	F	F	F
AT1G04970	F	F	F	F	F	F	F	F	F	F	-	F	F	F	F	F	F	F	F	F	-	-	F	F	F	F	F	F	F	F	F	F	F	F	F	F	F	F	F	F	F	F	F
AT1G04980	F	F	F	F	F	F	F	F	F	F	-	F	F	F	F	F	F	F	F	F	-	-	F	F	F	F	F	F	F	F	F	F	F	F	F	F	F	F	F	F	F	F	F
AT1G04985	F	F	F	F	F	F	F	F	F	F	-	F	F	F	F	F	F	F	F	F	-	-	F	F	F	F	F	F	F	F	F	F	F	F	F	F	F	F	F	F	F	F	F
AT1G04990	F	F	F	F	F	F	F	F	F	F	-	F	F	F	F	F	F	F	F	F	-	-	F	F	F	F	F	F	F	F	F	F	F	F	F	F	F	F	F	F	F	F	F
AT1G05000	F	F	F	F	F	F	F	F	F	F	-	F	F	F	F	F	F	F	F	F	-	-	F	F	F	F	F	F	F	F	F	F	F	F	F	F	F	F	F	F	F	F	F
AT1G05010	F	F	F	F	F	F	F	F	F	F	-	F	F	F	F	F	F	F	F	F	-	-	F	F	F	F	F	F	F	F	F	F	F	F	F	F	F	F	F	F	F	F	F
AT1G05020	F	F	F	F	F	F	F	F	F	F	-	F	F	F	F	F	F	F	F	F	-	-	F	F	F	F	F	F	F	F	F	F	F	F	F	F	F	F	F	F	F	F	F
AT1G05030	F	F	F	F	F	F	F	F	F	F	-	F	F	F	F	F	F	F	F	F	-	-	F	F	F	F	F	F	F	F	F	F	F	F	F	F	F	F	F	F	F	F	F
AT1G05040	F	F	F	F	F	F	F	F	F	F	-	F	F	F	F	F	F	F	F	F	-	-	F	F	F	F	F	F	F	F	F	F	F	F	F	F	F	F	F	F	F	F	F
AT1G05055	F	F	F	F	F	F	F	F	F	F	-	F	F	F	F	F	F	F	F	F	-	-	F	F	F	F	F	F	F	F	F	F	F	F	F	F	F	F	F	F	F	F	F
AT1G05065	F	F	F	F	F	F	F	F	F	F	-	F	F	F	F	F	F	F	F	F	-	-	F	F	F	F	F	F	F	F	F	F	F	F	F	F	F	F	F	F	F	F	F
AT1G05070	F	F	F	F	F	F	F	F	F	F	-	F	F	F	F	F	F	F	F	F	-	-	F	F	F	F	F	F	F	F	F	F	F	F	F	F	F	F	F	F	F	F	F
AT1G05080	F	F	F	F	F	F	F	F	F	F	-	F	F	F	F	F	F	F	F	F	-	-	F	F	F	F	F	F	F	F	F	F	F	F	F	F	F	F	F	F	F	F	F
AT1G05085	F	F	F	F	F	F	F	F	F	F	-	F	F	F	F	F	F	F	F	F	-	-	F	F	F	F	F	F	F	F	F	F	F	F	F	F	F	F	F	F	F	F	F
AT1G05090	F	F	F	F	F	F	F	F	F	F	-	F	F	F	F	F	F	F	F	F	-	-	F	F	F	F	F	F	F	F	F	F	F	F	F	F	F	F	F	F	F	F	F
AT1G05100	F	F	F	F	F	F	F	F	F	F	-	F	F	F	F	F	F	F	F	F	-	-	F	F	F	F	F	F	F	F	F	F	F	F	F	F	F	F	F	F	F	F	F
AT1G05120	F	F	F	F	F	F	F	F	F	F	-	F	F	F	F	F	F	F	F	F	-	-	F	F	F	F	F	F	F	F	F	F	F	F	F	F	F	F	F	F	F	F	F
AT1G05135	F	F	F	F	F	F	F	F	F	F	-	F	F	F	F	F	F	F	F	F	-	-	F	F	F	F	F	F	F	F	F	F	F	F	F	F	F	F	F	F	F	F	F
AT1G05136	F	F	F	F	F	F	F	F	F	F	-	F	F	F	F	F	F	F	F	F	-	-	F	F	F	F	F	F	F	F	F	F	F	F	F	F	F	F	F	F	F	F	F
AT1G05140	F	F	F	F	F	F	F	F	F	F	-	F	F	F	F	F	F	F	F	F	-	-	F	F	F	F	F	F	F	F	F	F	F	F	F	F	F	F	F	F	F	F	F
AT1G05150	F	F	F	F	F	F	F	F	F	F	-	F	F	F	F	F	F	F	F	F	-	-	F	F	F	F	F	F	F	F	F	F	F	F	F	F	F	F	F	F	F	F	F
AT1G05160	F	F	F	F	F	F	F	F	F	F	-	F	F	F	F	F	F	F	F	F	-	-	F	F	F	F	F	F	F	F	F	F	F	F	F	F	F	F	F	F	F	F	F
AT1G05170	F	F	F	F	F	F	F	F	F	F	-	F	F	F	F	F	F	F	F	F	-	-	F	F	F	F	F	F	F	F	F	F	F	F	F	F	F	F	F	F	F	F	F
AT1G05180	F	F	F	F	F	F	F	F	F	F	-	F	F	F	F	F	F	F	F	F	-	-	F	F	F	F	F	F	F	F	F	F	F	F	F	F	F	F	F	F	F	F	F
AT1G05190	F	F	F	F	F	F	F	F	F	F	-	F	F	F	F	F	F	F	F	F	-	-	F	F	F	F	F	F	F	F	F	F	F	F	F	F	F	F	F	F	F	F	F
AT1G05200	F	F	F	F	F	F	F	F	F	F	-	F	F	F	F	F	F	F	F	F	-	-	F	F	F	F	F	F	F	F	F	F	F	F	F	F	F	F	F	F	F	F	F
AT1G05205	F	F	F	F	F	F	F	F	F	F	-	F	F	F	F	F	F	F	F	F	-	-	F	F	F	F	F	F	F	F	F	F	F	F	F	F	F	F	F	F	F	F	F
AT1G05210	F	F	F	F	F	F	F	F	F	F	-	F	F	F	F	F	F	F	F	F	-	-	F	F	F	F	F	F	F	F	F	F	F	F	F	F	F	F	F	F	F	F	F
AT1G05220	F	F	F	F	F	F	F	F	F	F	-	F	F	F	F	F	F	F	F	F	-	-	F	F	F	F	F	F	F	F	F	F	F	F	F	F	F	F	F	F	F	F	F
AT1G05230	F	F	F	F	F	F	F	F	F	F	-	F	F	F	F	F	F	F	F	F	-	-	F	F	F	F	F	F	F	F	F	F	F	F	F	F	F	F	F	F	F	F	F
AT1G05240	F	F	F	F	F	F	F	F	F	F	-	F	F	F	F	F	F	F	F	F	-	-	F	F	F	F	F	F	F	F	F	F	F	F	F	F	F	F	F	F	F	F	F
AT1G05250	F	F	F	F	F	F	F	F	F	F	-	F	F	F	F	F	F	F	F	F	-	-	F	F	F	F	F	F	F	F	F	F	F	F	F	F	F	F	F	F	F	F	F
AT1G05260	F	F	F	F	F	F	F	F	F	F	-	F	F	F	F	F	F	F	F	F	-	-	F	F	F	F	F	F	F	F	F	F	F	F	F	F	F	F	F	F	F	F	F
AT1G05270	F	F	F	F	F	F	F	F	F	F	-	F	F	F	F	F	F	F	F	F	-	-	F	F	F	F	F	F	F	F	F	F	F	F	F	F	F	F	F	F	F	F	F
AT1G05280	F	F	F	F	F	F	F	F	F	F	-	F	F	F	F	F	F	F	F	F	-	-	F	F	F	F	F	F	F	F	F	F	F	F	F	F	F	F	F	F	F	F	F
AT1G05290	F	F	F	F	F	F	F	F	F	F	-	F	F	F	F	F	F	F	F	F	-	-	F	F	F	F	F	F	F	F	F	F	F	F	F	F	F	F	F	F	F	F	F
AT1G05291	F	F	F	F	F	F	F	F	F	F	-	F	F	F	F	F	F	F	F	F	-	-	F	F	F	F	F	F	F	F	F	F	F	F	F	F	F	F	F	F	F	F	F
AT1G05300	F	F	F	F	F	F	F	F	F	F	-	F	F	F	F	F	F	F	F	F	-	-	F	F	F	F	F	F	F	F	F	F	F	F	F	F	F	F	F	F	F	F	F
AT1G05310	F	F	F	F	F	F	F	F	F	F	-	F	F	F	F	F	F	F	F	F	-	-	F	F	F	F	F	F	F	F	F	F	F	F	F	F	F	F	F	F	F	F	F
AT1G05320	F	F	F	F	F	F	F	F	F	F	-	F	F	F	F	F	F	F	F	F	-	-	F	F	F	F	F	F	F	F	F	F	F	F	F	F	F	F	F	F	F	F	F
AT1G05330	F	F	F	F	F	F	F	F	F	F	-	F	F	F	F	F	F	F	F	F	-	-	F	F	F	F	F	F	F	F	F	F	F	F	F	F	F	F	F	F	F	F	F
AT1G05340	F	F	F	F	F	F	F	F	F	F	-	F	F	F	F	F	F	F	F	F	-	-	F	F	F	F	F	F	F	F	F	F	F	F	F	F	F	F	F	F	F	F	F
AT1G05350	F	F	F	F	F	F	F	F	F	F	-	F	F	F	F	F	F	F	F	F	-	-	F	F	F	F	F	F	F	F	F	F	F	F	F	F	F	F	F	F	F	F	F
AT1G05360	F	F	F	F	F	F	F	F	F	F	-	F	F	F	F	F	F	F	F	F	-	-	F	F	F	F	F	F	F	F	F	F	F	F	F	F	F	F	F	F	F	F	F
AT1G05370	F	F	F	F	F	F	F	F	F	F	-	F	F	F	F	F	F	F	F	F	-	-	F	F	F	F	F	F	F	F	F	F	F	F	F	F	F	F	F	F	F	F	F
AT1G05380	F	F	F	F	F	F	F	F	F	F	-	F	F	F	F	F	F	F	F	F	-	-	F	F	F	F	F	F	F	F	F	F	F	F	F	F	F	F	F	F	F	F	F
AT1G05385	F	F	F	F	F	F	F	F	F	F	-	F	F	F	F	F	F	F	F	F	-	-	F	F	F	F	F	F	F	F	F	F	F	F	F	F	F	F	F	F	F	F	F
AT1G05390	F	F	F	F	F	F	F	F	F	F	-	F	F	F	F	F	F	F	F	F	-	-	F	F	F	F	F	F	F	F	F	F	F	F	F	F	F	F	F	F	F	F	F
AT1G05400	F	F	F	F	F	F	F	F	F	F	-	F	F	F	F	F	F	F	F	F	-	-	F	F	F	F	F	F	F	F	F	F	F	F	F	F	F	F	F	F	F	F	F
AT1G05410	F	F	F	F	F	F	F	F	F	F	-	F	F	F	F	F	F	F	F	F	-	-	F	F	F	F	F	F	F	F	F	F	F	F	F	F	F	F	F	F	F	F	F
AT1G05420	F	F	F	F	F	F	F	F	F	F	-	F	F	F	F	F	F	F	F	F	-	-	F	F	F	F	F	F	F	F	F	F	F	F	F	F	F	F	F	F	F	F	F
AT1G05430	F	F	F	F	F	F	F	F	F	F	-	F	F	F	F	F	F	F	F	F	-	-	F	F	F	F	F	F	F	F	F	F	F	F	F	F	F	F	F	F	F	F	F
AT1G05440	F	F	F	F	F	F	F	F	F	F	-	F	F	F	F	F	F	F	F	F	-	-	F	F	F	F	F	F	F	F	F	F	F	F	F	F	F	F	F	F	F	F	F
AT1G05450	F	F	F	F	F	F	F	F	F	F	-	F	F	F	F	F	F	F	F	F	-	-	F	F	F	F	F	F	F	F	F	F	F	F	F	F	F	F	F	F	F	F	F
AT1G05460	F	F	F	F	F	F	F	F	F	F	-	F	F	F	F	F	F	F	F	F	-	-	F	F	F	F	F	F	F	F	F	F	F	F	F	F	F	F	F	F	F	F	F
AT1G05470	F	F	F	F	F	F	F	F	F	F	-	F	F	F	F	F	F	F	F	F	-	-	F	F	F	F	F	F	F	F	F	F	F	F	F	F	F	F	F	F	F	F	F
AT1G05490	F	F	F	F	F	F	F	F	F	F	-	F	F	F	F	F	F	F	F	F	-	-	F	F	F	F	F	F	F	F	F	F	F	F	F	F	F	F	F	F	F	F	F
AT1G05500	F	F	F	F	F	F	F	F	F	F	-	F	F	F	F	F	F	F	F	F	-	-	F	F	F	F	F	F	F	F	F	F	F	F	F	F	F	F	F	F	F	F	F
AT1G05510	F	F	F	F	F	F	F	F	F	F	-	F	F	F	F	F	F	F	F	F	-	-	F	F	F	F	F	F	F	F	F	F	F	F	F	F	F	F	F	F	F	F	F
AT1G05520	F	F	F	F	F	F	F	F	F	F	-	F	F	F	F	F	F	F	F	F	-	-	F	F	F	F	F	F	F	F	F	F	F	F	F	F	F	F	F	F	F	F	F
AT1G05530	F	F	F	F	F	F	F	F	F	F	-	F	F	F	F	F	F	F	F	F	-	-	F	F	F	F	F	F	F	F	F	F	F	F	F	F	F	F	F	F	F	F	F
AT1G05540	F	F	F	F	F	F	F	F	F	F	-	F	F	F	F	F	F	F	F	F	-	-	F	F	F	F	F	F	F	F	F	F	F	F	F	F	F	F	F	F	F	F	F
AT1G05550	F	F	F	F	F	F	F	F	F	F	-	F	F	F	F	F	F	F	F	F	-	-	F	F	F	F	F	F	F	F	F	F	F	F	F	F	F	F	F	F	F	F	F
AT1G05560	F	F	F	F	F	F	F	F	F	F	-	F	F	F	F	F	F	F	F	F	-	-	F	F	F	F	F	F	F	F	F	F	F	F	F	F	F	F	F	F	F	F	F
AT1G05570	F	F	F	F	F	F	F	F	F	F	-	F	F	F	F	F	F	F	F	F	-	-	F	F	F	F	F	F	F	F	F	F	F	F	F	F	F	F	F	F	F	F	F
AT1G05575	F	F	F	F	F	F	F	F	F	F	-	F	F	F	F	F	F	F	F	F	-	-	F	F	F	F	F	F	F	F	F	F	F	F	F	F	F	F	F	F	F	F	F
AT1G05577	F	F	F	F	F	F	F	F	F	F	-	F	F	F	F	F	F	F	F	F	-	-	F	F	F	F	F	F	F	F	F	F	F	F	F	F	F	F	F	F	F	F	F
AT1G05580	F	F	F	F	F	F	F	F	F	F	-	F	F	F	F	F	F	F	F	F	-	-	F	F	F	F	F	F	F	F	F	F	F	F	F	F	F	F	F	F	F	F	F
AT1G05590	F	F	F	F	F	F	F	F	F	F	-	F	F	F	F	F	F	F	F	F	-	-	F	F	F	F	F	F	F	F	F	F	F	F	F	F	F	F	F	F	F	F	F
AT1G05600	F	F	F	F	F	F	F	F	F	F	-	F	F	F	F	F	F	F	F	F	-	-	F	F	F	F	F	F	F	F	F	F	F	F	F	F	F	F	F	F	F	F	F
AT1G05610	F	F	F	F	F	F	F	F	F	F	-	F	F	F	F	F	F	F	F	F	-	-	F	F	F	F	F	F	F	F	F	F	F	F	F	F	F	F	F	F	F	F	F
AT1G05615	F	F	F	F	F	F	F	F	F	F	-	F	F	F	F	F	F	F	F	F	-	-	F	F	F	F	F	F	F	F	F	F	F	F	F	F	F	F	F	F	F	F	F
AT1G05620	F	F	F	F	F	F	F	F	F	F	-	F	F	F	F	F	F	F	F	F	-	-	F	F	F	F	F	F	F	F	F	F	F	F	F	F	F	F	F	F	F	F	F
AT1G05630	F	F	F	F	F	F	F	F	F	F	-	F	F	F	F	F	F	F	F	F	-	-	F	F	F	F	F	F	F	F	F	F	F	F	F	F	F	F	F	F	F	F	F
AT1G05640	F	F	F	F	F	F	F	F	F	F	-	F	F	F	F	F	F	F	F	F	-	-	F	F	F	F	F	F	F	F	F	F	F	F	F	F	F	F	F	F	F	F	F
AT1G05650	F	F	F	F	F	F	F	F	F	F	-	F	F	F	F	F	F	F	F	F	-	-	F	F	F	F	F	F	F	F	F	F	F	F	F	F	F	F	F	F	F	F	F
AT1G05660	F	F	F	F	F	F	F	F	F	F	-	F	F	F	F	F	F	F	F	F	-	-	F	F	F	F	F	F	F	F	F	F	F	F	F	F	F	F	F	F	F	F	F
AT1G05670	F	F	F	F	F	F	F	F	F	F	-	F	F	F	F	F	F	F	F	F	-	-	F	F	F	F	F	F	F	F	F	F	F	F	F	F	F	F	F	F	F	F	F
AT1G05680	F	F	F	F	F	F	F	F	F	F	-	F	F	F	F	F	F	F	F	F	-	-	F	F	F	F	F	F	F	F	F	F	F	F	F	F	F	F	F	F	F	F	F
AT1G05690	F	F	F	F	F	F	F	F	F	F	-	F	F	F	F	F	F	F	F	F	-	-	F	F	F	F	F	F	F	F	F	F	F	F	F	F	F	F	F	F	F	F	F
AT1G05700	F	F	F	F	F	F	F	F	F	F	-	F	F	F	F	F	F	F	F	F	-	-	F	F	F	F	F	F	F	F	F	F	F	F	F	F	F	F	F	F	F	F	F
AT1G05710	F	F	F	F	F	F	F	F	F	F	-	F	F	F	F	F	F	F	F	F	-	-	F	F	F	F	F	F	F	F	F	F	F	F	F	F	F	F	F	F	F	F	F
AT1G05720	F	F	F	F	F	F	F	F	F	F	-	F	F	F	F	F	F	F	F	F	-	-	F	F	F	F	F	F	F	F	F	F	F	F	F	F	F	F	F	F	F	F	F
AT1G05730	F	F	F	F	F	F	F	F	F	F	-	F	F	F	F	F	F	F	F	F	-	-	F	F	F	F	F	F	F	F	F	F	F	F	F	F	F	F	F	F	F	F	F
AT1G05740	F	F	F	F	F	F	F	F	F	F	-	F	F	F	F	F	F	F	F	F	-	-	F	F	F	F	F	F	F	F	F	F	F	F	F	F	F	F	F	F	F	F	F
AT1G05750	F	F	F	F	F	F	F	F	F	F	-	F	F	F	F	F	F	F	F	F	-	-	F	F	F	F	F	F	F	F	F	F	F	F	F	F	F	F	F	F	F	F	F
AT1G05760	F	F	F	F	F	F	F	F	F	F	-	F	F	F	F	F	F	F	F	F	-	-	F	F	F	F	F	F	F	F	F	F	F	F	F	F	F	F	F	F	F	F	F
AT1G05770	F	F	F	F	F	F	F	F	F	F	-	F	F	F	F	F	F	F	F	F	-	-	F	F	F	F	F	F	F	F	F	F	F	F	F	F	F	F	F	F	F	F	F
AT1G05780	F	F	F	F	F	F	F	F	F	F	-	F	F	F	F	F	F	F	F	F	-	-	F	F	F	F	F	F	F	F	F	F	F	F	F	F	F	F	F	F	F	F	F
AT1G05785	F	F	F	F	F	F	F	F	F	F	-	F	F	F	F	F	F	F	F	F	-	-	F	F	F	F	F	F	F	F	F	F	F	F	F	F	F	F	F	F	F	F	F
AT1G05790	F	F	F	F	F	F	F	F	F	F	-	F	F	F	F	F	F	F	F	F	-	-	F	F	F	F	F	F	F	F	F	F	F	F	F	F	F	F	F	F	F	F	F
AT1G05800	F	F	F	F	F	F	F	F	F	F	-	F	F	F	F	F	F	F	F	F	-	-	F	F	F	F	F	F	F	F	F	F	F	F	F	F	F	F	F	F	F	F	F
AT1G05805	F	F	F	F	F	F	F	F	F	F	-	F	F	F	F	F	F	F	F	F	-	-	F	F	F	F	F	F	F	F	F	F	F	F	F	F	F	F	F	F	F	F	F
AT1G05810	F	F	F	F	F	F	F	F	F	F	-	F	F	F	F	F	F	F	F	F	-	-	F	F	F	F	F	F	F	F	F	F	F	F	F	F	F	F	F	F	F	F	F
AT1G05820	F	F	F	F	F	F	F	F	F	F	-	F	F	F	F	F	F	F	F	F	-	-	F	F	F	F	F	F	F	F	F	F	F	F	F	F	F	F	F	F	F	F	F
AT1G05830	F	F	F	F	F	F	F	F	F	F	-	F	F	F	F	F	F	F	F	F	-	-	F	F	F	F	F	F	F	F	F	F	F	F	F	F	F	F	F	F	F	F	F
AT1G05835	F	F	F	F	F	F	F	F	F	F	-	F	F	F	F	F	F	F	F	F	-	-	F	F	F	F	F	F	F	F	F	F	F	F	F	F	F	F	F	F	F	F	F
AT1G05840	F	F	F	F	F	F	F	F	F	F	-	F	F	F	F	F	F	F	F	F	-	-	F	F	F	F	F	F	F	F	F	F	F	F	F	F	F	F	F	F	F	F	F
AT1G05850	F	F	F	F	F	F	F	F	F	F	-	F	F	F	F	F	F	F	F	F	-	-	F	F	F	F	F	F	F	F	F	F	F	F	F	F	F	F	F	F	F	F	F
AT1G05860	F	F	F	F	F	F	F	F	F	F	-	F	F	F	F	F	F	F	F	F	-	-	F	F	F	F	F	F	F	F	F	F	F	F	F	F	F	F	F	F	F	F	F
AT1G05870	F	F	F	F	F	F	F	F	F	F	-	F	F	F	F	F	F	F	F	F	-	-	F	F	F	F	F	F	F	F	F	F	F	F	F	F	F	F	F	F	F	F	F
AT1G05880	F	F	F	F	F	F	F	F	F	F	-	F	F	F	F	F	F	F	F	F	-	-	F	F	F	F	F	F	F	F	F	F	F	F	F	F	F	F	F	F	F	F	F
AT1G05890	F	F	F	F	F	F	F	F	F	F	-	F	F	F	F	F	F	F	F	F	-	-	F	F	F	F	F	F	F	F	F	F	F	F	F	F	F	F	F	F	F	F	F
AT1G05894	F	F	F	F	F	F	F	F	F	F	-	F	F	F	F	F	F	F	F	F	-	-	F	F	F	F	F	F	F	F	F	F	F	F	F	F	F	F	F	F	F	F	F
AT1G05910	F	F	F	F	F	F	F	F	F	F	-	F	F	F	F	F	F	F	F	F	-	-	F	F	F	F	F	F	F	F	F	F	F	F	F	F	F	F	F	F	F	F	F
AT1G05920	F	F	F	F	F	F	F	F	F	F	-	F	F	F	F	F	F	F	F	F	-	-	F	F	F	F	F	F	F	F	F	F	F	F	F	F	F	F	F	F	F	F	F
AT1G05930	F	F	F	F	F	F	F	F	F	F	-	F	F	F	F	F	F	F	F	F	-	-	F	F	F	F	F	F	F	F	F	F	F	F	F	F	F	F	F	F	F	F	F
AT1G05940	F	F	F	F	F	F	F	F	F	F	-	F	F	F	F	F	F	F	F	F	-	-	F	F	F	F	F	F	F	F	F	F	F	F	F	F	F	F	F	F	F	F	F
AT1G05950	F	F	F	F	F	F	F	F	F	F	-	F	F	F	F	F	F	F	F	F	-	-	F	F	F	F	F	F	F	F	F	F	F	F	F	F	F	F	F	F	F	F	F
AT1G05960	F	F	F	F	F	F	F	F	F	F	-	F	F	F	F	F	F	F	F	F	-	-	F	F	F	F	F	F	F	F	F	F	F	F	F	F	F	F	F	F	F	F	F
AT1G05970	F	F	F	F	F	F	F	F	F	F	-	F	F	F	F	F	F	F	F	F	-	-	F	F	F	F	F	F	F	F	F	F	F	F	F	F	F	F	F	F	F	F	F
AT1G05980	F	F	F	F	F	F	F	F	F	F	-	F	F	F	F	F	F	F	F	F	-	-	F	F	F	F	F	F	F	F	F	F	F	F	F	F	F	F	F	F	F	F	F
AT1G05990	F	F	F	F	F	F	F	F	F	F	-	F	F	F	F	F	F	F	F	F	-	-	F	F	F	F	F	F	F	F	F	F	F	F	F	F	F	F	F	F	F	F	F
AT1G06000	F	F	F	F	F	F	F	F	F	F	-	F	F	F	F	F	F	F	F	F	-	-	F	F	F	F	F	F	F	F	F	F	F	F	F	F	F	F	F	F	F	F	F
AT1G06010	F	F	F	F	F	F	F	F	F	F	-	F	F	F	F	F	F	F	F	F	-	-	F	F	F	F	F	F	F	F	F	F	F	F	F	F	F	F	F	F	F	F	F
AT1G06020	F	F	F	F	F	F	F	F	F	F	-	F	F	F	F	F	F	F	F	F	-	-	F	F	F	F	F	F	F	F	F	F	F	F	F	F	F	F	F	F	F	F	F
AT1G06030	F	F	F	F	F	F	F	F	F	F	-	F	F	F	F	F	F	F	F	F	-	-	F	F	F	F	F	F	F	F	F	F	F	F	F	F	F	F	F	F	F	F	F
AT1G06040	F	F	F	F	F	F	F	F	F	F	-	F	F	F	F	F	F	F	F	F	-	-	F	F	F	F	F	F	F	F	F	F	F	F	F	F	F	F	F	F	F	F	F
AT1G06050	F	F	F	F	F	F	F	F	F	F	-	F	F	F	F	F	F	F	F	F	-	-	F	F	F	F	F	F	F	F	F	F	F	F	F	F	F	F	F	F	F	F	F
AT1G06060	F	F	F	F	F	F	F	F	F	F	-	F	F	F	F	F	F	F	F	F	-	-	F	F	F	F	F	F	F	F	F	F	F	F	F	F	F	F	F	F	F	F	F
AT1G06070	F	F	F	F	F	F	F	F	F	F	-	F	F	F	F	F	F	F	F	F	-	-	F	F	F	F	F	F	F	F	F	F	F	F	F	F	F	F	F	F	F	F	F
AT1G06080	F	F	F	F	F	F	F	F	F	F	-	F	F	F	F	F	F	F	F	F	-	-	F	F	F	F	F	F	F	F	F	F	F	F	F	F	F	F	F	F	F	F	F
AT1G06090	F	F	F	F	F	F	F	F	F	F	-	F	F	F	F	F	F	F	F	F	-	-	F	F	F	F	F	F	F	F	F	F	F	F	F	F	F	F	F	F	F	F	F
AT1G06100	F	F	F	F	F	F	F	F	F	F	-	F	F	F	F	F	F	F	F	F	-	-	F	F	F	F	F	F	F	F	F	F	F	F	F	F	F	F	F	F	F	F	F
AT1G06110	F	F	F	F	F	F	F	F	F	F	-	F	F	F	F	F	F	F	F	F	-	-	F	F	F	F	F	F	F	F	F	F	F	F	F	F	F	F	F	F	F	F	F
AT1G06120	F	F	F	F	F	F	F	F	F	F	-	F	F	F	F	F	F	F	F	F	-	-	F	F	F	F	F	F	F	F	F	F	F	F	F	F	F	F	F	F	F	F	F
AT1G06130	F	F	F	F	F	F	F	F	F	F	-	F	F	F	F	F	F	F	F	F	-	-	F	F	F	F	F	F	F	F	F	F	F	F	F	F	F	F	F	F	F	F	F
AT1G06137	F	F	F	F	F	F	F	F	F	F	-	F	F	F	F	F	F	F	F	F	-	-	F	F	F	F	F	F	F	F	F	F	F	F	F	F	F	F	F	F	F	F	F
AT1G06140	F	F	F	F	F	F	F	F	F	F	-	F	F	F	F	F	F	F	F	F	-	-	F	F	F	F	F	F	F	F	F	F	F	F	F	F	F	F	F	F	F	F	F
AT1G06145	F	F	F	F	F	F	F	F	F	F	-	F	F	F	F	F	F	F	F	F	-	-	F	F	F	F	F	F	F	F	F	F	F	F	F	F	F	F	F	F	F	F	F
AT1G06148	F	F	F	F	F	F	F	F	F	F	-	F	F	F	F	F	F	F	F	F	-	-	F	F	F	F	F	F	F	F	F	F	F	F	F	F	F	F	F	F	F	F	F
AT1G06149	F	F	F	F	F	F	F	F	F	F	-	F	F	F	F	F	F	F	F	F	-	-	F	F	F	F	F	F	F	F	F	F	F	F	F	F	F	F	F	F	F	F	F
AT1G06150	F	F	F	F	F	F	F	F	F	F	-	F	F	F	F	F	F	F	F	F	-	-	F	F	F	F	F	F	F	F	F	F	F	F	F	F	F	F	F	F	F	F	F
AT1G06160	F	F	F	F	F	F	F	F	F	F	-	F	F	F	F	F	F	F	F	F	-	-	F	F	F	F	F	F	F	F	F	F	F	F	F	F	F	F	F	F	F	F	F
AT1G06170	F	F	F	F	F	F	F	F	F	F	-	F	F	F	F	F	F	F	F	F	-	-	F	F	F	F	F	F	F	F	F	F	F	F	F	F	F	F	F	F	F	F	F
AT1G06180	F	F	F	F	F	F	F	F	F	F	-	F	F	F	F	F	F	F	F	F	-	-	F	F	F	F	F	F	F	F	F	F	F	F	F	F	F	F	F	F	F	F	F
AT1G06190	F	F	F	F	F	F	F	F	T	F	-	F	F	F	F	F	F	F	F	F	-	-	F	F	F	F	F	F	F	F	F	F	F	F	F	F	F	F	F	F	F	F	F
AT1G06200	F	F	F	F	F	F	F	F	T	F	-	F	F	F	F	F	F	F	F	F	-	-	F	F	F	F	F	F	F	F	F	F	F	F	F	F	F	F	F	F	F	F	F
AT1G06210	F	F	F	F	F	F	F	F	T	F	-	F	F	F	F	F	F	F	F	F	-	-	F	F	F	F	F	F	F	F	F	F	F	F	F	F	F	F	F	F	F	F	F
AT1G06220	F	F	F	F	F	F	F	F	F	F	-	F	F	F	F	F	F	F	F	F	-	-	F	F	F	F	F	F	F	F	F	F	F	F	F	F	F	F	F	F	F	F	F
AT1G06225	F	F	F	F	F	F	F	F	F	F	-	F	F	F	F	F	F	F	F	F	-	-	F	F	F	F	F	F	F	F	F	F	F	F	F	F	F	F	F	F	F	F	F
AT1G06230	F	F	F	F	F	F	F	F	F	F	-	F	F	F	F	F	F	F	F	F	-	-	F	F	F	F	F	F	F	F	F	F	F	F	F	F	F	F	F	F	F	F	F
AT1G06240	F	F	F	F	F	F	F	F	F	F	-	F	F	F	F	F	F	F	F	F	-	-	F	F	F	F	F	F	F	F	F	F	F	F	F	F	F	F	F	F	F	F	F
AT1G06250	F	F	F	F	F	F	F	F	F	F	-	F	F	F	F	F	F	F	F	F	-	-	F	F	F	F	F	F	F	F	F	F	F	F	F	F	F	F	F	F	F	F	F
AT1G06260	F	F	F	F	F	F	F	F	F	F	-	F	F	F	F	F	F	F	F	F	-	-	F	F	F	F	F	F	F	F	F	F	F	F	F	F	F	F	F	F	F	F	F
AT1G06265	F	F	F	F	F	F	F	F	F	F	-	F	F	F	F	F	F	F	F	F	-	-	F	F	F	F	F	F	F	F	F	F	F	F	F	F	F	F	F	F	F	F	F
AT1G06270	F	F	F	F	F	F	F	F	F	F	-	F	F	F	F	F	F	F	F	F	-	-	F	F	F	F	F	F	F	F	F	F	F	F	F	F	F	F	F	F	F	F	F
AT1G06280	F	F	F	F	F	F	F	F	F	F	-	F	F	F	F	F	F	F	F	F	-	-	F	F	F	F	F	F	F	F	F	F	F	F	F	F	F	F	F	F	F	F	F
AT1G06290	F	F	F	F	F	F	F	F	F	F	-	F	F	F	F	F	F	F	F	F	-	-	F	F	F	F	F	F	F	F	F	F	F	F	F	F	F	F	F	F	F	F	F
AT1G06310	F	F	F	F	F	F	F	F	F	F	-	F	F	F	F	F	F	F	F	F	-	-	F	F	F	F	F	F	F	F	F	F	F	F	F	F	F	F	F	F	F	F	F
AT1G06320	F	F	F	F	F	F	F	F	F	F	-	F	F	F	F	F	F	F	F	F	-	-	F	F	F	F	F	F	F	F	F	F	F	F	F	F	F	F	F	F	F	F	F
AT1G06330	F	F	F	F	F	F	F	F	F	F	-	F	F	F	F	F	F	F	F	F	-	-	F	F	F	F	F	F	F	F	F	F	F	F	F	F	F	F	F	F	F	F	F
AT1G06340	F	F	F	F	F	F	F	F	F	F	-	F	F	F	F	F	F	F	F	F	-	-	F	F	F	F	F	F	F	F	F	F	F	F	F	F	F	F	F	F	F	F	F
AT1G06350	F	F	F	F	F	F	F	F	F	F	-	F	F	F	F	F	F	F	F	F	-	-	F	F	F	F	F	F	F	F	F	F	F	F	F	F	F	F	F	F	F	F	F
AT1G06360	F	F	F	F	F	F	F	F	F	F	-	F	F	F	F	F	F	F	F	F	-	-	F	F	F	F	F	F	F	F	F	F	F	F	F	F	F	F	F	F	F	F	F
AT1G06370	F	F	F	F	F	F	F	F	F	F	-	F	F	F	F	F	F	F	F	F	-	-	F	F	F	F	F	F	F	F	F	F	F	F	F	F	F	F	F	F	F	F	F
AT1G06380	F	F	F	F	F	F	F	F	F	F	-	F	F	F	F	F	F	F	F	F	-	-	F	F	F	F	F	F	F	F	F	F	F	F	F	F	F	F	F	F	F	F	F
AT1G06390	F	F	F	F	F	F	F	F	F	F	-	F	F	F	F	F	F	F	F	F	-	-	F	F	F	F	F	F	F	F	F	F	F	F	F	F	F	F	F	F	F	F	F
AT1G06400	F	F	F	F	F	F	F	F	F	F	-	F	F	F	F	F	F	F	F	F	-	-	F	F	F	F	F	F	F	F	F	F	F	F	F	F	F	F	F	F	F	F	F
AT1G06410	F	F	F	F	F	F	F	F	F	F	-	F	F	F	F	F	F	F	F	F	-	-	F	F	F	F	F	F	F	F	F	F	F	F	F	F	F	F	F	F	F	F	F
AT1G06420	F	F	F	F	F	F	F	F	F	F	-	F	F	F	F	F	F	F	F	F	-	-	F	F	F	F	F	F	F	F	F	F	F	F	F	F	F	F	F	F	F	F	F
AT1G06430	F	F	F	F	F	F	F	F	F	F	-	F	F	F	F	F	F	F	F	F	-	-	F	F	F	F	F	F	F	F	F	F	F	F	F	F	F	F	F	F	F	F	F
AT1G06440	F	F	F	F	F	F	F	F	F	F	-	F	F	F	F	F	F	F	F	F	-	-	F	F	F	F	F	F	F	F	F	F	F	F	F	F	F	F	F	F	F	F	F
AT1G06450	F	F	F	F	F	F	F	F	F	F	-	F	F	F	F	F	F	F	F	F	-	-	F	F	F	F	F	F	F	F	F	F	F	F	F	F	F	F	F	F	F	F	F
AT1G06460	F	F	F	F	F	F	F	F	F	F	-	F	F	F	F	F	F	F	F	F	-	-	F	F	F	F	F	F	F	F	F	F	F	F	F	F	F	F	F	F	F	F	F
AT1G06470	F	F	F	F	F	F	F	F	F	F	-	F	F	F	F	F	F	F	F	F	-	-	F	F	F	F	F	F	F	F	F	F	F	F	F	F	F	F	F	F	F	F	F
AT1G06475	F	F	F	F	F	F	F	F	F	F	-	F	F	F	F	F	F	F	F	F	-	-	F	F	F	F	F	F	F	F	F	F	F	F	F	F	F	F	F	F	F	F	F
AT1G06480	F	F	F	F	F	F	F	F	F	F	-	F	F	F	F	F	F	F	F	F	-	-	F	F	F	F	F	F	F	F	F	F	F	F	F	F	F	F	F	F	F	F	F
AT1G06490	F	F	F	F	F	F	F	F	F	F	-	F	F	F	F	F	F	F	F	F	-	-	F	F	F	F	F	F	F	F	F	F	F	F	F	F	F	F	F	F	F	F	F
AT1G06500	F	F	F	F	F	F	F	F	F	F	-	F	F	F	F	F	F	F	F	F	-	-	F	F	F	F	F	F	F	F	F	F	F	F	F	F	F	F	F	F	F	F	F
AT1G06510	F	F	F	F	F	F	F	F	F	F	-	F	F	F	F	F	F	F	F	F	-	-	F	F	F	F	F	F	F	F	F	F	F	F	F	F	F	F	F	F	F	F	F
AT1G06515	F	F	F	F	F	F	F	F	F	F	-	F	F	F	F	F	F	F	F	F	-	-	F	F	F	F	F	F	F	F	F	F	F	F	F	F	F	F	F	F	F	F	F
AT1G06520	F	F	F	F	F	F	F	F	F	F	-	F	F	F	F	F	F	F	F	F	-	-	F	F	F	F	F	F	F	F	F	F	F	F	F	F	F	F	F	F	F	F	F
AT1G06530	F	F	F	F	F	F	F	F	F	F	-	F	F	F	F	F	F	F	F	F	-	-	F	F	F	F	F	F	F	F	F	F	F	F	F	F	F	F	F	F	F	F	F
AT1G06540	F	F	F	F	F	F	F	F	F	F	-	F	F	F	F	F	F	F	F	F	-	-	F	F	F	F	F	F	F	F	F	F	F	F	F	F	F	F	F	F	F	F	F
AT1G06550	F	F	F	F	F	F	F	F	F	F	-	F	F	F	F	F	F	F	F	F	-	-	F	F	F	F	F	F	F	F	F	F	F	F	F	F	F	F	F	F	F	F	F
AT1G06560	F	F	F	F	F	F	F	F	F	F	-	F	F	F	F	F	F	F	F	F	-	-	F	F	F	F	F	F	F	F	F	F	F	F	F	F	F	F	F	F	F	F	F
AT1G06570	F	F	F	F	F	F	F	F	F	F	-	F	F	F	F	F	F	F	F	F	-	-	F	F	F	F	F	F	F	F	F	F	F	F	F	F	F	F	F	F	F	F	F
AT1G06580	F	F	F	F	F	F	F	F	F	F	-	F	F	F	F	F	F	F	F	F	-	-	F	F	F	F	F	F	F	F	F	F	F	F	F	F	F	F	F	F	F	F	F
AT1G06590	F	F	F	F	F	F	F	F	F	F	-	F	F	F	F	F	F	F	F	F	-	-	F	F	F	F	F	F	F	F	F	F	F	F	F	F	F	F	F	F	F	F	F
AT1G06610	F	F	F	F	F	F	F	F	F	F	-	F	F	F	F	F	F	F	F	F	-	-	F	F	F	F	F	F	F	F	F	F	F	F	F	F	F	F	F	F	F	F	F
AT1G06620	F	F	F	F	F	F	F	F	F	F	-	F	F	F	F	F	F	F	F	F	-	-	F	F	F	F	F	F	F	F	F	F	F	F	F	F	F	F	F	F	F	F	F
AT1G06630	F	F	F	F	F	F	F	F	F	F	-	F	F	F	F	F	F	F	F	F	-	-	F	F	F	F	F	F	F	F	F	F	F	F	F	F	F	F	F	F	F	F	F
AT1G06640	F	F	F	F	F	F	F	F	F	F	-	F	F	F	F	F	F	F	F	F	-	-	F	T	F	F	F	F	F	F	F	F	F	F	F	F	F	F	F	F	F	F	F
AT1G06645	F	F	F	F	F	F	F	F	F	F	-	F	F	F	F	F	F	F	F	F	-	-	F	T	F	F	F	F	F	F	F	F	F	F	F	F	F	F	F	F	F	F	F
AT1G06650	F	F	F	F	F	F	F	F	F	F	-	F	F	F	F	F	F	F	F	F	-	-	F	F	F	F	F	F	F	F	F	F	F	F	F	F	F	F	F	F	F	F	F
AT1G06660	F	F	F	F	F	F	F	F	F	F	-	F	F	F	F	F	F	F	F	F	-	-	F	F	F	F	F	F	F	F	F	F	F	F	F	F	F	F	F	F	F	F	F
AT1G06670	F	F	F	F	F	F	F	F	F	F	-	F	F	F	F	F	F	F	F	F	-	-	F	F	F	F	F	F	F	F	F	F	F	F	F	F	F	F	F	F	F	F	F
AT1G06680	F	F	F	F	F	F	F	F	F	F	-	F	F	F	F	F	F	F	F	F	-	-	F	F	F	F	F	F	F	F	F	F	F	F	F	F	F	F	F	F	F	F	F
AT1G06690	F	F	F	F	F	F	F	F	F	F	-	F	F	F	F	F	F	F	F	F	-	-	F	F	F	F	F	F	F	F	F	F	F	F	F	F	F	F	F	F	F	F	F
AT1G06700	F	F	F	F	F	F	F	F	F	F	-	F	F	F	F	F	F	F	F	F	-	-	F	F	F	F	F	F	F	F	F	F	F	F	F	F	F	F	F	F	F	F	F
AT1G06710	F	F	F	F	F	F	F	F	F	F	-	F	F	F	F	F	F	F	F	F	-	-	F	F	F	F	F	F	F	F	F	F	F	F	F	F	F	F	F	F	F	F	F
AT1G06720	F	F	F	F	F	F	F	F	F	F	-	F	F	F	F	F	F	F	F	F	-	-	F	F	F	F	F	F	F	F	F	F	F	F	F	F	F	F	F	F	F	F	F
AT1G06730	F	F	F	F	F	F	F	F	F	F	-	F	F	F	F	F	F	F	F	F	-	-	F	F	F	F	F	F	F	F	F	F	F	F	F	F	F	F	F	F	F	F	F
AT1G06740	F	F	F	F	F	F	F	F	F	F	-	F	F	F	F	F	F	F	F	F	-	-	F	F	F	F	F	F	F	F	F	F	F	F	F	F	F	F	F	F	F	F	F
AT1G06750	F	F	F	F	F	F	F	F	F	F	-	F	F	F	F	F	F	F	F	F	-	-	F	F	F	F	F	F	F	F	F	F	F	F	F	F	F	F	F	F	F	F	F
AT1G06760	F	F	F	F	F	F	F	F	F	F	-	F	F	F	F	F	F	F	F	F	-	-	F	F	F	F	F	F	F	F	F	F	F	F	F	F	F	F	F	F	F	F	F
AT1G06770	F	F	F	F	F	F	F	F	F	F	-	F	F	F	F	F	F	F	F	F	-	-	F	F	F	F	F	F	F	F	F	F	F	F	F	F	F	F	F	F	F	F	F
AT1G06780	F	F	F	F	F	F	F	F	F	F	-	F	F	F	F	F	F	F	F	F	-	-	F	F	F	F	F	F	F	F	F	F	F	F	F	F	F	F	F	F	F	F	F
AT1G06790	F	F	F	F	F	F	F	F	F	F	-	F	F	F	F	F	F	F	F	F	-	-	F	F	F	F	F	F	F	F	F	F	F	F	F	F	F	F	F	F	F	F	F
AT1G06800	F	F	F	F	F	F	F	F	F	F	-	F	F	F	F	F	F	F	F	F	-	-	F	F	F	F	F	F	F	F	F	F	F	F	F	F	F	F	F	F	F	F	F
AT1G06810	F	F	F	F	F	F	F	F	F	F	-	F	F	F	F	F	F	F	F	F	-	-	F	F	F	F	F	F	F	F	F	F	F	F	F	F	F	F	F	F	F	F	F
AT1G06820	F	F	F	F	F	F	F	F	F	F	-	F	F	F	F	F	F	F	F	F	-	-	F	F	F	F	F	F	F	F	F	F	F	F	F	F	F	F	F	F	F	F	F
AT1G06830	F	F	F	F	F	F	F	F	F	F	-	F	F	F	F	F	F	F	F	F	-	-	F	F	F	F	F	F	F	F	F	F	F	F	F	F	F	F	F	F	F	F	F
AT1G06840	F	F	F	F	F	F	F	F	F	F	-	F	F	F	F	F	F	F	F	F	-	-	F	F	F	F	F	F	F	F	F	F	F	F	F	F	F	F	F	F	F	F	F
AT1G06850	F	F	F	F	F	F	F	F	F	F	-	F	F	F	F	F	F	F	F	F	-	-	F	F	F	F	F	F	F	F	F	F	F	F	F	F	F	F	F	F	F	F	F
AT1G06860	F	F	F	F	F	F	F	F	F	F	-	F	F	F	F	F	F	F	F	F	-	-	F	F	F	F	F	F	F	F	F	F	F	F	F	F	F	F	F	F	F	F	F
AT1G06870	F	F	F	F	F	F	F	F	F	F	-	F	F	F	F	F	F	F	F	F	-	-	F	F	F	F	F	F	F	F	F	F	F	F	F	F	F	F	F	F	F	F	F
AT1G06880	F	F	F	F	F	F	F	F	F	F	-	F	F	F	F	F	F	F	F	F	-	-	F	F	F	F	F	F	F	F	F	F	F	F	F	F	F	F	F	F	F	F	F
AT1G06890	F	F	F	F	F	F	F	F	F	F	-	F	F	F	F	F	F	F	F	F	-	-	F	F	F	F	F	F	F	F	F	F	F	F	F	F	F	F	F	F	F	F	F
AT1G06900	F	F	F	F	F	F	F	F	F	F	-	F	F	F	F	F	F	F	F	F	-	-	F	F	F	F	F	F	F	F	F	F	F	F	F	F	F	F	F	F	F	F	F
AT1G06910	F	F	F	F	F	F	F	F	F	F	-	F	F	F	F	F	F	F	F	F	-	-	F	F	F	F	F	F	F	F	F	F	F	F	F	F	F	F	F	F	F	F	F
AT1G06920	F	F	F	F	F	F	F	F	F	F	-	F	F	F	F	F	F	F	F	F	-	-	F	F	F	F	F	F	F	F	F	F	F	F	F	F	F	F	F	F	F	F	F
AT1G06923	F	F	F	F	F	F	F	F	F	F	-	F	F	F	F	F	F	F	F	F	-	-	F	F	F	F	F	F	F	F	F	F	F	F	F	F	F	F	F	F	F	F	F
AT1G06925	F	F	F	F	F	F	F	F	F	F	-	F	F	F	F	F	F	F	F	F	-	-	F	F	F	F	F	F	F	F	F	F	F	F	F	F	F	F	F	F	F	F	F
AT1G06930	F	F	F	F	F	F	F	F	F	F	-	F	F	F	F	F	F	F	F	F	-	-	F	F	F	F	F	F	F	F	F	F	F	F	F	F	F	F	F	F	F	F	F
AT1G06950	F	F	F	F	F	F	F	F	F	F	-	F	F	F	F	F	F	F	F	F	-	-	F	F	F	F	F	F	F	F	F	F	F	F	F	F	F	F	F	F	F	F	F
AT1G06960	F	F	F	F	F	F	F	F	F	F	-	F	F	F	F	F	F	F	F	F	-	-	F	F	F	F	F	F	F	F	F	F	F	F	F	F	F	F	F	F	F	F	F
AT1G06970	F	F	F	F	F	F	F	F	F	F	-	F	F	F	F	F	F	F	F	F	-	-	F	F	F	F	F	F	F	F	F	F	F	F	F	F	F	F	F	F	F	F	F
AT1G06980	F	F	F	F	F	F	F	F	F	F	-	F	F	F	F	F	F	F	F	F	-	-	F	F	F	F	F	F	F	F	F	F	F	F	F	F	F	F	F	F	F	F	F
AT1G06990	F	F	F	F	F	F	F	F	F	F	-	F	F	F	F	F	F	F	F	F	-	-	F	F	F	F	F	F	F	F	F	F	F	F	F	F	F	F	F	F	F	F	F
AT1G07000	F	F	F	F	F	F	F	F	F	F	-	F	F	F	F	F	F	F	F	F	-	-	F	F	F	F	F	F	F	F	F	F	F	F	F	F	F	F	F	F	F	F	F
AT1G07010	F	F	F	F	F	F	F	F	F	F	-	F	F	F	F	F	F	F	F	F	-	-	F	F	F	F	F	F	F	F	F	F	F	F	F	F	F	F	F	F	F	F	F
AT1G07020	F	F	F	F	F	F	F	F	F	F	-	F	F	F	F	F	F	F	F	F	-	-	F	F	F	F	F	F	F	F	F	F	F	F	F	F	F	F	F	F	F	F	F
AT1G07025	F	F	F	F	F	F	F	F	F	F	-	F	F	F	F	F	F	F	F	F	-	-	F	F	F	F	F	F	F	F	F	F	F	F	F	F	F	F	F	F	F	F	F
AT1G07030	F	F	F	F	F	F	F	F	F	F	-	F	F	F	F	F	F	F	F	F	-	-	F	F	F	F	F	F	F	F	F	F	F	F	F	F	F	F	F	F	F	F	F
AT1G07040	F	F	F	F	F	F	F	F	F	F	-	F	F	F	F	F	F	F	F	F	-	-	F	F	F	F	F	F	F	F	F	F	F	F	F	F	F	F	F	F	F	F	F
AT1G07050	F	F	F	F	F	F	F	F	F	F	-	F	F	F	F	F	F	F	F	F	-	-	F	F	F	F	F	F	F	F	F	F	F	F	F	F	F	F	F	F	F	F	F
AT1G07051	F	F	F	F	F	F	F	F	F	F	-	F	F	F	F	F	F	F	F	F	-	-	F	F	F	F	F	F	F	F	F	F	F	F	F	F	F	F	F	F	F	F	F
AT1G07060	F	F	F	F	F	F	F	F	F	F	-	F	F	F	F	F	F	F	F	F	-	-	F	F	F	F	F	F	F	F	F	F	F	F	F	F	F	F	F	F	F	F	F
AT1G07070	F	F	F	F	F	F	F	F	F	F	-	F	F	F	F	F	F	F	F	F	-	-	F	F	F	F	F	F	F	F	F	F	F	F	F	F	F	F	F	F	F	F	F
AT1G07080	F	F	F	F	F	F	F	F	F	F	-	F	F	F	F	F	F	F	F	F	-	-	F	F	F	F	F	F	F	F	F	F	F	F	F	F	F	F	F	F	F	F	F
AT1G07090	F	F	F	F	F	F	F	F	F	F	-	F	F	F	F	F	F	F	F	F	-	-	F	F	F	F	F	F	F	F	F	F	F	F	F	F	F	F	F	F	F	F	F
AT1G07100	F	F	F	F	F	F	F	F	F	F	-	F	F	F	F	F	F	F	F	F	-	-	F	F	F	F	F	F	F	F	F	F	F	F	F	F	F	F	F	F	F	F	F
AT1G07110	F	F	F	F	F	F	F	F	F	F	-	F	F	F	F	F	F	F	F	F	-	-	F	F	F	F	F	F	F	F	F	F	F	F	F	F	F	F	F	F	F	F	F
AT1G07119	F	F	F	F	F	F	F	F	F	F	-	F	F	F	F	F	F	F	F	F	-	-	F	F	F	F	F	F	F	F	F	F	F	F	F	F	F	F	F	F	F	F	F
AT1G07120	F	F	F	F	F	F	F	F	F	F	-	F	F	F	F	F	F	F	F	F	-	-	F	F	F	F	F	F	F	F	F	F	F	F	F	F	F	F	F	F	F	F	F
AT1G07130	F	F	F	F	F	F	F	F	F	F	-	F	F	F	F	F	F	F	F	F	-	-	F	F	F	F	F	F	F	F	F	F	F	F	F	F	F	F	F	F	F	F	F
AT1G07135	F	F	F	F	F	F	F	F	F	F	-	F	F	F	F	F	F	F	F	F	-	-	F	F	F	F	F	F	F	F	F	F	F	F	F	F	F	F	F	F	F	F	F
AT1G07140	F	F	F	F	F	F	F	F	F	F	-	F	F	F	F	F	F	F	F	F	-	-	F	F	F	F	F	F	F	F	F	F	F	F	F	F	F	F	F	F	F	F	F
AT1G07150	F	F	F	F	F	F	F	F	F	F	-	F	F	F	F	F	F	F	F	F	-	-	F	F	F	F	F	F	F	F	F	F	F	F	F	F	F	F	F	F	F	F	F
AT1G07160	F	F	F	F	F	F	F	F	F	F	-	F	F	F	F	F	F	F	F	F	-	-	F	F	F	F	F	F	F	F	F	F	F	F	F	F	F	F	F	F	F	F	F
AT1G07170	F	F	F	F	F	F	F	F	F	F	-	F	F	F	F	F	F	F	F	F	-	-	F	F	F	F	F	F	F	F	F	F	F	F	F	F	F	F	F	F	F	F	F
AT1G07175	F	F	F	F	F	F	F	F	F	F	-	F	F	F	F	F	F	F	F	F	-	-	F	F	F	F	F	F	F	F	F	F	F	F	F	F	F	F	F	F	F	F	F
AT1G07180	F	F	F	F	F	F	F	F	F	F	-	F	F	F	F	F	F	F	F	F	-	-	F	F	F	F	F	F	F	F	F	F	F	F	F	F	F	F	F	F	F	F	F
AT1G07190	F	F	F	F	F	F	F	F	F	F	-	F	F	F	F	F	F	F	F	F	-	-	F	F	F	F	F	F	F	F	F	F	F	F	F	F	F	F	F	F	F	F	F
AT1G07200	F	F	F	F	F	F	F	F	F	F	-	F	F	F	F	F	F	F	F	F	-	-	F	F	F	F	F	F	F	F	F	F	F	F	F	F	F	F	F	F	F	F	F
AT1G07210	F	F	F	F	F	F	F	F	F	F	-	F	F	F	F	F	F	F	F	F	-	-	F	F	F	F	F	F	F	F	F	F	F	F	F	F	F	F	F	F	F	F	F
AT1G07220	F	F	F	F	F	F	F	F	F	F	-	F	F	F	F	F	F	F	F	F	-	-	F	F	F	F	F	F	F	F	F	F	F	F	F	F	F	F	F	F	F	F	F
AT1G07230	F	F	F	F	F	F	F	F	F	F	-	F	F	F	F	F	F	F	F	F	-	-	F	F	F	F	F	F	F	F	F	F	F	F	F	F	F	F	F	F	F	F	F
AT1G07240	F	F	F	F	F	F	F	F	F	F	-	F	F	F	F	F	F	F	F	F	-	-	F	F	F	F	F	F	F	F	F	F	F	F	F	F	F	F	F	F	F	F	F
AT1G07250	F	F	F	F	F	F	F	F	F	F	-	F	F	F	F	F	F	F	F	F	-	-	F	F	F	F	F	F	F	F	F	F	F	F	F	F	F	F	F	F	F	F	F
AT1G07260	F	F	F	F	F	F	F	F	F	F	-	F	F	F	F	F	F	F	F	F	-	-	F	F	F	F	F	F	F	F	F	F	F	F	F	F	F	F	F	F	F	F	F
AT1G07270	F	F	F	F	F	F	F	F	F	F	-	F	F	F	F	F	F	F	F	F	-	-	F	F	F	F	F	F	F	F	F	F	F	F	F	F	F	F	F	F	F	F	F
AT1G07280	F	F	F	F	F	F	F	F	F	F	-	F	F	F	F	F	F	F	F	F	-	-	F	F	F	F	F	F	F	F	F	F	F	F	F	F	F	F	F	F	F	F	F
AT1G07290	F	F	F	F	F	F	F	F	F	F	-	F	F	F	F	F	F	F	F	F	-	-	F	F	F	F	F	F	F	F	F	F	F	F	F	F	F	F	F	F	F	F	F
AT1G07300	F	F	F	F	F	F	F	F	F	F	-	F	F	F	F	F	F	F	F	F	-	-	F	F	F	F	F	F	F	F	F	F	F	F	F	F	F	F	F	F	F	F	F
AT1G07310	F	F	F	F	F	F	F	F	F	F	-	F	F	F	F	F	F	F	F	F	-	-	F	F	F	F	F	F	F	F	F	F	F	F	F	F	F	F	F	F	F	F	F
AT1G07320	F	F	F	F	F	F	F	F	F	F	-	F	F	F	F	F	F	F	F	F	-	-	F	F	F	F	F	F	F	F	F	F	F	F	F	F	F	F	F	F	F	F	F
AT1G07330	F	F	F	F	F	F	F	F	F	F	-	F	F	F	F	F	F	F	F	F	-	-	F	F	F	F	F	F	F	F	F	F	F	F	F	F	F	F	F	F	F	F	F
AT1G07340	F	F	F	F	F	F	F	F	F	F	-	F	F	F	F	F	F	F	F	F	-	-	F	F	F	F	F	F	F	F	F	F	F	F	F	F	F	F	F	F	F	F	F
AT1G07350	F	F	F	F	F	F	F	F	F	F	-	F	F	F	F	F	F	F	F	F	-	-	F	F	F	F	F	F	F	F	F	F	F	F	F	F	F	F	F	F	F	F	F
AT1G07360	F	F	F	F	F	F	F	F	F	F	-	F	F	F	F	F	F	F	F	F	-	-	F	F	F	F	F	F	F	F	F	F	F	F	F	F	F	F	F	F	F	F	F
AT1G07370	F	F	F	F	F	F	F	F	F	F	-	F	F	F	F	F	F	F	F	F	-	-	F	F	F	F	F	F	F	F	F	F	F	F	F	F	F	F	F	F	F	F	F
AT1G07380	F	F	F	F	F	F	F	F	F	F	-	F	F	F	F	F	F	F	F	F	-	-	F	F	F	F	F	F	F	F	F	F	F	F	F	F	F	F	F	F	F	F	F
AT1G07390	F	F	F	F	F	F	F	F	F	F	-	F	F	F	F	F	F	F	F	F	-	-	F	F	F	F	F	F	F	F	F	F	F	F	F	F	F	F	F	F	F	F	F
AT1G07400	F	F	F	F	F	F	F	F	F	F	-	F	F	F	F	F	F	F	F	F	-	-	F	F	F	F	F	F	F	F	F	F	F	F	F	F	F	F	F	F	F	F	F
AT1G07410	F	F	F	F	F	F	F	F	F	F	-	F	F	F	F	F	F	F	F	F	-	-	F	F	F	F	F	F	F	F	F	F	F	F	F	F	F	F	F	F	F	F	F
AT1G07420	F	F	F	F	F	F	F	F	F	F	-	F	F	F	F	F	F	F	F	F	-	-	F	F	F	F	F	F	F	F	F	F	F	F	F	F	F	F	F	F	F	F	F
AT1G07430	F	F	F	F	F	F	F	F	F	F	-	F	F	F	F	F	F	F	F	F	-	-	F	F	F	F	F	F	F	F	F	F	F	F	F	F	F	F	F	F	F	F	F
AT1G07440	F	F	F	F	F	F	F	F	F	F	-	F	F	F	F	F	F	F	F	F	-	-	F	F	F	F	F	F	F	F	F	F	F	F	F	F	F	F	F	F	F	F	F
AT1G07450	F	F	F	F	F	F	F	F	F	F	-	F	F	F	F	F	F	F	F	F	-	-	F	F	F	F	F	F	F	F	F	F	F	F	F	F	F	F	F	F	F	F	F
AT1G07473	F	F	F	F	F	F	F	F	F	F	-	F	F	F	F	F	F	F	F	F	-	-	F	F	F	F	F	F	F	F	F	F	F	F	F	F	F	F	F	F	F	F	F
AT1G07476	F	F	F	F	F	F	F	F	F	F	-	F	F	F	F	F	F	F	F	F	-	-	F	F	F	F	F	F	F	F	F	F	F	F	F	F	F	F	F	F	F	F	F
AT1G07480	F	F	F	F	F	F	F	F	F	F	-	F	F	F	F	F	F	F	F	F	-	-	F	F	F	F	F	F	F	F	F	F	F	F	F	F	F	F	F	F	F	F	F
AT1G07485	F	F	F	F	F	F	F	F	F	F	-	F	F	F	F	F	F	F	F	F	-	-	F	F	F	F	F	F	F	F	F	F	F	F	F	F	F	F	F	F	F	F	F
AT1G07490	F	F	F	F	F	F	F	F	F	F	-	F	F	F	F	F	F	F	F	F	-	-	F	F	F	F	F	F	F	F	F	F	F	F	F	F	F	F	F	F	F	F	F
AT1G07500	F	F	F	F	F	F	F	F	F	F	-	F	F	F	F	F	F	F	F	F	-	-	F	F	F	F	F	F	F	F	F	F	F	F	F	F	F	F	F	F	F	F	F
AT1G07510	F	F	F	F	F	F	F	F	F	F	-	F	F	F	F	F	F	F	F	F	-	-	F	F	F	F	F	F	F	F	F	F	F	F	F	F	F	F	F	F	F	F	F
AT1G07520	F	F	F	F	F	F	F	F	F	F	-	F	F	F	F	F	F	F	F	F	-	-	F	F	F	F	F	F	F	F	F	F	F	F	F	F	F	F	F	F	F	F	F
AT1G07530	F	F	F	F	F	F	F	F	F	F	-	F	F	F	F	F	F	F	F	F	-	-	F	F	F	F	F	F	F	F	F	F	F	F	F	F	F	F	F	F	F	F	F
AT1G07540	F	F	F	F	F	F	F	F	F	F	-	F	F	F	F	F	F	F	F	F	-	-	F	F	F	F	F	F	F	F	F	F	F	F	F	F	F	F	F	F	F	F	F
AT1G07550	F	F	F	F	F	F	F	F	F	F	-	F	F	F	F	F	F	F	F	F	-	-	F	F	F	F	F	F	F	F	F	F	F	F	F	F	F	F	F	F	F	F	F
AT1G07560	F	F	F	F	F	F	F	F	F	F	-	F	F	F	F	F	F	F	F	F	-	-	F	F	F	F	F	F	F	F	F	F	F	F	F	F	F	F	F	F	F	F	F
AT1G07570	F	F	F	F	F	F	F	F	F	F	-	F	F	F	F	F	F	F	F	F	-	-	F	F	F	F	F	F	F	F	F	F	F	F	F	F	F	F	F	F	F	F	F
AT1G07580	F	F	F	F	F	F	F	F	F	F	-	F	F	F	F	F	F	F	F	F	-	-	F	F	F	F	F	F	F	F	F	F	F	F	F	F	F	F	F	F	F	F	F
AT1G07590	F	F	F	F	F	F	F	F	F	F	-	F	F	F	F	F	F	F	F	F	-	-	F	F	F	F	F	F	F	F	F	F	F	F	F	F	F	F	F	F	F	F	F
AT1G07600	F	F	F	F	F	F	F	F	F	F	-	F	F	F	F	F	F	F	F	F	-	-	F	F	F	F	F	F	F	F	F	F	F	F	F	F	F	F	F	F	F	F	F
AT1G07610	F	F	F	F	F	F	F	F	F	F	-	F	F	F	F	F	F	F	F	F	-	-	F	F	F	F	F	F	F	F	F	F	F	F	F	F	F	F	F	F	F	F	F
AT1G07615	F	F	F	F	F	F	F	F	F	F	-	F	F	F	F	F	F	F	F	F	-	-	F	F	F	F	F	F	F	F	F	F	F	F	F	F	F	F	F	F	F	F	F
AT1G07620	F	F	F	F	F	F	F	F	F	F	-	F	F	F	F	F	F	F	F	F	-	-	F	F	F	F	F	F	F	F	F	F	F	F	F	F	F	F	F	F	F	F	F
AT1G07630	F	F	F	F	F	F	F	F	F	F	-	F	F	F	F	F	F	F	F	F	-	-	F	F	F	F	F	F	F	F	F	F	F	F	F	F	F	F	F	F	F	F	F
AT1G07640	F	F	F	F	F	F	F	F	F	F	-	F	F	F	F	F	F	F	F	F	-	-	F	F	F	F	F	F	F	F	F	F	F	F	F	F	F	F	F	F	F	F	F
AT1G07645	F	F	F	F	F	F	F	F	F	F	-	F	F	F	F	F	F	F	F	F	-	-	F	F	F	F	F	F	F	F	F	F	F	F	F	F	F	F	F	F	F	F	F
AT1G07650	F	F	F	F	F	F	F	F	F	F	-	F	F	F	F	F	F	F	F	F	-	-	F	F	F	F	F	F	F	F	F	F	F	F	F	F	F	F	F	F	F	F	F
AT1G07660	F	F	F	F	F	F	F	F	F	F	-	F	F	F	F	F	F	F	F	F	-	-	F	F	F	F	F	F	F	F	F	F	F	F	F	F	F	F	F	F	F	F	F
AT1G07670	F	F	F	F	F	F	F	F	F	F	-	F	F	F	F	F	F	F	F	F	-	-	F	F	F	F	F	F	F	F	F	F	F	F	F	F	F	F	F	F	F	F	F
AT1G07680	F	F	F	F	F	F	F	F	F	F	-	F	F	F	F	F	F	F	F	F	-	-	F	F	F	F	F	F	F	F	F	F	F	F	F	F	F	F	F	F	F	F	F
AT1G07690	F	F	F	F	F	F	F	F	F	F	-	F	F	F	F	F	F	F	F	F	-	-	F	F	F	F	F	F	F	F	F	F	F	F	F	F	F	F	F	F	F	F	F
AT1G07700	F	F	F	F	F	F	F	F	F	F	-	F	F	F	F	F	F	F	F	F	-	-	F	F	F	F	F	F	F	F	F	F	F	F	F	F	F	F	F	F	F	F	F
AT1G07702	F	F	F	F	F	F	F	F	F	F	-	F	F	F	F	F	F	F	F	F	-	-	F	F	F	F	F	F	F	F	F	F	F	F	F	F	F	F	F	F	F	F	F
AT1G07705	F	F	F	F	F	F	F	F	F	F	-	F	F	F	F	F	F	F	F	F	-	-	F	F	F	F	F	F	F	F	F	F	F	F	F	F	F	F	F	F	F	F	F
AT1G07710	F	F	F	F	F	F	F	F	F	F	-	F	F	F	F	F	F	F	F	F	-	-	F	F	F	F	F	F	F	F	F	F	F	F	F	F	F	F	F	F	F	F	F
AT1G07720	F	F	F	F	F	F	F	F	F	F	-	F	F	F	F	F	F	F	F	F	-	-	F	F	F	F	F	F	F	F	F	F	F	F	F	F	F	F	F	F	F	F	F
AT1G07725	F	F	F	F	F	F	F	F	F	F	-	F	F	F	F	F	F	F	F	F	-	-	F	F	F	F	F	F	F	F	F	F	F	F	F	F	F	F	F	F	F	F	F
AT1G07728	F	F	F	F	F	F	F	F	F	F	-	F	F	F	F	F	F	F	F	F	-	-	F	F	F	F	F	F	F	F	F	F	F	F	F	F	F	F	F	F	F	F	F
AT1G07730	F	F	F	F	F	F	F	F	F	F	-	F	F	F	F	F	F	F	F	F	-	-	F	F	F	F	F	F	F	F	F	F	F	F	F	F	F	F	F	F	F	F	F
AT1G07740	F	F	F	F	F	F	F	F	F	F	-	F	F	F	F	F	F	F	F	F	-	-	F	F	F	F	F	F	F	F	F	F	F	F	F	F	F	F	F	F	F	F	F
AT1G07745	F	F	F	F	F	F	F	F	F	F	-	F	F	F	F	F	F	F	F	F	-	-	F	F	F	F	F	F	F	F	F	F	F	F	F	F	F	F	F	F	F	F	F
AT1G07747	F	F	F	F	F	F	F	F	F	F	-	F	F	F	F	F	F	F	F	F	-	-	F	F	F	F	F	F	F	F	F	F	F	F	F	F	F	F	F	F	F	F	F
AT1G07750	F	F	F	F	F	F	F	F	F	F	-	F	F	F	F	F	F	F	F	F	-	-	F	F	F	F	F	F	F	F	F	F	F	F	F	F	F	F	F	F	F	F	F
AT1G07760	F	F	F	F	F	F	F	F	F	F	-	F	F	F	F	F	F	F	F	F	-	-	F	F	F	F	F	F	F	F	F	F	F	F	F	F	F	F	F	F	F	F	F
AT1G07770	F	F	F	F	F	F	F	F	F	F	-	F	F	F	F	F	F	F	F	F	-	-	F	F	F	F	F	F	F	F	F	F	F	F	F	F	F	F	F	F	F	F	F
AT1G07780	F	F	F	F	F	F	F	F	F	F	-	F	F	F	F	F	F	F	F	F	-	-	F	F	F	F	F	F	F	F	F	F	F	F	F	F	F	F	F	F	F	F	F
AT1G07790	F	F	F	F	F	F	F	F	F	F	-	F	F	F	F	F	F	F	F	F	-	-	F	F	F	F	F	F	F	F	F	F	F	F	F	F	F	F	F	F	F	F	F
AT1G07795	F	F	F	F	F	F	F	F	F	F	-	F	F	F	F	F	F	F	F	F	-	-	F	F	F	F	F	F	F	F	F	F	F	F	F	F	F	F	F	F	F	F	F
AT1G07800	F	F	F	F	F	F	F	F	F	F	-	F	F	F	F	F	F	F	F	F	-	-	F	F	F	F	F	F	F	F	F	F	F	F	F	F	F	F	F	F	F	F	F
AT1G07810	F	F	F	F	F	F	F	F	F	F	-	F	F	F	F	F	F	F	F	F	-	-	F	F	F	F	F	F	F	F	F	F	F	F	F	F	F	F	F	F	F	F	F
AT1G07820	F	F	F	F	F	F	F	F	F	F	-	F	F	F	F	F	F	F	F	F	-	-	F	F	F	F	F	F	F	F	F	F	F	F	F	F	F	F	F	F	F	F	F
AT1G07830	F	F	F	F	F	F	F	F	F	F	-	F	F	F	F	F	F	F	F	F	-	-	F	F	F	F	F	F	F	F	F	F	F	F	F	F	F	F	F	F	F	F	F
AT1G07840	F	F	F	F	F	F	F	F	F	F	-	F	F	F	F	F	F	F	F	F	-	-	F	F	F	F	F	F	F	F	F	F	F	F	F	F	F	F	F	F	F	F	F
AT1G07850	F	F	F	F	F	F	F	F	F	F	-	F	F	F	F	F	F	F	F	F	-	-	F	F	F	F	F	F	F	F	F	F	F	F	F	F	F	F	F	F	F	F	F
AT1G07860	F	F	F	F	F	F	F	F	F	F	-	F	F	F	F	F	F	F	F	F	-	-	F	F	F	F	F	F	F	F	F	F	F	F	F	F	F	F	F	F	F	F	F
AT1G07870	F	F	F	F	F	F	F	F	F	F	-	F	F	F	F	F	F	F	F	F	-	-	F	F	F	F	F	F	F	F	F	F	F	F	F	F	F	F	F	F	F	F	F
AT1G07880	F	F	F	F	F	F	F	F	F	F	-	F	F	F	F	F	F	F	F	F	-	-	F	F	F	F	F	F	F	F	F	F	F	F	F	F	F	F	F	F	F	F	F
AT1G07890	F	F	F	F	F	F	F	F	F	F	-	F	F	F	F	F	F	F	F	F	-	-	F	F	F	F	F	F	F	F	F	F	F	F	F	F	F	F	F	F	F	F	F
AT1G07900	F	F	F	F	F	F	F	F	F	F	-	F	F	F	F	F	F	F	F	F	-	-	F	F	F	F	F	F	F	F	F	F	F	F	F	F	F	F	F	F	F	F	F
AT1G07901	F	F	F	F	F	F	F	F	F	F	-	F	F	F	F	F	F	F	F	F	-	-	F	F	F	F	F	F	F	F	F	F	F	F	F	F	F	F	F	F	F	F	F
AT1G07910	F	F	F	F	F	F	F	F	F	F	-	F	F	F	F	F	F	F	F	F	-	-	F	F	F	F	F	F	F	F	F	F	F	F	F	F	F	F	F	F	F	F	F
AT1G07920	F	F	F	F	F	F	F	F	F	F	-	F	F	F	F	F	F	F	F	F	-	-	F	F	F	F	F	F	F	F	F	F	F	F	F	F	F	F	F	F	F	F	F
AT1G07930	F	F	F	F	F	F	F	F	F	F	-	F	F	F	F	F	F	F	F	F	-	-	F	F	F	F	F	F	F	F	F	F	F	F	F	F	F	F	F	F	F	F	F
AT1G07940	F	F	F	F	F	F	F	F	F	F	-	F	F	F	F	F	F	F	F	F	-	-	F	F	F	F	F	F	F	F	F	F	F	F	F	F	F	F	F	F	F	F	F
AT1G07950	F	F	F	F	F	F	F	F	F	F	-	F	F	F	F	F	F	F	F	F	-	-	F	F	F	F	F	F	F	F	F	F	F	F	F	F	F	F	F	F	F	F	F
AT1G07960	F	F	F	F	F	F	F	F	F	F	-	F	F	F	F	F	F	F	F	F	-	-	F	F	F	F	F	F	F	F	F	F	F	F	F	F	F	F	F	F	F	F	F
AT1G07970	F	F	F	F	F	F	F	F	F	F	-	F	F	F	F	F	F	F	F	F	-	-	F	F	F	F	F	F	F	F	F	F	F	F	F	F	F	F	F	F	F	F	F
AT1G07985	F	F	F	F	F	F	F	F	F	F	-	F	F	F	F	F	F	F	F	F	-	-	F	F	F	F	F	F	F	F	F	F	F	F	F	F	F	F	F	F	F	F	F
AT1G07990	F	F	F	F	F	F	F	F	F	F	-	F	F	F	F	F	F	F	F	F	-	-	F	F	F	F	F	F	F	F	F	F	F	F	F	F	F	F	F	F	F	F	F
AT1G08000	F	F	F	F	F	F	F	F	F	F	-	F	F	F	F	F	F	F	F	F	-	-	F	F	F	F	F	F	F	F	F	F	F	F	F	F	T	F	F	F	F	F	F
AT1G08005	F	F	F	F	F	F	F	F	F	F	-	F	F	F	F	F	F	F	F	F	-	-	F	F	F	F	F	F	F	F	F	F	F	F	F	F	T	F	F	F	F	F	F
AT1G08010	F	F	F	F	F	F	F	F	F	F	-	F	F	F	F	F	F	F	F	F	-	-	F	F	F	F	F	F	F	F	F	F	F	F	F	F	T	F	F	F	F	F	F
AT1G08030	F	F	F	F	F	F	F	F	F	F	-	F	F	F	F	F	F	F	F	F	-	-	F	F	F	F	F	F	F	F	F	F	F	F	F	F	F	F	F	F	F	F	F
AT1G08035	F	F	F	F	F	F	F	F	F	F	-	F	F	F	F	F	F	F	F	F	-	-	F	F	F	F	F	F	F	F	F	F	F	F	F	F	F	F	F	F	F	F	F
AT1G08040	F	F	F	F	F	F	F	F	F	F	-	F	F	F	F	F	F	F	F	F	-	-	F	F	F	F	F	F	F	F	F	F	F	F	F	F	F	F	F	F	F	F	F
AT1G08050	F	F	F	F	F	F	F	F	F	F	-	F	F	F	F	F	F	F	F	F	-	-	F	F	F	F	F	F	F	F	F	F	F	F	F	F	F	F	F	F	F	F	F
AT1G08060	F	F	F	F	F	F	F	F	F	F	-	F	F	F	F	F	F	F	F	F	-	-	F	F	F	F	F	F	F	F	F	F	F	F	F	F	F	F	F	F	F	F	F
AT1G08065	F	F	F	F	F	F	F	F	F	F	-	F	F	F	F	F	F	F	F	F	-	-	F	F	F	F	F	F	F	F	F	F	F	F	F	F	F	F	F	F	F	F	F
AT1G08070	F	F	F	F	F	F	F	F	F	F	-	F	F	F	F	F	F	F	F	F	-	-	F	F	F	F	F	F	F	F	F	F	F	F	F	F	F	F	F	F	F	F	F
AT1G08080	F	F	F	F	F	F	F	F	F	F	-	F	F	F	F	F	F	F	F	F	-	-	F	F	F	F	F	F	F	F	F	F	F	F	F	F	F	F	F	F	F	F	F
AT1G08090	F	F	F	F	F	F	F	F	F	F	-	F	F	F	F	F	F	F	F	F	-	-	F	F	F	F	F	F	F	F	F	F	F	F	F	F	F	F	F	F	F	F	F
AT1G08100	F	F	F	F	F	F	F	F	F	F	-	F	F	F	F	F	F	F	F	F	-	-	F	F	F	F	F	F	F	F	F	F	F	F	F	F	F	F	F	F	F	F	F
AT1G08105	F	F	F	F	F	F	F	F	F	F	-	F	F	F	F	F	F	F	F	F	-	-	F	F	F	F	F	F	F	F	F	F	F	F	F	F	F	F	F	F	F	F	F
AT1G08110	F	F	F	F	F	F	F	F	F	F	-	F	F	F	F	F	F	F	F	F	-	-	F	F	F	F	F	F	F	F	F	F	F	F	F	F	F	F	F	F	F	F	F
AT1G08120	F	F	F	F	F	F	F	F	F	F	-	F	F	F	F	F	F	F	F	F	-	-	F	F	F	F	F	F	F	F	F	F	F	F	F	F	F	F	F	F	F	F	F
AT1G08125	F	F	F	F	F	F	F	F	F	F	-	F	F	F	F	F	F	F	F	F	-	-	F	F	F	F	F	F	F	F	F	F	F	F	F	F	F	F	F	F	F	F	F
AT1G08130	F	F	F	F	F	F	F	F	F	F	-	F	F	F	F	F	F	F	F	F	-	-	F	F	F	F	F	F	F	F	F	F	F	F	F	F	F	F	F	F	F	F	F
AT1G08135	F	F	F	F	F	F	F	F	F	F	-	F	F	F	F	F	F	F	F	F	-	-	F	F	F	F	F	F	F	F	F	F	F	F	F	F	F	F	F	F	F	F	F
AT1G08140	F	F	F	F	F	F	F	F	F	F	-	F	F	F	F	F	F	F	F	F	-	-	F	F	F	F	F	F	F	F	F	F	F	F	F	F	F	F	F	F	F	F	F
AT1G08150	F	F	F	F	F	F	F	F	F	F	-	F	F	F	F	F	F	F	F	F	-	-	F	F	F	F	F	F	F	F	F	F	F	F	F	F	F	F	F	F	F	F	F
AT1G08160	F	F	F	F	F	F	F	F	F	F	-	F	F	F	F	F	F	F	F	F	-	-	F	F	F	F	F	F	F	F	F	F	F	F	F	F	F	F	F	F	F	F	F
AT1G08165	F	F	F	F	F	F	F	F	F	F	-	F	F	F	F	F	F	F	F	F	-	-	F	F	F	F	F	F	F	F	F	F	F	F	F	F	F	F	F	F	F	F	F
AT1G08170	F	F	F	F	F	F	F	F	F	F	-	F	F	F	F	F	F	F	F	F	-	-	F	F	F	F	F	F	F	F	F	F	F	F	F	F	F	F	F	F	F	F	F
AT1G08180	F	F	F	F	F	F	F	F	F	F	-	F	F	F	F	F	F	F	F	F	-	-	F	F	F	F	F	F	F	F	F	F	F	F	F	F	F	F	F	F	F	F	F
AT1G08190	F	F	F	F	F	F	F	F	F	F	-	F	F	F	F	F	F	F	F	F	-	-	F	F	F	F	F	F	F	F	F	F	F	F	F	F	F	F	F	F	F	F	F
AT1G08200	F	F	F	F	F	F	F	F	F	F	-	F	F	F	F	F	F	F	F	F	-	-	F	F	F	F	F	F	F	F	F	F	F	F	F	F	F	F	F	F	F	F	F
AT1G08210	F	F	F	F	F	F	F	F	F	F	-	F	F	F	F	F	F	F	F	F	-	-	F	F	F	F	F	F	F	F	F	F	F	F	F	F	F	F	F	F	F	F	F
AT1G08220	F	F	F	F	F	F	F	F	F	F	-	F	F	F	F	F	F	F	F	F	-	-	F	F	F	F	F	F	F	F	F	F	F	F	F	F	F	F	F	F	F	F	F
AT1G08230	F	F	F	F	F	F	F	F	F	F	-	F	F	F	F	F	F	F	F	F	-	-	F	F	F	F	F	F	F	F	F	F	F	F	F	F	F	F	F	F	F	F	F
AT1G08260	F	F	F	F	F	F	F	F	F	F	-	F	F	F	F	F	F	F	F	F	-	-	F	F	F	F	F	F	F	F	F	F	F	F	F	F	F	F	F	F	F	F	F
AT1G08270	F	F	F	F	F	F	F	F	F	F	-	F	F	F	F	F	F	F	F	F	-	-	F	F	F	F	F	F	F	F	F	F	F	F	F	F	F	F	F	F	F	F	F
AT1G08280	F	F	F	F	F	F	F	F	F	F	-	F	F	F	F	F	F	F	F	F	-	-	F	F	F	F	F	F	F	F	F	F	F	F	F	F	F	F	F	F	F	F	F
AT1G08290	F	F	F	F	F	F	F	F	F	F	-	F	F	F	F	F	F	F	F	F	-	-	F	F	F	F	F	F	F	F	F	F	F	F	F	F	F	F	F	F	F	F	F
AT1G08300	F	F	F	F	F	F	F	F	F	F	-	F	F	F	F	F	F	F	F	F	-	-	F	F	F	F	F	F	F	F	F	F	F	F	F	F	F	F	F	F	F	F	F
AT1G08310	F	F	F	F	F	F	F	F	F	F	-	F	F	F	F	F	F	F	F	F	-	-	F	F	F	F	F	F	F	F	F	F	F	F	F	F	F	F	F	F	F	F	F
AT1G08315	F	F	F	F	F	F	F	F	F	F	-	F	F	F	F	F	F	F	F	F	-	-	F	F	F	F	F	F	F	F	F	F	F	F	F	F	F	F	F	F	F	F	F
AT1G08320	F	F	F	F	F	F	F	F	F	F	-	F	F	F	F	F	F	F	F	F	-	-	F	F	F	F	F	F	F	F	F	F	F	F	F	F	F	F	F	F	F	F	F
AT1G08340	F	F	F	F	F	F	F	F	F	F	-	F	F	F	F	F	F	F	F	F	-	-	F	F	F	F	F	F	F	F	F	F	F	F	F	F	F	F	F	F	F	F	F
AT1G08350	F	F	F	F	F	F	F	F	F	F	-	F	F	F	F	F	F	F	F	F	-	-	F	F	F	F	F	F	F	F	F	F	F	F	F	F	F	F	F	F	F	F	F
AT1G08360	F	F	F	F	F	F	F	F	F	F	-	F	F	F	F	F	F	F	F	F	-	-	F	F	F	F	F	F	F	F	F	F	F	F	F	F	F	F	F	F	F	F	F
AT1G08370	F	F	F	F	F	F	F	F	F	F	-	F	F	F	F	F	F	F	F	F	-	-	F	F	F	F	F	F	F	F	F	F	F	F	F	F	F	F	F	F	F	F	F
AT1G08380	F	F	F	F	F	F	F	F	F	F	-	F	F	F	F	F	F	F	F	F	-	-	F	F	F	F	F	F	F	F	F	F	F	F	F	F	F	F	F	F	F	F	F
AT1G08390	F	F	F	F	F	F	F	F	F	F	-	F	F	F	F	F	F	F	F	F	-	-	F	F	F	F	F	F	F	F	F	F	F	F	F	F	F	F	F	F	F	F	F
AT1G08400	F	F	F	F	F	F	F	F	F	F	-	F	F	F	F	F	F	F	F	F	-	-	F	F	F	F	F	F	F	F	F	F	F	F	F	F	F	F	F	F	F	F	F
AT1G08410	F	F	F	F	F	F	F	F	F	F	-	F	F	F	F	F	F	F	F	F	-	-	F	F	F	F	F	F	F	F	F	F	F	F	F	F	F	F	F	F	F	F	F
AT1G08420	F	F	F	F	F	F	F	F	F	F	-	F	F	F	F	F	F	F	F	F	-	-	F	F	F	F	F	F	F	F	F	F	F	F	F	F	F	F	F	F	F	F	F
AT1G08430	F	F	F	F	F	F	F	F	F	F	-	F	F	F	F	F	F	F	F	F	-	-	F	F	F	F	F	F	F	F	F	F	F	F	F	F	F	F	F	F	F	F	F
AT1G08440	F	F	F	F	F	F	F	F	F	F	-	F	F	F	F	F	F	F	F	F	-	-	F	F	F	F	T	F	T	F	F	F	F	F	F	F	F	F	F	F	F	F	F
AT1G08450	F	F	F	F	F	F	F	F	F	F	-	F	F	F	F	F	F	F	F	F	-	-	F	F	F	F	F	F	F	F	F	F	F	F	F	F	F	F	F	F	F	F	F
AT1G08460	F	F	F	F	F	F	F	F	F	F	-	F	F	F	F	F	F	F	F	F	-	-	F	F	F	F	F	F	F	F	F	F	F	F	F	F	F	F	F	F	F	F	F
AT1G08465	F	F	F	F	F	F	F	F	F	F	-	F	F	F	F	F	F	F	F	F	-	-	F	F	F	F	F	F	F	F	F	F	F	F	F	F	F	F	F	F	F	F	F
AT1G08470	F	F	F	F	F	F	F	F	F	F	-	F	F	F	F	F	F	F	F	F	-	-	F	F	F	F	F	F	F	F	F	F	F	F	F	F	F	F	F	F	F	F	F
AT1G08480	F	F	F	F	F	F	F	F	F	F	-	F	F	F	F	F	F	F	F	F	-	-	F	F	F	F	F	F	F	F	F	F	F	F	F	F	F	F	F	F	F	F	F
AT1G08490	F	F	F	F	F	F	F	F	F	F	-	F	F	F	F	F	F	F	F	F	-	-	F	F	F	F	F	F	F	F	F	F	F	F	F	F	F	F	F	F	F	F	F
AT1G08500	F	F	F	F	F	F	F	F	F	F	-	F	F	F	F	F	F	F	F	F	-	-	F	F	F	F	F	F	F	F	F	F	F	F	F	F	F	F	F	F	F	F	F
AT1G08510	F	F	F	F	F	F	F	F	F	F	-	F	F	F	F	F	F	F	F	F	-	-	F	F	F	F	F	F	F	F	F	F	F	F	F	F	F	F	F	F	F	F	F
AT1G08520	F	F	F	F	F	F	F	F	F	F	-	F	F	F	F	F	F	F	F	F	-	-	F	F	F	F	F	F	F	F	F	F	F	F	F	F	F	F	F	F	F	F	F
AT1G08530	F	F	F	F	F	F	F	F	F	F	-	F	F	F	F	F	F	F	F	F	-	-	F	F	F	F	F	F	F	F	F	F	F	F	F	F	F	F	F	F	F	F	F
AT1G08540	F	F	F	F	F	F	F	F	F	F	-	F	F	F	F	F	F	F	F	F	-	-	F	F	F	F	F	F	F	F	F	F	F	F	F	F	F	F	F	F	F	F	F
AT1G08550	F	F	F	F	F	F	F	F	F	F	-	F	F	F	F	F	F	F	F	F	-	-	F	F	F	F	F	F	F	F	F	F	F	F	F	F	F	F	F	F	F	F	F
AT1G08560	F	F	F	F	F	F	F	F	F	F	-	F	F	F	F	F	F	F	F	F	-	-	F	F	F	F	F	F	F	F	F	F	F	F	F	F	F	F	F	F	F	F	F
AT1G08570	F	F	F	F	F	F	F	F	F	F	-	F	F	F	F	F	F	F	F	F	-	-	F	F	F	F	F	F	F	F	F	F	F	F	F	F	F	F	F	F	F	F	F
AT1G08580	F	F	F	F	F	F	F	F	F	F	-	F	F	F	F	F	F	F	F	F	-	-	F	F	F	F	F	F	F	F	F	F	F	F	F	F	F	F	F	F	F	F	F
AT1G08590	F	F	F	F	F	F	F	F	F	F	-	F	F	F	F	F	F	F	F	F	-	-	F	F	F	F	F	F	F	F	F	F	F	F	F	F	F	F	F	F	F	F	F
AT1G08600	F	F	F	F	F	F	F	F	F	F	-	F	F	F	F	F	F	F	F	F	-	-	F	F	F	F	F	F	F	F	F	F	F	F	F	F	F	F	F	F	F	F	F
AT1G08610	F	F	F	F	F	F	F	F	F	F	-	F	F	F	F	F	F	F	F	F	-	-	F	F	F	F	F	F	F	F	F	F	F	F	F	F	F	F	F	F	F	F	F
AT1G08620	F	F	F	F	F	F	F	F	F	F	-	F	F	F	F	F	F	F	F	F	-	-	F	F	F	F	F	F	F	F	F	F	F	F	F	F	F	F	F	F	F	F	F
AT1G08630	F	F	F	F	F	F	F	F	F	F	-	F	F	F	F	F	F	F	F	F	-	-	F	F	F	F	F	F	F	F	F	F	F	F	F	F	F	F	F	F	F	F	F
AT1G08640	F	F	F	F	F	F	F	F	F	F	-	F	F	F	F	F	F	F	F	F	-	-	F	F	F	F	F	F	F	F	F	F	F	F	F	F	F	F	F	F	F	F	F
AT1G08650	F	F	F	F	F	F	F	F	F	F	-	F	F	F	F	F	F	F	F	F	-	-	F	F	F	F	F	F	F	F	F	F	F	F	F	F	F	F	F	F	F	F	F
AT1G08660	F	F	F	F	F	F	F	F	F	F	-	F	F	F	F	F	F	F	F	F	-	-	F	F	F	F	F	F	F	F	F	F	F	F	F	F	F	F	F	F	F	F	F
AT1G08670	F	F	F	F	F	F	F	F	F	F	-	F	F	F	F	F	F	F	F	F	-	-	F	F	F	F	F	F	F	F	F	F	F	F	F	F	F	F	F	F	F	F	F
AT1G08680	F	F	F	F	F	F	F	F	F	F	-	F	F	F	F	F	F	F	F	F	-	-	F	F	F	F	F	F	F	F	F	F	F	F	F	F	F	F	F	F	F	F	F
AT1G08695	F	F	F	F	F	F	F	F	F	F	-	F	F	F	F	F	F	F	F	F	-	-	F	F	F	F	F	F	F	F	F	F	F	F	F	F	F	F	F	F	F	F	F
AT1G08700	F	F	F	F	F	F	F	F	F	F	-	F	F	F	F	F	F	F	F	F	-	-	F	F	F	F	F	F	F	F	F	F	F	F	F	F	F	F	F	F	F	F	F
AT1G08710	F	F	F	F	F	F	F	F	F	F	-	F	F	F	F	F	F	F	F	F	-	-	F	F	F	F	F	F	F	F	F	F	F	F	F	F	F	F	F	F	F	F	F
AT1G08720	F	F	F	F	F	F	F	F	F	F	-	F	F	F	F	F	F	F	F	F	-	-	F	F	F	F	F	F	F	F	F	F	F	F	F	F	F	F	F	F	F	F	F
AT1G08730	F	F	F	F	F	F	F	F	F	F	-	F	F	F	F	F	F	F	F	F	-	-	F	F	F	F	F	F	F	F	F	F	F	F	F	F	F	F	F	F	F	F	F
AT1G08750	F	F	F	F	F	F	F	F	F	F	-	F	F	F	F	F	F	F	F	F	-	-	F	F	F	F	F	F	F	F	F	F	F	F	F	F	F	F	F	F	F	F	F
AT1G08760	F	F	F	F	F	F	F	F	F	F	-	F	F	F	F	F	F	F	F	F	-	-	F	F	F	F	F	F	F	F	F	F	F	F	F	F	F	F	F	F	F	F	F
AT1G08770	F	F	F	F	F	F	F	F	F	F	-	F	F	F	F	F	F	F	F	F	-	-	F	F	F	F	F	F	F	F	F	F	F	F	F	F	F	F	F	F	F	F	F
AT1G08780	F	F	F	F	F	F	F	F	F	F	-	F	F	F	F	F	F	F	F	F	-	-	F	F	F	F	F	F	F	F	F	F	F	F	F	F	F	F	F	F	F	F	F
AT1G08790	F	F	F	F	F	F	F	F	F	F	-	F	F	F	F	F	F	F	F	F	-	-	F	F	F	F	F	F	F	F	F	F	F	F	F	F	F	F	F	F	F	F	F
AT1G08800	F	F	F	F	F	F	F	F	F	F	-	F	F	F	F	F	F	F	F	F	-	-	F	F	F	F	F	F	F	F	F	F	F	F	F	F	F	F	F	F	F	F	F
AT1G08810	F	F	F	F	F	F	F	F	F	F	-	F	F	F	F	F	F	F	F	F	-	-	F	F	F	F	F	F	F	F	F	F	F	F	F	F	F	F	F	F	F	F	F
AT1G08820	F	F	F	F	F	F	F	F	F	F	-	F	F	F	F	F	F	F	F	F	-	-	F	F	F	F	F	F	F	F	F	F	F	F	F	F	F	F	F	F	F	F	F
AT1G08830	F	F	F	F	F	F	F	F	F	F	-	F	F	F	F	F	F	F	F	F	-	-	F	F	F	F	F	F	F	F	F	F	F	F	F	F	F	F	F	F	F	F	F
AT1G08840	F	F	F	F	F	F	F	F	F	F	-	F	F	F	F	F	F	F	F	F	-	-	F	F	F	F	F	T	F	F	F	F	F	F	F	F	F	F	F	F	F	F	F
AT1G08845	F	F	F	F	F	F	F	F	F	F	-	F	F	F	F	F	F	F	F	F	-	-	F	F	F	F	F	F	F	F	F	F	F	F	F	F	F	F	F	F	F	F	F
AT1G08860	F	F	F	F	F	F	F	F	F	F	-	F	F	F	F	F	F	F	F	F	-	-	F	F	F	F	F	F	F	F	F	F	F	F	F	F	F	F	F	F	F	F	F
AT1G08870	F	F	F	F	F	F	F	F	F	F	-	F	F	F	F	F	F	F	F	F	-	-	F	F	F	F	F	F	F	F	F	F	F	F	F	F	F	F	F	F	F	F	F
AT1G08880	F	F	F	F	F	F	F	F	F	F	-	F	F	F	F	F	F	F	F	F	-	-	F	F	F	F	F	F	F	F	F	F	F	F	F	F	F	F	F	F	F	F	F
AT1G08890	F	F	F	F	F	F	F	F	F	F	-	F	F	F	F	F	F	F	F	F	-	-	F	F	F	F	F	F	F	F	F	F	F	F	F	F	F	F	F	F	F	F	F
AT1G08900	F	F	F	F	F	F	F	F	F	F	-	F	F	F	F	F	F	F	F	F	-	-	F	F	F	F	F	F	F	F	F	F	F	F	F	F	F	F	F	F	F	F	F
AT1G08910	F	F	F	F	F	F	F	F	F	F	-	F	F	F	F	F	F	F	F	F	-	-	F	F	F	F	F	F	F	F	F	F	F	F	F	F	F	F	F	F	F	F	F
AT1G08920	F	F	F	F	F	F	F	F	F	F	-	F	F	F	F	F	F	F	F	F	-	-	F	F	F	F	F	F	F	F	F	F	F	F	F	F	F	F	F	F	F	F	F
AT1G08930	F	F	F	F	F	F	F	F	F	F	-	F	F	F	F	F	F	F	F	F	-	-	F	F	F	F	F	F	F	F	F	F	F	F	F	F	F	F	F	F	F	F	F
AT1G08940	F	F	F	F	F	F	F	F	F	F	-	F	F	F	F	F	F	F	F	F	-	-	F	F	F	F	F	F	F	F	F	F	F	F	F	F	F	F	F	F	F	F	F
AT1G08950	F	F	F	F	F	F	F	F	F	F	-	F	F	F	F	F	F	F	F	F	-	-	F	F	F	F	F	F	F	F	F	F	F	F	F	F	F	F	F	F	F	F	F
AT1G08960	F	F	F	F	F	F	F	F	F	F	-	F	F	F	F	F	F	F	F	F	-	-	F	F	F	F	F	F	F	F	F	F	F	F	F	F	F	F	F	F	F	F	F
AT1G08970	F	F	F	F	F	F	F	F	F	F	-	F	F	F	F	F	F	F	F	F	-	-	F	F	F	F	F	F	F	F	F	F	F	F	F	F	F	F	F	F	F	F	F
AT1G08980	F	F	F	F	F	F	F	F	F	F	-	F	F	F	F	F	F	F	F	F	-	-	F	F	F	F	F	F	F	F	F	F	F	F	F	F	F	F	F	F	F	F	F
AT1G08985	F	F	F	F	F	F	F	F	F	F	-	F	F	F	F	F	F	F	F	F	-	-	F	F	F	F	F	F	F	F	F	F	F	F	F	F	F	F	F	F	F	F	F
AT1G08990	F	F	F	F	F	F	F	F	F	F	-	F	F	F	F	F	F	F	F	F	-	-	F	F	F	F	F	F	F	F	F	F	F	F	F	F	F	F	F	F	F	F	F
AT1G09000	F	F	F	F	F	F	F	F	F	F	-	F	F	F	F	F	F	F	F	F	-	-	F	F	F	F	F	F	F	F	F	F	F	F	F	F	F	F	F	F	F	F	F
AT1G09010	F	F	F	F	F	F	F	F	F	F	-	F	F	F	F	F	F	F	F	F	-	-	F	F	F	F	F	F	F	F	F	F	F	F	F	F	F	F	F	F	F	F	F
AT1G09020	F	F	F	F	F	F	F	F	F	F	-	F	F	F	F	F	F	F	F	F	-	-	F	F	F	F	F	F	F	F	F	F	F	F	F	F	F	F	F	F	F	F	F
AT1G09026	F	F	F	F	F	F	F	F	F	F	-	F	F	F	F	F	F	F	F	F	-	-	F	F	F	F	F	F	F	F	F	F	F	F	F	F	F	F	F	F	F	F	F
AT1G09030	F	F	F	F	F	F	F	F	F	F	-	F	F	F	F	F	F	F	F	F	-	-	F	F	F	F	F	F	F	F	F	F	F	F	F	F	F	F	F	F	F	F	F
AT1G09040	F	F	F	F	F	F	F	F	F	F	-	F	F	F	F	F	F	F	F	F	-	-	F	F	F	F	F	F	F	F	F	F	F	F	F	F	F	F	F	F	F	F	F
AT1G09050	F	F	F	F	F	F	F	F	F	F	-	F	F	F	F	F	F	F	F	F	-	-	F	F	F	F	F	F	F	F	F	F	F	F	F	F	F	F	F	F	F	F	F
AT1G09060	F	F	F	F	F	F	F	F	F	F	-	F	F	F	F	F	F	F	F	F	-	-	F	F	F	F	F	F	F	F	F	F	F	F	F	F	F	F	F	F	F	F	F
AT1G09070	F	F	F	F	F	F	F	F	F	F	-	F	F	F	F	F	F	F	F	F	-	-	F	F	F	F	F	F	F	F	F	F	F	F	F	F	F	F	F	F	F	F	F
AT1G09080	F	F	F	F	F	F	F	F	F	F	-	F	F	F	F	F	F	F	F	F	-	-	F	F	F	F	F	F	F	F	F	F	F	F	F	F	F	F	F	F	F	F	F
AT1G09090	F	F	F	F	F	F	F	F	F	F	-	F	F	F	F	F	F	F	F	F	-	-	F	F	F	F	F	F	F	F	F	F	F	F	F	F	F	F	F	F	F	F	F
AT1G09100	F	F	F	F	F	F	F	F	F	F	-	F	F	F	F	F	F	F	F	F	-	-	F	F	F	F	F	F	F	F	F	F	F	F	F	F	F	F	F	F	F	F	F
AT1G09110	F	F	F	F	F	F	F	F	F	F	-	F	F	F	F	F	F	F	F	F	-	-	F	F	F	F	F	F	F	F	F	F	F	F	F	F	F	F	F	F	F	F	F
AT1G09130	F	F	F	F	F	F	F	F	F	F	-	F	F	F	F	F	F	F	F	F	-	-	F	F	F	F	F	F	F	F	F	F	F	F	F	F	F	F	F	F	F	F	F
AT1G09140	F	F	F	F	F	F	F	F	F	F	-	F	F	F	F	F	F	F	F	F	-	-	F	F	F	F	F	F	F	F	F	F	F	F	F	F	F	F	F	F	F	F	F
AT1G09150	F	F	F	F	F	F	F	F	F	F	-	F	F	F	F	F	F	F	F	F	-	-	F	F	F	F	F	F	F	F	F	F	F	F	F	F	F	F	F	F	F	F	F
AT1G09155	F	F	F	F	F	F	F	F	F	F	-	F	F	F	F	F	F	F	F	F	-	-	F	F	F	F	F	F	F	F	F	F	F	F	F	F	F	F	F	F	F	F	F
AT1G09157	F	F	F	F	F	F	F	F	F	F	-	F	F	F	F	F	F	F	F	F	-	-	F	F	F	F	F	F	F	F	F	F	F	F	F	F	F	F	F	F	F	F	F
AT1G09160	F	F	F	F	F	F	F	F	F	F	-	F	F	F	F	F	F	F	F	F	-	-	F	F	F	F	F	F	F	F	F	F	F	F	F	F	F	F	F	F	F	F	F
AT1G09170	F	F	F	F	F	F	F	F	F	F	-	F	F	F	F	F	F	F	F	F	-	-	F	F	F	F	F	F	F	F	F	F	F	F	F	F	F	F	F	F	F	F	F
AT1G09176	F	F	F	F	F	F	F	F	F	F	-	F	F	F	F	F	F	F	F	F	-	-	F	F	F	F	F	F	F	F	F	F	F	F	F	F	F	F	F	F	F	F	F
AT1G09180	F	F	F	F	F	F	F	F	F	F	-	F	F	F	F	F	F	F	F	F	-	-	F	F	F	F	F	F	F	F	F	F	F	F	F	F	F	F	F	F	F	F	F
AT1G09190	F	F	F	F	F	F	F	F	F	F	-	F	F	F	F	F	F	F	F	F	-	-	F	F	F	F	F	F	F	F	F	F	F	F	F	F	F	F	F	F	F	F	F
AT1G09195	F	F	F	F	F	F	F	F	F	F	-	F	F	F	F	F	F	F	F	F	-	-	F	F	F	F	F	F	F	F	F	F	F	F	F	F	F	F	F	F	F	F	F
AT1G09200	F	F	F	F	F	F	F	F	F	F	-	F	F	F	F	F	F	F	F	F	-	-	F	F	F	F	F	F	F	F	F	F	F	F	F	F	F	F	F	F	F	F	F
AT1G09210	F	F	F	F	F	F	F	F	F	F	-	F	F	F	F	F	F	F	F	F	-	-	F	F	F	F	F	F	F	F	F	F	F	F	F	F	F	F	F	F	F	F	F
AT1G09220	F	F	F	F	F	F	F	F	F	F	-	F	F	F	F	F	F	F	F	F	-	-	F	F	F	F	F	F	F	F	F	F	F	F	F	F	F	F	F	F	F	F	F
AT1G09230	F	F	F	F	F	F	F	F	F	F	-	F	F	F	F	F	F	F	F	F	-	-	F	F	F	F	F	F	F	F	F	F	F	F	F	F	F	F	F	F	F	F	F
AT1G09240	F	F	F	F	F	F	F	F	F	F	-	F	F	F	F	F	F	F	F	F	-	-	F	F	F	F	F	F	F	F	F	F	F	F	F	F	F	F	F	F	F	F	F
AT1G09245	F	F	F	F	F	F	F	F	F	F	-	F	F	F	F	F	F	F	F	F	-	-	F	F	F	F	F	F	F	F	F	F	F	F	F	F	F	F	F	F	F	F	F
AT1G09250	F	F	F	F	F	F	F	F	F	F	-	F	F	F	F	F	F	F	F	F	-	-	F	F	F	F	F	F	F	F	F	F	F	F	F	F	F	F	F	F	F	F	F
AT1G09260	F	F	F	F	F	F	F	F	F	F	-	F	F	F	F	F	F	F	F	F	-	-	F	F	F	F	F	F	F	F	F	F	F	F	F	F	F	F	F	F	F	F	F
AT1G09270	F	F	F	F	F	F	F	F	F	F	-	F	F	F	F	F	F	F	F	F	-	-	F	F	F	F	F	F	F	F	F	F	F	F	F	F	F	F	F	F	F	F	F
AT1G09280	F	F	F	F	F	F	F	F	F	F	-	F	F	F	F	F	F	F	F	F	-	-	F	F	F	F	F	F	F	F	F	F	F	F	F	T	F	F	F	F	F	F	F
AT1G09290	F	F	F	F	F	F	F	F	F	F	-	F	F	F	F	F	F	F	F	F	-	-	F	F	F	F	F	F	F	F	F	F	F	F	F	F	F	F	F	F	F	F	F
AT1G09300	F	F	F	F	F	F	F	F	F	T	-	F	F	F	F	F	F	F	F	F	-	-	F	F	F	F	F	F	F	F	F	F	F	F	F	T	F	F	F	F	F	F	F
AT1G09310	F	F	F	F	F	F	F	F	F	F	-	F	F	F	F	F	F	F	F	F	-	-	F	F	F	F	F	F	F	F	F	F	F	F	F	F	F	F	F	F	F	F	F
AT1G09320	F	F	F	F	F	F	F	F	F	F	-	F	F	F	F	F	F	F	F	F	-	-	F	F	F	F	F	F	F	F	F	F	F	F	F	F	F	F	F	F	F	F	F
AT1G09330	F	F	F	F	F	F	F	F	F	F	-	F	F	F	F	F	F	F	F	F	-	-	F	F	F	F	F	F	F	F	F	F	F	F	F	F	F	F	F	F	F	F	F
AT1G09340	F	F	F	F	F	F	F	F	F	F	-	F	F	F	F	F	F	F	F	F	-	-	F	F	F	F	F	F	F	F	F	F	F	F	F	F	F	F	F	F	F	F	F
AT1G09350	F	F	F	F	F	F	F	F	F	F	-	F	F	F	F	F	F	F	F	F	-	-	F	F	F	F	F	F	F	F	F	F	F	F	F	F	F	F	F	F	F	F	F
AT1G09360	F	F	F	F	F	F	F	F	F	F	-	F	F	F	F	F	F	F	F	F	-	-	F	F	F	F	F	F	F	F	F	F	F	F	F	F	F	F	F	F	F	F	F
AT1G09370	F	F	F	F	F	F	F	F	F	F	-	F	F	F	F	F	F	F	F	F	-	-	F	F	F	F	F	F	F	F	F	F	F	F	F	F	F	F	F	F	F	F	F
AT1G09380	F	F	F	F	F	F	F	F	F	F	-	F	F	F	F	F	F	F	F	F	-	-	F	F	F	F	F	F	F	F	F	F	F	F	F	F	F	F	F	F	F	F	F
AT1G09390	F	F	F	F	F	F	F	F	F	F	-	F	F	F	F	F	F	F	F	F	-	-	F	F	F	F	F	F	F	F	F	F	F	F	F	F	F	F	F	F	F	F	F
AT1G09400	F	F	F	F	F	F	F	F	F	F	-	F	F	F	F	F	F	F	F	F	-	-	F	F	F	F	F	F	F	F	F	F	F	F	F	F	F	F	F	F	F	F	F
AT1G09410	F	F	F	F	F	F	F	F	F	F	-	F	F	F	F	F	F	F	F	F	-	-	F	F	F	F	F	F	F	F	F	F	F	F	F	F	F	F	F	F	F	F	F
AT1G09415	F	F	F	F	F	F	F	F	F	F	-	F	F	F	F	F	F	F	F	F	-	-	F	F	F	F	F	F	F	F	F	F	F	F	F	F	F	F	F	F	F	F	F
AT1G09420	F	F	F	F	F	F	F	F	F	F	-	F	F	F	F	F	F	F	F	F	-	-	F	F	F	F	F	F	F	F	F	F	F	F	F	F	F	F	F	F	F	F	F
AT1G09421	F	F	F	F	F	F	F	F	F	F	-	F	F	F	F	F	F	F	F	F	-	-	F	F	F	F	F	F	F	F	F	F	F	F	F	F	F	F	F	F	F	F	F
AT1G09430	F	F	F	F	F	F	F	F	F	F	-	F	F	F	F	F	F	F	F	F	-	-	F	F	F	F	F	F	F	F	F	F	F	F	F	F	F	F	F	F	F	F	F
AT1G09440	F	F	F	F	F	F	F	F	F	F	-	F	F	F	F	F	F	F	F	F	-	-	F	F	F	F	F	F	F	F	F	F	F	F	F	F	F	F	F	F	F	F	F
AT1G09450	F	F	F	F	F	F	F	F	F	F	-	F	F	F	F	F	F	F	F	F	-	-	F	F	F	F	F	F	F	F	F	F	F	F	F	F	F	F	F	F	F	F	F
AT1G09460	F	F	F	F	F	F	F	F	F	F	-	F	F	F	F	F	F	F	F	F	-	-	F	F	F	F	F	F	F	F	F	F	F	F	F	F	F	F	F	F	F	F	F
AT1G09470	F	F	F	F	F	F	F	F	F	F	-	F	F	F	F	F	F	F	F	F	-	-	F	F	F	F	F	F	F	F	F	F	F	F	F	F	F	F	F	F	F	F	F
AT1G09480	F	F	F	F	F	F	F	F	F	F	-	F	F	F	F	F	F	F	F	F	-	-	F	F	F	F	F	F	F	F	F	F	F	F	F	F	F	F	F	F	F	F	F
AT1G09483	F	F	F	F	F	F	F	F	F	F	-	F	F	F	F	F	F	F	F	F	-	-	F	F	F	F	F	F	F	F	F	F	F	F	F	F	F	F	F	F	F	F	F
AT1G09486	F	F	F	F	F	F	F	F	F	F	-	F	F	F	F	F	F	F	F	F	-	-	F	F	F	F	F	F	F	F	F	F	F	F	F	F	F	F	F	F	F	F	F
AT1G09490	F	F	F	F	F	F	F	F	F	F	-	F	F	F	F	F	F	F	F	F	-	-	F	F	F	F	F	F	F	F	F	F	F	F	F	F	F	F	F	F	F	F	F
AT1G09500	F	F	F	F	F	F	F	F	F	F	-	F	F	F	F	F	F	F	F	F	-	-	F	F	F	F	F	F	F	F	F	F	F	F	F	F	F	F	F	F	F	F	F
AT1G09510	F	F	F	F	F	F	F	F	F	F	-	F	F	F	F	F	F	F	F	F	-	-	F	F	F	F	F	F	F	F	F	F	F	F	F	F	F	F	F	F	F	F	F
AT1G09520	F	F	F	F	F	F	F	F	F	F	-	F	F	F	F	F	F	F	F	F	-	-	F	F	F	F	F	F	F	F	F	F	F	F	F	F	F	F	F	F	F	F	F
AT1G09530	F	F	F	F	F	F	F	F	F	F	-	F	F	F	F	F	F	F	F	F	-	-	F	F	F	F	F	F	F	F	F	F	F	F	F	F	F	F	F	F	F	F	F
AT1G09540	F	F	F	F	F	F	F	F	F	F	-	F	F	F	F	F	F	F	F	F	-	-	F	F	F	F	F	F	F	F	F	F	F	F	F	F	F	F	F	F	F	F	F
AT1G09550	F	F	F	F	F	F	F	F	F	F	-	F	F	F	F	F	F	F	F	F	-	-	F	F	F	F	F	F	F	F	F	F	F	F	F	F	F	F	F	F	F	F	F
AT1G09560	F	F	F	F	F	F	F	F	F	F	-	F	F	F	F	F	F	F	F	F	-	-	F	F	F	F	F	F	F	F	F	F	F	F	F	F	F	F	F	F	F	F	F
AT1G09570	F	F	F	F	F	F	F	F	F	F	-	F	F	F	F	F	F	F	F	F	-	-	F	F	F	F	F	F	F	F	F	F	F	F	F	F	F	F	F	F	F	F	F
AT1G09575	F	F	F	F	F	F	F	F	F	F	-	F	F	F	F	F	F	F	F	F	-	-	F	F	F	F	F	F	F	F	F	F	F	F	F	F	F	F	F	F	F	F	F
AT1G09580	F	F	F	F	F	F	F	F	F	F	-	F	F	F	F	F	F	F	F	F	-	-	F	F	F	F	F	F	F	F	F	F	F	F	F	F	F	F	F	F	F	F	F
AT1G09590	F	F	F	F	F	F	F	F	F	F	-	F	F	F	F	F	F	F	F	F	-	-	F	F	F	F	F	F	F	F	F	F	F	F	F	F	F	F	F	F	F	F	F
AT1G09600	F	F	F	F	F	F	F	F	F	F	-	F	F	F	F	F	F	F	F	F	-	-	F	F	F	F	F	F	F	F	F	F	F	F	F	F	F	F	F	F	F	F	F
AT1G09610	F	F	F	F	F	F	F	F	F	F	-	F	F	F	F	F	F	F	F	F	-	-	F	F	F	F	F	F	F	F	F	F	F	F	F	F	F	F	F	F	F	F	F
AT1G09620	F	F	F	F	F	F	F	F	F	F	-	F	F	F	F	F	F	F	F	F	-	-	F	F	F	F	F	F	F	F	F	F	F	F	F	F	F	F	F	F	F	F	F
AT1G09625	F	F	F	F	F	F	F	F	F	F	-	F	F	F	F	F	F	F	F	F	-	-	F	F	F	F	F	F	F	F	F	F	F	F	F	F	F	F	F	F	F	F	F
AT1G09630	F	F	F	F	F	F	F	F	F	F	-	F	F	F	F	F	F	F	F	F	-	-	F	F	F	F	F	F	F	F	F	F	F	F	F	F	F	F	F	F	F	F	F
AT1G09640	F	F	F	F	F	F	F	F	F	F	-	F	F	F	F	F	F	F	F	F	-	-	F	F	F	F	F	F	F	F	F	F	F	F	F	F	F	F	F	F	F	F	F
AT1G09645	F	F	F	F	F	F	F	F	F	F	-	F	F	F	F	F	F	F	F	F	-	-	F	F	F	F	F	F	F	F	F	F	F	F	F	F	F	F	F	F	F	F	F
AT1G09650	F	F	F	F	F	F	F	F	F	F	-	F	F	F	F	F	F	F	F	F	-	-	F	F	F	F	F	F	F	F	F	F	F	F	F	F	F	F	F	F	F	F	F
AT1G09660	F	F	F	F	F	F	F	F	F	F	-	F	F	F	F	F	F	F	F	F	-	-	F	F	F	F	F	F	F	F	F	F	F	F	F	F	F	F	F	F	F	F	F
AT1G09665	F	F	F	F	F	F	F	F	F	F	-	F	F	F	F	F	F	F	F	F	-	-	F	F	F	F	F	F	F	F	F	F	F	F	F	F	F	F	F	F	F	F	F
AT1G09680	F	F	F	F	F	F	F	F	F	F	-	F	F	F	F	F	F	F	F	F	-	-	F	F	F	F	F	F	F	F	F	F	F	F	F	F	F	F	F	F	F	F	F
AT1G09690	F	F	F	F	F	F	F	F	F	F	-	F	F	F	F	F	F	F	F	F	-	-	F	F	F	F	F	F	F	F	F	F	F	F	F	F	F	F	F	F	F	F	F
AT1G09700	F	F	F	F	F	F	F	F	F	F	-	F	F	F	F	F	F	F	F	F	-	-	F	F	F	F	F	F	F	F	F	F	F	F	F	F	F	F	F	F	F	F	F
AT1G09710	F	F	F	F	F	F	F	F	F	F	-	F	F	F	F	F	F	F	F	F	-	-	F	F	F	F	F	F	F	F	F	F	F	F	F	F	F	F	F	F	F	F	F
AT1G09720	F	F	F	F	F	F	F	F	F	F	-	F	F	F	F	F	F	F	F	F	-	-	F	F	F	F	F	F	F	F	F	F	F	F	F	F	F	F	F	F	F	F	F
AT1G09730	F	F	F	F	F	F	F	F	F	F	-	F	F	F	F	F	F	F	F	F	-	-	F	F	F	F	F	F	F	F	F	F	F	F	F	F	F	F	F	F	F	F	F
AT1G09740	F	F	F	F	F	F	F	F	F	F	-	F	F	F	F	F	F	F	F	F	-	-	F	F	F	F	F	F	F	F	F	F	F	F	F	F	F	F	F	F	F	F	F
AT1G09750	F	F	F	F	F	F	F	F	F	F	-	F	F	F	F	F	F	F	F	F	-	-	F	F	F	F	F	F	F	F	F	F	F	F	F	F	F	F	F	F	F	F	F
AT1G09760	F	F	F	F	F	F	F	F	F	F	-	F	F	F	F	F	F	F	F	F	-	-	F	F	F	F	F	F	F	F	F	F	F	F	F	F	F	F	F	F	F	F	F
AT1G09770	F	F	F	F	F	F	F	F	F	F	-	F	F	F	F	F	F	F	F	F	-	-	F	F	F	F	F	F	F	F	F	F	F	F	F	F	F	F	F	F	F	F	F
AT1G09780	F	F	F	F	F	F	F	F	F	F	-	F	F	F	F	F	F	F	F	F	-	-	F	F	F	F	F	F	F	F	F	F	F	F	F	F	F	F	F	F	F	F	F
AT1G09790	F	F	F	F	F	F	F	F	F	F	-	F	F	F	F	F	F	F	F	F	-	-	F	F	F	F	F	F	F	F	F	F	F	F	F	F	F	F	F	F	F	F	F
AT1G09795	F	F	F	F	F	F	F	F	F	F	-	F	F	F	F	F	F	F	F	F	-	-	F	F	F	F	F	F	F	F	F	F	F	F	F	F	F	F	F	F	F	F	F
AT1G09800	F	F	F	F	F	F	F	F	F	F	-	F	F	F	F	F	F	F	F	F	-	-	F	F	F	F	F	F	F	F	F	F	F	F	F	F	F	F	F	F	F	F	F
AT1G09810	F	F	F	F	F	F	F	F	F	F	-	F	F	F	F	F	F	F	F	F	-	-	F	F	F	F	F	F	F	F	F	F	F	F	F	F	F	F	F	F	F	F	F
AT1G09812	F	F	F	F	F	F	F	F	F	F	-	F	F	F	F	F	F	F	F	F	-	-	F	F	F	F	F	F	F	F	F	F	F	F	F	F	F	F	F	F	F	F	F
AT1G09815	F	F	F	F	F	F	F	F	F	F	-	F	F	F	F	F	F	F	F	F	-	-	F	F	F	F	F	F	F	F	F	F	F	F	F	F	F	F	F	F	F	F	F
AT1G09820	F	F	F	F	F	F	F	F	F	F	-	F	F	F	F	F	F	F	F	F	-	-	F	F	F	F	F	F	F	F	F	F	F	F	F	F	F	F	F	F	F	F	F
AT1G09830	F	F	F	F	F	F	F	F	F	F	-	F	F	F	F	F	F	F	F	F	-	-	F	F	F	F	F	F	F	F	F	F	F	F	F	F	F	F	F	F	F	F	F
AT1G09840	F	F	F	F	F	F	F	F	F	F	-	F	F	F	F	F	F	F	F	F	-	-	F	F	F	F	F	F	F	F	F	F	F	F	F	F	F	F	F	F	F	F	F
AT1G09850	F	F	F	F	F	F	F	F	F	F	-	F	F	F	F	F	F	F	F	F	-	-	F	F	F	F	F	F	F	F	F	F	F	F	F	F	F	F	F	F	F	F	F
AT1G09860	F	F	F	F	F	F	F	F	F	F	-	F	F	F	F	F	F	F	F	F	-	-	F	F	F	F	F	F	F	F	F	F	F	F	F	F	F	F	F	F	F	F	F
AT1G09870	F	F	F	F	F	F	F	F	F	F	-	F	F	F	F	F	F	F	F	F	-	-	F	F	F	F	F	F	F	F	F	F	F	F	F	F	F	F	F	F	F	F	F
AT1G09880	F	F	F	F	F	F	F	F	F	F	-	F	F	F	F	F	F	F	F	F	-	-	F	F	F	F	F	F	F	F	F	F	F	F	F	F	F	F	F	F	F	F	F
AT1G09890	F	F	F	F	F	F	F	F	F	F	-	F	F	F	F	F	F	F	F	F	-	-	F	F	F	F	F	F	F	F	F	F	F	F	F	F	F	F	F	F	F	F	F
AT1G09900	F	F	F	F	F	F	F	F	F	F	-	F	F	F	F	F	F	F	F	F	-	-	F	F	F	F	F	F	F	F	F	F	F	F	F	F	F	F	F	F	F	F	F
AT1G09910	F	F	F	F	F	F	F	F	F	F	-	F	F	F	F	F	F	F	F	F	-	-	F	F	F	F	F	F	F	F	F	F	F	F	F	F	F	F	F	F	F	F	F
AT1G09920	F	F	F	F	F	F	F	F	F	F	-	F	F	F	F	F	F	F	F	F	-	-	F	F	F	F	F	F	F	F	F	F	F	F	F	F	F	F	F	F	F	F	F
AT1G09930	F	F	F	F	F	F	F	F	F	F	-	F	F	F	F	F	F	F	F	F	-	-	F	F	F	F	F	F	F	F	F	F	F	F	F	F	F	F	F	F	F	F	F
AT1G09932	F	F	F	F	F	F	F	F	F	F	-	F	F	F	F	F	F	F	F	F	-	-	F	F	F	F	F	F	F	F	F	F	F	F	F	F	F	F	F	F	F	F	F
AT1G09935	F	F	F	F	F	F	F	F	F	F	-	F	F	F	F	F	F	F	F	F	-	-	F	F	F	F	F	F	F	F	F	F	F	F	F	F	F	F	F	F	F	F	F
AT1G09940	F	F	F	F	F	F	F	F	F	F	-	F	F	F	F	F	F	F	F	F	-	-	F	F	F	F	F	F	F	F	F	F	F	F	F	F	F	F	F	F	F	F	F
AT1G09950	F	F	F	F	F	F	F	F	F	F	-	F	F	F	F	F	F	F	F	F	-	-	F	F	F	F	F	F	F	F	F	F	F	F	F	F	F	F	F	F	F	F	F
AT1G09960	F	F	F	F	F	F	F	F	F	F	-	F	F	F	F	F	F	F	F	F	-	-	F	F	F	F	F	F	F	F	F	F	F	F	F	F	F	F	F	F	F	F	F
AT1G09970	F	F	F	F	F	F	F	F	F	F	-	F	F	F	F	F	F	F	F	F	-	-	F	F	F	F	F	F	F	F	F	F	F	F	F	F	F	F	F	F	F	F	F
AT1G09980	F	F	F	F	F	F	F	F	F	F	-	F	F	F	F	F	F	F	F	F	-	-	F	F	F	F	F	F	F	F	F	F	F	F	F	F	F	F	F	F	F	F	F
AT1G09995	F	F	F	F	F	F	F	F	F	F	-	F	F	F	F	F	F	F	F	F	-	-	F	F	F	F	F	F	F	F	F	F	F	F	F	F	F	F	F	F	F	F	F
AT1G10000	F	F	F	F	F	F	F	F	F	F	-	F	F	F	F	F	F	F	F	F	-	-	F	F	F	F	F	F	F	F	F	F	F	F	F	F	F	F	F	F	F	F	F
AT1G10010	F	F	F	F	F	F	F	F	F	F	-	F	F	F	F	F	F	F	F	F	-	-	F	F	F	F	F	F	F	F	F	F	F	F	F	F	F	F	F	F	F	F	F
AT1G10020	F	F	F	F	F	F	F	F	F	F	-	F	F	F	F	F	F	F	F	F	-	-	F	F	F	F	F	F	F	F	F	F	F	F	F	F	F	F	F	F	F	F	F
AT1G10030	F	F	F	F	F	F	F	F	F	F	-	F	F	F	F	F	F	F	F	F	-	-	F	F	F	F	F	F	F	F	F	F	F	F	F	F	F	F	F	F	F	F	F
AT1G10040	F	F	F	F	F	F	F	F	F	F	-	F	F	F	F	F	F	F	F	F	-	-	F	F	F	F	F	F	F	F	F	F	F	F	F	F	F	F	F	F	F	F	F
AT1G10050	F	F	F	F	F	F	F	F	F	F	-	F	F	F	F	F	F	F	F	F	-	-	F	F	F	F	F	F	F	F	F	F	F	F	F	F	F	F	F	F	F	F	F
AT1G10060	F	F	F	F	F	F	F	F	F	F	-	F	F	F	F	F	F	F	F	F	-	-	F	F	F	F	F	F	F	F	F	F	F	F	F	F	F	F	F	F	F	F	F
AT1G10070	F	F	F	F	F	F	F	F	F	F	-	F	F	F	F	F	F	F	F	F	-	-	F	F	F	F	F	F	F	F	F	F	F	F	F	F	F	F	F	F	F	F	F
AT1G10090	F	F	F	F	F	F	F	F	F	F	-	F	F	F	F	F	F	F	F	F	-	-	F	F	F	F	F	F	F	F	F	F	F	F	F	F	F	F	F	F	F	F	F
AT1G10095	F	F	F	F	F	F	F	F	F	F	-	F	F	F	F	F	F	F	F	F	-	-	F	F	F	F	F	F	F	F	F	F	F	F	F	F	F	F	F	F	F	F	F
AT1G10100	F	F	F	F	F	F	F	F	F	F	-	F	F	F	F	F	F	F	F	F	-	-	F	F	F	F	F	F	F	F	F	F	F	F	F	F	F	F	F	F	F	F	F
AT1G10110	F	F	F	F	F	F	F	F	F	F	-	F	F	F	F	F	F	F	F	F	-	-	F	F	F	F	F	F	F	F	F	F	F	F	F	F	F	F	F	F	F	F	F
AT1G10120	F	F	F	F	F	F	F	F	F	F	-	F	F	F	F	F	F	F	F	F	-	-	F	F	F	F	F	F	F	F	F	F	F	F	F	F	F	F	F	F	F	F	F
AT1G10130	F	F	F	F	F	F	F	F	F	F	-	F	F	F	F	F	F	F	F	F	-	-	F	F	F	F	F	F	F	F	F	F	F	F	F	F	F	F	F	F	F	F	F
AT1G10140	F	F	F	F	F	F	F	F	F	F	-	F	F	F	F	F	F	F	F	F	-	-	F	F	F	F	F	F	F	F	F	F	F	F	F	F	F	F	F	F	F	F	F
AT1G10150	F	F	F	F	F	F	F	F	F	F	-	F	F	F	F	F	F	F	F	F	-	-	F	F	F	F	F	F	F	F	F	F	F	F	F	F	F	F	F	F	F	F	F
AT1G10155	F	F	F	F	F	F	F	F	F	F	-	F	F	F	F	F	F	F	F	F	-	-	F	F	F	F	F	F	F	F	F	F	F	F	F	F	F	F	F	F	F	F	F
AT1G10160	F	F	F	F	F	F	F	F	F	F	-	F	F	F	F	F	F	F	F	F	-	-	F	F	F	F	F	F	F	F	F	F	F	F	F	F	F	F	F	F	F	F	F
AT1G10170	F	F	F	F	F	F	F	F	F	F	-	F	F	F	F	F	F	F	F	F	T	-	F	F	F	F	F	F	F	F	F	F	F	F	F	F	F	F	F	F	F	F	F
AT1G10180	F	F	F	F	F	F	F	F	F	F	-	F	F	F	F	F	F	F	F	F	-	-	F	F	F	F	F	F	F	F	F	F	F	F	F	F	F	F	F	F	F	F	F
AT1G10190	F	F	F	F	F	F	F	F	F	F	-	F	F	F	F	F	F	F	F	F	-	-	F	F	F	F	F	F	F	F	F	F	F	F	F	F	F	F	F	F	F	F	F
AT1G10200	F	F	F	F	F	F	F	F	F	F	-	F	F	F	F	F	F	F	F	F	-	-	F	F	F	F	F	F	F	F	F	F	F	F	F	F	F	F	F	F	F	F	F
AT1G10210	F	F	T	F	F	F	F	F	F	F	-	F	F	F	F	F	F	F	F	F	-	T	F	F	F	F	F	F	F	F	F	F	F	F	F	F	F	F	F	F	F	F	F
AT1G10220	F	F	F	F	F	F	F	F	F	F	-	F	F	F	F	F	F	F	F	F	-	-	F	F	F	F	F	F	F	F	F	F	F	F	F	F	F	F	F	F	F	F	F
AT1G10230	F	F	F	F	F	F	F	F	F	F	-	F	F	F	F	F	F	F	F	F	-	-	F	F	F	F	F	F	F	F	F	F	F	F	F	F	F	F	F	F	F	F	F
AT1G10240	F	F	F	F	F	F	F	F	F	F	-	F	F	F	F	F	F	F	F	F	-	-	F	F	F	F	F	F	F	F	F	F	F	F	F	F	F	F	F	F	F	F	F
AT1G10250	F	F	F	F	F	F	F	F	F	F	-	F	F	F	F	F	F	F	F	F	-	-	F	F	F	F	F	F	F	F	F	F	F	F	F	F	F	F	F	F	F	F	F
AT1G10260	F	F	F	F	F	F	F	F	F	F	-	F	F	F	F	F	F	F	F	F	-	-	F	F	F	F	F	F	F	F	F	F	F	F	F	F	F	F	F	F	F	F	F
AT1G10270	F	F	F	F	F	F	F	F	F	F	-	F	F	F	F	F	F	F	F	F	-	-	F	F	F	F	F	F	F	F	F	F	F	F	F	F	F	F	F	F	F	F	F
AT1G10280	F	F	F	F	F	F	F	F	F	F	-	F	F	F	F	F	F	F	F	F	-	-	F	F	F	F	F	F	F	F	F	F	F	F	F	F	F	F	F	F	F	F	F
AT1G10290	F	F	F	F	F	F	F	F	F	F	-	F	F	F	F	F	F	F	F	F	-	-	F	F	F	F	F	F	F	F	F	F	F	F	F	F	F	F	F	F	F	F	F
AT1G10300	F	F	F	F	F	F	F	F	F	F	-	F	F	F	F	F	F	F	F	F	-	-	F	F	F	F	F	F	F	F	F	F	F	F	F	F	F	F	F	F	F	F	F
AT1G10310	F	F	F	F	F	F	F	F	F	F	-	F	F	F	F	F	F	F	F	F	-	-	F	F	F	F	F	F	F	F	F	F	F	F	F	F	F	F	F	F	F	F	F
AT1G10320	F	F	F	F	F	F	F	F	F	F	-	F	F	F	F	F	F	F	F	F	-	-	F	F	F	F	F	F	F	F	F	F	F	F	F	F	F	F	F	F	F	F	F
AT1G10330	F	F	F	F	F	F	F	F	F	F	-	F	F	F	F	F	F	F	F	F	-	-	F	F	F	F	F	F	F	F	F	F	F	F	F	F	F	F	F	F	F	F	F
AT1G10340	F	F	F	F	F	F	F	F	F	F	-	F	F	F	F	F	F	F	F	F	-	-	F	F	F	F	F	F	F	F	F	F	F	F	F	F	F	F	F	F	F	F	F
AT1G10350	F	F	T	F	F	F	F	F	F	F	-	F	F	F	F	F	F	F	F	F	-	-	F	F	F	F	F	F	F	F	F	F	F	F	F	F	F	F	F	F	F	F	F
AT1G10360	F	F	T	F	F	F	F	F	F	F	-	F	F	F	F	F	F	F	F	F	-	-	F	F	F	F	F	F	F	F	F	F	F	F	F	F	F	F	F	F	F	F	F
AT1G10370	F	F	F	F	F	F	F	F	F	F	-	F	F	F	F	F	F	F	F	F	-	-	F	F	F	F	F	F	F	F	F	F	F	F	F	F	F	F	F	F	F	F	F
AT1G10380	F	F	T	F	F	F	F	F	F	F	-	F	F	F	F	F	F	F	F	F	-	-	F	F	F	F	F	F	F	F	F	F	F	F	F	F	F	F	F	F	F	F	F
AT1G10385	F	F	F	F	F	F	F	F	F	F	-	F	F	F	F	F	F	F	F	F	-	-	F	F	F	F	F	F	F	F	F	F	F	F	F	F	F	F	F	F	F	F	F
AT1G10390	F	F	F	F	F	F	F	F	F	F	-	F	F	F	F	F	F	F	F	F	-	-	F	F	F	F	F	F	F	F	F	F	F	F	F	F	F	F	F	F	F	F	F
AT1G10400	F	F	F	F	F	F	F	F	F	F	-	F	F	F	F	F	F	F	F	F	-	-	F	F	F	F	F	F	F	F	F	F	F	F	F	F	F	F	F	F	F	F	F
AT1G10410	F	F	F	F	F	F	F	F	F	F	-	F	F	F	F	F	F	F	F	F	-	-	F	F	F	F	F	F	F	F	F	F	F	F	F	F	F	F	F	F	F	F	F
AT1G10417	F	F	F	F	F	F	F	F	F	F	-	F	F	F	F	F	F	F	F	F	-	-	F	F	F	F	F	F	F	F	F	F	F	F	F	F	F	F	F	F	F	F	F
AT1G10420	F	F	F	F	F	F	F	F	F	F	-	F	F	F	F	F	F	F	F	F	-	-	F	F	F	F	F	F	F	F	F	F	F	F	F	F	F	F	F	F	F	F	F
AT1G10430	F	F	F	F	F	F	F	F	F	F	-	F	F	F	F	F	F	F	F	F	-	-	F	F	F	F	F	F	F	F	F	F	F	F	F	F	F	F	F	F	F	F	F
AT1G10440	F	F	F	F	F	F	F	F	F	F	-	F	F	F	F	F	F	F	F	F	-	-	F	F	F	F	F	F	F	F	F	F	F	F	F	F	F	F	F	F	F	F	F
AT1G10450	F	F	F	F	F	F	F	F	F	F	-	F	F	F	F	F	F	F	F	F	-	-	F	F	F	F	F	F	F	F	F	F	F	F	F	F	F	F	F	F	F	F	F
AT1G10455	F	F	F	F	F	F	F	F	F	F	-	F	F	F	F	F	F	F	F	F	-	-	F	F	F	F	F	F	F	F	F	F	F	F	F	F	F	F	F	F	F	F	F
AT1G10460	F	F	F	F	F	F	F	F	F	F	-	F	F	F	F	F	F	F	F	F	-	-	F	F	F	F	F	F	F	F	F	F	F	F	F	F	F	F	F	F	F	F	F
AT1G10470	F	F	F	F	F	F	F	F	F	F	-	F	F	F	F	F	F	F	F	F	-	-	F	F	F	F	F	F	F	F	F	F	F	F	F	F	F	F	F	F	F	F	F
AT1G10480	F	F	F	F	F	F	F	F	F	F	-	F	F	F	F	F	F	F	F	F	-	-	F	F	F	F	F	F	F	F	F	F	F	F	F	F	F	F	F	F	F	F	F
AT1G10490	F	F	F	F	F	F	F	F	F	F	-	F	F	F	F	F	F	F	F	F	-	-	F	F	F	F	F	F	F	F	F	F	F	F	F	F	F	F	F	F	F	F	F
AT1G10500	F	F	F	F	F	F	F	F	F	F	-	F	F	F	F	F	F	F	F	F	-	-	F	F	F	F	F	F	F	F	F	F	F	F	F	F	F	F	F	F	F	F	F
AT1G10510	F	F	F	F	F	F	F	F	F	F	-	F	F	F	F	F	F	F	F	F	-	-	F	F	F	F	F	F	F	F	F	F	F	F	F	F	F	F	F	F	F	F	F
AT1G10520	F	F	F	F	F	F	F	F	F	F	-	F	F	F	F	F	F	F	F	F	-	-	F	F	F	F	F	F	F	F	F	F	F	F	F	F	F	F	F	F	F	F	F
AT1G10522	F	F	F	F	F	F	F	F	F	F	-	F	F	F	F	F	F	F	F	F	-	-	F	F	F	F	F	F	F	F	F	F	F	F	F	F	F	F	F	F	F	F	F
AT1G10530	F	F	F	F	F	F	F	F	F	F	-	F	F	F	F	F	F	F	F	F	-	-	F	F	F	F	F	F	F	F	F	F	F	F	F	F	F	F	F	F	F	F	F
AT1G10538	F	F	F	F	F	F	F	F	F	F	-	F	F	F	F	F	F	F	F	F	-	-	F	F	F	F	F	F	F	F	F	F	F	F	F	F	F	F	F	F	F	F	F
AT1G10540	F	F	F	F	F	F	F	F	F	F	-	F	F	F	F	F	F	F	F	F	-	-	F	F	F	F	F	F	F	F	F	F	F	F	F	F	F	F	F	F	F	F	F
AT1G10550	F	F	F	F	F	F	F	F	F	F	-	F	F	F	F	F	F	F	F	F	-	-	F	F	F	F	F	F	F	F	F	F	F	F	F	F	F	F	F	F	F	F	F
AT1G10560	F	F	F	F	F	F	F	F	F	F	-	F	F	F	F	F	F	F	F	F	-	-	F	F	F	F	F	F	F	F	F	F	F	F	F	F	F	F	F	F	F	F	F
AT1G10570	F	F	F	F	F	F	F	F	F	F	-	F	F	F	F	F	F	F	F	F	-	-	F	F	F	F	F	F	F	F	F	F	F	F	F	F	F	F	F	F	F	F	F
AT1G10580	F	F	F	F	F	F	F	F	F	F	-	F	F	F	F	F	F	F	F	F	-	-	F	F	F	F	F	F	F	F	F	F	F	F	F	F	F	F	F	F	F	F	F
AT1G10585	F	F	F	F	F	F	F	F	F	F	-	F	F	F	F	F	F	F	F	F	-	-	F	F	F	F	F	F	F	F	F	F	F	F	F	F	F	F	F	F	F	F	F
AT1G10586	F	F	F	F	F	F	F	F	F	F	-	F	F	F	F	F	F	F	F	F	-	-	F	F	F	F	F	F	F	F	F	F	F	F	F	F	F	F	F	F	F	F	F
AT1G10588	F	F	F	F	F	F	F	F	F	F	-	F	F	F	F	F	F	F	F	F	-	-	F	F	F	F	F	F	F	F	F	F	F	F	F	F	F	F	F	F	F	F	F
AT1G10590	F	F	F	F	F	F	F	F	F	F	-	F	F	F	F	F	F	F	F	F	-	-	F	F	F	F	F	F	F	F	F	F	F	F	F	F	F	F	F	F	F	F	F
AT1G10600	F	F	F	F	F	F	F	F	F	F	-	F	F	F	F	F	F	F	F	F	-	-	F	F	F	F	F	F	F	F	F	F	F	F	F	F	F	F	F	F	F	F	F
AT1G10610	F	F	F	F	F	F	F	F	F	F	-	F	F	F	F	F	F	F	F	F	-	-	F	F	F	F	F	F	F	F	F	F	F	F	F	F	F	F	F	F	F	F	F
AT1G10620	F	F	F	F	F	F	F	F	F	F	-	F	F	F	F	F	F	F	F	F	-	-	F	F	F	F	F	F	F	F	F	F	F	F	F	F	F	F	F	F	F	F	F
AT1G10630	F	F	F	F	F	F	F	F	F	F	-	F	F	F	F	F	F	F	F	F	-	-	F	F	F	F	F	F	F	F	F	F	F	F	F	F	F	F	F	F	F	F	F
AT1G10640	F	F	F	F	F	F	F	F	F	F	-	F	F	F	F	F	F	F	F	F	-	-	F	F	F	F	F	F	F	F	F	F	F	F	F	F	F	F	F	F	F	F	F
AT1G10650	F	F	F	F	F	F	F	F	F	F	-	F	F	F	F	F	F	F	F	F	-	-	F	F	F	F	F	F	F	F	F	F	F	F	F	F	F	F	F	F	F	F	F
AT1G10652	F	F	F	F	F	F	F	F	F	F	-	F	F	F	F	F	F	F	F	F	-	-	F	F	F	F	F	F	F	F	F	F	F	F	F	F	F	F	F	F	F	F	F
AT1G10657	F	F	F	F	F	F	F	F	F	F	-	F	F	F	F	F	F	F	F	F	-	-	F	F	F	F	F	F	F	F	F	F	F	F	F	F	F	F	F	F	F	F	F
AT1G10660	F	F	F	F	F	F	F	F	F	F	-	F	F	F	F	F	F	F	F	F	-	-	F	F	F	F	F	F	F	F	F	F	F	F	F	F	F	F	F	F	F	F	F
AT1G10670	F	F	F	F	F	F	F	F	F	F	-	F	F	F	F	F	F	F	F	F	-	-	F	F	F	F	F	F	F	F	F	F	F	F	F	F	F	F	F	F	F	F	F
AT1G10680	F	F	F	F	F	F	F	F	F	F	-	F	F	F	F	F	F	F	F	F	-	-	F	F	F	F	F	F	F	F	F	F	F	F	F	F	F	F	F	F	F	F	F
AT1G10682	F	F	F	F	F	F	F	F	F	F	-	F	F	F	F	F	F	F	F	F	-	-	F	F	F	F	F	F	F	F	F	F	F	F	F	F	F	F	F	F	F	F	F
AT1G10690	F	F	F	F	F	F	F	F	F	F	-	F	F	F	F	F	F	F	F	F	-	-	F	F	F	F	F	F	F	F	F	F	F	F	F	F	F	F	F	F	F	F	F
AT1G10700	F	F	F	F	F	F	F	F	F	F	-	F	F	F	F	F	F	F	F	F	-	-	F	F	F	F	F	F	F	F	F	F	F	F	F	F	F	F	F	F	F	F	F
AT1G10705	F	F	F	F	F	F	F	F	F	F	-	F	F	F	F	F	F	F	F	F	-	-	F	F	F	F	F	F	F	F	F	F	F	F	F	F	F	F	F	F	F	F	F
AT1G10710	F	F	F	F	F	F	F	F	F	F	-	F	F	F	F	F	F	F	F	F	-	-	F	F	F	F	F	F	F	F	F	F	F	F	F	F	F	F	F	F	F	F	F
AT1G10717	F	F	F	F	F	F	F	F	F	F	-	F	F	F	F	F	F	F	F	F	-	-	F	F	F	F	F	F	F	F	F	F	F	F	F	F	F	F	F	F	F	F	F
AT1G10720	F	F	F	F	F	F	F	F	F	F	-	F	F	F	F	F	F	F	F	F	-	-	F	F	F	F	F	F	F	F	F	F	F	F	F	F	F	F	F	F	F	F	F
AT1G10730	F	F	F	F	F	F	F	F	F	F	-	F	F	F	F	F	F	F	F	F	-	-	F	F	F	F	F	F	F	F	F	F	F	F	F	F	F	F	F	F	F	F	F
AT1G10740	F	F	F	F	F	F	F	F	F	F	-	F	F	F	F	F	F	F	F	F	-	-	F	F	F	F	F	F	F	F	F	F	F	F	F	F	F	F	F	F	F	F	F
AT1G10745	F	F	F	F	F	F	F	F	F	F	-	F	F	F	F	F	F	F	F	F	-	-	F	F	F	F	F	F	F	F	F	F	F	F	F	F	F	F	F	F	F	F	F
AT1G10747	F	F	F	F	F	F	F	F	F	F	-	F	F	F	F	F	F	F	F	F	-	-	F	F	F	F	F	F	F	F	F	F	F	F	F	F	F	F	F	F	F	F	F
AT1G10750	F	F	F	F	F	F	F	F	F	F	-	F	F	F	F	F	F	F	F	F	-	-	F	F	F	F	F	F	F	F	F	F	F	F	F	F	F	F	F	F	F	F	F
AT1G10760	F	F	F	F	F	F	F	F	F	F	-	F	F	F	F	F	F	F	F	F	-	-	F	F	F	F	F	F	F	F	F	F	F	F	F	F	F	F	F	F	F	F	F
AT1G10770	F	F	F	F	F	F	F	F	F	F	-	F	F	F	F	F	F	F	F	F	-	-	F	F	F	F	F	F	F	F	F	F	F	F	F	F	F	F	F	F	F	F	F
AT1G10780	F	F	F	F	F	F	F	F	F	F	-	F	F	F	F	F	F	F	F	F	-	-	F	F	F	F	F	F	F	F	F	F	F	F	F	F	F	F	F	F	F	F	F
AT1G10790	F	F	F	F	F	F	F	F	F	F	-	F	F	F	F	F	F	F	F	F	-	-	F	F	F	F	F	F	F	F	F	F	F	F	F	F	F	F	F	F	F	F	F
AT1G10800	F	F	F	F	F	F	F	F	F	F	-	F	F	F	F	F	F	F	F	F	-	-	F	F	F	F	F	F	F	F	F	F	F	F	F	F	F	F	F	F	F	F	F
AT1G10810	F	T	F	F	F	F	F	F	F	F	-	F	F	F	F	F	F	F	F	F	-	-	F	F	F	F	F	F	F	F	T	F	F	F	F	F	F	F	F	F	F	F	F
AT1G10820	F	T	F	F	F	F	F	F	F	F	-	F	F	F	F	F	F	F	F	F	-	-	F	F	F	F	F	F	F	F	T	F	F	F	F	F	F	F	F	F	F	F	F
AT1G10830	F	F	F	F	F	F	F	F	F	F	-	F	F	F	F	F	F	F	F	F	-	-	F	F	F	F	F	F	F	F	F	F	F	F	F	F	F	F	F	F	F	F	F
AT1G10840	F	F	F	F	F	F	F	F	F	F	-	F	F	F	F	F	F	F	F	F	-	-	F	F	F	F	F	F	F	F	F	F	F	F	F	F	F	F	F	F	F	F	F
AT1G10850	F	F	F	F	F	F	F	F	F	F	-	F	F	F	F	F	F	F	F	F	-	-	F	F	F	F	F	F	F	F	F	F	F	F	F	F	F	F	F	F	F	F	F
AT1G10865	F	F	F	F	F	F	F	F	F	F	-	F	F	F	F	F	F	F	F	F	-	-	F	F	F	F	F	F	F	F	F	F	F	F	F	F	F	F	F	F	F	F	F
AT1G10870	F	F	F	F	F	F	F	F	F	F	-	F	F	F	F	F	F	F	F	F	-	-	F	F	F	F	F	F	F	F	F	F	F	F	F	F	F	F	F	F	F	F	F
AT1G10880	F	F	F	F	F	F	F	F	F	F	-	F	F	F	F	F	F	F	F	F	-	-	F	F	F	F	F	F	F	F	F	F	F	F	F	F	F	F	F	F	F	F	F
AT1G10890	F	F	F	F	F	F	F	F	F	F	-	F	F	F	F	F	F	F	F	F	-	-	F	F	F	F	F	F	F	F	F	F	F	F	F	F	F	F	F	F	F	F	F
AT1G10900	F	F	F	F	F	F	F	F	F	F	-	F	F	F	F	F	F	F	F	F	-	-	F	F	F	F	F	F	F	F	F	F	F	F	F	F	F	F	F	F	F	F	F
AT1G10910	F	F	F	F	F	F	F	F	F	F	-	F	F	F	F	F	F	F	F	F	-	-	F	F	F	F	F	F	F	F	F	F	F	F	F	F	F	F	F	F	F	F	F
AT1G10920	F	F	F	F	F	F	F	F	F	F	-	F	F	F	F	F	F	F	F	F	-	-	F	F	F	F	F	F	F	F	F	F	F	F	F	F	F	F	F	F	F	F	F
AT1G10930	F	F	F	F	F	F	F	F	F	F	-	F	F	F	F	F	F	F	F	F	-	-	F	F	F	F	F	F	F	F	F	F	F	F	F	F	F	F	F	F	F	F	F
AT1G10940	F	F	F	F	F	F	F	F	F	F	-	F	F	F	F	F	F	F	F	F	-	-	F	F	F	F	F	F	F	F	F	F	F	F	F	F	F	F	F	F	F	F	F
AT1G10950	F	F	F	F	F	F	F	F	F	F	-	F	F	F	F	F	F	F	F	F	-	-	F	F	F	F	F	F	F	F	F	F	F	F	F	F	F	F	F	F	F	F	F
AT1G10960	F	F	F	F	F	F	F	F	F	F	-	F	F	F	F	F	F	F	F	F	-	-	F	F	F	F	F	F	F	F	F	F	F	F	F	F	F	F	F	F	F	F	F
AT1G10970	F	F	F	F	F	F	F	F	F	F	-	F	F	F	F	F	F	F	F	F	-	-	F	F	F	F	F	F	F	F	F	F	F	F	F	F	F	F	F	F	F	F	F
AT1G10980	F	F	F	F	F	F	F	F	F	F	-	F	F	F	F	F	F	F	F	F	-	-	F	F	F	F	F	F	F	F	F	F	F	F	F	F	F	F	F	F	F	F	F
AT1G10990	F	F	F	F	F	F	F	F	F	F	-	F	F	F	F	F	F	F	F	F	-	-	F	F	F	F	F	F	F	F	F	F	F	F	F	F	F	F	F	F	F	F	F
AT1G11000	F	F	F	F	F	F	F	F	F	F	-	F	F	F	F	F	F	F	F	F	-	-	F	F	F	F	F	F	F	F	F	F	F	F	F	F	F	F	F	F	F	F	F
AT1G11010	F	F	F	F	F	F	F	F	F	F	-	F	F	F	F	F	F	F	F	F	-	-	F	F	F	F	F	F	F	F	F	F	F	F	F	F	F	F	F	F	F	F	F
AT1G11020	F	F	F	F	F	F	F	F	F	F	-	F	F	F	F	F	F	F	F	F	-	-	F	F	F	F	F	F	F	F	F	F	F	F	F	F	F	F	F	F	F	F	F
AT1G11030	F	F	F	F	F	F	F	F	F	F	-	F	F	F	F	F	F	F	F	F	-	-	F	F	F	F	F	F	F	F	F	F	F	F	F	F	F	F	F	F	F	F	F
AT1G11040	F	F	F	F	F	F	F	F	F	F	-	F	F	F	F	F	F	F	F	F	-	-	F	F	F	F	F	F	F	F	F	F	F	F	F	F	F	F	F	F	F	F	F
AT1G11050	F	F	F	F	F	F	F	F	F	F	-	F	F	F	F	F	F	F	F	F	-	-	F	F	F	F	F	F	F	F	F	F	F	F	F	F	F	F	F	F	F	F	F
AT1G11055	F	F	F	F	F	F	F	F	F	F	-	F	F	F	F	F	F	F	F	F	-	-	F	F	F	F	F	F	F	F	F	F	F	F	F	F	F	F	F	F	F	F	F
AT1G11060	F	F	F	F	F	F	F	F	F	F	-	F	F	F	F	F	F	F	F	F	-	-	F	F	F	F	F	F	F	F	F	F	F	F	F	F	F	F	F	T	F	F	F
AT1G11070	F	F	F	F	F	F	F	F	F	F	-	F	F	F	F	F	F	F	F	F	-	-	F	F	F	F	F	F	F	F	F	F	F	F	F	F	F	F	F	F	F	F	F
AT1G11090	F	F	F	F	F	F	F	F	F	F	-	F	F	F	F	F	F	F	F	F	-	-	F	F	F	F	F	F	F	F	F	F	F	F	F	F	F	F	F	F	F	F	F
AT1G11100	F	F	F	F	F	F	F	F	F	F	-	F	F	F	F	F	F	F	F	F	-	-	F	F	F	F	F	F	F	F	F	F	F	F	F	F	F	F	F	F	F	F	F
AT1G11110	F	F	F	F	F	F	F	F	F	F	-	F	F	F	F	F	F	F	F	F	-	-	F	F	F	F	F	F	F	F	F	F	F	F	F	F	F	F	F	F	F	F	F
AT1G11112	F	F	F	F	F	F	F	F	F	F	-	F	F	F	F	F	F	F	F	F	-	-	F	F	F	F	F	F	F	F	F	F	F	F	F	F	F	F	F	F	F	F	F
AT1G11120	F	F	F	F	F	F	F	F	F	F	-	F	F	F	F	F	F	F	F	F	-	-	F	F	F	F	F	F	F	F	F	F	F	F	F	F	F	F	F	F	F	F	F
AT1G11130	F	F	F	F	F	F	F	F	F	F	-	F	F	F	F	F	F	F	F	F	-	-	F	F	F	F	F	F	F	F	F	F	F	F	F	F	F	F	F	F	F	F	F
AT1G11145	F	F	F	F	F	F	F	F	F	F	-	F	F	F	F	F	F	F	F	F	-	-	F	F	F	F	F	F	F	F	F	F	F	F	F	F	F	F	F	F	F	F	F
AT1G11150	F	F	F	F	F	F	F	F	F	F	-	F	F	F	F	F	F	F	F	F	-	-	F	F	F	F	F	F	F	F	F	F	F	F	F	F	F	F	F	F	F	F	F
AT1G11160	F	F	F	F	F	F	F	F	F	F	-	F	F	F	F	F	F	F	F	F	-	-	F	F	F	F	F	F	F	F	F	F	F	F	F	F	F	F	F	F	F	F	F
AT1G11170	F	F	F	F	F	F	F	F	F	F	-	F	F	F	F	F	F	F	F	F	-	-	F	F	F	F	F	F	F	F	F	F	F	F	F	F	F	F	F	F	F	F	F
AT1G11175	F	F	F	F	F	F	F	F	F	F	-	F	F	F	F	F	F	F	F	F	-	-	F	F	F	F	F	F	F	F	F	F	F	F	F	F	F	F	F	F	F	F	F
AT1G11180	F	F	F	F	F	F	F	F	F	F	-	F	F	F	F	F	F	F	F	F	-	-	F	F	F	F	F	F	F	F	F	F	F	F	F	F	F	F	F	F	F	F	F
AT1G11185	F	F	F	F	F	F	F	F	F	F	-	F	F	F	F	F	F	F	F	F	-	-	F	F	F	F	F	F	F	F	F	F	F	F	F	F	F	F	F	F	F	F	F
AT1G11190	F	F	F	F	F	F	F	F	F	F	-	F	F	F	F	F	F	F	F	F	-	-	F	F	F	F	F	F	F	F	F	F	F	F	F	F	F	F	F	F	F	F	F
AT1G11200	F	F	F	F	F	F	F	F	F	F	-	F	F	F	F	F	F	F	F	F	-	-	F	F	F	F	F	F	F	F	F	F	F	F	F	F	F	F	F	F	F	F	F
AT1G11210	F	F	F	F	F	F	F	F	F	F	-	F	F	F	F	F	F	F	F	F	-	-	F	F	F	F	F	F	F	F	F	F	F	F	F	F	F	F	F	F	F	F	F
AT1G11220	F	F	F	F	F	F	F	F	F	F	-	F	F	F	F	F	F	F	F	F	-	-	F	F	F	F	F	F	F	F	F	F	F	F	F	F	F	F	F	F	F	F	F
AT1G11230	F	F	F	F	F	F	F	F	F	F	-	F	F	F	F	F	F	F	F	F	-	-	F	F	F	F	F	F	F	F	F	F	F	F	F	F	F	F	F	F	F	F	F
AT1G11240	F	F	F	F	F	F	F	F	F	F	-	F	F	F	F	F	F	F	F	F	-	-	F	F	F	F	F	F	F	F	F	F	F	F	F	F	F	F	F	F	F	F	F
AT1G11250	F	F	F	F	F	F	F	F	F	F	-	F	F	F	F	F	F	F	F	F	-	-	F	F	F	F	F	F	F	F	F	F	F	F	F	F	F	F	F	F	F	F	F
AT1G11260	F	F	F	F	F	F	F	F	F	F	-	F	F	F	F	F	F	F	F	F	-	-	F	F	F	F	F	F	F	F	F	F	F	F	F	F	F	F	F	F	F	F	F
AT1G11265	F	F	F	F	F	F	F	F	F	F	-	F	F	F	F	F	F	F	F	F	-	-	F	F	F	F	F	F	F	F	F	F	F	F	F	F	F	F	F	F	F	F	F
AT1G11270	F	F	F	F	F	F	F	F	F	F	-	F	F	F	F	F	F	F	F	F	-	-	F	F	F	F	F	F	F	F	F	F	F	F	F	F	F	F	F	F	F	F	F
AT1G11280	F	F	F	F	F	F	F	F	F	F	-	F	F	F	F	F	F	F	F	F	-	-	F	F	F	F	F	F	F	F	F	F	F	F	F	F	F	F	F	F	F	F	F
AT1G11290	F	F	F	F	F	F	F	F	F	F	-	F	F	F	F	F	F	F	F	F	-	-	F	F	F	F	F	F	F	F	F	F	F	F	F	F	F	F	F	F	F	F	F
AT1G11300	F	F	F	F	F	F	F	F	F	F	-	F	F	F	F	F	F	F	F	F	-	-	F	F	F	F	F	F	F	F	F	F	F	F	F	F	F	F	F	F	F	F	F
AT1G11310	F	F	F	F	F	F	F	F	F	F	-	F	F	F	F	F	F	F	F	F	-	-	F	F	F	F	F	F	F	F	F	F	F	F	F	F	F	F	F	F	F	F	F
AT1G11320	F	F	F	F	F	F	F	F	F	F	-	F	F	F	F	F	F	F	F	F	-	-	F	F	F	F	F	F	F	F	F	F	F	F	F	F	F	F	F	F	F	F	F
AT1G11330	F	F	F	F	F	F	F	F	F	F	-	F	F	F	F	F	F	F	F	F	-	-	F	F	F	F	F	F	F	F	F	F	F	F	F	F	F	F	F	F	F	F	F
AT1G11340	F	F	F	F	F	F	F	F	F	F	-	F	F	F	F	F	F	F	F	F	-	-	F	F	F	F	F	F	F	F	F	F	F	F	F	F	F	F	F	F	F	F	F
AT1G11350	F	F	F	F	F	F	F	F	F	F	-	F	F	F	F	F	F	F	F	F	-	-	F	F	F	F	F	F	F	F	F	F	F	F	F	F	F	F	F	F	F	F	F
AT1G11360	F	F	F	F	F	F	F	F	F	F	-	F	F	F	F	F	F	F	F	F	-	-	F	F	F	F	F	F	F	F	F	F	F	F	F	F	F	F	F	F	F	F	F
AT1G11362	F	F	F	F	F	F	F	F	F	F	-	F	F	F	F	F	F	F	F	F	-	-	F	F	F	F	F	F	F	F	F	F	F	F	F	F	F	F	F	F	F	F	F
AT1G11370	F	F	F	F	F	F	F	F	F	F	-	F	F	F	F	F	F	F	F	F	-	-	F	F	F	F	F	F	F	F	F	F	F	F	F	F	F	F	F	F	F	F	F
AT1G11380	F	F	F	F	F	F	F	F	F	F	-	F	F	F	F	F	F	F	F	F	-	-	F	F	F	F	F	F	F	F	F	F	F	F	F	F	F	F	F	F	F	F	F
AT1G11390	F	F	F	F	F	F	F	F	F	F	-	F	F	F	F	F	F	F	F	F	-	-	F	F	F	F	F	F	F	F	F	F	F	F	F	F	F	F	F	F	F	F	F
AT1G11400	F	F	F	F	F	F	F	F	F	F	-	F	F	F	F	F	F	F	F	F	-	-	F	F	F	F	F	F	F	F	F	F	F	F	F	F	F	F	F	F	F	F	F
AT1G11410	F	F	F	F	F	F	F	F	F	F	-	F	F	F	F	F	F	F	F	F	-	-	F	F	F	F	F	F	F	T	F	F	F	F	F	F	F	F	F	F	F	F	F
AT1G11420	F	F	F	F	F	F	F	F	F	F	-	F	F	F	F	F	F	F	F	F	-	-	F	F	F	F	F	F	F	F	F	F	F	F	F	F	F	F	F	F	F	F	F
AT1G11430	F	F	F	F	F	F	F	F	F	F	-	F	F	F	F	F	F	F	F	F	-	-	F	F	F	F	F	F	F	F	F	F	F	F	F	F	F	F	F	F	F	F	F
AT1G11440	F	F	F	F	F	F	F	F	F	F	-	F	F	F	F	F	F	F	F	F	-	-	F	F	F	F	F	F	F	F	F	F	F	F	F	F	F	F	F	F	F	F	F
AT1G11450	F	F	F	F	F	F	F	F	F	F	-	F	F	F	F	F	F	F	F	F	-	-	F	F	F	F	F	F	F	F	F	F	F	F	F	F	F	F	F	F	F	F	F
AT1G11460	F	F	F	F	F	F	F	F	F	F	-	F	F	F	F	F	F	F	F	F	-	-	F	F	F	F	F	F	F	F	F	F	F	F	F	F	F	F	F	F	F	F	F
AT1G11470	F	F	F	F	F	F	F	F	F	F	-	F	F	F	F	F	F	F	F	F	-	-	F	F	F	F	F	F	F	T	F	F	F	F	F	F	F	F	F	F	F	F	F
AT1G11475	F	F	F	F	F	F	F	F	F	F	-	F	F	F	F	F	F	F	F	F	-	-	F	F	F	F	F	F	F	F	F	F	F	F	F	F	F	F	F	F	F	F	F
AT1G11480	F	F	F	F	F	F	F	F	F	F	-	F	F	F	F	F	F	F	F	F	-	-	F	F	F	F	F	F	F	F	F	F	F	F	F	F	F	F	F	F	F	F	F
AT1G11482	F	F	F	F	F	F	F	F	F	F	-	F	F	F	F	F	F	F	F	F	-	-	F	F	F	F	F	F	F	F	F	F	F	F	F	F	F	F	F	F	F	F	F
AT1G11490	F	F	F	F	F	F	F	F	F	F	-	F	F	F	F	F	F	F	F	F	-	-	F	F	F	F	F	F	F	F	F	F	F	F	F	F	F	F	F	F	F	F	F
AT1G11500	F	F	F	F	F	F	T	F	F	F	-	F	F	F	F	F	F	F	F	F	-	-	T	F	F	F	F	F	F	F	F	F	F	F	F	F	F	F	F	F	F	F	F
AT1G11510	F	F	F	F	F	F	T	F	F	F	-	F	F	F	F	F	F	F	F	F	-	-	T	F	F	F	F	F	F	F	F	F	F	F	F	F	F	F	F	F	F	F	F
AT1G11520	F	F	F	F	F	F	T	F	F	F	-	F	F	F	F	F	F	F	F	F	-	-	T	F	F	F	F	F	F	F	F	F	F	F	F	F	F	F	F	F	F	F	F
AT1G11530	F	F	F	F	F	F	T	F	F	F	-	F	F	F	F	F	F	F	F	F	-	-	T	F	F	F	F	F	F	F	F	F	F	F	F	F	F	F	F	F	F	F	F
AT1G11540	F	F	F	F	F	F	T	F	F	F	-	F	F	F	F	F	F	F	F	F	-	-	T	F	F	F	F	F	F	F	F	F	F	F	F	F	F	F	F	F	F	F	F
AT1G11545	F	F	F	F	F	F	F	F	F	F	-	F	F	F	F	F	F	F	F	F	-	-	F	F	F	F	F	F	F	F	F	F	F	F	F	F	F	F	F	F	F	F	F
AT1G11550	F	F	F	F	F	F	F	F	F	F	-	F	F	F	F	F	F	F	F	F	-	-	F	F	F	F	F	F	F	F	F	F	F	F	F	F	F	F	F	F	F	F	F
AT1G11560	F	F	F	F	F	F	F	F	F	F	-	F	F	F	F	F	F	F	F	F	-	-	F	F	F	F	F	F	F	F	F	F	F	F	F	F	F	F	F	F	F	F	F
AT1G11570	F	F	F	F	F	F	F	F	F	F	-	F	F	F	F	F	F	F	F	F	-	-	F	F	F	F	F	F	F	F	F	F	F	F	F	F	F	F	F	F	F	F	F
AT1G11572	F	F	F	F	F	F	F	F	F	F	-	F	F	F	F	F	F	F	F	F	-	-	F	F	F	F	F	F	F	F	F	F	F	F	F	F	F	F	F	F	F	F	F
AT1G11580	F	F	F	F	F	F	F	F	F	F	-	F	F	F	F	F	F	F	F	F	-	-	T	F	F	F	F	T	F	F	F	F	F	F	F	F	F	F	F	F	F	F	F
AT1G11590	F	F	F	F	F	F	F	F	F	F	-	F	F	F	F	F	F	F	F	F	-	-	F	F	F	F	F	F	F	F	F	F	F	F	F	F	F	F	F	F	F	F	F
AT1G11592	F	F	F	F	F	F	F	F	F	F	-	F	F	F	F	F	F	F	F	F	-	-	F	F	F	F	F	F	F	F	F	F	F	F	F	F	F	F	F	F	F	F	F
AT1G11595	F	F	F	F	F	F	F	F	F	F	-	F	F	F	F	F	F	F	F	F	-	-	F	F	F	F	F	F	F	F	F	F	F	F	F	F	F	F	F	F	F	F	F
AT1G11600	F	F	F	F	F	F	F	F	F	F	-	F	F	F	F	F	F	F	F	F	-	-	F	F	F	F	F	F	F	F	F	F	F	F	F	F	F	F	F	F	F	F	F
AT1G11608	F	F	F	F	F	F	F	F	F	F	-	F	F	F	F	F	F	F	F	F	-	-	F	F	F	F	F	F	F	F	F	F	F	F	F	F	F	F	F	F	F	F	F
AT1G11610	F	F	F	F	F	F	F	F	F	F	-	F	F	F	F	F	F	F	F	F	-	-	F	F	F	F	F	F	F	F	F	F	F	F	F	F	F	F	F	F	F	F	F
AT1G11620	F	F	F	F	F	F	F	F	F	F	-	F	F	F	F	F	F	F	F	F	-	-	F	F	F	F	F	F	F	F	F	F	F	F	F	F	F	F	F	F	F	F	F
AT1G11630	F	F	F	F	F	F	F	F	F	F	-	F	F	F	F	F	F	F	F	F	-	-	F	F	F	F	F	F	F	F	F	F	F	F	F	F	F	F	F	F	F	F	F
AT1G11640	F	F	F	F	F	F	F	F	F	F	-	F	F	F	F	F	F	F	F	F	-	-	F	F	F	F	F	F	F	F	F	F	F	F	F	F	F	F	F	F	F	F	F
AT1G11650	F	F	F	F	F	F	F	F	F	F	-	F	F	F	F	F	F	F	F	F	-	-	F	F	F	F	F	F	F	F	F	F	F	F	F	F	F	F	F	F	F	F	F
AT1G11655	F	F	F	F	F	F	F	F	F	F	-	F	F	F	F	F	F	F	F	F	-	-	F	F	F	F	F	F	F	F	F	F	F	F	F	F	F	F	F	F	F	F	F
AT1G11660	F	F	F	F	F	F	F	F	F	F	-	F	F	F	F	F	F	F	F	F	-	-	F	F	F	F	F	F	F	F	F	F	F	F	F	F	F	F	F	F	F	F	F
AT1G11670	F	F	F	F	F	F	F	F	F	F	-	F	F	F	F	F	F	F	F	F	-	-	F	F	F	F	F	F	F	F	F	F	F	F	F	F	F	F	F	F	F	F	F
AT1G11680	F	F	F	F	F	F	F	F	F	F	-	F	F	F	F	F	F	F	F	F	-	-	F	F	F	F	F	F	F	F	F	F	F	F	F	F	F	F	F	F	F	F	F
AT1G11684	F	F	F	F	F	F	F	F	F	F	-	F	F	F	F	F	F	F	F	F	-	-	F	F	F	F	F	F	F	F	F	F	F	F	F	F	F	F	F	F	F	F	F
AT1G11690	F	F	F	F	F	F	F	F	F	F	-	F	F	F	F	F	F	F	F	F	-	-	F	F	F	F	F	F	F	F	F	F	F	F	F	F	F	F	F	F	F	F	F
AT1G11700	F	F	F	F	F	F	F	F	F	F	-	F	F	F	F	F	F	F	F	F	-	-	F	F	F	F	F	F	F	F	F	F	F	F	F	F	F	F	F	F	F	F	F
AT1G11710	F	F	F	F	F	F	F	F	F	F	-	F	F	F	F	F	F	F	F	F	-	-	F	F	F	F	F	F	F	F	F	F	F	F	F	F	F	F	F	F	F	F	F
AT1G11720	F	F	F	F	F	F	F	F	F	F	-	F	F	F	F	F	F	F	F	F	-	-	F	F	F	F	F	F	F	F	F	F	F	F	F	F	F	F	F	F	F	F	F
AT1G11730	F	F	F	F	F	F	F	F	F	F	-	F	F	F	F	F	F	F	F	F	-	-	F	F	F	F	F	F	F	F	F	F	F	F	F	F	F	F	F	F	F	F	F
AT1G11735	F	F	F	F	F	F	F	F	F	F	-	F	F	F	F	F	F	F	F	F	-	-	F	F	F	F	F	F	F	F	F	F	F	F	F	F	F	F	F	F	F	F	F
AT1G11740	F	F	F	F	F	F	F	F	F	F	-	F	F	F	F	F	F	F	F	F	-	-	F	F	F	F	F	F	F	F	F	F	F	F	F	F	F	F	F	F	F	F	F
AT1G11750	F	F	F	F	F	F	F	F	F	F	-	F	F	F	F	F	F	F	F	F	-	-	F	F	F	F	F	F	F	F	F	F	F	F	F	F	F	F	F	F	F	F	F
AT1G11755	F	F	F	F	F	F	F	F	F	F	-	F	F	F	F	F	F	F	F	F	-	-	F	F	F	F	F	F	F	F	F	F	F	F	F	F	F	F	F	F	F	F	F
AT1G11760	F	F	F	F	F	F	F	F	F	F	-	F	F	F	F	F	F	F	F	F	-	-	F	F	F	F	F	F	F	F	F	F	F	F	F	F	F	F	F	F	F	F	F
AT1G11765	F	F	F	F	F	F	F	F	F	F	-	F	F	F	F	F	F	F	F	F	-	-	F	F	F	F	F	F	F	F	F	F	F	F	F	F	F	F	F	F	F	F	F
AT1G11770	F	F	F	F	F	F	F	F	F	F	-	F	F	F	F	F	F	F	F	F	-	-	F	F	F	F	F	F	F	F	F	F	F	F	F	F	F	F	F	F	F	F	F
AT1G11780	F	F	F	F	F	F	F	F	F	F	-	F	F	F	F	F	F	F	F	F	-	-	F	F	F	F	F	F	F	F	F	F	F	F	F	F	F	F	F	F	F	F	F
AT1G11785	F	F	F	F	F	F	F	F	F	F	-	F	F	F	F	F	F	F	F	F	-	-	F	F	F	F	F	F	F	F	F	F	F	F	F	F	F	F	F	F	F	F	F
AT1G11790	F	F	F	F	F	F	F	F	F	F	-	F	F	F	F	F	F	F	F	F	-	-	F	F	F	F	F	F	F	F	F	F	F	F	F	F	F	F	F	F	F	F	F
AT1G11800	F	F	F	F	F	F	F	F	F	F	-	F	F	F	F	F	F	F	F	F	-	-	F	F	F	F	F	F	F	F	F	F	F	F	F	F	F	F	F	F	F	F	F
AT1G11803	F	F	F	F	F	F	F	F	F	F	-	F	F	F	F	F	F	F	F	F	-	-	F	F	F	F	F	F	F	F	F	F	F	F	F	F	F	F	F	F	F	F	F
AT1G11806	F	F	F	F	F	F	F	F	F	F	-	F	F	F	F	F	F	F	F	F	-	-	F	F	F	F	F	F	F	F	F	F	F	F	F	F	F	F	F	F	F	F	F
AT1G11810	F	F	F	F	F	F	F	F	F	F	-	F	F	F	F	F	F	F	F	F	-	-	F	F	F	F	F	F	F	F	F	F	F	F	F	F	F	F	F	F	F	F	F
AT1G11820	F	F	F	F	F	F	F	F	F	F	-	F	F	F	F	F	F	F	F	F	-	-	F	F	F	F	F	F	F	F	F	F	F	F	F	F	F	F	F	F	F	F	F
AT1G11840	F	F	F	F	F	F	F	F	F	F	-	F	F	F	F	F	F	F	F	F	-	-	F	F	F	F	F	F	F	F	F	F	F	F	F	F	F	F	F	F	F	F	F
AT1G11850	F	F	F	F	F	F	F	F	F	F	-	F	F	F	F	F	F	F	F	F	-	-	F	F	F	F	F	F	F	F	F	F	F	F	F	F	F	F	F	F	F	F	F
AT1G11860	F	F	F	F	F	F	F	F	F	F	-	F	F	F	F	F	F	F	F	F	-	-	F	F	F	F	F	F	F	F	F	F	F	F	F	F	F	F	F	F	F	F	F
AT1G11870	F	F	F	F	F	F	F	F	F	F	-	F	F	F	F	F	F	F	F	F	-	-	F	F	F	F	F	F	F	F	F	F	F	F	F	F	F	F	F	F	F	F	F
AT1G11880	F	F	F	F	F	F	F	F	F	F	-	F	F	F	F	F	F	F	F	F	-	-	F	F	F	F	F	F	F	F	F	F	F	F	F	F	F	F	F	F	F	F	F
AT1G11890	F	F	F	F	F	F	F	F	F	F	-	F	F	F	F	F	F	F	F	F	-	-	F	F	F	F	F	F	F	F	F	F	F	F	F	F	F	F	F	F	F	F	F
AT1G11900	F	F	F	F	F	F	F	F	F	F	-	F	F	F	F	F	F	F	F	F	-	-	F	F	F	F	F	F	F	F	F	F	F	F	F	F	F	F	F	F	F	F	F
AT1G11905	F	F	F	F	F	F	F	F	F	F	-	F	F	F	F	F	F	F	F	F	-	-	F	F	F	F	F	F	F	F	F	F	F	F	F	F	F	F	F	F	F	F	F
AT1G11910	F	F	F	F	F	F	F	F	F	F	-	F	F	F	F	F	F	F	F	F	-	-	F	F	F	F	F	F	F	F	F	F	F	F	F	F	F	F	F	F	F	F	F
AT1G11915	F	F	F	F	F	F	F	F	F	F	-	F	F	F	F	F	F	F	F	F	-	-	F	F	F	F	F	F	F	F	F	F	F	F	F	F	F	F	F	F	F	F	F
AT1G11920	F	F	F	F	F	F	F	F	F	F	-	F	F	F	F	F	F	F	F	F	-	-	F	F	F	F	F	F	F	F	F	F	F	F	F	F	F	F	F	F	F	F	F
AT1G11925	F	F	F	F	F	F	F	F	F	F	-	F	F	F	F	F	F	F	F	F	-	-	F	F	F	F	F	F	F	F	F	F	F	F	F	F	F	F	F	F	F	F	F
AT1G11930	F	F	F	F	F	F	F	F	F	F	-	F	F	F	F	F	F	F	F	F	-	-	F	F	F	T	F	F	F	F	F	F	F	F	F	F	F	F	F	F	F	F	F
AT1G11940	F	F	F	F	F	F	F	F	F	F	-	F	F	F	F	F	F	F	F	F	-	-	F	F	F	T	F	F	F	F	F	F	F	F	F	F	F	F	F	F	F	F	F
AT1G11950	F	F	F	F	F	F	F	F	F	F	-	F	F	F	F	F	F	F	F	F	-	-	F	F	F	F	F	F	F	F	F	F	F	F	F	F	F	F	F	F	F	F	F
AT1G11960	F	F	F	F	F	F	F	F	F	F	-	F	F	F	F	F	F	F	F	F	-	-	F	F	F	F	F	F	F	F	F	F	F	F	F	F	F	F	F	F	F	F	F
AT1G11970	F	F	F	F	F	F	F	F	F	F	-	F	F	F	F	F	F	F	F	F	-	-	F	F	F	F	F	F	F	F	F	F	F	F	F	F	F	F	F	F	F	F	F
AT1G11980	F	F	F	F	F	F	F	F	F	F	-	F	F	F	F	F	F	F	F	F	-	-	F	F	F	F	F	F	F	F	F	F	F	F	F	F	F	F	F	F	F	F	F
AT1G11990	F	F	F	F	F	F	F	F	F	F	-	F	F	F	F	F	F	F	F	F	-	-	F	F	F	F	F	F	F	F	F	F	F	F	F	F	F	F	F	F	F	F	F
AT1G12000	F	F	F	F	F	F	F	F	F	F	-	F	F	F	F	F	F	F	F	F	-	-	F	F	F	F	F	F	F	F	F	F	F	F	F	F	F	F	F	F	F	F	F
AT1G12010	F	F	F	F	F	F	F	F	F	F	-	F	F	F	F	F	F	F	F	F	-	-	F	F	F	F	F	F	F	F	F	F	F	F	F	F	F	F	F	F	F	F	F
AT1G12013	F	F	F	F	F	F	F	F	F	F	-	F	F	F	F	F	F	F	F	F	-	-	F	F	F	F	F	F	F	F	F	F	F	F	F	F	F	F	F	F	F	F	F
AT1G12015	F	F	F	F	F	F	F	F	F	F	-	F	F	F	F	F	F	F	F	F	-	-	F	F	F	F	F	F	F	F	F	F	F	F	F	F	F	F	F	F	F	F	F
AT1G12020	F	F	F	F	F	F	F	F	F	F	-	F	F	F	F	F	F	F	F	F	-	-	F	F	F	F	F	F	F	F	F	F	F	F	F	F	F	F	F	F	F	F	F
AT1G12030	F	F	F	F	F	F	F	F	F	F	-	F	F	F	F	F	F	F	F	F	-	-	F	F	F	F	F	F	F	F	F	F	F	F	F	F	F	F	F	F	F	F	F
AT1G12040	F	F	F	F	F	F	F	F	F	F	-	F	F	F	F	F	F	F	F	F	-	-	F	F	F	F	F	F	F	F	F	F	F	F	F	F	F	F	F	F	F	F	F
AT1G12050	F	F	F	F	F	F	F	F	F	F	-	F	F	F	F	F	F	F	F	F	-	-	F	F	F	F	F	F	F	F	F	F	F	F	F	F	F	F	F	F	F	F	F
AT1G12060	F	F	F	F	F	F	F	F	F	F	-	F	F	F	F	F	F	F	F	F	-	-	F	F	F	F	F	F	F	F	F	F	F	F	F	F	F	F	F	F	F	F	F
AT1G12064	F	F	F	F	F	F	F	F	F	F	-	F	F	F	F	F	F	F	F	F	-	-	F	F	F	F	F	F	F	F	F	F	F	F	F	F	F	F	F	F	F	F	F
AT1G12070	F	F	F	F	F	F	F	F	F	F	-	F	F	F	F	F	F	F	F	F	-	-	F	F	F	F	F	F	F	F	F	F	F	F	F	F	F	F	F	F	F	F	F
AT1G12080	F	F	F	F	F	F	F	F	F	F	-	F	F	F	F	F	F	F	F	F	-	-	F	F	F	F	F	F	F	F	F	F	F	F	F	F	F	F	F	F	F	F	F
AT1G12090	F	F	F	F	F	F	F	F	F	F	-	F	F	F	F	F	F	F	F	F	-	-	F	F	F	F	F	F	F	F	F	F	F	F	F	F	F	F	F	F	F	F	F
AT1G12100	F	F	F	F	F	F	F	F	F	F	-	F	F	F	F	F	F	F	F	F	-	-	F	F	F	F	F	F	F	F	F	F	F	F	F	F	F	F	F	F	F	F	F
AT1G12110	F	F	F	F	F	F	F	F	F	F	-	F	F	F	F	F	F	F	F	F	-	-	F	F	F	F	F	F	F	F	F	F	F	F	F	F	F	F	F	F	F	F	F
AT1G12120	F	F	F	F	F	F	F	F	F	F	-	F	F	F	F	F	F	F	F	F	-	-	F	F	F	F	F	F	F	F	F	F	F	F	F	F	F	F	F	F	F	F	F
AT1G12130	F	F	F	F	F	F	F	F	F	F	-	F	F	F	F	F	F	F	F	F	-	-	F	F	F	F	F	F	F	F	F	F	F	F	F	F	F	F	F	F	F	F	F
AT1G12140	F	F	F	F	F	F	F	F	F	F	-	F	F	F	F	F	F	F	F	F	-	-	F	F	F	F	F	F	F	F	F	F	F	F	F	F	F	F	F	F	F	F	F
AT1G12150	F	F	F	F	F	F	F	F	F	F	-	F	F	F	F	F	F	F	F	F	-	-	F	F	F	F	F	F	F	F	F	F	F	F	F	F	F	F	F	F	F	F	F
AT1G12160	F	F	F	F	F	F	F	F	F	F	-	F	F	F	F	F	F	F	F	F	-	-	F	F	F	F	F	F	F	F	F	F	F	F	F	F	F	F	F	F	F	F	F
AT1G12170	F	F	F	F	F	F	F	F	F	F	-	F	F	F	F	F	F	F	F	F	-	-	F	F	F	F	F	F	F	F	F	F	F	F	F	F	F	F	F	F	F	F	F
AT1G12180	F	F	F	F	F	F	F	F	F	F	-	F	F	F	F	F	F	F	F	F	-	-	F	F	F	F	F	F	F	F	F	F	F	F	F	F	F	F	F	F	F	F	F
AT1G12190	F	F	F	F	F	F	F	F	F	F	-	F	F	F	F	F	F	F	F	F	-	-	F	F	F	F	F	F	F	F	F	F	F	F	F	F	F	F	F	F	F	F	F
AT1G12200	F	F	F	F	F	F	F	F	F	F	-	F	F	F	F	F	F	F	F	F	-	-	F	F	F	F	F	F	F	F	F	F	F	F	F	F	F	F	F	F	F	F	F
AT1G12210	F	F	F	F	F	F	F	F	F	F	-	F	F	F	F	F	F	F	F	F	-	-	F	F	F	F	F	F	F	F	F	F	F	F	F	F	F	F	F	F	F	F	F
AT1G12211	F	F	F	F	F	F	F	F	F	F	-	F	F	F	F	F	F	F	F	F	-	-	F	F	F	F	F	F	F	F	F	F	F	F	F	F	F	F	F	F	F	F	F
AT1G12220	F	F	F	F	F	F	F	F	F	F	-	F	F	F	F	F	F	F	F	F	-	-	F	F	F	F	F	F	F	F	F	F	F	F	F	F	F	F	F	F	F	F	F
AT1G12230	F	F	F	F	F	F	F	F	F	F	-	F	F	F	F	F	F	F	F	F	-	-	F	F	F	F	F	F	F	F	F	F	F	F	F	F	F	F	F	F	F	F	F
AT1G12240	F	F	F	F	F	F	F	F	F	F	-	F	F	F	F	F	F	F	F	F	-	-	F	F	F	F	F	F	F	F	F	F	F	F	F	F	F	F	F	F	F	F	F
AT1G12244	F	F	F	F	F	F	F	F	F	F	-	F	F	F	F	F	F	F	F	F	-	-	F	F	F	F	F	F	F	F	F	F	F	F	F	F	F	F	F	F	F	F	F
AT1G12250	F	F	F	F	F	F	F	F	F	F	-	F	F	F	F	F	F	F	F	F	-	-	F	F	F	F	F	F	F	F	F	F	F	F	F	F	F	F	F	F	F	F	F
AT1G12260	F	F	F	F	F	F	F	F	F	F	-	F	F	F	F	F	F	F	F	F	-	-	F	F	F	F	F	F	F	F	F	F	F	F	F	F	F	F	F	F	F	F	F
AT1G12270	F	F	F	F	F	F	F	F	F	F	-	F	F	F	F	F	F	F	F	F	-	-	F	F	F	F	F	F	F	F	F	F	F	F	F	F	F	F	F	F	F	F	F
AT1G12280	F	F	F	F	F	F	F	F	F	F	-	F	F	F	F	F	F	F	F	F	-	-	F	F	F	F	F	F	F	F	F	F	F	F	F	F	F	F	F	F	F	F	F
AT1G12290	F	F	F	F	F	F	F	F	F	F	-	F	F	F	F	F	F	F	F	F	-	-	F	F	F	F	F	F	F	F	F	F	F	F	F	F	F	F	F	F	F	F	F
AT1G12294	F	F	F	F	F	F	F	F	F	F	-	F	F	F	F	F	F	F	F	F	-	-	F	F	F	F	F	F	F	F	F	F	F	F	F	F	F	F	F	F	F	F	F
AT1G12300	F	F	F	F	F	F	F	F	F	F	-	F	F	F	F	F	F	F	F	F	-	-	F	F	F	F	F	F	F	F	F	F	F	F	F	F	F	F	F	F	F	F	F
AT1G12310	F	F	F	F	F	F	F	F	F	F	-	F	F	F	F	F	F	F	F	F	-	-	F	F	F	F	F	F	F	F	F	F	F	F	F	F	F	F	F	F	F	F	F
AT1G12320	F	F	F	F	F	F	F	F	F	F	-	F	F	F	F	F	F	F	F	F	-	-	F	F	F	F	F	F	F	F	F	F	F	F	F	F	F	F	F	F	F	F	F
AT1G12330	F	F	F	F	F	F	F	F	F	F	-	F	F	F	F	F	F	F	F	F	-	-	F	F	F	F	F	F	F	F	F	F	F	F	F	F	F	F	F	F	F	F	F
AT1G12340	F	F	F	F	F	F	F	F	F	F	-	F	F	F	F	F	F	F	F	F	-	-	F	F	F	F	F	F	F	F	F	F	F	F	F	F	F	F	F	F	F	F	F
AT1G12350	F	F	F	F	F	F	F	F	F	F	-	F	F	F	F	F	F	F	F	F	-	-	F	F	F	F	F	F	F	F	F	F	F	F	F	F	F	F	F	F	F	F	F
AT1G12360	F	F	F	F	F	F	F	F	F	F	-	F	F	F	F	F	F	F	F	F	-	-	F	F	F	F	F	F	F	F	F	F	F	F	F	F	F	F	F	F	F	F	F
AT1G12370	F	F	F	F	F	F	F	F	F	F	-	F	F	F	F	F	F	F	F	F	-	-	F	F	F	F	F	F	F	F	F	F	F	F	F	F	F	F	F	F	F	F	F
AT1G12380	F	F	F	F	F	F	F	F	F	F	-	F	F	F	F	F	F	F	F	F	-	-	F	F	F	F	F	F	F	F	F	F	F	F	F	F	F	F	F	F	F	F	F
AT1G12390	F	F	F	F	F	F	F	F	F	F	-	F	F	F	F	F	F	F	F	T	-	-	F	F	F	F	F	F	F	F	F	F	F	F	F	F	F	F	F	F	F	F	F
AT1G12400	F	F	F	F	F	F	F	F	F	F	-	F	F	F	F	F	F	F	F	T	-	-	F	F	F	F	F	F	F	F	F	F	F	F	F	F	F	F	F	F	F	F	F
AT1G12410	F	F	F	F	F	F	F	F	F	F	-	F	F	F	F	F	F	F	F	T	-	-	F	F	F	F	F	F	F	F	F	F	F	F	F	F	F	F	F	F	F	F	F
AT1G12411	F	F	F	F	F	F	F	F	F	F	-	F	F	F	F	F	F	F	F	F	-	-	F	F	F	F	F	F	F	F	F	F	F	F	F	F	F	F	F	F	F	F	F
AT1G12420	F	F	F	F	F	F	F	F	F	F	-	F	F	F	F	F	F	F	F	F	-	-	F	F	F	F	F	F	F	F	F	F	F	F	F	F	F	F	F	F	F	F	F
AT1G12430	F	F	F	F	F	F	F	F	F	F	-	F	F	F	F	F	F	F	F	F	-	-	F	F	F	F	F	F	F	F	F	F	F	F	F	F	F	F	F	F	F	F	F
AT1G12440	F	F	F	F	F	F	F	F	F	F	-	F	F	F	F	F	F	F	F	F	-	-	F	F	F	F	F	F	F	F	F	F	F	F	F	F	F	F	F	F	F	F	F
AT1G12450	F	F	F	F	F	F	F	F	F	F	-	F	F	F	F	F	F	F	F	F	-	-	F	F	F	F	F	F	F	F	F	F	F	F	F	F	F	F	F	F	F	F	F
AT1G12451	F	F	F	F	F	F	F	F	F	F	-	F	F	F	F	F	F	F	F	F	-	-	F	F	F	F	F	F	F	F	F	F	F	F	F	F	F	F	F	F	F	F	F
AT1G12460	F	F	F	F	F	F	F	F	F	F	-	F	F	F	F	F	F	F	F	F	-	-	F	F	F	F	F	F	F	F	F	F	F	F	F	F	F	F	F	F	F	F	F
AT1G12470	F	F	F	F	F	F	F	F	F	F	-	F	F	F	F	F	F	F	F	F	-	-	F	F	F	F	F	F	F	F	F	F	F	F	F	F	F	F	F	F	F	F	F
AT1G12480	F	F	F	F	F	F	F	F	F	F	-	F	F	F	F	F	F	F	F	F	-	-	F	F	F	F	F	F	F	F	F	F	F	F	F	F	F	F	F	F	F	F	F
AT1G12490	F	F	F	F	F	F	F	F	F	F	-	F	F	F	F	F	F	F	F	F	-	-	F	F	F	F	F	F	F	F	F	F	F	F	F	F	F	F	F	F	F	F	F
AT1G12500	F	F	F	F	F	F	F	F	F	F	-	F	F	F	F	F	F	F	F	F	-	-	F	F	F	F	F	F	F	F	F	F	F	F	F	F	F	F	F	F	F	F	F
AT1G12510	F	F	F	F	F	F	F	F	F	F	-	F	F	F	F	F	F	F	F	F	-	-	F	F	F	F	F	F	F	F	F	F	F	F	F	F	F	F	F	F	F	F	F
AT1G12520	F	F	F	F	F	F	F	F	F	F	-	F	F	F	F	F	F	F	F	F	-	-	F	F	F	F	F	F	F	F	F	F	F	F	F	F	F	F	F	F	F	F	F
AT1G12530	F	F	F	F	F	F	F	F	F	F	-	F	F	F	F	F	F	F	F	F	-	-	F	F	F	F	F	F	F	F	F	F	F	F	F	F	F	F	F	F	F	F	F
AT1G12540	F	F	F	F	F	F	F	F	F	F	-	F	F	F	F	F	F	F	F	F	-	-	F	F	F	F	F	F	F	F	F	F	F	F	F	F	F	F	F	F	F	F	F
AT1G12550	F	F	F	F	F	F	F	F	F	F	-	F	F	F	F	F	F	F	F	F	-	-	F	F	F	F	F	F	F	F	F	F	F	F	F	F	F	F	F	F	F	F	F
AT1G12560	F	F	F	F	F	F	F	F	F	F	-	F	F	F	F	F	F	F	F	F	-	-	F	F	F	F	F	F	F	F	F	F	F	F	F	F	F	F	F	F	F	F	F
AT1G12570	F	F	F	F	F	F	F	F	F	F	-	F	F	F	F	F	F	F	F	F	-	-	F	F	F	F	F	F	F	F	F	F	F	F	F	F	F	F	F	F	F	F	F
AT1G12580	F	F	F	F	F	F	F	F	F	F	-	F	F	F	F	F	F	F	F	F	-	-	F	F	F	F	F	F	F	F	F	F	F	F	F	F	F	F	F	F	F	F	F
AT1G12590	F	F	F	F	F	F	F	F	F	F	-	F	F	F	F	F	F	F	F	F	-	-	F	F	F	F	F	F	F	F	F	F	F	F	F	F	F	F	F	F	F	F	F
AT1G12600	F	F	F	F	F	F	F	F	F	F	-	F	F	F	F	F	F	F	F	F	-	-	F	F	F	F	F	F	F	F	F	F	F	F	F	F	F	F	F	F	F	F	F
AT1G12610	F	F	F	F	F	F	F	F	F	F	-	F	F	F	F	F	F	F	F	F	-	-	F	F	F	F	F	F	F	F	F	F	F	F	F	F	F	F	F	F	F	F	F
AT1G12620	F	F	F	F	F	F	F	F	F	F	-	F	F	F	F	F	F	F	F	F	-	-	F	F	F	F	F	F	F	F	F	F	F	F	F	F	F	F	F	F	F	F	F
AT1G12630	F	F	F	F	F	F	F	F	F	F	-	F	F	F	F	F	F	F	F	F	-	-	F	F	F	F	F	F	F	F	F	F	F	F	F	F	F	F	F	F	F	F	F
AT1G12640	F	F	F	F	F	F	F	F	F	F	-	F	F	F	F	F	F	F	F	F	-	-	F	F	F	F	F	F	F	F	F	F	F	F	F	F	F	F	F	F	F	F	F
AT1G12650	F	F	F	F	F	F	F	F	F	F	-	F	F	F	F	F	F	F	F	F	-	-	F	F	F	F	F	F	F	F	F	F	F	F	F	F	F	F	F	F	F	F	F
AT1G12660	F	F	F	F	F	F	F	F	F	F	-	F	F	F	F	F	F	F	F	F	-	-	F	F	F	F	F	F	F	F	F	F	F	F	F	F	F	F	F	F	F	F	F
AT1G12663	F	F	F	F	F	F	F	F	F	F	-	F	F	F	F	F	F	F	F	F	-	-	F	F	F	F	F	F	F	F	F	F	F	F	F	F	F	F	F	F	F	F	F
AT1G12665	F	F	F	F	F	F	F	F	F	F	-	F	F	F	F	F	F	F	F	F	-	-	F	F	F	F	F	F	F	F	F	F	F	F	F	F	F	F	F	F	F	F	F
AT1G12667	F	F	F	F	F	F	F	F	F	F	-	F	F	F	F	F	F	F	F	F	-	-	F	F	F	F	F	F	F	F	F	F	F	F	F	F	F	F	F	F	F	F	F
AT1G12669	F	F	F	F	F	F	F	F	F	F	-	F	F	F	F	F	F	F	F	F	-	-	F	F	F	F	F	F	F	F	F	F	F	F	F	F	F	F	F	F	F	F	F
AT1G12670	F	F	F	F	F	F	F	F	F	F	-	F	F	F	F	F	F	F	F	F	-	-	F	F	F	F	F	F	F	F	F	F	F	F	F	F	F	F	F	F	F	F	F
AT1G12672	F	F	F	F	F	F	F	F	F	F	-	F	F	F	F	F	F	F	F	F	-	-	F	F	F	F	F	F	F	F	F	F	F	F	F	F	F	F	F	F	F	F	F
AT1G12680	F	F	F	F	F	F	F	F	F	F	-	F	F	F	F	F	F	F	F	F	-	-	F	F	F	F	F	F	F	F	F	F	F	F	F	F	F	F	F	F	F	F	F
AT1G12700	F	F	F	F	F	F	F	F	F	F	-	F	F	F	F	F	F	F	F	F	-	-	F	F	F	F	F	F	F	F	F	F	F	F	F	F	F	F	F	F	F	F	F
AT1G12710	F	F	F	F	F	F	F	F	F	F	-	F	F	F	F	F	F	F	F	F	-	-	F	F	F	F	F	F	F	F	F	F	F	F	F	F	F	F	F	F	F	F	F
AT1G12720	F	F	F	F	F	F	F	F	F	F	-	F	F	F	F	F	F	F	F	F	-	-	F	F	F	F	F	F	F	F	F	F	F	F	F	F	F	F	F	F	F	F	F
AT1G12725	F	F	F	F	F	F	F	F	F	F	-	F	F	F	F	F	F	F	F	F	-	-	F	F	F	F	F	F	F	F	F	F	F	F	F	F	F	F	F	F	F	F	F
AT1G12730	F	F	F	F	F	F	F	F	F	F	-	F	F	F	F	F	F	F	F	F	-	-	F	F	F	F	F	F	F	F	F	F	F	F	F	F	F	F	F	F	F	F	F
AT1G12740	F	F	F	F	F	F	F	F	F	F	-	F	F	F	F	F	F	F	F	F	-	-	F	F	F	F	F	F	F	F	F	F	F	F	F	F	F	F	F	F	F	F	F
AT1G12750	F	F	F	F	F	F	F	F	F	F	-	F	F	F	F	F	F	F	F	F	-	-	F	F	F	F	F	F	F	F	F	F	F	F	F	F	F	F	F	F	F	F	F
AT1G12760	F	F	F	F	F	F	F	F	F	F	-	F	F	F	F	T	F	F	F	F	-	-	F	F	F	F	F	F	F	F	F	F	F	F	F	F	F	F	F	F	F	F	F
AT1G12770	F	F	F	F	F	F	F	F	F	F	-	F	F	F	F	F	F	F	F	F	-	-	F	F	F	F	F	F	F	F	F	F	F	F	F	F	F	F	F	F	F	F	F
AT1G12775	F	F	F	F	F	F	F	F	F	F	-	F	F	F	F	F	F	F	F	F	-	-	F	F	F	F	F	F	F	F	F	F	F	F	F	F	F	F	F	F	F	F	F
AT1G12780	F	F	F	F	F	F	F	F	F	F	-	F	F	F	F	F	F	F	F	F	-	-	F	F	F	F	F	F	F	F	F	F	F	F	F	F	F	F	F	F	F	F	F
AT1G12790	F	F	F	F	F	F	F	F	F	F	-	F	F	F	F	F	F	F	F	F	-	-	F	F	F	F	F	F	F	F	F	F	F	F	F	T	F	F	F	F	F	F	F
AT1G12800	F	F	F	F	F	F	F	F	F	F	-	F	F	F	F	F	F	F	F	F	-	-	F	F	F	F	F	F	F	F	F	F	F	F	F	F	F	F	F	F	F	F	F
AT1G12805	F	F	F	F	F	F	F	F	F	F	-	F	F	F	F	F	F	F	F	F	-	-	F	F	F	F	F	F	F	F	F	F	F	F	F	F	F	F	F	F	F	F	F
AT1G12810	F	F	F	F	F	F	F	F	F	F	-	F	F	F	F	F	F	F	F	F	-	-	F	F	F	F	F	F	F	F	F	F	F	F	F	F	F	F	F	F	F	F	F
AT1G12820	F	F	F	F	F	F	F	F	F	F	-	F	F	F	F	F	F	F	F	F	-	-	F	F	F	F	F	F	F	F	F	F	F	F	F	F	F	F	F	F	F	F	F
AT1G12830	F	F	F	F	F	F	F	F	F	F	-	F	F	F	F	F	F	F	F	F	-	-	F	F	F	F	F	F	F	F	F	F	F	F	F	T	F	F	F	F	F	F	F
AT1G12840	F	F	F	F	F	F	F	F	F	F	-	F	F	F	F	F	F	F	F	F	-	-	F	F	F	F	F	F	F	F	F	F	F	F	F	T	F	F	F	F	F	F	F
AT1G12845	F	F	F	F	F	F	F	F	F	F	-	F	F	F	F	F	F	F	F	F	-	-	F	F	F	F	F	F	F	F	F	F	F	F	F	F	F	F	F	F	F	F	F
AT1G12850	F	F	F	F	F	F	F	F	F	F	-	F	F	F	F	F	F	F	F	F	-	-	F	F	F	F	F	F	F	F	F	F	F	F	F	F	F	F	F	F	F	F	F
AT1G12860	F	F	F	F	F	F	F	F	F	F	-	F	F	F	F	F	F	F	F	F	-	-	F	F	F	F	F	F	F	F	F	F	F	F	F	F	F	F	F	F	F	F	F
AT1G12870	F	F	F	F	F	F	F	F	F	F	-	F	F	F	F	F	F	F	F	F	-	-	F	F	F	F	F	F	F	F	F	F	F	F	F	F	F	F	F	F	F	F	F
AT1G12880	F	F	F	F	F	F	F	F	F	F	-	F	F	F	F	F	F	F	F	F	-	-	F	F	F	F	F	F	F	F	F	F	F	F	F	F	F	F	F	F	F	F	F
AT1G12890	F	F	F	F	F	F	F	F	F	F	-	F	F	F	F	F	F	F	F	F	-	-	F	F	F	F	F	F	F	F	F	F	F	F	F	F	F	F	F	F	F	F	F
AT1G12900	F	F	F	F	F	F	F	F	F	F	-	F	F	F	F	F	F	F	F	F	-	-	F	F	F	F	F	F	F	F	F	F	F	F	F	F	F	F	F	F	F	F	F
AT1G12910	F	F	F	F	F	F	F	F	F	F	-	F	F	F	F	F	F	F	F	F	-	-	F	F	F	F	F	F	F	F	F	F	F	F	F	F	F	F	F	F	F	F	F
AT1G12920	F	F	F	F	F	F	F	F	F	F	-	F	F	F	F	F	F	F	F	F	-	-	F	F	F	F	F	F	F	F	F	F	F	F	F	F	F	F	F	F	F	F	F
AT1G12930	F	F	F	F	F	F	F	F	F	F	-	F	F	F	F	F	F	F	F	F	-	-	F	F	F	F	F	F	F	F	F	F	F	F	F	F	F	F	F	F	F	F	F
AT1G12938	F	F	F	F	F	F	F	F	F	F	-	F	F	F	F	F	F	F	F	F	-	-	F	F	F	F	F	F	F	F	F	F	F	F	F	F	F	F	F	F	F	F	F
AT1G12940	F	F	F	F	F	F	F	F	F	F	-	F	F	F	F	F	F	F	F	F	-	-	F	F	F	F	F	F	F	F	F	F	F	F	F	F	F	F	F	F	F	F	F
AT1G12950	F	F	F	F	F	F	F	F	F	F	-	F	F	F	F	F	F	F	F	F	-	-	F	F	F	F	F	F	F	F	F	F	F	F	F	F	F	F	F	F	F	F	F
AT1G12960	F	F	F	F	F	F	F	F	F	F	-	F	F	F	F	F	F	F	F	F	-	-	F	F	F	F	F	F	F	F	F	F	F	F	F	F	F	F	F	F	F	F	F
AT1G12970	F	F	F	F	F	F	F	F	F	F	-	F	F	F	F	F	F	F	F	F	-	-	F	F	F	F	F	F	F	F	F	F	F	F	F	F	F	F	F	F	F	F	F
AT1G12980	F	F	F	F	F	F	F	F	F	F	-	F	F	F	F	F	F	F	F	F	-	-	F	F	F	F	F	F	F	F	F	F	F	F	F	F	F	F	F	F	F	F	F
AT1G12990	F	F	F	F	F	F	F	F	F	F	-	F	F	F	F	F	F	F	F	F	-	-	F	F	F	F	F	F	F	F	F	F	F	F	F	F	F	F	F	F	F	F	F
AT1G13000	F	F	F	F	F	F	F	F	F	F	-	F	F	F	F	F	F	F	F	F	-	-	F	F	F	F	F	F	F	F	F	F	F	F	F	F	F	F	F	F	F	F	F
AT1G13010	F	F	F	F	F	F	F	F	F	F	-	F	F	F	F	F	F	F	F	F	-	-	F	F	F	F	F	F	F	F	F	F	F	F	F	F	F	F	F	F	F	F	F
AT1G13020	F	F	F	F	F	F	F	F	F	F	-	F	F	F	F	F	F	F	F	F	-	-	F	F	F	F	F	F	F	F	F	F	F	F	F	F	F	F	F	F	F	F	F
AT1G13030	F	F	F	F	F	F	F	F	F	F	-	F	F	F	F	F	F	F	F	F	-	-	F	F	F	F	F	F	F	F	F	F	F	F	F	F	F	F	F	F	F	F	F
AT1G13040	F	F	F	F	F	F	F	F	F	F	-	F	F	F	F	F	F	F	F	F	-	-	F	F	F	F	F	F	F	F	F	F	F	F	F	F	F	F	F	F	F	F	F
AT1G13050	F	F	F	F	F	F	F	F	F	F	-	F	F	F	F	F	F	F	F	F	-	-	F	F	F	F	F	F	F	F	F	F	F	F	F	F	F	F	F	F	F	F	F
AT1G13060	F	F	F	F	F	F	F	F	F	F	-	F	F	F	F	F	F	F	F	F	-	-	F	F	F	F	F	F	F	F	F	F	F	F	F	F	F	F	F	F	F	F	F
AT1G13070	F	F	F	F	F	F	F	F	F	F	-	F	F	F	F	F	F	F	F	F	-	-	F	F	F	F	F	F	F	F	F	F	F	F	F	F	F	F	F	F	F	F	F
AT1G13080	F	F	F	F	F	F	F	F	F	F	-	F	F	F	F	F	F	F	F	F	-	-	F	F	F	F	F	F	F	F	F	F	F	F	F	F	F	F	F	F	F	F	F
AT1G13090	F	F	F	F	F	F	F	F	F	F	-	F	F	F	F	F	F	F	F	F	-	-	F	F	F	F	F	F	F	F	F	F	F	F	F	F	F	F	F	F	F	F	F
AT1G13100	F	F	F	F	F	F	F	F	F	F	-	F	F	F	F	F	F	F	F	F	-	-	F	F	F	F	F	F	F	F	F	F	F	F	F	F	F	F	F	F	F	F	F
AT1G13110	F	F	F	F	F	F	F	F	F	F	-	F	F	F	F	F	F	F	F	F	-	-	F	F	F	F	F	F	F	F	F	F	F	F	F	F	F	F	F	F	F	F	F
AT1G13120	F	F	F	F	F	F	F	F	F	F	-	F	F	F	F	F	F	F	F	T	-	-	F	F	F	F	F	F	F	F	F	F	F	F	F	F	F	F	F	F	F	F	F
AT1G13130	F	F	F	F	F	F	F	F	F	F	-	F	F	F	F	F	F	F	F	F	-	-	F	F	F	F	F	F	F	F	F	F	F	F	F	F	F	F	F	F	F	F	F
AT1G13140	F	F	F	F	F	F	F	F	F	F	-	F	F	F	F	F	F	F	F	F	-	-	F	F	F	F	F	F	F	F	F	F	F	F	F	F	F	F	F	F	F	F	F
AT1G13145	F	F	F	F	F	F	F	F	F	F	-	F	F	T	F	F	F	F	F	F	-	-	F	F	F	F	F	F	F	F	F	F	F	F	F	F	T	F	F	F	F	F	F
AT1G13150	F	F	F	F	F	F	F	F	F	F	-	F	F	F	F	F	F	F	F	F	-	-	F	F	F	F	F	F	F	F	F	F	F	F	F	F	F	F	F	F	F	F	F
AT1G13160	F	F	F	F	F	F	F	F	F	F	-	F	F	F	F	F	F	F	F	F	-	-	F	F	F	F	F	F	F	F	F	F	F	F	F	F	F	F	F	F	F	F	F
AT1G13170	F	F	F	F	F	F	F	F	F	F	-	F	F	F	F	F	F	F	F	F	-	-	F	F	F	F	F	F	F	F	F	F	F	F	F	F	F	F	F	F	F	F	F
AT1G13180	F	F	F	F	F	F	F	F	F	F	-	F	F	F	F	F	F	F	F	F	-	-	F	F	F	F	F	F	F	F	F	F	F	F	F	F	F	F	F	F	F	F	F
AT1G13190	F	F	F	F	F	F	F	F	F	F	-	F	F	F	F	F	F	F	F	F	-	-	F	F	F	F	F	F	F	F	F	F	F	F	F	F	F	F	F	F	F	F	F
AT1G13195	F	F	F	F	F	F	F	F	F	F	-	F	F	F	F	F	F	F	F	F	-	-	F	F	F	F	F	F	F	F	F	F	F	F	F	F	F	F	F	F	F	F	F
AT1G13200	F	F	F	F	F	F	F	F	F	F	-	F	F	F	F	F	F	F	F	F	-	-	F	F	F	F	F	F	F	F	F	F	F	F	F	F	F	F	F	F	F	F	F
AT1G13210	F	F	F	F	F	F	F	F	F	F	-	F	F	F	F	F	F	F	F	F	-	-	F	F	F	F	F	F	F	F	F	F	F	F	F	F	F	F	F	F	F	F	F
AT1G13220	F	F	F	F	F	F	F	F	F	F	-	F	F	F	F	F	F	F	F	F	-	-	F	F	F	F	F	F	F	F	F	F	F	F	F	F	F	F	F	F	F	F	F
AT1G13230	F	F	F	F	F	F	F	F	F	F	-	F	F	F	F	F	F	F	F	F	-	-	F	F	F	F	F	F	F	F	F	F	F	F	F	F	F	F	F	F	F	F	F
AT1G13240	F	F	F	F	F	F	F	F	F	F	-	F	F	F	F	F	F	F	F	F	-	-	F	F	F	F	F	F	F	F	F	F	F	F	F	F	F	F	F	F	F	F	F
AT1G13245	F	F	F	F	F	F	F	F	F	F	-	F	F	F	F	F	F	F	F	F	-	-	F	F	F	F	F	F	F	F	F	F	F	F	F	F	F	F	F	F	F	F	F
AT1G13250	F	F	F	F	F	F	F	F	F	F	-	F	F	F	F	F	F	F	F	F	-	-	F	F	F	F	F	F	F	F	F	F	F	F	F	F	F	F	F	F	F	F	F
AT1G13260	F	F	F	F	F	F	F	F	F	F	-	F	F	F	F	F	F	F	F	F	-	-	F	F	F	F	F	F	F	F	F	F	F	F	F	F	F	F	F	F	F	F	F
AT1G13270	F	F	F	F	F	F	F	F	F	F	-	F	F	F	F	F	F	F	F	F	-	-	F	F	F	F	F	F	F	F	F	F	F	F	F	F	F	F	F	F	F	F	F
AT1G13280	F	F	F	F	F	F	F	F	F	F	-	F	F	F	F	F	F	F	F	F	-	-	F	F	F	F	F	F	F	F	F	F	F	F	F	F	F	F	F	F	F	F	F
AT1G13290	F	F	F	F	F	F	F	F	F	F	-	F	F	F	F	F	F	F	F	F	-	-	F	F	F	F	F	F	F	F	F	F	F	F	F	F	F	F	F	F	F	F	F
AT1G13300	F	F	F	F	F	F	F	F	F	F	-	F	F	F	F	F	F	F	F	F	-	-	F	F	F	F	F	F	F	F	F	F	F	F	F	F	F	F	F	F	F	F	F
AT1G13310	F	F	F	F	F	F	F	F	F	F	-	F	F	F	F	F	F	F	F	F	-	-	F	F	F	F	F	F	F	F	F	F	F	F	F	F	F	F	F	F	F	F	F
AT1G13320	F	F	F	F	F	F	F	F	F	F	-	F	F	F	F	F	F	F	F	F	-	-	F	F	F	F	F	F	F	F	F	F	F	F	F	F	F	F	F	F	F	F	F
AT1G13330	F	F	F	F	F	F	F	F	F	F	-	F	F	F	F	F	F	F	F	F	-	-	F	F	F	F	F	F	F	F	F	F	F	F	F	F	F	F	F	F	F	F	F
AT1G13340	F	F	F	F	F	F	F	F	F	F	-	F	F	F	F	F	F	F	F	F	-	-	F	F	F	F	F	F	F	F	F	F	F	F	F	F	F	F	F	F	F	F	F
AT1G13350	F	F	F	F	F	F	F	F	F	F	-	F	F	F	F	F	F	F	F	F	-	-	F	F	F	F	F	F	F	F	F	F	F	F	F	F	F	F	F	F	F	F	F
AT1G13360	F	F	F	F	F	F	F	F	F	F	-	F	F	F	F	F	F	F	F	F	-	-	F	F	F	F	F	F	F	F	F	F	F	F	F	F	F	F	F	F	F	F	F
AT1G13370	F	F	F	F	F	F	F	F	F	F	-	F	F	F	F	F	F	F	F	F	-	-	F	F	F	F	F	F	F	F	F	F	F	F	F	F	F	F	F	F	F	F	F
AT1G13380	F	F	F	F	F	F	F	F	F	F	-	F	F	F	F	F	F	F	F	F	-	-	F	F	F	F	F	F	F	F	F	F	F	F	F	F	F	F	F	F	F	F	F
AT1G13390	F	F	F	F	F	F	F	F	F	F	-	F	F	F	F	F	F	F	F	F	-	-	F	F	F	F	F	F	F	F	F	F	F	F	F	F	F	F	F	F	F	F	F
AT1G13400	F	F	F	F	F	F	F	F	F	F	-	F	F	F	F	F	F	F	F	F	-	-	F	F	F	F	F	F	F	F	F	F	F	F	F	F	F	F	F	F	F	F	F
AT1G13410	F	F	F	F	F	F	F	F	F	F	-	F	F	F	F	F	F	F	F	F	-	-	F	F	F	F	F	F	F	F	F	F	F	F	F	F	F	F	F	F	F	F	F
AT1G13420	F	F	F	F	F	F	F	F	F	F	-	F	F	F	F	F	F	F	F	F	-	-	F	F	F	F	F	F	F	F	F	F	F	F	F	F	F	F	F	F	F	F	F
AT1G13430	F	F	F	F	F	F	F	F	F	F	-	F	F	F	F	F	F	F	F	F	-	-	F	F	F	F	F	F	F	F	F	F	F	F	F	F	F	F	F	F	F	F	F
AT1G13440	F	F	F	F	F	F	F	F	F	F	-	F	F	F	F	F	F	F	F	F	-	-	F	F	F	F	F	F	F	F	F	F	F	F	F	F	F	F	F	F	F	F	F
AT1G13448	F	F	F	F	F	F	F	F	F	F	-	F	F	F	F	F	F	F	F	F	-	-	F	F	F	F	F	F	F	F	F	F	F	F	F	F	F	F	F	F	F	F	F
AT1G13450	F	F	F	F	F	F	F	F	F	F	-	F	F	F	F	F	F	F	F	F	-	-	F	F	F	F	F	F	F	F	F	F	F	F	F	F	F	F	F	F	F	F	F
AT1G13460	F	F	F	F	F	F	F	F	F	F	-	F	F	F	F	F	F	F	F	F	-	-	F	F	F	F	F	F	F	F	F	F	F	F	F	F	F	F	F	F	F	F	F
AT1G13470	F	F	F	F	F	F	F	F	F	F	-	F	F	F	F	F	F	F	F	F	-	-	F	F	F	F	F	F	F	F	F	F	F	F	F	F	F	F	F	F	F	F	F
AT1G13480	F	F	F	F	F	F	F	F	F	F	-	F	F	F	F	T	F	F	F	F	-	-	F	F	F	F	F	F	F	F	F	F	F	F	F	F	F	F	F	F	F	F	F
AT1G13490	F	F	F	F	F	F	F	F	F	F	-	F	F	F	F	F	F	F	F	F	-	-	F	F	F	F	F	F	F	F	F	F	F	F	F	F	F	F	F	F	F	F	F
AT1G13500	F	F	F	F	F	F	F	F	F	F	-	F	F	F	F	F	F	F	F	F	-	-	F	F	F	F	F	F	F	F	F	F	F	F	F	F	F	F	F	F	F	F	F
AT1G13510	F	F	F	F	F	F	F	F	F	F	-	F	F	F	F	F	F	F	F	F	-	-	F	F	F	F	F	F	F	F	F	F	F	F	F	F	F	F	F	F	F	F	F
AT1G13520	F	F	F	F	F	F	F	F	F	F	-	F	F	F	F	F	F	F	F	F	-	-	F	F	F	F	F	F	F	F	F	F	F	F	F	F	F	F	F	F	F	F	F
AT1G13530	F	F	F	F	F	F	F	F	F	F	-	F	F	F	F	F	F	F	F	F	-	-	F	F	F	F	F	F	F	F	F	F	F	F	F	F	F	F	F	F	F	F	F
AT1G13540	F	F	F	F	F	F	F	F	F	F	-	F	F	F	F	F	F	F	F	F	-	-	F	F	F	F	F	T	F	F	F	F	F	F	F	F	F	F	F	F	F	F	F
AT1G13550	F	F	F	F	F	F	F	F	F	F	-	F	F	F	F	F	F	F	F	F	-	-	F	F	F	F	F	T	F	F	F	F	F	F	F	F	F	F	F	F	F	F	F
AT1G13560	F	F	F	F	F	F	F	F	F	F	-	F	F	F	F	F	F	F	F	F	-	-	F	F	F	F	F	F	F	F	F	F	F	F	F	F	F	F	F	F	F	F	F
AT1G13570	F	F	F	F	F	F	F	F	F	F	-	F	F	F	F	F	F	F	F	F	-	-	F	F	F	F	F	F	F	F	F	F	F	F	F	F	F	F	F	F	F	F	F
AT1G13580	F	F	F	F	F	F	F	F	F	F	-	F	F	F	F	F	F	F	F	F	-	-	F	F	F	F	F	F	F	F	F	F	F	F	F	F	F	F	F	F	F	F	F
AT1G13590	F	F	F	F	F	F	F	F	F	F	-	F	F	F	F	F	F	F	F	F	-	-	F	F	F	F	F	F	F	F	F	F	F	F	F	F	F	F	F	F	F	F	F
AT1G13600	F	F	F	F	F	F	F	F	F	F	-	F	F	F	F	F	F	F	F	F	-	-	F	F	F	F	F	F	F	F	F	F	F	F	F	F	F	F	F	F	F	F	F
AT1G13605	F	F	F	F	F	F	F	F	F	F	-	F	F	F	F	F	F	F	F	F	-	-	F	F	F	F	F	F	F	F	F	F	F	F	F	F	F	F	F	F	F	F	F
AT1G13609	F	F	F	F	F	F	F	F	F	F	-	F	F	F	F	F	F	F	F	F	-	-	F	F	F	F	F	F	F	F	F	F	F	F	F	F	F	F	F	F	F	F	F
AT1G13610	F	F	F	F	F	F	F	F	F	F	-	F	F	F	F	F	F	F	F	F	-	-	F	F	F	F	F	F	F	F	F	F	F	F	F	F	F	F	F	F	F	F	F
AT1G13620	F	F	F	F	F	F	F	F	F	F	-	F	F	F	F	F	F	F	F	F	-	-	F	F	F	F	F	F	F	F	F	F	F	F	F	F	F	F	F	F	F	F	F
AT1G13630	F	F	F	F	F	F	F	F	F	F	-	F	F	F	F	F	F	F	F	F	-	-	F	F	F	F	F	F	F	F	F	F	F	F	F	F	F	F	F	F	F	F	F
AT1G13635	F	F	F	F	F	F	F	F	F	F	-	F	F	F	F	F	F	F	F	F	-	-	F	F	F	F	F	F	F	F	F	F	F	F	F	F	F	F	F	F	F	F	F
AT1G13640	F	F	F	F	F	F	F	F	F	F	-	F	F	F	F	F	F	F	F	F	-	-	F	F	F	F	F	F	F	F	F	F	F	F	F	F	F	F	F	F	F	F	F
AT1G13650	F	F	F	F	F	F	F	F	F	F	-	F	F	F	F	F	F	F	F	F	-	-	F	F	F	F	F	F	F	F	F	F	F	F	F	F	F	F	F	F	F	F	F
AT1G13660	F	F	F	F	F	F	F	F	F	F	-	F	F	F	F	F	F	F	F	F	-	-	F	F	F	F	F	F	F	F	F	F	F	F	F	F	F	F	F	F	F	F	F
AT1G13670	F	F	F	F	F	F	F	F	F	F	-	F	F	F	F	F	F	F	F	F	-	-	F	F	F	F	F	F	F	F	F	F	F	F	F	F	F	F	F	F	F	F	F
AT1G13680	F	F	F	F	F	F	F	F	F	F	-	F	F	F	F	F	F	F	F	F	-	-	F	F	F	F	F	F	F	F	F	F	F	F	F	F	F	F	F	F	F	F	F
AT1G13690	F	F	F	F	F	F	F	F	F	F	-	F	F	F	F	F	F	F	F	F	-	-	F	F	F	F	F	F	F	F	F	F	F	F	F	F	F	F	F	F	F	F	F
AT1G13700	F	F	F	F	F	F	F	F	F	F	-	F	F	F	F	F	F	F	F	F	-	-	F	F	F	F	F	F	F	F	F	F	F	F	F	F	F	F	F	F	F	F	F
AT1G13710	F	F	F	F	F	F	F	F	F	F	-	F	F	F	F	F	F	F	F	F	-	-	F	F	F	F	F	F	F	F	F	F	F	F	F	F	F	F	F	F	F	F	F
AT1G13720	F	F	F	F	F	F	F	F	F	F	-	F	F	F	F	F	F	F	F	F	-	-	F	F	F	F	F	F	F	F	F	F	F	F	F	F	F	F	F	F	F	F	F
AT1G13730	F	F	F	F	F	F	F	F	F	F	-	F	F	F	F	F	F	F	F	F	-	-	F	F	F	F	F	F	F	F	F	F	F	F	F	F	F	F	F	F	F	F	F
AT1G13740	F	F	F	F	F	F	F	F	F	F	-	F	F	F	F	F	F	F	F	F	-	-	F	F	F	F	F	F	F	F	F	F	F	F	F	F	F	F	F	F	F	F	F
AT1G13750	F	F	F	F	F	F	F	F	F	F	-	F	F	F	F	F	F	F	F	F	-	-	F	F	F	F	F	F	F	F	F	F	F	F	F	F	F	F	F	F	F	F	F
AT1G13755	F	F	F	F	F	F	F	F	F	F	-	F	F	F	F	F	F	F	F	F	-	-	F	F	F	F	F	F	F	F	F	F	F	F	F	F	F	F	F	F	F	F	F
AT1G13760	F	F	F	F	F	F	F	F	F	F	-	F	F	F	F	F	F	F	F	F	-	-	F	F	F	F	F	F	F	F	F	F	F	F	F	F	F	F	F	F	F	F	F
AT1G13770	F	F	F	F	F	F	F	F	F	F	-	F	F	F	F	F	F	F	F	F	-	-	F	F	F	F	F	F	F	F	F	F	F	F	F	F	F	F	F	F	F	F	F
AT1G13780	F	F	F	F	F	F	F	F	F	F	-	F	F	F	F	F	F	F	F	F	-	-	F	F	F	F	F	F	F	F	F	F	F	F	F	F	F	F	F	F	F	F	F
AT1G13790	F	F	F	F	F	F	F	F	F	F	-	F	F	F	F	F	F	F	F	F	-	-	F	F	F	F	F	F	F	F	F	F	F	F	F	F	F	F	F	F	F	F	F
AT1G13800	F	F	F	F	F	F	F	F	F	F	-	F	F	F	F	F	F	F	F	F	-	-	F	F	F	F	F	F	F	F	F	F	F	F	F	F	F	F	F	F	F	F	F
AT1G13810	F	F	F	F	F	F	F	F	F	F	-	F	F	F	F	F	F	F	F	F	-	-	F	F	F	F	F	F	F	F	F	F	F	F	F	F	F	F	F	F	F	F	F
AT1G13820	F	F	F	F	F	F	F	F	F	F	-	F	F	F	F	F	F	F	F	F	-	-	F	F	F	F	F	F	F	F	F	F	F	F	F	F	F	F	F	F	F	F	F
AT1G13830	F	F	F	F	F	F	F	F	F	F	-	F	F	F	F	F	F	F	F	F	-	-	F	F	F	F	F	F	F	F	F	F	F	F	F	F	F	F	F	F	F	F	F
AT1G13860	F	F	F	F	F	F	F	F	F	F	-	F	F	F	F	F	F	F	F	F	-	-	F	F	F	F	F	F	F	F	F	F	F	F	F	F	F	F	F	F	F	F	F
AT1G13870	F	F	F	F	F	F	F	F	F	F	-	F	F	F	F	F	F	F	F	F	-	-	F	F	F	F	F	F	F	F	F	F	F	F	F	F	F	F	F	F	F	F	F
AT1G13880	F	F	F	F	F	F	F	F	F	F	-	F	F	F	F	F	F	F	F	F	-	-	F	F	F	F	F	F	F	F	F	F	F	F	F	F	F	F	F	F	F	F	F
AT1G13890	F	F	F	F	F	F	F	F	F	F	-	F	F	F	F	F	F	F	F	F	-	-	F	F	F	F	F	F	F	F	F	F	F	F	F	F	F	F	F	F	F	F	F
AT1G13900	F	F	F	F	F	F	F	F	F	F	-	F	F	F	F	F	F	F	F	F	-	-	F	F	F	F	F	F	F	F	F	F	F	F	F	F	F	F	F	F	F	F	F
AT1G13910	F	F	F	F	F	F	F	F	F	F	-	F	F	F	F	F	F	F	F	F	-	-	F	F	F	F	F	F	F	F	F	F	F	F	F	F	F	F	F	F	F	F	F
AT1G13920	F	F	F	F	F	F	F	F	F	F	-	F	F	F	F	F	F	F	F	F	-	-	F	F	F	F	F	F	F	F	F	F	F	F	F	F	F	F	F	F	F	F	F
AT1G13930	F	F	F	F	F	F	F	F	F	F	-	F	F	F	F	F	F	F	F	F	-	-	F	F	F	F	F	F	F	F	F	F	F	F	F	F	F	F	F	F	F	F	F
AT1G13940	F	F	F	F	F	F	F	F	F	F	-	F	F	F	F	F	F	F	F	F	-	-	F	F	F	F	F	F	F	F	F	F	F	F	F	F	F	F	F	F	F	F	F
AT1G13950	F	F	F	F	F	F	F	F	F	F	-	F	F	F	F	F	F	F	F	F	-	-	F	F	F	F	F	F	F	F	F	F	F	F	F	F	F	F	F	F	F	F	F
AT1G13960	F	F	F	F	F	F	F	F	F	F	-	F	F	F	F	F	F	F	F	F	-	-	F	F	F	F	F	F	F	F	F	F	F	F	F	F	F	F	F	F	F	F	F
AT1G13970	F	F	F	F	F	F	F	F	F	F	-	F	F	F	F	F	F	F	F	F	-	-	F	F	F	F	F	F	F	F	F	F	F	F	F	F	F	F	F	F	F	F	F
AT1G13980	F	F	F	F	F	F	F	F	F	F	-	F	F	F	F	F	F	F	F	F	-	-	F	F	F	F	F	F	F	F	F	F	F	F	F	F	F	F	F	F	F	F	F
AT1G13990	F	F	F	F	F	F	F	F	F	F	-	F	F	F	F	F	F	F	F	F	-	-	F	F	F	F	F	F	F	F	F	F	F	F	F	F	F	F	F	F	F	F	F
AT1G14000	F	F	F	F	F	F	F	F	F	F	-	F	F	F	F	F	F	F	F	F	-	-	F	F	F	F	F	F	F	F	F	F	F	F	F	F	F	F	F	F	F	F	F
AT1G14010	F	F	F	F	F	F	F	F	F	F	-	F	F	F	F	F	F	F	F	F	-	-	F	F	F	F	F	F	F	F	F	F	F	F	F	F	F	F	F	F	F	F	F
AT1G14020	F	F	F	F	F	F	F	F	F	F	-	F	F	F	F	F	F	F	F	F	-	-	F	F	F	F	F	F	F	F	F	F	F	F	F	F	F	F	F	F	F	F	F
AT1G14030	F	F	F	F	F	F	F	F	F	F	-	F	F	F	F	F	F	F	F	F	-	-	F	F	F	F	F	F	F	F	F	F	F	F	F	F	F	F	F	F	F	F	F
AT1G14040	F	F	F	F	F	F	F	F	F	F	-	F	F	F	F	F	F	F	F	F	-	-	F	F	F	F	F	F	F	F	F	F	F	F	F	F	F	F	F	F	F	F	F
AT1G14048	F	F	F	F	F	F	F	F	F	F	-	F	F	F	F	F	F	F	F	F	-	-	F	F	F	F	F	F	F	F	F	F	F	F	F	F	F	F	F	F	F	F	F
AT1G14060	F	F	F	F	F	F	F	F	F	F	-	F	F	F	F	F	F	F	F	F	-	-	F	F	F	F	F	F	F	F	F	F	F	F	F	F	F	F	F	F	F	F	F
AT1G14070	F	F	F	F	F	F	F	F	F	F	-	F	F	F	F	F	F	F	F	F	-	-	F	F	F	F	F	F	F	F	F	F	F	F	F	F	F	F	F	F	F	F	F
AT1G14071	F	F	F	F	F	F	F	F	F	F	-	F	F	F	F	F	F	F	F	F	-	-	F	F	F	F	F	F	F	F	F	F	F	F	F	F	F	F	F	F	F	F	F
AT1G14080	F	F	F	F	F	F	F	F	F	F	-	F	F	F	F	F	F	F	F	F	-	-	F	F	F	F	F	F	F	F	F	F	F	F	F	F	F	F	F	F	F	F	F
AT1G14090	F	F	F	F	F	F	F	F	F	F	-	F	F	F	F	F	F	F	F	F	-	-	F	F	F	F	F	F	F	F	F	F	F	F	F	F	F	F	F	F	F	F	F
AT1G14100	F	F	F	F	F	F	F	F	F	F	-	F	F	F	F	F	F	F	F	F	-	-	F	F	F	F	F	F	F	F	F	F	F	F	F	F	F	F	F	F	F	F	F
AT1G14110	F	F	F	F	F	F	F	F	F	F	-	F	F	F	F	F	F	F	F	F	-	-	F	F	F	F	F	F	F	F	F	F	F	F	F	F	F	F	F	F	F	F	F
AT1G14120	F	F	F	F	F	F	F	F	F	F	-	F	F	F	F	F	F	F	F	F	-	-	F	F	F	F	F	F	F	F	F	F	F	F	F	F	F	F	F	F	F	F	F
AT1G14130	F	F	F	F	F	F	F	F	F	F	-	F	F	F	F	F	F	F	F	F	-	-	F	F	F	F	F	F	F	F	F	F	F	F	F	F	F	F	F	F	F	F	F
AT1G14140	F	F	F	F	F	F	F	F	F	F	-	F	F	F	F	F	F	F	F	F	-	-	F	F	F	F	F	F	F	F	F	F	F	F	F	F	F	F	F	F	F	F	F
AT1G14150	F	F	F	F	F	F	F	F	F	F	-	F	F	F	F	F	F	F	F	F	-	-	F	F	F	F	F	F	F	F	F	F	F	F	F	F	F	F	F	F	F	F	F
AT1G14160	F	F	F	F	F	F	F	F	F	F	-	F	F	F	F	F	F	F	F	F	-	-	F	F	F	F	F	F	F	F	F	F	F	F	F	F	F	F	F	F	F	F	F
AT1G14170	F	F	F	F	F	F	F	F	F	F	-	F	F	F	F	F	F	F	F	F	-	-	F	F	F	F	F	F	F	F	F	F	F	F	F	F	F	F	F	F	F	F	F
AT1G14180	F	F	F	F	F	F	F	F	F	F	-	F	F	F	F	F	F	F	F	F	-	-	F	F	F	F	F	F	F	F	F	F	F	F	F	F	F	F	F	F	F	F	F
AT1G14182	F	F	F	F	F	F	F	F	F	F	-	F	F	F	F	F	F	F	F	F	-	-	F	F	F	F	F	F	F	F	F	F	F	F	F	F	F	F	F	F	F	F	F
AT1G14185	F	F	F	F	F	F	F	F	F	F	-	F	F	F	F	F	F	F	F	F	-	-	F	F	F	F	F	F	F	F	F	F	F	F	F	F	F	F	F	F	F	F	F
AT1G14190	F	F	F	F	F	F	F	F	F	F	-	F	F	F	F	F	F	F	F	F	-	-	F	F	F	F	F	F	F	F	F	F	F	F	F	F	F	F	F	F	F	F	F
AT1G14200	F	F	F	F	F	F	F	F	F	F	-	F	F	F	F	F	F	F	F	F	-	-	F	F	F	F	F	F	F	F	F	F	F	F	F	F	F	F	F	F	F	F	F
AT1G14205	F	F	F	F	F	F	F	F	F	F	-	F	F	F	F	F	F	F	F	F	-	-	F	F	F	F	F	F	F	F	F	F	F	F	F	F	F	F	F	F	F	F	F
AT1G14210	F	F	F	F	F	F	F	F	F	F	-	F	F	F	F	F	F	F	F	F	-	-	F	F	F	F	F	F	F	F	F	F	F	F	F	F	F	F	F	F	F	F	F
AT1G14220	F	F	F	F	F	F	F	F	F	F	-	F	F	F	F	F	F	F	F	F	-	-	F	F	F	F	F	F	F	F	F	F	F	F	F	F	F	F	F	F	F	F	F
AT1G14225	F	F	F	F	F	F	F	F	F	F	-	F	F	F	F	F	F	F	F	F	-	-	F	F	F	F	F	F	F	F	F	F	F	F	F	F	F	F	F	F	F	F	F
AT1G14230	F	F	F	F	F	F	F	F	F	F	-	F	F	F	F	F	F	F	F	F	-	-	F	F	F	F	F	F	F	F	F	F	F	F	F	F	F	F	F	F	F	F	F
AT1G14240	F	F	F	F	F	F	F	F	F	F	-	F	F	F	F	F	F	F	F	F	-	-	F	F	F	F	F	F	F	F	F	F	F	F	F	F	F	F	F	F	F	F	F
AT1G14250	F	F	F	F	F	F	F	F	F	F	-	F	F	F	F	F	F	F	F	F	-	-	F	F	F	F	F	F	F	F	F	F	F	F	F	F	F	F	F	F	F	F	F
AT1G14260	F	F	F	F	F	F	F	F	F	F	-	F	F	F	F	F	F	F	F	F	-	-	F	F	F	F	F	F	F	F	F	F	F	F	F	F	F	F	F	F	F	F	F
AT1G14270	F	F	F	F	F	F	F	F	F	F	-	F	F	F	F	F	F	F	F	F	-	-	F	F	F	F	F	F	F	F	F	F	F	F	F	F	F	F	F	F	F	F	F
AT1G14280	F	F	F	F	F	F	F	F	F	F	-	F	F	F	F	F	F	F	F	F	-	-	F	F	F	F	F	F	F	F	F	F	F	F	F	F	F	F	F	F	F	F	F
AT1G14290	F	F	F	F	F	F	F	F	F	F	-	F	F	F	F	F	F	F	F	F	-	-	F	F	F	F	F	F	F	F	F	F	F	F	F	F	F	F	F	F	F	F	F
AT1G14300	F	F	F	F	F	F	F	F	F	F	-	F	F	F	F	F	F	F	F	F	-	-	F	F	F	F	F	F	F	F	F	F	F	F	F	F	F	F	F	F	F	F	F
AT1G14310	F	F	F	F	F	F	F	F	F	F	-	F	F	F	F	F	F	F	F	F	-	-	F	F	F	F	F	F	F	F	F	F	F	F	F	F	F	F	F	F	F	F	F
AT1G14315	F	F	F	F	F	F	F	F	F	F	-	F	F	F	F	F	F	F	F	F	-	-	F	F	F	F	F	F	F	F	F	F	F	F	F	F	F	F	F	F	F	F	F
AT1G14320	F	F	F	F	F	F	F	F	F	F	-	F	F	F	F	F	F	F	F	F	-	-	F	F	F	F	F	F	F	F	F	F	F	F	F	F	F	F	F	F	F	F	F
AT1G14330	F	F	F	F	F	F	F	F	F	F	-	F	F	F	F	F	F	F	F	F	-	-	F	F	F	F	F	F	F	F	F	F	F	F	F	F	F	F	F	F	F	F	F
AT1G14340	F	F	F	F	F	F	F	F	F	F	-	F	F	F	F	F	F	F	F	F	-	-	F	F	F	F	F	F	F	F	F	F	F	F	F	F	F	F	F	F	F	F	F
AT1G14345	F	F	F	F	F	F	F	F	F	F	-	F	F	F	F	F	F	F	F	F	-	-	F	F	F	F	F	F	F	F	F	F	F	F	F	F	F	F	F	F	F	F	F
AT1G14350	F	F	F	F	F	F	F	F	F	F	-	F	F	F	F	F	F	F	F	F	-	-	F	F	F	F	F	F	F	F	F	F	F	F	F	F	F	F	F	F	F	F	F
AT1G14360	F	F	F	F	F	F	F	F	F	F	-	F	F	F	F	F	F	F	F	F	-	-	F	F	F	F	F	F	F	F	F	F	F	F	F	F	F	F	F	F	F	F	F
AT1G14370	F	F	F	F	F	F	F	F	F	F	-	F	F	F	F	F	F	F	F	F	-	-	F	F	F	F	F	F	F	F	F	F	F	F	F	F	F	F	F	F	F	F	F
AT1G14380	F	F	F	F	F	F	F	F	F	F	-	F	F	F	F	F	F	F	F	F	-	-	F	F	F	F	T	F	F	F	F	F	F	F	F	F	F	F	F	F	F	F	F
AT1G14390	F	F	F	F	F	F	F	F	F	F	-	F	F	F	F	F	F	F	F	F	-	-	F	F	F	F	F	F	F	F	F	F	F	F	F	F	F	F	F	F	F	F	F
AT1G14400	F	F	F	F	F	F	F	F	F	F	-	F	F	F	F	F	F	F	F	F	-	-	F	F	F	F	F	F	F	F	F	F	F	F	F	F	F	F	F	F	F	F	F
AT1G14410	F	F	F	F	F	F	F	F	F	F	-	F	F	F	F	F	F	F	F	F	-	-	F	F	F	F	F	F	F	F	F	F	F	F	F	F	F	F	F	F	F	F	F
AT1G14420	F	F	F	F	F	F	F	F	F	F	-	F	F	F	F	F	F	F	F	F	-	-	F	F	F	F	F	F	F	F	F	F	F	F	F	F	F	F	F	F	F	F	F
AT1G14430	F	F	F	F	F	F	F	F	F	F	-	F	F	F	F	F	F	F	F	F	-	-	F	F	F	F	F	F	F	F	F	F	F	F	F	F	F	F	F	F	F	F	F
AT1G14440	F	F	F	F	F	F	F	F	F	F	-	F	F	F	F	F	F	F	F	F	-	-	F	F	F	F	F	F	F	F	F	F	F	F	F	F	F	F	F	F	F	F	F
AT1G14450	F	F	F	F	F	F	F	F	F	F	-	F	F	F	F	F	F	F	F	F	-	-	F	F	F	F	F	F	F	F	F	F	F	F	F	F	F	F	F	F	F	F	F
AT1G14455	F	F	F	F	F	F	F	F	F	F	-	F	F	F	F	F	F	F	F	F	-	-	F	F	F	F	F	F	F	F	F	F	F	F	F	F	F	F	F	F	F	F	F
AT1G14460	F	F	F	F	F	F	F	F	F	F	-	F	F	F	F	F	F	F	F	F	-	-	F	F	F	F	F	F	F	F	F	F	F	F	F	F	F	F	F	F	F	F	F
AT1G14470	F	F	F	F	F	F	F	F	F	F	-	F	F	F	F	F	F	F	F	F	-	-	F	F	F	F	F	F	F	F	F	F	F	F	F	F	F	F	F	F	F	F	F
AT1G14480	F	F	F	F	F	F	F	F	F	F	-	F	F	F	F	F	F	F	F	F	-	-	F	F	F	F	F	F	F	F	F	F	F	F	F	F	F	F	F	F	F	F	F
AT1G14490	F	F	F	F	F	F	F	F	F	F	-	F	F	F	F	F	F	F	F	F	-	-	F	F	F	F	F	F	F	F	F	F	F	F	F	F	F	F	F	F	F	F	F
AT1G14500	F	F	F	F	F	F	F	F	F	F	-	F	F	F	F	F	F	F	F	F	-	-	F	F	F	F	F	F	F	F	F	F	F	F	F	F	F	F	F	F	F	F	F
AT1G14510	F	F	F	F	F	F	F	F	F	F	-	F	F	F	F	F	F	F	F	F	-	-	F	F	F	F	F	F	F	F	F	F	F	F	F	F	F	F	F	F	F	F	F
AT1G14518	F	F	F	F	F	F	F	F	F	F	-	F	F	F	F	F	F	F	F	F	-	-	F	F	F	F	F	F	F	F	F	F	F	F	F	F	F	F	F	F	F	F	F
AT1G14520	F	F	F	F	F	F	F	F	F	F	-	F	F	F	F	F	F	F	F	F	-	-	F	F	F	F	F	F	F	F	F	F	F	F	F	F	F	F	F	F	F	F	F
AT1G14530	F	F	F	F	F	F	F	F	F	F	-	F	F	F	F	F	F	F	F	F	-	-	F	F	F	F	F	F	F	F	F	F	F	F	F	F	F	F	F	F	F	F	F
AT1G14540	F	F	F	F	F	F	F	F	F	F	-	F	F	F	F	F	F	F	F	F	-	-	F	F	F	F	F	F	F	F	F	F	F	F	F	F	F	F	F	F	F	F	F
AT1G14549	F	F	F	F	F	F	F	F	F	F	-	F	F	F	F	F	F	F	F	F	-	-	F	F	F	F	F	F	F	F	F	F	F	F	F	F	F	F	F	F	F	F	F
AT1G14550	F	F	F	F	F	F	F	F	F	F	-	F	F	F	F	F	F	F	F	F	-	-	F	F	F	F	F	F	F	F	F	F	F	F	F	F	F	F	F	F	F	F	F
AT1G14560	F	F	F	F	F	F	F	F	F	F	-	F	F	F	F	F	F	F	F	F	-	-	F	F	F	F	F	F	F	F	F	F	F	F	F	F	F	F	F	F	F	F	F
AT1G14570	F	F	F	F	F	F	F	F	F	F	-	F	T	F	F	F	F	F	F	F	-	-	F	F	F	F	F	F	F	F	F	F	F	F	F	F	F	F	F	F	F	F	F
AT1G14580	F	F	F	F	F	F	F	F	F	F	-	F	F	F	F	F	F	F	F	F	-	-	F	F	F	F	F	F	F	F	F	F	F	F	F	F	F	F	F	F	F	F	F
AT1G14590	F	F	F	F	F	F	F	F	F	F	-	F	F	F	F	F	F	F	F	F	-	-	F	F	F	F	F	F	F	F	F	F	F	F	F	F	F	F	F	F	F	F	F
AT1G14600	F	F	F	F	F	F	F	F	F	F	-	F	F	F	F	F	F	F	F	F	-	-	F	F	F	F	F	F	F	F	F	F	F	F	F	F	F	F	F	F	F	F	F
AT1G14610	F	F	F	F	F	F	F	F	F	F	-	F	F	F	F	F	F	F	F	F	-	-	F	F	F	F	F	F	F	F	F	F	F	F	F	F	F	F	F	F	F	F	F
AT1G14620	F	F	F	F	F	F	F	F	F	F	-	F	F	F	F	F	F	F	F	F	-	-	F	F	F	F	F	F	F	F	F	F	F	F	F	F	F	F	F	F	F	F	F
AT1G14630	F	F	F	F	F	F	F	F	F	F	-	F	F	F	F	F	F	F	F	F	-	-	F	F	F	F	F	F	F	F	F	F	F	F	F	F	F	F	F	F	F	F	F
AT1G14640	F	F	F	F	F	F	F	F	F	F	-	F	F	F	F	F	F	F	F	F	-	-	F	F	F	F	F	F	F	F	F	F	F	F	F	F	F	F	F	F	F	F	F
AT1G14650	F	F	F	F	F	F	F	F	F	F	-	F	F	F	F	F	F	F	F	F	-	-	F	F	F	F	F	F	F	F	F	F	F	F	F	F	F	F	F	F	F	F	F
AT1G14660	F	F	F	F	F	F	F	F	F	F	-	F	F	F	F	F	F	F	F	F	-	-	F	F	F	F	F	F	F	F	F	F	F	F	F	F	F	F	F	F	F	F	F
AT1G14670	F	F	F	F	F	F	F	F	F	F	-	F	F	F	F	F	F	F	F	F	-	-	F	F	F	F	F	F	F	F	F	F	F	F	F	F	F	F	F	F	F	F	F
AT1G14680	F	F	F	F	F	F	F	F	F	F	-	F	F	F	F	F	F	F	F	F	-	-	F	F	F	F	F	F	F	F	F	F	F	F	F	F	F	F	F	F	F	F	F
AT1G14685	F	F	F	F	F	F	F	F	F	F	-	F	T	F	F	F	F	F	F	F	-	-	F	F	F	F	F	F	F	F	F	F	F	F	F	F	F	F	F	F	F	F	F
AT1G14686	F	F	F	F	F	F	F	F	F	F	-	F	F	F	F	F	F	F	F	F	-	-	F	F	F	F	F	F	F	F	F	F	F	F	F	F	F	F	F	F	F	F	F
AT1G14687	F	F	F	F	F	F	F	F	F	F	-	F	F	F	F	F	F	F	F	F	-	-	F	F	F	F	F	F	F	F	F	F	F	F	F	F	F	F	F	F	F	F	F
AT1G14688	F	F	F	F	F	F	F	F	F	F	-	F	F	F	F	F	F	F	F	F	-	-	F	F	F	F	F	F	F	F	F	F	F	F	F	F	F	F	F	F	F	F	F
AT1G14690	F	F	F	F	F	F	F	F	F	F	-	F	F	F	F	F	F	F	F	F	-	-	F	F	F	F	F	F	F	F	F	F	F	F	F	F	F	F	F	F	F	F	F
AT1G14700	F	F	F	F	F	F	F	F	F	F	-	F	F	F	F	F	F	F	F	F	-	-	F	F	F	F	F	F	F	F	F	F	F	F	F	F	F	F	F	F	F	F	F
AT1G14710	F	F	F	F	F	F	F	F	F	F	-	F	F	F	F	F	F	F	F	F	-	-	F	F	F	F	F	F	F	F	F	F	F	F	F	F	F	F	F	F	F	F	F
AT1G14720	F	F	F	F	F	F	F	F	F	F	-	F	F	F	F	F	F	F	F	F	-	-	F	F	F	F	F	F	F	F	F	F	F	F	F	F	F	F	F	F	F	F	F
AT1G14730	F	F	F	F	F	F	F	F	F	F	-	F	F	F	F	F	F	F	F	F	-	-	F	F	F	F	F	F	F	F	F	F	F	F	F	F	F	F	F	F	F	F	F
AT1G14740	F	F	F	F	F	F	F	F	F	F	-	F	F	F	F	F	F	F	F	F	-	-	F	F	F	F	F	F	F	F	F	F	F	F	F	F	F	F	F	F	F	F	F
AT1G14750	F	F	F	F	F	F	F	F	F	F	-	F	F	F	F	F	F	F	F	F	-	-	F	F	F	F	F	F	F	F	F	F	F	F	F	F	F	F	F	F	F	F	F
AT1G14755	F	F	F	F	F	F	F	F	F	F	-	F	F	F	F	F	F	F	F	F	-	-	F	F	F	F	F	F	F	F	F	F	F	F	F	F	F	F	F	F	F	F	F
AT1G14760	F	F	F	F	F	F	F	F	F	F	-	F	F	F	F	F	F	F	F	F	-	-	F	F	F	F	F	F	F	F	F	F	F	F	F	F	F	F	F	F	F	F	F
AT1G14770	F	F	F	F	F	F	F	F	F	F	-	F	F	F	F	F	F	F	F	F	-	-	F	F	F	F	F	F	F	F	F	F	F	F	F	F	F	F	F	F	F	F	F
AT1G14780	F	F	F	F	F	F	F	F	F	F	-	F	F	F	F	F	F	F	F	F	-	-	F	F	F	F	F	F	F	F	F	F	F	F	F	F	F	F	F	F	F	F	F
AT1G14790	F	F	F	F	F	F	F	F	F	F	-	F	F	F	F	F	F	F	F	F	-	-	F	F	F	F	F	F	F	F	F	F	F	F	F	F	F	F	F	F	F	F	F
AT1G14800	F	F	F	F	F	F	F	F	F	F	-	F	F	F	F	F	F	F	F	F	-	-	F	F	F	F	F	F	F	F	F	F	F	F	F	F	F	F	F	F	F	F	F
AT1G14810	F	F	F	F	F	F	F	F	F	F	-	F	F	F	F	F	F	F	F	F	-	-	F	F	F	F	F	F	F	F	F	F	F	F	F	F	F	F	F	F	F	F	F
AT1G14820	F	F	F	F	F	F	F	F	F	F	-	F	F	F	F	F	F	F	F	F	-	-	F	F	F	F	F	F	F	F	F	F	F	F	F	F	F	F	F	F	F	F	F
AT1G14830	F	F	F	F	F	F	F	F	F	F	-	F	F	F	F	F	F	F	F	F	-	-	F	F	F	F	F	F	F	F	F	F	F	F	F	F	F	F	F	F	F	F	F
AT1G14840	F	F	F	F	F	F	F	F	F	F	-	F	F	F	F	F	F	F	F	F	-	-	F	F	F	F	F	F	F	F	F	F	F	F	F	F	F	F	F	F	F	F	F
AT1G14850	F	F	F	F	F	F	F	F	F	F	-	F	F	F	F	F	F	F	F	F	-	-	F	F	F	F	F	F	F	F	F	F	F	F	F	F	F	F	F	F	F	F	F
AT1G14860	F	F	F	F	F	F	F	F	F	F	-	F	F	F	F	F	F	F	F	F	-	-	F	F	F	F	F	F	F	F	F	F	F	F	F	F	F	F	F	F	F	F	F
AT1G14870	F	F	F	F	F	F	F	F	F	F	-	F	F	F	F	F	F	F	F	F	-	-	F	F	F	F	F	F	F	F	F	F	F	F	F	F	F	F	F	F	F	F	F
AT1G14880	F	F	F	F	F	F	F	F	F	F	-	F	F	F	F	F	F	F	F	F	-	-	F	F	F	F	F	F	F	F	F	F	F	F	F	F	F	F	F	F	F	F	F
AT1G14890	F	F	F	F	F	F	F	F	F	F	-	F	F	F	F	F	F	F	F	F	-	-	F	F	F	F	F	F	F	F	F	F	F	F	F	F	F	F	F	F	F	F	F
AT1G14900	F	F	F	F	F	F	F	F	F	F	-	F	F	F	F	F	F	F	F	F	-	-	F	F	F	F	F	F	F	F	F	F	F	F	F	F	F	F	F	F	F	F	F
AT1G14910	F	F	F	F	F	F	F	F	F	F	-	F	F	F	F	F	F	F	F	F	-	-	F	F	F	F	F	F	F	F	F	F	F	F	F	F	F	F	F	F	F	F	F
AT1G14920	F	F	F	F	F	F	F	F	F	F	-	F	F	F	F	F	F	F	F	F	-	-	F	F	F	F	F	F	F	F	F	F	F	F	F	F	F	F	F	F	F	F	F
AT1G14930	F	F	F	F	F	F	F	F	F	F	-	F	F	F	F	F	F	F	F	F	-	-	F	F	F	F	F	F	F	F	F	F	F	F	F	F	F	F	F	F	F	F	F
AT1G14940	F	F	F	F	F	F	F	F	F	F	-	F	F	F	F	F	F	F	F	F	-	-	F	F	F	F	F	F	F	F	F	F	F	F	F	F	F	F	F	F	F	F	F
AT1G14950	F	F	F	F	F	F	F	F	F	F	-	F	F	F	F	F	F	F	F	F	-	-	F	F	F	F	F	F	F	F	F	F	F	F	F	F	F	F	F	F	F	F	F
AT1G14960	F	F	F	F	F	F	F	F	F	F	-	F	F	F	F	F	F	F	F	F	-	-	F	F	F	F	F	F	F	F	F	F	F	F	F	F	F	F	F	F	F	F	F
AT1G14970	F	F	F	F	F	F	F	F	F	F	-	F	F	F	F	F	F	F	F	F	-	-	F	F	F	F	F	F	F	F	F	F	F	F	F	F	F	F	F	F	F	F	F
AT1G14980	F	F	F	F	F	F	F	F	F	F	-	F	F	F	F	F	F	F	F	F	-	-	F	F	F	F	F	F	F	F	F	F	F	F	F	F	F	F	F	F	F	F	F
AT1G14990	F	F	F	F	F	F	F	F	F	F	-	F	F	F	F	F	F	F	F	F	-	-	F	F	F	F	F	F	F	F	F	F	F	F	F	F	F	F	F	F	F	F	F
AT1G15000	F	F	F	F	F	F	F	F	F	F	-	F	F	F	F	F	F	F	F	F	-	-	F	F	F	F	F	F	F	F	F	F	F	F	F	F	F	F	F	F	F	F	F
AT1G15010	F	F	F	F	F	F	F	F	F	F	-	F	F	F	F	F	F	F	F	F	-	-	F	F	F	F	F	F	F	F	F	F	F	F	F	F	F	F	F	F	F	F	F
AT1G15015	F	F	F	F	F	F	F	F	F	F	-	F	F	F	F	F	F	F	F	F	-	-	F	F	F	F	F	F	F	F	F	F	F	F	F	F	F	F	F	F	F	F	F
AT1G15020	F	F	F	F	F	F	F	F	F	F	-	F	F	F	F	F	F	F	F	F	-	-	F	F	F	F	F	F	F	F	F	F	F	F	F	F	F	F	F	F	F	F	F
AT1G15030	F	F	F	F	F	F	F	F	F	F	-	F	F	F	F	F	F	F	F	F	-	-	F	F	F	F	F	F	F	F	F	F	F	F	F	F	F	F	F	F	F	F	F
AT1G15040	F	F	F	F	F	F	F	F	F	F	-	F	F	F	F	F	F	F	F	F	-	-	F	F	F	F	F	F	F	F	F	F	F	F	F	F	F	F	F	F	F	F	F
AT1G15045	F	F	F	F	F	F	F	F	F	F	-	F	F	F	F	F	F	F	F	F	-	-	F	F	F	F	F	F	F	F	F	F	F	F	F	F	F	F	F	F	F	F	F
AT1G15050	F	F	F	F	F	F	F	F	F	F	-	F	F	F	F	F	F	F	F	F	-	-	F	F	F	F	F	F	F	F	F	F	F	F	F	F	F	F	F	F	F	F	F
AT1G15060	F	F	F	F	F	F	F	F	F	F	-	F	F	F	F	F	F	F	F	F	-	-	F	F	F	F	F	F	F	F	F	F	F	F	F	F	F	F	F	F	F	F	F
AT1G15080	F	F	F	F	F	F	F	F	F	F	-	F	F	F	F	F	F	F	F	F	-	-	F	F	F	F	F	F	F	F	F	F	F	F	F	F	F	F	F	F	F	F	F
AT1G15090	F	F	F	F	F	F	F	F	F	F	-	F	F	F	F	F	F	F	F	F	-	-	F	F	F	F	F	F	F	F	F	F	F	F	F	F	F	F	F	F	F	F	F
AT1G15100	F	F	F	F	F	F	F	F	F	F	-	F	F	F	F	F	F	F	F	F	-	-	F	F	F	F	F	F	F	F	F	F	F	F	F	F	F	F	F	F	F	F	F
AT1G15110	F	F	F	F	F	F	F	F	F	F	-	F	F	F	F	F	F	F	F	F	-	-	F	F	F	F	F	F	F	F	F	F	F	F	F	F	F	F	F	F	F	F	F
AT1G15120	F	F	F	F	F	F	F	F	F	F	-	F	F	F	F	F	F	F	F	F	-	-	F	F	F	F	F	F	F	F	F	F	F	F	F	F	F	F	F	F	F	F	F
AT1G15125	F	F	F	F	F	F	F	F	F	F	-	F	F	F	F	F	F	F	F	F	-	-	F	F	F	F	F	F	F	F	F	F	F	F	F	F	F	F	F	F	F	F	F
AT1G15130	F	F	F	F	F	F	F	F	F	F	-	F	F	F	F	F	F	F	F	F	-	-	F	F	F	F	F	F	F	F	F	F	F	F	F	F	F	F	F	F	F	F	F
AT1G15140	F	F	F	F	F	F	F	F	F	F	-	F	F	F	F	F	F	F	F	F	-	-	F	F	F	F	F	F	F	F	F	F	F	F	F	F	F	F	F	F	F	F	F
AT1G15150	F	F	F	F	F	F	F	F	F	F	-	F	F	F	F	F	F	F	F	F	-	-	F	F	F	F	F	F	F	F	F	F	F	F	F	F	F	F	F	F	F	F	F
AT1G15160	F	F	F	F	F	F	F	F	F	F	-	F	F	F	F	F	F	F	F	F	-	-	F	F	F	F	F	F	F	F	F	F	F	F	F	F	F	F	F	F	F	F	F
AT1G15165	F	F	F	F	F	F	F	F	F	F	-	F	F	F	F	F	F	F	F	F	-	-	F	F	F	F	F	F	F	F	F	F	F	F	F	F	F	F	F	F	F	F	F
AT1G15170	F	F	F	F	F	F	F	F	F	F	-	F	F	F	F	F	F	F	F	F	-	-	F	F	F	F	F	F	F	F	F	F	F	F	F	F	F	F	F	F	F	F	F
AT1G15175	F	F	F	F	F	F	F	F	F	F	-	F	F	F	F	F	F	F	F	F	-	-	F	F	F	F	F	F	F	F	F	F	F	F	F	F	F	F	F	F	F	F	F
AT1G15180	F	F	F	F	F	F	F	F	F	F	-	F	F	F	F	F	F	F	F	F	-	-	F	F	F	F	F	F	F	F	F	F	F	F	F	F	F	F	F	F	F	F	F
AT1G15190	F	F	F	F	F	F	F	F	F	F	-	F	F	F	F	F	F	F	F	F	-	-	F	F	F	F	F	F	F	F	F	F	F	F	F	F	F	F	F	F	F	F	F
AT1G15200	F	F	F	F	F	F	F	F	F	F	-	F	F	F	F	F	F	F	F	F	-	-	F	F	F	F	F	F	F	F	F	F	F	F	F	F	F	F	F	F	F	F	F
AT1G15210	F	F	F	F	F	F	F	F	F	F	-	F	F	F	F	F	F	F	F	F	-	-	F	F	F	F	F	F	F	F	F	F	F	F	F	F	F	F	F	F	F	F	F
AT1G15215	F	F	F	F	F	F	F	F	F	F	-	F	F	F	F	F	F	F	F	F	-	-	F	F	F	F	F	F	F	F	F	F	F	F	F	F	F	F	F	F	F	F	F
AT1G15220	F	F	F	F	F	F	F	F	F	F	-	F	F	F	F	F	F	F	F	F	-	-	F	F	F	F	F	F	F	F	F	F	F	F	F	F	F	F	F	F	F	F	F
AT1G15230	F	F	F	F	F	F	F	F	F	F	-	F	F	F	F	F	F	F	F	F	-	-	F	F	F	F	F	F	F	F	F	F	F	F	F	F	F	F	F	F	F	F	F
AT1G15240	F	F	F	F	F	F	F	F	F	F	-	F	F	F	F	F	F	F	F	F	-	-	F	F	F	F	F	F	F	F	F	F	F	F	F	F	F	F	F	F	F	F	F
AT1G15250	F	F	F	F	F	F	F	F	F	F	-	F	F	F	F	F	F	F	F	F	-	-	F	F	F	F	F	F	F	F	F	F	F	F	F	F	F	F	F	F	F	F	F
AT1G15260	F	F	F	F	F	F	F	F	F	F	-	F	F	F	F	F	F	F	F	F	-	-	F	F	F	F	F	F	F	F	F	F	F	F	F	F	F	F	F	F	F	F	F
AT1G15270	F	F	F	F	F	F	F	F	F	F	-	F	F	F	F	F	F	F	F	F	-	-	F	F	F	F	F	F	F	F	F	F	F	F	F	F	F	F	F	F	F	F	F
AT1G15280	F	F	F	F	F	F	F	F	F	F	-	F	F	F	F	F	F	F	F	F	-	-	F	F	F	F	F	F	F	F	F	F	F	F	F	F	F	F	F	F	F	F	F
AT1G15290	F	F	F	F	F	F	F	F	F	F	-	F	F	F	F	F	F	F	F	F	-	-	F	F	F	F	F	F	F	F	F	F	F	F	F	F	F	F	F	F	F	F	F
AT1G15300	F	F	F	F	F	F	F	F	F	F	-	F	F	F	F	F	F	F	F	F	-	-	F	F	F	F	F	F	F	F	F	F	F	F	F	F	F	F	F	F	F	F	F
AT1G15310	F	F	F	F	F	F	F	F	F	F	-	F	F	F	F	F	F	F	F	F	-	-	F	F	F	F	F	F	F	F	F	F	F	F	F	F	F	F	F	F	F	F	F
AT1G15320	F	F	F	F	F	F	F	F	F	F	-	F	F	F	F	F	F	F	F	F	-	-	F	F	F	F	F	F	F	F	F	F	F	F	F	F	F	F	F	F	F	F	F
AT1G15330	F	F	F	F	F	F	F	F	F	F	-	F	F	F	F	F	F	F	F	F	-	-	F	F	F	F	F	F	F	F	F	F	F	F	F	F	F	F	F	F	F	F	F
AT1G15340	F	F	F	F	F	F	F	F	F	F	-	F	F	F	F	F	F	F	F	F	-	-	F	F	F	F	F	F	F	F	F	F	F	F	F	F	F	F	F	F	F	F	F
AT1G15350	F	F	F	F	F	F	F	F	F	F	-	F	F	F	F	F	F	F	F	F	-	-	F	F	F	F	F	F	F	F	F	F	F	F	F	F	F	F	F	F	F	F	F
AT1G15360	F	F	F	F	F	F	F	F	F	F	-	F	F	F	F	T	F	F	F	F	-	-	F	F	F	F	F	F	F	F	F	F	F	F	F	F	F	F	F	T	F	F	F
AT1G15370	F	F	F	F	F	F	F	F	F	F	-	F	F	F	F	F	F	F	F	F	-	-	F	F	F	F	F	F	F	F	F	F	F	F	F	F	F	F	F	F	F	F	F
AT1G15380	F	F	F	F	F	F	F	F	F	F	-	F	F	F	F	F	F	F	F	F	-	-	F	F	F	F	F	F	F	F	F	F	F	F	F	F	F	F	F	F	F	F	F
AT1G15385	F	F	F	F	F	F	F	F	F	F	-	F	F	F	F	F	F	F	F	F	-	-	F	F	F	F	F	F	F	F	F	F	F	F	F	F	F	F	F	F	F	F	F
AT1G15390	F	F	F	F	F	F	F	F	F	F	-	F	F	F	F	F	F	F	F	F	-	-	F	F	F	F	F	F	F	F	F	F	F	F	F	F	F	F	F	F	F	F	F
AT1G15400	F	F	F	F	F	F	F	F	F	F	-	F	F	F	F	F	F	F	F	F	-	-	F	F	F	F	F	F	F	F	F	F	F	F	F	F	F	F	F	F	F	F	F
AT1G15405	F	F	F	F	F	F	F	F	F	F	-	F	F	F	F	F	F	F	F	F	-	-	F	F	F	F	F	F	F	F	F	F	F	F	F	F	F	F	F	F	F	F	F
AT1G15410	F	F	F	F	F	F	F	F	F	F	-	F	F	F	F	F	F	F	F	F	-	-	F	F	F	F	F	F	F	F	F	F	F	F	F	F	F	F	F	F	F	F	F
AT1G15415	F	F	F	F	F	F	F	F	F	F	-	F	F	F	F	F	F	F	F	F	-	-	F	F	F	F	F	F	F	F	F	F	F	F	F	F	F	F	F	F	F	F	F
AT1G15420	F	F	F	F	F	F	F	F	F	F	-	F	F	F	F	F	F	F	F	F	-	-	F	F	F	F	F	F	F	F	F	F	F	F	F	F	F	F	F	F	F	F	F
AT1G15430	F	F	F	F	F	F	F	F	F	F	-	F	F	F	F	F	F	F	F	F	-	-	F	F	F	F	F	F	F	F	F	F	F	F	F	F	F	F	F	F	F	F	F
AT1G15440	F	F	F	F	F	F	F	F	F	F	-	F	F	F	F	F	F	F	F	F	-	-	F	F	F	F	F	F	F	F	F	F	F	F	F	F	F	F	F	F	F	F	F
AT1G15450	F	F	F	F	F	F	F	F	F	F	-	F	F	F	F	F	F	F	F	F	-	-	F	F	F	F	F	F	F	F	F	F	F	F	F	F	F	F	F	F	F	F	F
AT1G15460	F	F	F	F	F	F	F	F	F	F	-	F	F	F	F	F	F	F	F	F	-	-	F	F	F	F	F	F	F	F	F	F	F	F	F	F	F	F	F	F	F	F	F
AT1G15470	F	F	F	F	F	F	F	F	F	F	-	F	F	F	F	F	F	F	F	F	-	-	F	F	F	F	F	F	F	F	F	F	F	F	F	F	F	F	F	F	F	F	F
AT1G15480	F	F	F	F	F	F	F	F	F	F	-	F	F	F	F	F	F	F	F	F	-	-	F	F	F	F	F	F	F	F	F	F	F	F	F	F	F	F	F	F	F	F	F
AT1G15490	F	F	F	F	F	F	F	F	F	F	-	F	F	F	F	F	F	F	F	F	-	-	F	F	F	F	F	F	F	F	F	F	F	F	F	F	F	F	F	F	F	F	F
AT1G15500	F	F	F	F	F	F	F	F	F	F	-	F	F	F	F	F	F	F	F	F	-	-	F	F	F	F	F	F	F	F	F	F	F	F	F	F	F	F	F	F	F	F	F
AT1G15510	F	F	F	F	F	F	F	F	F	F	-	F	F	F	F	F	F	F	F	F	-	-	F	F	F	F	F	F	F	F	F	F	F	F	F	F	F	F	F	F	F	F	F
AT1G15520	F	F	F	F	F	F	F	F	F	F	-	F	F	F	F	F	F	F	F	F	-	-	F	F	F	F	F	F	F	F	F	F	F	F	F	F	F	F	F	T	F	F	F
AT1G15540	F	F	F	F	F	F	F	F	F	F	-	F	F	F	F	F	F	F	F	F	-	-	F	F	F	F	F	F	F	F	F	F	F	F	F	F	F	F	F	F	F	F	F
AT1G15550	F	F	F	F	F	F	F	F	F	F	-	F	F	F	F	F	F	F	F	F	-	-	F	F	F	F	F	F	F	F	F	F	F	F	F	F	F	F	F	F	F	F	F
AT1G15560	F	F	F	F	F	F	F	F	F	F	-	F	F	F	F	F	F	F	F	F	-	-	F	F	F	F	F	F	F	F	F	F	F	F	F	F	F	F	F	F	F	F	F
AT1G15570	F	F	F	F	F	F	F	F	F	F	-	F	F	F	F	F	F	F	F	F	-	-	F	F	F	F	F	F	F	F	F	F	F	F	F	F	F	F	F	F	F	F	F
AT1G15580	F	F	F	F	F	F	F	F	F	F	-	F	F	F	F	F	F	F	F	F	-	-	F	F	F	F	F	F	F	F	F	F	F	F	F	F	F	F	F	F	F	F	F
AT1G15590	F	F	F	F	F	F	F	F	F	F	-	F	F	F	F	F	F	F	F	F	-	-	F	F	F	F	F	F	F	F	F	F	F	F	F	F	F	F	F	F	F	F	F
AT1G15600	F	F	F	F	F	F	F	F	F	F	-	F	F	F	F	F	F	F	F	F	-	-	F	F	F	F	F	F	F	F	F	F	F	F	F	F	F	F	F	F	F	F	F
AT1G15610	F	F	F	F	F	F	F	F	F	F	-	F	F	F	F	F	F	F	F	F	-	-	F	F	F	F	F	F	F	F	F	F	F	F	F	F	F	F	F	F	F	F	F
AT1G15620	F	F	F	F	F	F	F	F	F	F	-	F	F	F	F	F	F	F	F	F	-	-	F	F	F	F	F	F	F	F	F	F	F	F	F	F	F	F	F	F	F	F	F
AT1G15630	F	F	F	F	F	F	F	F	F	F	-	F	F	F	F	F	F	F	F	F	-	-	F	F	F	F	F	F	F	F	F	F	F	F	F	F	F	F	F	F	F	F	F
AT1G15640	F	F	F	F	F	F	F	F	F	F	-	F	F	F	F	F	F	F	F	F	-	-	F	F	F	F	F	F	F	F	F	F	F	F	F	F	F	F	F	F	F	F	F
AT1G15650	F	F	F	F	F	F	F	F	F	F	-	F	F	F	F	F	F	F	F	F	-	-	F	F	F	F	F	F	F	F	F	F	F	F	F	F	F	F	F	F	F	F	F
AT1G15660	F	F	F	F	F	F	F	F	F	F	-	F	F	F	F	F	F	F	F	F	-	-	F	F	F	F	F	F	F	F	F	F	F	F	F	F	F	F	F	F	F	F	F
AT1G15670	F	F	F	F	F	F	F	F	F	F	-	F	F	F	F	F	F	F	F	F	-	-	F	F	F	F	F	F	F	F	F	F	F	F	F	F	F	F	F	F	F	F	F
AT1G15680	F	F	F	F	F	F	F	F	F	F	-	F	F	F	F	F	F	F	F	F	-	-	F	F	F	F	F	F	F	F	F	F	F	F	F	F	F	F	F	F	F	F	F
AT1G15690	F	F	F	F	F	F	F	F	F	F	-	F	F	F	F	F	F	F	F	F	-	-	F	F	F	F	F	F	F	F	F	F	F	F	F	F	F	F	F	F	F	F	F
AT1G15700	F	F	F	F	F	F	F	F	F	F	-	F	F	F	F	F	F	F	F	F	-	-	F	F	F	F	F	F	F	F	F	F	F	F	F	F	F	F	F	F	F	F	F
AT1G15710	F	F	F	F	F	F	F	F	F	F	-	F	F	F	F	F	F	F	F	F	-	-	F	F	F	F	F	F	F	F	F	F	F	F	F	F	F	F	F	F	F	F	F
AT1G15720	F	F	F	F	F	F	F	F	F	F	-	F	F	F	F	F	F	F	F	F	-	-	F	F	F	F	F	F	F	F	F	F	F	F	F	F	F	F	F	F	F	F	F
AT1G15730	F	F	F	F	F	F	F	F	F	F	-	F	F	F	F	F	F	F	F	F	-	-	F	F	F	F	F	F	F	F	F	F	F	F	F	F	F	F	F	F	F	F	F
AT1G15740	F	F	F	F	F	F	F	F	F	F	-	F	F	F	F	F	T	F	F	F	-	-	F	F	F	F	F	F	F	F	F	F	F	F	F	F	F	F	F	F	T	F	F
AT1G15750	F	F	F	F	F	F	F	F	F	F	-	F	F	F	F	F	F	F	F	F	-	-	F	F	F	F	F	F	F	F	F	F	F	F	F	F	F	F	F	F	F	F	F
AT1G15757	F	F	F	F	F	F	F	F	F	F	-	F	F	F	F	F	F	F	F	F	-	-	F	F	F	F	F	F	F	F	F	F	F	F	F	F	F	F	F	F	F	F	F
AT1G15760	F	F	F	F	F	F	F	F	F	F	-	F	F	F	F	F	F	F	F	F	-	-	F	F	F	F	F	F	F	F	F	F	F	F	F	F	F	F	F	F	F	F	F
AT1G15770	F	F	F	F	F	F	F	F	F	F	-	F	F	F	F	F	F	F	F	T	-	-	F	F	F	F	F	F	F	F	F	F	F	F	F	F	F	F	F	F	F	F	F
AT1G15772	F	F	F	F	F	F	F	F	F	F	-	F	F	F	F	F	F	F	F	T	-	-	F	F	F	F	F	F	F	F	F	F	F	F	F	F	F	F	F	F	F	F	F
AT1G15780	F	F	F	F	F	F	F	F	F	F	-	F	F	F	F	F	F	F	F	T	-	-	F	F	F	F	F	F	F	F	F	F	F	F	F	F	F	F	F	F	F	F	F
AT1G15790	F	F	F	F	F	F	F	F	F	F	-	F	F	F	F	F	F	F	F	T	-	-	F	F	F	F	F	F	F	F	F	F	F	F	F	F	F	F	F	F	F	F	F
AT1G15800	F	F	F	F	F	F	F	F	F	F	-	F	F	F	F	F	F	F	F	F	-	-	F	F	F	F	F	F	F	F	F	F	F	F	F	F	F	F	F	F	F	F	F
AT1G15810	F	F	F	F	F	F	F	F	F	F	-	F	F	F	F	F	F	F	F	F	-	-	F	F	F	F	F	F	F	F	F	F	F	F	F	F	F	F	F	F	F	F	F
AT1G15820	F	F	F	F	F	F	F	F	F	F	-	F	F	F	F	F	F	F	F	F	-	-	F	F	F	F	F	F	F	F	F	F	F	F	F	F	F	F	F	F	F	F	F
AT1G15825	F	F	F	F	F	F	F	F	F	F	-	F	F	F	F	F	F	F	F	F	-	-	F	F	F	F	F	F	F	F	F	F	F	F	F	F	F	F	F	F	F	F	F
AT1G15830	F	F	F	F	F	F	F	F	F	F	-	F	F	F	F	F	F	F	F	F	-	-	F	F	F	F	F	F	F	F	F	F	F	F	F	F	F	F	F	F	F	F	F
AT1G15840	F	F	F	F	F	F	F	F	F	F	-	F	F	F	F	F	F	F	F	F	-	-	F	F	F	F	F	F	F	F	F	F	F	F	F	F	F	F	F	F	F	F	F
AT1G15850	F	F	F	F	F	F	F	F	F	F	-	F	F	F	F	F	F	F	F	F	-	-	F	F	F	F	F	F	F	F	F	F	F	F	F	F	F	F	F	F	F	F	F
AT1G15860	F	F	F	F	F	F	F	F	F	F	-	F	F	F	F	F	F	F	F	F	-	-	F	F	F	F	F	F	F	F	F	F	F	F	F	F	F	F	F	F	F	F	F
AT1G15870	F	F	F	F	F	F	F	F	F	F	-	F	F	F	F	F	F	F	F	F	-	-	F	F	F	F	F	F	F	F	F	F	F	F	F	F	F	F	F	F	F	F	F
AT1G15880	F	F	F	F	F	F	F	F	F	F	-	F	F	F	F	F	F	F	F	F	-	-	F	F	F	F	F	F	F	F	F	F	F	F	F	F	F	F	F	F	F	F	F
AT1G15885	F	F	F	F	F	F	F	F	F	F	-	F	F	F	F	F	F	F	F	F	-	-	F	F	F	F	F	F	F	F	F	F	F	F	F	F	F	F	F	F	F	F	F
AT1G15890	F	F	F	F	F	F	F	F	F	F	-	F	F	F	F	F	F	F	F	F	-	-	F	F	F	F	F	F	F	F	F	F	F	F	F	F	F	F	F	F	F	F	F
AT1G15900	F	F	F	F	F	F	F	F	F	F	-	F	F	F	F	F	F	F	F	F	-	-	F	F	F	F	F	F	F	F	F	F	F	F	F	F	F	F	F	F	F	F	F
AT1G15910	F	F	F	F	F	F	F	T	F	F	-	F	F	F	F	F	F	F	F	F	-	-	F	F	F	F	F	F	F	F	F	F	F	F	F	F	F	F	F	F	F	F	F
AT1G15920	F	F	F	F	F	F	F	F	F	F	-	F	F	F	F	F	F	F	F	F	-	-	F	F	F	F	F	F	F	F	F	F	F	F	F	F	F	F	F	F	F	F	F
AT1G15930	F	F	F	F	F	F	F	F	F	F	-	F	F	F	F	F	F	F	F	F	-	-	F	F	F	F	F	F	F	F	F	F	F	F	F	F	F	F	F	F	F	F	F
AT1G15940	F	F	F	F	F	F	F	F	F	F	-	F	F	F	F	F	F	F	F	F	-	-	F	F	F	F	F	F	F	F	F	F	F	F	F	F	F	F	F	F	F	F	F
AT1G15950	F	F	F	F	F	F	F	F	F	F	-	F	F	F	F	F	F	F	F	F	-	-	F	F	F	F	F	F	F	F	F	F	F	F	F	F	F	F	F	F	F	F	F
AT1G15960	F	F	F	F	F	F	F	F	F	F	-	F	F	F	F	F	F	F	F	F	-	-	F	F	F	F	F	F	F	F	F	F	F	F	F	F	F	F	F	F	F	F	F
AT1G15970	F	F	F	F	F	F	F	F	F	F	-	F	F	F	F	F	F	F	F	F	-	-	F	F	F	F	F	F	F	F	F	F	F	F	F	F	F	F	F	F	F	F	F
AT1G15980	F	F	F	F	F	F	F	F	F	F	-	F	F	F	F	F	F	F	F	F	-	-	F	F	F	F	F	F	F	F	F	F	F	F	F	F	F	F	F	F	F	F	F
AT1G15990	F	F	F	F	F	F	F	F	F	F	-	F	F	F	F	F	F	F	F	F	-	-	F	F	F	F	F	F	F	F	F	F	F	F	F	F	F	F	F	F	F	F	F
AT1G16000	F	F	F	F	F	F	F	F	F	F	-	F	F	F	F	F	F	F	F	F	-	-	F	F	F	F	F	F	F	F	F	F	F	F	F	F	F	F	F	F	F	F	F
AT1G16010	F	F	F	F	F	F	F	F	F	F	-	F	F	F	F	F	F	F	F	F	-	-	F	F	F	F	F	F	F	F	F	F	F	F	F	F	F	F	F	F	F	F	F
AT1G16020	F	F	F	F	F	F	F	F	F	F	-	F	F	F	F	F	F	F	F	F	-	-	F	F	F	F	F	F	F	F	F	F	F	F	F	F	F	F	F	F	F	F	F
AT1G16022	F	F	F	F	F	F	F	F	F	F	-	F	F	F	F	F	F	F	F	F	-	-	F	F	F	F	F	F	F	F	F	F	F	F	F	F	F	F	F	F	F	F	F
AT1G16025	F	F	F	F	F	F	F	F	F	F	-	F	F	F	F	F	F	F	F	F	-	-	F	F	F	F	F	F	F	F	F	F	F	F	F	F	F	F	F	F	F	F	F
AT1G16030	F	F	F	F	F	F	F	F	F	F	-	F	F	F	F	F	F	F	F	F	-	-	F	F	F	F	F	F	F	F	F	F	F	F	F	F	F	F	F	F	F	F	F
AT1G16040	F	F	F	F	F	F	F	F	F	F	-	F	F	F	F	F	F	F	F	F	-	-	F	F	F	F	F	F	F	F	F	F	F	F	F	F	F	F	F	F	F	F	F
AT1G16060	F	F	F	F	F	F	F	F	F	F	-	F	F	F	F	F	F	F	F	F	-	-	F	F	F	F	F	F	F	F	F	F	F	F	F	F	F	F	F	F	F	F	F
AT1G16070	F	F	F	F	F	F	F	F	F	F	-	F	F	F	F	F	F	F	F	F	-	-	F	F	F	F	F	F	F	F	F	F	F	F	F	F	F	F	F	F	F	F	F
AT1G16080	F	F	F	F	F	F	F	F	F	F	-	F	F	F	F	F	F	F	F	F	-	-	F	F	F	F	F	F	F	F	F	F	F	F	F	F	F	F	F	F	F	F	F
AT1G16090	F	F	F	F	F	F	F	F	F	F	-	F	F	F	F	F	F	F	F	F	-	-	F	F	F	F	F	F	F	F	F	F	F	F	F	F	F	F	F	F	F	F	F
AT1G16110	F	F	F	F	F	F	F	F	F	F	-	F	F	F	F	F	F	F	F	F	-	-	F	F	F	F	F	F	F	F	F	F	F	F	F	F	F	F	F	F	F	F	F
AT1G16120	F	F	F	F	F	F	F	F	F	F	-	F	F	F	F	F	F	F	F	F	-	-	F	F	F	F	F	F	F	F	F	F	F	F	F	F	F	F	F	F	F	F	F
AT1G16130	F	F	F	F	F	F	F	F	F	F	-	F	F	F	F	F	F	F	F	F	-	-	F	F	F	F	F	F	F	F	F	F	F	F	F	F	F	F	F	F	F	F	F
AT1G16140	F	F	F	F	F	F	F	F	F	F	-	F	F	F	F	F	F	F	F	F	-	-	F	F	F	F	F	F	F	F	F	F	F	F	F	F	F	F	F	F	F	F	F
AT1G16150	F	F	F	F	F	F	F	F	F	F	-	F	F	F	F	F	F	F	F	F	-	-	F	F	F	F	F	F	F	F	F	F	F	F	F	F	F	F	F	F	F	F	F
AT1G16160	F	F	F	F	F	F	F	F	F	F	-	F	F	F	F	F	F	F	F	F	-	-	F	F	F	F	F	F	F	F	F	F	F	F	F	F	F	F	F	F	F	F	F
AT1G16170	F	F	F	F	F	F	F	F	F	F	-	F	F	F	F	F	F	F	F	F	-	-	F	F	F	F	F	F	F	F	F	F	F	F	F	F	F	F	F	F	F	F	F
AT1G16180	F	F	F	F	F	F	F	F	F	F	-	F	F	F	F	F	F	F	F	F	-	-	F	F	F	F	F	F	F	F	F	F	F	F	F	F	F	F	F	F	F	F	F
AT1G16190	F	F	F	F	F	F	F	F	F	F	-	F	F	F	F	F	F	F	F	F	-	-	F	F	F	F	F	F	F	F	F	F	F	F	F	F	F	F	F	F	F	F	F
AT1G16210	F	F	F	F	F	F	F	F	F	F	-	F	F	F	F	F	F	F	F	F	-	-	F	F	F	F	F	F	F	F	F	F	F	F	F	F	F	F	F	F	F	F	F
AT1G16220	F	F	F	F	F	F	F	F	F	F	-	F	F	F	F	F	F	F	F	F	-	-	F	F	F	F	F	F	F	F	F	F	F	F	F	F	F	F	F	F	F	F	F
AT1G16225	F	F	F	F	F	F	F	F	F	F	-	F	F	F	F	F	F	F	F	F	-	-	F	F	F	F	F	F	F	F	F	F	F	F	F	F	F	F	F	F	F	F	F
AT1G16230	F	F	F	F	F	F	F	F	F	F	-	F	F	F	F	F	F	F	F	F	-	-	F	F	F	F	F	F	F	F	F	F	F	F	F	F	F	F	F	F	F	F	F
AT1G16240	F	F	F	F	F	F	F	F	F	F	-	F	F	F	F	F	F	F	F	F	-	-	F	F	F	F	F	F	F	F	F	F	F	F	F	F	F	F	F	F	F	F	F
AT1G16250	F	F	F	F	F	F	F	F	F	F	-	F	F	F	F	F	F	F	F	F	-	-	F	F	F	F	F	F	F	F	F	F	F	F	F	F	F	F	F	F	F	F	F
AT1G16260	F	F	F	F	F	F	F	F	F	F	-	F	F	F	F	F	F	F	F	F	-	-	F	F	F	F	F	F	F	F	F	F	F	F	F	F	F	F	F	F	F	F	F
AT1G16270	F	F	F	F	F	F	F	F	F	F	-	F	F	F	F	F	F	F	F	F	-	-	F	F	F	F	F	F	F	F	F	F	F	F	F	F	F	F	F	F	F	F	F
AT1G16280	F	F	F	F	F	F	F	F	F	F	-	F	F	F	F	F	F	F	F	F	-	-	F	F	F	F	F	F	F	F	F	F	F	F	F	F	F	F	F	F	F	F	F
AT1G16290	F	F	F	F	F	F	F	F	F	F	-	F	F	F	F	F	F	F	F	F	-	-	F	F	F	F	F	F	F	F	F	F	F	F	F	F	F	F	F	F	F	F	F
AT1G16300	F	F	F	F	F	F	F	F	F	F	-	F	F	F	F	F	F	F	F	F	-	-	F	F	F	F	F	F	F	F	F	F	F	F	F	F	F	F	F	F	F	F	F
AT1G16310	F	F	F	F	F	F	F	F	F	F	-	F	F	F	F	F	F	F	F	F	-	-	F	F	F	F	F	F	F	F	F	F	F	F	F	F	F	F	F	F	F	F	F
AT1G16320	F	F	F	F	F	F	F	F	F	F	-	F	F	F	F	F	F	F	F	F	-	-	F	F	F	F	F	F	F	F	F	F	F	F	F	F	F	F	F	F	F	F	F
AT1G16330	F	F	F	F	F	F	F	F	F	F	-	F	F	F	F	F	F	F	F	F	-	-	F	F	F	F	F	F	F	F	F	F	F	F	F	F	F	F	F	F	F	F	F
AT1G16340	F	F	F	F	F	F	F	F	F	F	-	F	F	F	F	F	F	F	F	F	-	-	F	F	F	F	F	F	F	F	F	F	F	F	F	F	F	F	F	F	F	F	F
AT1G16350	F	F	F	F	F	F	F	F	F	F	-	F	F	F	F	F	F	F	F	F	-	-	F	F	F	F	F	F	F	F	F	F	F	F	F	F	F	F	F	F	F	F	F
AT1G16360	F	F	F	F	F	F	F	F	F	F	-	F	F	F	F	F	F	F	F	F	-	-	F	F	F	F	F	F	F	F	F	F	F	F	F	F	F	F	F	F	F	F	F
AT1G16370	F	F	F	F	F	F	F	F	F	F	-	F	F	F	F	F	F	F	F	F	-	-	F	F	F	F	F	F	F	F	F	F	F	F	F	F	F	F	F	F	F	F	F
AT1G16380	F	F	F	F	F	F	F	F	F	F	-	F	F	F	F	F	F	F	F	F	-	-	F	F	F	F	F	F	F	F	F	F	F	F	F	F	F	F	F	F	F	F	F
AT1G16390	F	F	F	F	F	F	F	F	F	F	-	F	F	F	F	F	F	F	F	F	-	-	F	F	F	F	F	F	F	F	F	F	F	F	F	F	F	F	F	F	F	F	F
AT1G16400	F	F	F	F	F	F	F	F	F	F	-	F	F	F	F	F	F	F	F	F	-	-	F	F	F	F	F	F	F	F	F	F	F	F	F	F	F	F	F	F	F	F	F
AT1G16410	F	F	F	F	F	F	F	F	F	F	-	F	F	F	F	F	F	F	F	F	-	-	F	F	F	F	F	F	F	F	F	F	F	F	F	F	F	F	F	F	F	F	F
AT1G16420	F	F	F	F	F	F	F	F	F	F	-	F	F	F	F	F	F	F	F	F	-	-	F	F	F	F	F	F	F	F	F	F	F	F	F	F	F	F	F	F	F	F	F
AT1G16430	F	F	F	F	F	F	F	F	F	F	-	F	F	F	F	F	F	F	F	F	-	-	F	F	F	F	F	F	F	F	F	F	F	F	F	F	F	F	F	F	F	F	F
AT1G16440	F	F	F	F	F	F	F	F	F	F	-	F	F	F	F	F	F	F	F	F	-	-	F	F	F	F	F	F	F	F	F	F	F	F	F	F	F	F	F	F	F	F	F
AT1G16445	F	F	F	F	F	F	F	F	F	F	-	F	F	F	F	F	F	F	F	F	-	-	F	F	F	F	F	F	F	F	F	F	F	F	F	F	F	F	F	F	F	F	F
AT1G16450	F	F	F	F	F	F	F	F	F	F	-	F	F	F	F	F	F	F	F	F	-	-	F	F	F	F	F	F	F	F	F	F	F	F	F	F	F	F	F	F	F	F	F
AT1G16460	F	F	F	F	F	F	F	F	F	F	-	F	F	F	F	F	F	F	F	F	-	-	F	F	F	F	F	F	F	F	F	F	F	F	F	F	F	F	F	F	F	F	F
AT1G16470	F	F	F	F	F	F	F	F	F	F	-	F	F	F	F	F	F	F	F	F	-	-	F	F	F	F	F	F	F	F	F	F	F	F	F	F	F	F	F	F	F	F	F
AT1G16480	F	F	F	F	F	F	F	F	F	F	-	F	F	F	F	F	F	F	F	F	-	-	F	F	F	F	F	F	F	F	F	F	F	F	F	F	F	F	F	F	F	F	F
AT1G16489	F	F	F	F	F	F	F	F	F	F	-	F	F	F	F	F	F	F	F	F	-	-	F	F	F	F	F	F	F	F	F	F	F	F	F	F	F	F	F	F	F	F	F
AT1G16490	F	F	F	F	F	F	F	F	F	F	-	F	F	F	F	F	F	F	F	F	-	-	F	F	F	F	F	F	F	F	F	F	F	F	F	F	F	F	F	F	F	F	F
AT1G16500	F	F	F	F	F	F	F	F	F	F	-	F	F	F	F	F	F	F	F	F	-	-	F	F	F	F	F	F	F	F	F	F	F	F	F	F	F	F	F	F	F	F	F
AT1G16510	F	F	F	F	F	F	F	F	F	F	-	F	F	F	F	F	F	F	F	F	-	-	F	F	F	F	F	F	F	F	F	F	F	F	F	F	F	F	F	F	F	F	F
AT1G16515	F	F	F	F	F	F	F	F	F	F	-	F	F	F	F	F	F	F	F	F	-	-	F	F	F	F	F	F	F	F	F	F	F	F	F	F	F	F	F	F	F	F	F
AT1G16520	F	F	F	F	F	F	F	F	F	F	-	F	F	F	F	F	F	F	F	F	-	-	F	F	F	F	F	F	F	F	F	F	F	F	F	F	F	F	F	F	F	F	F
AT1G16530	F	F	F	F	F	F	F	F	F	F	-	F	F	F	F	F	F	F	F	F	-	-	F	F	F	F	F	F	F	F	F	F	F	F	F	F	F	F	F	F	F	F	F
AT1G16540	F	F	F	F	F	F	F	F	F	F	-	F	F	F	F	F	F	F	F	F	-	-	F	F	F	F	F	F	F	F	F	F	F	F	F	F	F	F	F	F	F	F	F
AT1G16550	F	F	F	F	F	F	F	F	F	F	-	F	F	F	F	F	F	F	F	F	-	-	F	F	F	F	F	F	F	F	F	F	F	F	F	F	F	F	F	F	F	F	F
AT1G16560	F	F	F	F	F	F	F	F	F	F	-	F	F	F	F	F	F	F	F	F	-	-	F	F	F	F	F	F	F	F	F	F	F	F	F	F	F	F	F	F	F	F	F
AT1G16570	F	F	F	F	F	F	F	F	F	F	-	F	F	F	F	F	F	F	F	F	-	-	F	F	F	F	F	F	F	F	F	F	F	F	F	F	F	F	F	F	F	F	F
AT1G16590	F	F	F	F	F	F	F	F	F	F	-	F	F	F	F	F	F	F	F	F	-	-	F	F	F	F	F	F	F	F	F	F	F	F	F	F	F	F	F	F	F	F	F
AT1G16600	F	F	F	F	F	F	F	F	F	F	-	F	F	F	F	F	F	F	F	F	-	-	F	F	F	F	F	F	F	F	F	F	F	F	F	F	F	F	F	F	F	F	F
AT1G16610	F	F	F	F	F	F	F	F	F	F	-	F	F	F	F	F	F	F	F	F	-	-	F	F	F	F	F	F	F	F	F	F	F	F	F	F	F	F	F	F	F	F	F
AT1G16630	F	F	F	F	F	F	F	F	F	F	-	F	F	F	F	F	F	F	F	F	-	-	F	F	F	F	F	F	F	F	F	F	F	F	F	F	F	F	F	F	F	F	F
AT1G16640	F	F	F	F	F	F	F	F	F	F	-	F	F	F	F	F	F	F	F	F	-	-	F	F	F	F	F	F	F	F	F	F	F	F	F	F	F	F	F	F	F	F	F
AT1G16650	F	F	F	F	F	F	F	F	F	F	-	F	F	F	F	F	F	F	F	F	-	-	F	F	F	F	F	F	F	F	F	F	F	F	F	F	F	F	F	F	F	F	F
AT1G16660	F	F	F	F	F	F	F	F	F	F	-	F	F	F	F	F	F	F	F	F	-	-	F	F	F	F	F	F	F	F	F	F	F	F	F	F	F	F	F	F	F	F	F
AT1G16670	F	F	F	F	F	F	F	F	F	F	-	F	F	F	F	F	F	F	F	F	-	-	F	F	F	F	F	F	F	F	F	F	F	F	F	T	F	F	F	F	F	F	F
AT1G16680	F	F	F	F	F	F	F	F	F	F	-	F	F	F	F	F	F	F	F	F	-	-	F	F	F	F	F	F	F	F	F	F	F	F	F	F	F	F	F	F	F	F	F
AT1G16690	F	F	F	F	F	F	F	F	F	F	-	F	F	F	F	F	F	F	F	F	-	-	F	F	F	F	F	F	F	F	F	F	F	F	F	F	F	F	F	F	F	F	F
AT1G16700	F	F	F	F	F	F	F	F	F	F	-	F	F	F	F	F	F	F	F	F	-	-	F	F	F	F	F	F	F	F	F	F	F	F	F	F	F	F	F	F	F	F	F
AT1G16705	F	F	F	F	F	F	F	F	F	F	-	F	F	F	F	F	F	F	F	F	-	-	F	F	F	F	F	F	F	F	F	F	F	F	F	F	F	F	F	F	F	F	F
AT1G16710	F	F	F	F	F	F	F	F	F	F	-	F	F	F	F	F	F	F	F	F	-	-	F	F	F	F	F	F	F	F	F	F	F	F	F	F	F	F	F	F	F	F	F
AT1G16720	F	F	F	F	F	F	F	F	F	F	-	F	F	F	F	F	F	F	F	F	-	-	F	F	F	F	F	F	F	F	F	F	F	F	F	F	F	F	F	F	F	F	F
AT1G16730	F	F	F	F	F	F	F	F	F	F	-	F	F	F	F	F	F	F	F	F	-	-	F	F	F	F	F	F	F	F	F	F	F	F	F	F	F	F	F	F	F	F	F
AT1G16740	F	F	F	F	F	F	F	F	F	F	-	F	F	F	F	F	F	F	F	F	-	-	F	F	F	F	F	F	F	F	F	F	F	F	F	F	F	F	F	F	F	F	F
AT1G16750	F	F	F	F	F	F	F	F	F	F	-	F	F	F	F	F	F	F	F	F	-	-	F	F	F	F	F	F	F	F	F	F	F	F	F	F	F	F	F	F	F	F	F
AT1G16760	F	F	F	F	F	F	F	F	F	F	-	F	F	F	F	F	F	F	F	F	-	-	F	F	F	F	F	F	F	F	F	F	F	F	F	F	F	F	F	F	F	F	F
AT1G16770	F	F	F	F	F	F	F	F	F	F	-	F	F	F	F	F	F	F	F	F	-	-	F	F	F	F	F	F	F	F	F	F	F	F	F	F	F	F	F	F	F	F	F
AT1G16780	F	F	F	F	F	F	F	F	F	F	-	F	F	F	F	F	F	F	F	F	-	-	F	F	F	F	F	F	F	F	F	F	F	F	F	F	F	F	F	F	F	F	F
AT1G16790	F	F	F	F	F	F	F	F	F	F	-	F	F	F	F	F	F	F	F	F	-	-	F	F	F	F	F	F	F	F	F	F	F	F	F	F	F	F	F	F	F	F	F
AT1G16800	F	F	F	F	F	F	F	F	F	F	-	F	F	F	F	F	F	F	F	F	-	-	F	F	F	F	F	F	F	F	F	F	F	F	F	F	F	F	F	F	F	F	F
AT1G16810	F	F	F	F	F	F	F	F	F	F	-	F	F	F	F	F	F	F	F	F	-	-	F	F	F	F	F	F	F	F	F	F	F	F	F	F	F	F	F	F	F	F	F
AT1G16820	F	F	F	F	F	F	F	F	F	F	-	F	F	F	F	F	F	F	F	F	-	-	F	F	F	F	F	F	F	F	F	F	F	F	F	F	F	F	F	F	F	F	F
AT1G16830	F	F	F	F	F	F	F	F	F	F	-	F	F	F	F	F	F	F	F	F	-	-	F	F	F	F	F	F	F	F	F	F	F	F	F	F	F	F	F	F	F	F	F
AT1G16840	F	F	F	F	F	F	F	F	F	F	-	F	F	F	F	F	F	F	F	F	-	-	F	F	F	F	F	F	F	F	F	F	F	F	F	F	F	F	F	F	F	F	F
AT1G16850	F	F	F	F	F	F	F	F	F	F	-	F	F	F	F	F	F	F	F	F	-	-	F	F	F	F	F	F	F	F	F	F	F	F	F	F	F	F	F	F	F	F	F
AT1G16858	F	F	F	F	F	F	F	F	F	F	-	F	F	T	F	F	F	F	F	F	-	-	F	F	F	F	F	F	F	F	F	F	F	F	F	T	T	F	F	F	F	F	F
AT1G16860	F	F	F	F	F	F	F	F	F	F	-	F	F	T	F	F	F	F	F	F	-	-	F	F	F	F	F	F	F	F	F	F	F	F	F	T	T	F	F	F	F	F	F
AT1G16870	F	F	F	F	F	F	F	F	F	F	-	F	F	T	F	F	F	F	F	F	-	-	F	F	F	F	F	F	F	F	F	F	F	F	F	T	T	F	F	F	F	F	F
AT1G16880	F	F	F	F	F	F	F	F	F	F	-	F	F	T	F	F	F	F	F	F	-	-	F	F	F	F	F	F	F	F	F	F	F	F	F	T	T	F	F	F	F	F	F
AT1G16890	F	F	F	F	F	F	F	F	F	F	-	F	F	T	F	F	F	F	F	F	-	-	F	F	F	F	F	F	F	F	F	F	F	F	F	T	T	F	F	F	F	F	F
AT1G16900	F	F	F	F	F	F	F	F	F	F	-	F	F	T	F	F	F	F	F	F	-	-	F	F	F	F	F	F	F	F	F	F	F	F	F	T	T	F	F	F	F	F	F
AT1G16905	F	F	F	F	F	F	F	F	F	F	-	F	F	F	F	F	F	F	F	F	-	-	F	F	F	F	F	F	F	F	F	F	F	F	F	F	F	F	F	F	F	F	F
AT1G16910	F	F	F	F	F	F	F	F	F	F	-	F	F	F	F	F	F	F	F	F	-	-	F	F	F	F	F	F	F	F	F	F	F	F	F	F	F	F	F	F	F	F	F
AT1G16916	F	F	F	F	F	F	F	F	F	F	-	F	F	F	F	F	F	F	F	F	-	-	F	F	F	F	F	F	F	F	F	F	F	F	F	F	F	F	F	F	F	F	F
AT1G16920	F	F	F	F	F	F	F	F	F	F	-	F	F	F	F	F	F	F	F	F	-	-	F	F	F	F	F	F	F	F	F	F	F	F	F	F	F	F	F	F	F	F	F
AT1G16930	F	F	F	F	F	F	F	F	F	F	-	F	F	F	F	F	F	F	F	F	-	-	F	F	F	F	F	F	F	F	F	F	F	F	F	F	F	F	F	F	F	F	F
AT1G16940	F	F	F	F	F	F	F	F	F	F	-	F	F	F	F	F	F	F	F	F	-	-	F	F	F	F	F	F	F	F	F	F	F	F	F	F	F	F	F	F	F	F	F
AT1G16950	F	F	F	F	F	F	F	F	F	F	-	F	F	F	F	F	F	F	F	F	-	-	F	F	F	F	F	F	F	F	F	F	F	F	F	F	F	F	F	F	F	F	F
AT1G16960	F	F	F	F	F	F	F	F	F	F	-	F	F	F	F	F	F	F	F	F	-	-	F	F	F	F	F	F	F	F	F	F	F	F	F	F	F	F	F	F	F	F	F
AT1G16970	F	F	F	F	F	F	F	F	F	F	-	F	F	F	F	F	F	F	F	F	-	-	F	F	F	F	F	F	F	F	F	F	F	F	F	F	F	F	F	F	F	F	F
AT1G16980	F	F	F	F	F	F	F	F	F	F	-	F	F	F	F	F	F	F	F	F	-	-	F	F	F	F	F	F	F	F	F	F	F	F	F	F	F	F	F	F	F	F	F
AT1G17000	F	F	F	F	F	F	F	F	F	F	-	F	F	F	F	F	F	F	F	F	-	-	F	F	F	F	F	F	F	F	F	F	F	F	F	F	F	F	F	F	F	F	F
AT1G17010	F	F	F	F	F	F	F	F	F	F	-	F	F	F	F	F	F	F	F	F	-	-	F	F	F	F	F	F	F	F	F	F	F	F	F	F	F	F	F	F	F	F	F
AT1G17020	F	F	F	F	F	F	F	F	F	F	-	F	F	F	F	F	F	F	F	F	-	-	F	F	F	F	F	F	F	F	F	F	F	F	F	F	F	F	F	F	F	F	F
AT1G17030	F	F	F	F	F	F	F	F	F	F	-	F	F	F	F	F	F	F	F	F	-	-	F	F	F	F	F	F	F	F	F	F	F	F	F	F	F	F	F	F	F	F	F
AT1G17040	F	F	F	F	F	F	F	F	F	F	-	F	F	F	F	F	F	F	F	F	-	-	F	F	F	F	F	F	F	F	F	F	F	F	F	F	T	F	F	F	F	F	F
AT1G17050	F	F	F	F	F	F	F	F	F	F	-	F	F	F	F	F	F	F	F	F	-	-	F	F	F	F	F	F	F	F	F	F	F	F	F	F	T	F	F	F	F	F	F
AT1G17060	F	F	F	F	F	F	F	F	F	F	-	F	F	F	F	F	F	F	F	F	-	-	F	F	F	F	F	F	F	F	F	F	F	F	F	F	F	F	F	F	F	F	F
AT1G17070	F	F	F	F	F	F	F	F	F	F	-	F	F	F	F	F	F	F	F	F	-	-	F	F	F	F	F	F	F	F	F	F	F	F	F	F	F	F	F	F	F	F	F
AT1G17080	F	F	F	F	F	F	F	F	F	F	-	F	F	F	F	F	F	F	F	F	-	-	F	F	F	F	F	F	F	F	F	F	F	F	F	F	F	F	F	F	F	F	F
AT1G17090	F	F	F	F	F	F	F	F	F	F	-	F	F	F	F	F	F	F	F	F	-	-	F	F	F	F	F	F	F	F	F	F	F	F	F	F	F	F	F	F	F	F	F
AT1G17100	F	F	F	F	F	F	F	F	F	F	-	F	F	F	F	F	F	F	F	F	-	-	F	F	F	F	F	F	F	F	F	F	F	F	F	F	F	F	F	F	F	F	F
AT1G17110	F	F	F	F	F	F	F	F	F	F	-	F	F	F	F	F	F	F	F	F	-	-	F	F	F	F	F	F	F	F	F	F	F	F	F	F	F	F	F	F	F	F	F
AT1G17120	F	F	F	F	F	F	F	F	F	F	-	F	F	F	F	F	F	F	F	F	-	-	F	F	F	F	F	F	F	F	F	F	F	F	F	F	F	F	F	F	F	F	F
AT1G17130	F	F	F	F	F	F	F	F	F	F	-	F	F	F	F	F	F	F	F	F	-	-	F	F	F	F	F	F	F	F	F	F	F	F	F	F	F	F	F	F	F	F	F
AT1G17140	F	F	F	F	F	F	F	F	F	F	-	F	F	F	F	F	F	F	F	F	-	-	F	F	F	F	F	F	F	F	F	F	F	F	F	F	F	F	F	F	F	F	F
AT1G17145	F	F	F	F	F	F	F	F	F	F	-	F	F	F	F	F	F	F	F	F	-	-	F	F	F	F	F	F	F	F	F	F	F	F	F	F	F	F	F	F	F	F	F
AT1G17147	F	F	F	F	F	F	F	F	F	F	-	F	F	F	F	F	F	F	F	F	-	-	F	F	F	F	F	F	F	F	F	F	F	F	F	F	F	F	F	F	F	F	F
AT1G17150	F	F	F	F	F	F	F	F	F	F	-	F	F	F	F	F	F	F	F	F	-	-	F	F	F	F	F	F	F	F	F	F	F	F	F	F	F	F	F	F	F	F	F
AT1G17160	F	F	F	F	F	F	F	F	F	F	-	F	F	F	F	F	F	F	F	F	-	-	F	F	F	F	F	F	F	F	F	F	F	F	F	F	F	F	F	F	F	F	F
AT1G17170	F	F	F	F	F	F	F	F	F	F	-	F	F	F	F	F	F	F	F	F	-	-	F	F	F	F	F	F	F	F	F	F	F	F	F	F	F	F	F	F	F	F	F
AT1G17180	F	F	F	F	F	F	F	F	F	F	-	F	F	F	F	F	F	F	F	F	-	-	F	F	F	F	F	F	F	F	F	F	F	F	F	F	F	F	F	F	F	F	F
AT1G17190	F	F	F	F	F	F	F	F	F	F	-	F	F	F	F	F	F	F	F	F	-	-	F	F	F	F	F	F	F	F	F	F	F	F	F	F	F	F	F	F	F	F	F
AT1G17200	F	F	F	F	F	F	F	F	F	F	-	F	F	F	F	F	F	F	F	F	-	-	F	F	F	F	F	F	F	F	F	F	F	F	F	F	F	F	F	F	F	F	F
AT1G17210	F	F	F	F	F	F	F	F	F	F	-	F	F	F	F	F	F	F	F	F	-	-	F	F	F	F	F	F	F	F	F	F	F	F	F	F	F	F	F	F	F	F	F
AT1G17220	F	F	F	F	F	F	F	F	F	F	-	F	F	F	F	F	F	F	F	F	-	-	F	F	F	F	F	F	F	F	F	F	F	F	F	F	F	F	F	F	F	F	F
AT1G17230	F	F	F	F	F	F	F	F	F	F	-	F	F	F	F	F	F	F	F	F	-	-	F	F	F	F	F	F	F	F	F	F	F	F	F	F	F	F	F	F	F	F	F
AT1G17235	F	F	F	F	F	F	F	F	F	F	-	F	F	F	F	F	F	F	F	F	-	-	F	F	F	F	F	F	F	F	F	F	F	F	F	F	F	F	F	F	F	F	F
AT1G17240	F	F	F	F	F	F	F	F	F	F	-	F	F	F	F	F	F	F	F	F	-	-	F	F	F	F	F	F	F	F	F	F	F	F	F	F	F	F	F	F	F	F	F
AT1G17250	F	F	F	F	F	F	F	F	F	F	-	F	F	F	F	F	F	F	F	F	-	-	F	F	F	F	F	F	F	F	F	F	F	F	F	F	F	F	F	F	F	F	F
AT1G17255	F	F	F	F	F	F	F	F	F	F	-	F	F	F	F	F	F	F	F	F	-	-	F	F	F	F	F	F	F	F	F	F	F	F	F	F	F	F	F	F	F	F	F
AT1G17260	F	F	F	F	F	F	F	F	F	F	-	F	F	F	F	F	F	F	F	F	-	-	F	F	F	F	F	F	F	F	F	F	F	F	F	F	F	F	F	F	F	F	F
AT1G17270	F	F	F	F	F	F	F	F	F	F	-	F	F	F	F	F	F	F	F	F	-	-	F	F	F	F	F	F	F	F	F	F	F	F	F	F	F	F	F	F	F	F	F
AT1G17275	F	F	F	F	F	F	F	F	F	F	-	F	F	F	F	F	F	F	F	F	-	-	F	F	F	F	F	F	F	F	F	F	F	F	F	F	F	F	F	F	F	F	F
AT1G17277	F	F	F	F	F	F	F	F	F	F	-	F	F	F	F	F	F	F	F	F	-	-	F	F	F	F	F	F	F	F	F	F	F	F	F	F	F	F	F	F	F	F	F
AT1G17280	F	F	F	F	F	F	F	F	F	F	-	F	F	F	F	F	F	F	F	F	-	-	F	F	F	F	F	F	F	F	F	F	F	F	F	F	F	F	F	F	F	F	F
AT1G17285	F	F	F	F	F	F	F	F	F	F	-	F	F	F	F	F	F	F	F	F	-	-	F	F	F	F	F	F	F	F	F	F	F	F	F	F	F	F	F	F	F	F	F
AT1G17290	F	F	F	F	F	F	F	F	F	F	-	F	F	F	F	F	F	F	F	F	-	-	F	F	F	F	F	F	F	F	F	F	F	F	F	F	F	F	F	F	F	F	F
AT1G17300	F	F	F	F	F	F	F	F	F	F	-	F	F	F	F	F	F	F	F	F	-	-	F	F	F	F	F	F	F	F	F	F	F	F	F	F	F	F	F	F	F	F	F
AT1G17310	F	F	F	F	F	F	F	F	F	F	-	F	F	F	F	F	F	F	F	F	-	-	F	F	F	F	F	F	F	F	F	F	F	F	F	F	F	F	F	F	F	F	F
AT1G17330	F	F	F	F	F	F	F	F	F	F	-	F	F	F	F	F	F	F	F	F	-	-	F	F	F	F	F	F	F	F	F	F	F	F	F	F	F	F	F	F	F	F	F
AT1G17340	F	F	F	F	F	F	F	F	F	F	-	F	F	F	F	F	F	F	F	F	-	-	F	F	F	F	F	F	F	F	F	F	F	F	F	F	F	F	F	F	F	F	F
AT1G17345	F	F	F	F	F	F	F	F	F	F	-	F	F	F	F	F	F	F	F	F	-	-	F	F	F	F	F	F	F	F	F	F	F	F	F	F	F	F	F	F	F	F	F
AT1G17350	F	F	F	F	F	F	F	F	F	F	-	F	F	F	F	F	F	F	F	F	-	-	F	F	F	F	F	F	F	F	F	F	F	F	F	F	F	F	F	F	F	F	F
AT1G17360	F	F	F	F	F	F	F	F	F	F	-	F	F	F	F	F	F	F	F	F	-	-	F	F	F	F	F	F	F	F	F	F	F	F	F	F	F	F	F	F	F	F	F
AT1G17370	F	F	F	F	F	F	F	F	F	F	-	F	F	F	F	F	F	F	F	F	-	-	F	F	F	F	F	F	F	F	F	F	F	F	F	F	F	F	F	F	F	F	F
AT1G17380	F	F	F	F	F	F	F	F	F	F	-	F	F	F	F	F	F	F	F	F	-	-	F	F	F	F	F	F	F	F	F	F	F	F	F	F	F	F	F	T	F	F	F
AT1G17390	F	F	F	F	F	F	F	F	F	F	-	F	F	F	F	F	F	F	F	F	-	-	F	F	F	F	F	F	F	F	F	F	F	F	F	F	F	F	F	F	F	F	F
AT1G17400	F	F	F	F	F	F	F	F	F	F	-	F	F	F	F	F	F	F	F	F	-	-	F	F	F	F	F	F	F	F	F	F	F	F	F	F	F	F	F	F	F	F	F
AT1G17410	F	F	F	F	F	F	F	F	F	F	-	F	F	F	F	F	F	F	F	F	-	-	F	F	F	F	F	F	F	F	F	F	F	F	F	F	F	F	F	F	F	F	F
AT1G17420	F	F	F	F	F	F	F	F	F	F	-	F	F	F	F	F	F	F	F	F	-	-	F	F	F	F	F	F	F	F	F	F	F	F	F	F	F	F	F	F	F	F	F
AT1G17430	F	F	F	F	F	F	F	F	F	F	-	F	F	F	F	F	F	F	F	F	-	-	F	F	F	F	F	F	F	F	F	F	F	F	F	F	F	F	F	F	F	F	F
AT1G17440	F	F	F	F	F	F	F	F	F	F	-	F	F	F	F	F	F	F	F	F	-	-	F	F	F	F	F	F	F	F	F	F	F	F	F	F	F	F	F	F	F	F	F
AT1G17450	F	F	F	F	F	F	F	F	F	F	-	F	F	F	F	F	F	F	F	F	-	-	F	F	F	F	F	F	F	F	F	F	F	F	F	F	F	F	F	F	F	F	F
AT1G17455	F	F	F	F	F	F	F	F	F	F	-	F	F	F	F	F	F	F	F	F	-	-	F	F	F	F	F	F	F	F	F	F	F	F	F	F	F	F	F	F	F	F	F
AT1G17460	F	F	F	F	F	F	F	F	F	F	-	F	F	F	F	F	F	F	F	F	-	-	F	F	F	F	F	F	F	F	F	F	F	F	F	F	F	F	F	F	F	F	F
AT1G17470	F	F	F	F	F	F	F	F	F	F	-	F	F	F	F	F	F	F	F	F	-	-	F	F	F	F	F	F	F	F	F	F	F	F	F	F	F	F	F	F	F	F	F
AT1G17480	F	F	F	F	F	F	F	F	F	F	-	F	F	F	F	F	F	F	F	F	-	-	F	F	F	F	F	F	F	F	F	F	F	F	F	F	F	F	F	F	F	F	F
AT1G17490	F	F	F	F	F	F	F	F	F	F	-	F	F	F	F	F	F	F	F	F	-	-	F	F	F	F	F	F	F	F	F	F	F	F	F	F	F	F	F	F	F	F	F
AT1G17495	F	F	F	F	F	F	F	F	F	F	-	F	F	F	F	F	F	F	F	F	-	-	F	F	F	F	F	F	F	F	F	F	F	F	F	F	F	F	F	F	F	F	F
AT1G17500	F	F	F	F	F	F	F	F	F	F	-	F	F	F	F	F	F	F	F	F	-	-	F	F	F	F	F	F	F	F	F	F	F	F	F	F	F	F	F	F	F	F	F
AT1G17510	F	F	F	F	F	F	F	F	F	F	-	F	F	F	F	F	F	F	F	F	-	-	F	F	F	F	F	F	F	F	F	F	F	F	F	F	F	F	F	F	F	F	F
AT1G17520	F	F	F	F	F	F	F	F	F	F	-	F	F	F	F	F	F	F	F	F	-	-	F	F	F	F	F	F	F	F	F	F	F	F	F	F	F	F	F	F	F	F	F
AT1G17530	F	F	F	F	F	F	F	F	F	F	-	F	F	F	F	F	F	F	F	F	-	-	F	F	F	F	F	F	F	F	F	F	F	F	F	F	F	F	F	F	F	F	F
AT1G17540	F	F	F	F	F	F	F	F	F	F	-	F	F	F	F	F	F	F	F	F	-	-	F	F	F	F	F	F	F	F	F	F	F	F	F	F	F	F	F	F	F	F	F
AT1G17545	F	F	F	F	F	F	F	F	F	F	-	F	F	F	F	F	F	F	F	F	-	-	F	F	F	F	F	F	F	F	F	F	F	F	F	F	F	F	F	F	F	F	F
AT1G17550	F	F	F	F	F	F	F	F	F	F	-	F	F	F	F	F	F	F	F	F	-	-	F	F	F	F	F	F	F	F	F	F	F	F	F	F	F	F	F	F	F	F	F
AT1G17560	F	F	F	F	F	F	F	F	F	F	-	F	F	F	F	F	F	F	F	F	-	-	F	F	F	F	F	F	F	F	F	F	F	F	F	F	F	F	F	F	F	F	F
AT1G17570	F	F	F	F	F	F	F	F	F	F	-	F	F	F	F	F	F	F	F	F	-	-	F	F	F	F	F	F	F	F	F	F	F	F	F	F	F	F	F	F	F	F	F
AT1G17580	F	F	F	F	F	F	F	F	F	F	-	F	F	F	F	F	F	F	F	F	-	-	F	F	F	F	F	F	F	F	F	F	F	F	F	F	F	F	F	F	F	F	F
AT1G17590	F	F	F	F	F	F	F	F	F	F	-	F	F	F	F	F	F	F	F	F	-	-	F	F	F	F	F	F	F	F	F	F	F	F	F	F	F	F	F	F	F	F	F
AT1G17600	F	F	F	F	F	F	F	F	F	F	-	F	F	F	F	F	F	F	F	F	-	-	F	F	F	F	F	F	F	F	F	F	F	F	F	F	F	F	F	F	F	F	F
AT1G17610	F	F	F	F	F	F	F	F	F	F	-	F	F	F	F	F	F	F	F	F	-	-	F	F	F	F	F	F	F	F	F	F	F	F	F	F	F	F	F	F	F	F	F
AT1G17615	F	F	F	F	F	F	F	F	F	F	-	F	F	F	F	F	F	F	F	F	-	-	F	F	F	F	F	F	F	F	F	F	F	F	F	F	F	F	F	F	F	F	F
AT1G17620	F	F	F	F	F	F	F	F	F	F	-	F	F	F	F	F	F	F	F	F	-	-	F	F	F	F	F	F	F	F	F	F	F	F	F	F	F	F	F	F	F	F	F
AT1G17630	F	F	F	F	F	F	F	F	F	F	-	F	F	F	F	F	F	F	F	F	-	-	F	F	F	F	F	F	F	F	F	F	F	F	F	F	F	F	F	F	F	F	F
AT1G17640	F	F	F	F	F	F	F	F	F	F	-	F	F	F	F	F	F	F	F	F	-	-	F	F	F	F	F	F	F	F	F	F	F	F	F	F	F	F	F	F	F	F	F
AT1G17650	F	F	F	F	F	F	F	F	F	F	-	F	F	F	F	F	F	F	F	F	-	-	F	F	F	F	F	F	F	F	F	F	F	F	F	F	F	F	F	F	F	F	F
AT1G17660	F	F	F	F	F	F	F	F	F	F	-	F	F	F	F	F	F	F	F	F	-	-	F	F	F	F	F	F	F	F	F	F	F	F	F	F	F	F	F	F	F	F	F
AT1G17665	F	F	F	F	F	F	F	F	F	F	-	F	F	F	F	F	F	F	F	F	-	-	F	F	F	F	F	F	F	F	F	F	F	F	F	F	F	F	F	F	F	F	F
AT1G17670	F	F	F	F	F	F	F	F	F	F	-	F	F	F	F	F	F	F	F	F	-	-	F	F	F	F	F	F	F	F	F	F	F	F	F	F	F	F	F	F	F	F	F
AT1G17680	F	F	F	F	F	F	F	F	F	F	-	F	F	F	F	F	F	F	F	F	-	-	F	F	F	F	F	F	F	F	F	F	F	F	F	F	F	F	F	F	F	F	F
AT1G17690	F	F	F	F	F	F	F	F	F	F	-	F	F	F	F	F	F	F	F	F	-	-	F	F	F	F	F	F	F	F	F	F	F	F	F	F	F	F	F	F	F	F	F
AT1G17700	F	F	F	F	F	F	F	F	F	F	-	F	F	F	F	F	F	F	F	F	-	-	F	F	F	F	F	F	F	F	F	F	F	F	F	F	F	F	F	F	F	F	F
AT1G17710	F	F	F	F	F	F	F	F	F	F	-	F	F	F	F	F	F	F	F	F	-	-	F	F	F	F	F	F	F	F	F	F	F	F	F	F	F	F	F	F	F	F	F
AT1G17720	F	F	F	F	F	F	F	F	F	F	-	F	F	F	F	F	F	F	F	F	-	-	F	F	F	F	F	F	F	F	F	F	F	F	F	F	F	F	F	F	F	F	F
AT1G17744	F	F	F	F	F	F	F	F	F	F	-	F	F	F	F	F	F	F	F	F	-	-	F	F	F	F	F	F	F	F	F	F	F	F	F	F	F	F	F	F	F	F	F
AT1G17745	F	F	F	F	F	F	F	F	F	F	-	F	F	F	F	F	F	F	F	F	-	-	F	F	F	F	F	F	F	F	F	F	F	F	F	F	F	F	F	F	F	F	F
AT1G17750	F	F	F	F	F	F	F	F	F	F	-	F	F	F	F	F	F	F	F	F	-	-	F	F	F	F	F	F	F	F	F	F	F	F	F	F	F	F	F	F	F	F	F
AT1G17760	F	F	F	F	F	F	F	F	F	F	-	F	F	F	F	F	F	F	F	F	-	-	F	F	F	F	F	F	F	F	F	F	F	F	F	F	F	F	F	F	F	F	F
AT1G17770	F	F	F	F	F	F	F	F	F	F	-	F	F	F	F	F	F	F	F	F	-	-	F	F	F	F	F	F	F	F	F	F	F	F	F	F	F	F	F	F	F	F	F
AT1G17780	F	F	F	F	F	F	F	F	F	F	-	F	F	F	F	F	F	F	F	F	-	-	F	F	F	F	F	F	F	F	F	F	F	F	F	F	F	F	F	F	F	F	F
AT1G17790	F	F	F	F	F	F	F	F	F	F	-	F	F	F	F	F	F	F	F	F	-	-	F	F	F	F	F	F	F	F	F	F	F	F	F	F	F	F	F	F	F	F	F
AT1G17800	F	F	F	F	F	F	F	F	F	F	-	F	F	F	F	F	F	F	F	F	-	-	F	F	F	F	F	F	F	F	F	F	F	F	F	F	F	F	F	F	F	F	F
AT1G17810	F	F	F	F	F	F	F	F	F	F	-	F	F	F	F	F	F	F	F	F	-	-	F	F	F	F	F	F	F	F	F	F	F	F	F	F	F	F	F	F	F	F	F
AT1G17820	F	F	F	F	F	F	F	F	F	F	-	F	F	F	F	F	F	F	F	F	-	-	F	F	F	F	F	F	F	F	F	F	F	F	F	F	F	F	F	F	F	F	F
AT1G17830	F	F	F	F	F	F	F	F	F	F	-	F	F	F	F	F	F	F	F	F	-	-	F	F	F	F	F	F	F	F	F	F	F	F	F	F	F	F	F	F	F	F	F
AT1G17840	F	F	F	F	F	F	F	F	F	F	-	F	F	F	F	F	F	F	F	F	-	-	F	F	F	F	F	F	F	F	F	F	F	F	F	F	F	F	F	F	F	F	F
AT1G17850	F	F	F	F	F	F	F	F	F	F	-	F	F	F	F	F	F	F	F	F	-	-	F	F	F	F	F	F	F	F	F	F	F	F	F	F	F	F	F	F	F	F	F
AT1G17860	F	F	F	F	F	F	F	F	F	F	-	F	F	F	F	F	F	F	F	F	-	-	F	F	F	F	F	F	F	F	F	F	F	F	F	F	F	F	F	F	F	F	F
AT1G17870	F	F	F	F	F	F	F	F	F	F	-	F	F	F	F	F	F	F	F	F	-	-	F	F	F	F	F	F	F	F	F	F	F	F	F	F	F	F	F	F	F	F	F
AT1G17880	F	F	F	F	F	F	F	F	F	F	-	F	F	F	F	F	F	F	F	F	-	-	F	F	F	F	F	F	F	F	F	F	F	F	F	F	F	F	F	F	F	F	F
AT1G17890	F	F	F	F	F	F	F	F	F	F	-	F	F	F	F	F	F	F	F	F	-	-	F	F	F	F	F	F	F	F	F	F	F	F	F	F	F	F	F	F	F	F	F
AT1G17900	F	F	F	F	F	F	F	F	F	F	-	F	F	F	F	F	F	F	F	F	-	-	F	F	F	F	F	F	F	F	F	F	F	F	F	F	F	F	F	F	F	F	F
AT1G17910	F	F	F	F	F	F	F	F	F	F	-	F	F	F	F	F	F	F	F	F	-	-	F	F	F	F	F	F	F	F	F	F	F	F	F	F	F	F	F	F	F	F	F
AT1G17920	F	F	F	F	F	F	F	F	F	F	-	F	F	F	F	F	F	F	F	F	-	-	F	F	F	F	F	F	F	F	F	F	F	F	F	F	F	F	F	F	F	F	F
AT1G17930	F	F	F	F	F	F	F	F	F	F	-	F	F	F	F	F	F	F	F	F	-	-	F	F	F	F	F	F	F	F	F	F	F	F	F	F	F	F	F	F	F	F	F
AT1G17940	F	F	F	F	F	F	F	F	F	F	-	F	F	F	F	F	F	F	F	F	-	-	F	F	F	F	F	F	F	F	F	F	F	F	F	F	F	F	F	F	F	F	F
AT1G17950	F	F	F	F	F	F	F	F	F	F	-	F	F	F	F	F	F	F	F	F	-	-	F	F	F	F	F	F	F	F	F	F	F	F	F	F	F	F	F	F	F	F	F
AT1G17960	F	F	F	F	F	F	F	F	F	F	-	F	F	F	F	F	F	F	F	F	-	-	F	F	F	F	F	F	F	F	F	F	F	F	F	F	F	F	F	F	F	F	F
AT1G17970	F	F	F	F	F	F	F	F	F	F	-	F	F	F	F	F	F	F	F	F	-	-	F	F	F	F	F	F	F	F	F	F	F	F	F	F	F	F	F	F	F	F	F
AT1G17980	F	F	F	F	F	F	F	F	F	F	-	F	F	F	F	F	F	F	F	F	-	-	F	F	F	F	F	F	F	F	F	F	F	F	F	F	F	F	F	F	F	F	F
AT1G18040	F	F	F	F	F	F	F	F	F	F	-	F	F	F	F	F	F	F	F	F	-	-	F	F	F	F	F	F	F	F	F	F	F	F	F	F	F	F	F	F	F	F	F
AT1G18075	F	F	F	F	F	F	F	F	F	F	-	F	F	F	F	F	F	F	F	F	-	-	F	F	F	F	F	F	F	F	F	F	F	F	F	F	F	F	F	F	F	F	F
AT1G18080	F	F	F	F	F	F	F	F	F	F	-	F	F	F	F	F	F	F	F	F	-	-	F	F	F	F	F	F	F	F	F	F	F	F	F	F	F	F	F	F	F	F	F
AT1G18090	F	F	F	F	F	F	F	F	F	F	-	F	F	F	F	F	F	F	F	F	-	-	F	F	F	F	F	F	F	F	F	F	F	F	F	F	F	F	F	F	F	F	F
AT1G18100	F	F	F	F	F	F	F	F	F	F	-	F	F	F	F	F	F	F	F	F	-	-	F	F	F	F	F	F	F	F	F	F	F	F	F	F	F	F	F	F	F	F	F
AT1G18120	F	F	F	F	F	F	F	F	F	F	-	F	F	F	F	F	F	F	F	F	-	-	F	F	F	F	F	F	F	F	F	F	F	F	F	F	F	F	F	F	F	F	F
AT1G18130	F	F	F	F	F	F	F	F	F	F	-	F	F	F	F	F	F	F	F	F	-	-	F	F	F	F	F	F	F	F	F	F	F	F	F	F	F	F	F	F	F	F	F
AT1G18140	F	F	F	F	F	F	F	F	F	F	-	F	F	F	F	F	F	F	F	F	-	-	F	F	F	F	F	F	F	F	F	F	F	F	F	F	F	F	F	F	F	F	F
AT1G18150	F	F	F	F	F	F	F	F	F	F	-	F	F	F	F	F	F	F	F	F	-	-	F	F	F	F	F	F	F	F	F	F	F	F	F	F	F	F	F	F	F	F	F
AT1G18160	F	F	F	F	F	F	F	F	F	F	-	F	F	F	F	F	F	F	F	F	-	-	F	F	F	F	F	F	F	F	F	F	F	F	F	F	F	F	F	F	F	F	F
AT1G18170	F	F	F	F	F	F	F	F	F	F	-	F	F	F	F	F	F	F	F	F	-	-	F	F	F	F	F	F	F	F	F	F	F	F	F	F	F	F	F	F	F	F	F
AT1G18180	F	F	F	F	F	F	F	F	F	F	-	F	F	F	F	F	F	F	F	F	-	-	F	F	F	F	F	F	F	F	F	F	F	F	F	F	F	F	F	F	F	F	F
AT1G18190	F	F	F	F	F	F	F	F	F	F	-	F	F	F	F	F	F	F	F	F	-	-	F	F	F	F	F	F	F	F	F	F	F	F	F	F	F	F	F	F	F	F	F
AT1G18200	F	F	F	F	F	F	F	F	F	F	-	F	F	F	F	F	F	F	F	F	-	-	F	F	F	F	F	F	F	F	F	F	F	F	F	F	F	F	F	F	F	F	F
AT1G18210	F	F	F	F	F	F	F	F	F	F	-	F	F	F	F	F	F	F	F	F	-	-	F	F	F	F	F	F	F	F	F	F	F	F	F	F	F	F	F	F	F	F	F
AT1G18220	F	F	F	F	F	F	F	F	F	F	-	F	F	F	F	F	F	F	F	F	-	-	F	F	F	F	F	F	F	F	F	F	F	F	F	F	F	F	F	F	F	F	F
AT1G18230	F	F	F	F	F	F	F	F	F	F	-	F	F	F	F	F	F	F	F	F	-	-	F	F	F	F	F	F	F	F	F	F	F	F	F	F	F	F	F	F	F	F	F
AT1G18250	F	F	F	F	F	F	F	F	F	F	-	F	F	F	F	F	F	F	F	F	-	-	F	F	F	F	F	F	F	F	F	F	F	F	F	F	F	F	F	F	F	F	F
AT1G18260	F	F	F	F	F	F	F	F	F	F	-	F	F	F	F	F	F	F	F	F	-	-	F	F	F	F	F	F	F	F	F	F	F	F	F	F	F	F	F	F	F	F	F
AT1G18265	F	F	F	F	F	F	F	F	F	F	-	F	F	F	F	F	F	F	F	F	-	-	F	F	F	F	F	F	F	F	F	F	F	F	F	F	F	F	F	F	F	F	F
AT1G18270	F	F	F	F	F	F	F	T	F	F	-	F	F	F	F	F	F	F	F	F	-	-	F	F	F	F	F	F	F	F	F	F	F	F	F	F	F	F	F	F	F	F	F
AT1G18280	F	F	F	F	F	F	F	F	F	F	-	F	F	F	F	F	F	F	F	F	-	-	F	F	F	F	F	F	F	F	F	F	F	F	F	F	F	F	F	F	F	F	F
AT1G18290	F	F	F	F	F	F	F	F	F	F	-	F	F	F	F	F	F	F	F	F	-	-	F	F	F	F	F	F	F	F	F	F	F	F	F	F	F	F	F	F	F	F	F
AT1G18300	F	F	F	F	F	F	F	F	F	F	-	F	F	F	F	F	F	F	F	F	-	-	F	F	F	F	F	F	F	F	F	F	F	F	F	F	F	F	F	F	F	F	F
AT1G18310	F	F	F	F	F	F	F	F	F	F	-	F	F	F	F	F	F	F	F	F	-	-	F	F	F	F	F	F	F	F	F	F	F	F	F	F	F	F	F	F	F	F	F
AT1G18320	F	F	F	F	F	F	F	F	F	F	-	F	F	F	F	F	F	F	F	F	-	-	F	F	F	F	F	F	F	F	F	F	F	F	F	F	F	F	F	F	F	F	F
AT1G18330	F	F	F	F	F	F	F	F	F	F	-	F	F	F	F	F	F	F	F	F	-	-	F	F	F	F	F	F	F	F	F	F	F	F	F	F	F	F	F	F	F	F	F
AT1G18335	F	F	F	F	F	F	F	F	F	F	-	F	F	F	F	F	F	F	F	F	-	-	F	F	F	F	F	F	F	F	F	F	F	F	F	F	F	F	F	F	F	F	F
AT1G18340	F	F	F	F	F	F	F	F	F	F	-	F	F	F	F	F	F	F	F	F	-	-	F	F	F	F	F	F	F	F	F	F	F	F	F	F	F	F	F	F	F	F	F
AT1G18350	F	F	F	F	F	F	F	F	F	F	-	F	F	F	F	F	F	F	F	F	-	-	F	F	F	F	F	F	F	F	F	F	F	F	F	F	F	F	F	F	F	F	F
AT1G18360	F	F	F	F	F	F	F	F	F	F	-	F	F	F	F	F	F	F	F	F	-	-	F	F	F	F	F	F	F	F	F	F	F	F	F	F	F	F	F	F	F	F	F
AT1G18370	F	F	F	F	F	F	F	F	F	F	-	F	F	F	F	F	F	F	F	F	-	-	F	F	F	F	F	F	F	F	F	F	F	F	F	F	F	F	F	F	F	F	F
AT1G18380	F	F	F	F	F	F	F	F	F	F	-	F	F	F	F	F	F	F	F	F	-	-	F	F	F	F	F	F	F	F	F	F	F	F	F	F	F	F	F	F	F	F	F
AT1G18382	F	F	F	F	F	F	F	F	F	F	-	F	F	F	F	F	F	F	F	F	-	-	F	F	F	F	F	F	F	F	F	F	F	F	F	F	F	F	F	F	F	F	F
AT1G18390	F	F	F	F	F	F	F	F	F	F	-	F	F	F	F	F	F	F	F	F	-	-	F	F	F	F	F	F	F	F	F	F	F	F	F	F	F	F	F	F	F	F	F
AT1G18400	F	F	F	F	F	F	F	F	F	F	-	F	F	F	F	F	F	F	F	F	-	-	F	F	F	F	F	F	F	F	F	F	F	F	F	F	F	F	F	F	F	F	F
AT1G18410	F	F	F	F	F	F	F	F	F	F	-	F	F	F	F	F	F	F	F	F	-	-	F	F	F	F	F	F	F	F	F	F	F	F	F	F	F	F	F	F	F	F	F
AT1G18415	F	F	F	F	F	F	F	F	F	F	-	F	F	F	F	F	F	F	F	F	-	-	F	F	F	F	F	F	F	F	F	F	F	F	F	F	F	F	F	F	F	F	F
AT1G18420	F	F	F	F	F	F	F	F	F	F	-	F	F	F	F	F	F	F	F	F	-	-	F	F	F	F	F	F	F	F	F	F	F	F	F	F	F	F	F	F	F	F	F
AT1G18430	F	F	F	F	F	F	F	F	F	F	-	F	F	F	F	F	F	F	F	F	-	-	F	F	F	F	F	F	F	F	F	F	F	F	F	F	F	F	F	F	F	F	F
AT1G18440	F	F	F	F	F	F	F	F	F	F	-	F	F	F	F	F	F	F	F	F	-	-	F	F	F	F	F	F	F	F	F	F	F	F	F	F	F	F	F	F	F	F	F
AT1G18450	F	F	F	F	F	F	F	F	F	F	-	F	F	F	F	F	F	F	F	F	-	-	F	F	F	F	F	F	F	F	F	F	F	F	F	F	F	F	F	T	F	F	F
AT1G18460	F	F	F	F	F	F	F	F	F	F	-	F	F	F	F	F	F	F	F	F	-	-	F	F	F	F	F	F	F	F	F	F	F	F	F	F	F	F	F	F	F	F	F
AT1G18470	F	F	F	F	F	F	F	F	F	F	-	F	F	F	F	F	F	F	F	F	-	-	F	F	F	F	F	F	F	F	F	F	F	F	F	F	F	F	F	F	F	F	F
AT1G18480	F	F	F	F	F	F	F	F	F	F	-	F	F	F	F	F	F	F	F	F	-	-	F	F	F	F	F	F	F	F	F	F	F	F	F	F	F	F	F	F	F	F	F
AT1G18485	F	F	F	F	F	F	F	F	F	F	-	F	F	F	F	F	F	F	F	F	-	-	F	F	F	F	F	F	F	F	F	F	F	F	F	F	F	F	F	F	F	F	F
AT1G18486	F	F	F	F	F	F	F	F	F	F	-	F	F	F	F	F	F	F	F	F	-	-	F	F	F	F	F	F	F	F	F	F	F	F	F	F	F	F	F	F	F	F	F
AT1G18490	F	F	F	F	F	F	F	F	F	F	-	F	F	F	F	F	F	F	F	F	-	-	F	F	F	F	F	F	F	F	F	F	F	F	F	F	F	F	F	F	F	F	F
AT1G18500	F	F	F	F	F	F	F	F	F	F	-	F	F	F	F	F	F	F	F	F	-	-	F	F	F	F	F	F	F	F	F	F	F	F	F	F	F	F	F	F	F	F	F
AT1G18510	F	F	F	F	F	F	F	F	F	F	-	F	F	F	F	F	F	F	F	F	-	-	F	F	F	F	F	F	F	F	F	F	F	F	F	F	F	F	F	F	F	F	F
AT1G18520	F	F	F	F	F	F	F	F	F	F	-	F	F	F	F	F	F	F	F	F	-	-	F	F	F	F	F	F	F	F	F	F	F	F	F	F	F	F	F	F	F	F	F
AT1G18530	F	F	F	F	F	F	F	F	F	F	-	F	F	F	F	F	F	F	F	F	-	-	F	F	F	F	F	F	F	F	F	F	F	F	F	F	F	F	F	F	F	F	F
AT1G18540	F	F	F	F	F	F	F	F	F	F	-	F	F	F	F	F	F	F	F	F	-	-	F	F	F	F	F	F	F	F	F	F	F	F	F	F	F	F	F	F	F	F	F
AT1G18550	F	F	F	F	F	F	F	F	F	F	-	F	F	F	F	F	F	F	F	F	-	-	F	F	F	F	F	F	F	F	F	F	F	F	F	F	F	F	F	F	F	F	F
AT1G18560	F	F	F	F	F	F	F	F	F	F	-	F	F	F	F	F	F	F	F	F	-	-	F	F	F	F	F	F	F	F	F	F	F	F	F	F	F	F	F	F	F	F	F
AT1G18570	F	F	F	F	F	F	F	F	F	F	-	F	F	F	F	F	F	F	F	F	-	-	F	F	F	F	F	F	F	F	F	F	F	F	F	F	F	F	F	F	F	F	F
AT1G18580	F	F	F	F	F	F	F	F	F	F	-	F	F	F	F	F	F	F	F	F	-	-	F	F	F	F	F	F	F	F	F	F	F	F	F	F	F	F	F	F	F	F	F
AT1G18590	F	F	F	F	F	F	F	F	F	F	-	F	F	F	F	F	F	F	F	F	-	-	F	F	F	F	F	F	F	F	F	F	F	F	F	F	F	F	F	F	F	F	F
AT1G18610	F	F	F	F	F	F	F	F	F	F	-	F	F	F	F	F	F	F	F	F	-	-	F	F	F	F	F	F	F	F	F	F	F	F	F	F	F	F	F	F	F	F	F
AT1G18620	F	F	F	F	F	F	F	F	F	F	-	F	F	F	F	F	F	F	F	F	-	-	F	F	F	F	F	F	F	F	F	F	F	F	F	F	F	F	F	F	F	F	F
AT1G18630	F	F	F	F	F	F	F	F	F	F	-	F	F	F	F	F	F	F	F	F	-	-	F	F	F	F	F	F	F	F	F	F	F	F	F	F	F	F	F	F	F	F	F
AT1G18640	F	F	F	F	F	F	F	F	F	F	-	F	F	F	F	F	F	F	F	F	-	-	F	F	F	F	F	F	F	F	F	F	F	F	F	F	F	F	F	F	F	F	F
AT1G18650	F	F	F	F	F	F	F	F	F	F	-	F	F	F	F	F	F	F	F	F	-	-	F	F	F	F	F	F	F	F	F	F	F	F	F	F	F	F	F	F	F	F	F
AT1G18660	F	F	F	F	F	F	F	F	F	F	-	F	F	F	F	F	F	F	F	F	-	-	F	F	F	F	F	F	F	F	F	F	F	F	F	F	F	F	F	F	F	F	F
AT1G18670	F	F	F	F	F	F	F	F	F	F	-	F	F	F	F	F	F	F	F	F	-	-	F	F	F	F	F	F	F	F	F	F	F	F	F	F	F	F	F	F	F	T	F
AT1G18680	F	F	F	F	F	F	F	F	F	F	-	F	F	F	F	F	F	F	F	F	-	-	F	F	F	F	F	F	F	F	F	F	F	F	F	F	F	F	F	F	F	F	F
AT1G18690	F	F	F	F	F	F	F	F	F	F	-	F	F	F	F	F	F	F	F	F	-	-	F	F	F	F	F	F	F	F	F	F	F	F	F	F	F	F	F	F	F	F	F
AT1G18700	F	F	F	F	F	F	F	F	F	F	-	F	F	F	F	F	F	F	F	F	-	-	F	F	F	F	F	F	F	F	F	F	F	F	F	F	F	F	F	F	F	F	F
AT1G18710	F	F	F	F	F	F	F	F	F	F	-	F	F	F	F	F	F	F	F	F	-	-	F	F	F	F	F	F	F	F	F	F	F	F	F	F	F	F	F	F	F	F	F
AT1G18720	F	F	F	F	F	F	F	F	F	F	-	F	F	F	F	F	F	F	F	F	-	-	F	F	F	F	F	F	F	F	F	F	F	F	F	F	F	F	F	F	F	F	F
AT1G18730	F	F	F	F	F	F	F	F	F	F	-	F	F	F	F	F	F	F	F	F	-	-	F	F	F	F	F	F	F	F	F	F	F	F	F	F	F	F	F	F	F	F	F
AT1G18735	F	F	F	F	F	F	F	F	F	F	-	F	F	F	F	F	F	F	F	F	-	-	F	F	F	F	F	F	F	F	F	F	F	F	F	F	F	F	F	F	F	F	F
AT1G18740	F	F	F	F	F	F	F	F	F	F	-	F	F	F	F	F	F	F	F	F	-	-	F	F	F	F	F	F	F	F	T	F	F	F	F	F	F	F	F	F	F	F	F
AT1G18750	F	F	F	F	F	F	F	F	F	F	-	F	F	F	F	F	F	F	F	F	-	-	F	F	F	F	F	F	F	F	F	F	F	F	F	F	F	F	F	F	F	F	F
AT1G18760	F	F	F	F	F	F	F	F	F	F	-	F	F	F	F	F	F	F	F	F	-	-	F	F	F	F	F	F	F	F	F	F	F	F	F	F	F	F	F	F	F	F	F
AT1G18770	F	F	F	F	F	F	F	F	F	F	-	F	F	F	F	F	F	F	F	F	-	-	F	F	F	F	F	F	F	F	F	F	F	F	F	F	F	F	F	F	F	F	F
AT1G18773	F	F	F	F	F	F	F	F	F	F	-	F	F	F	F	F	F	F	F	F	-	-	F	F	F	F	F	F	F	F	F	F	F	F	F	F	F	F	F	F	F	F	F
AT1G18780	F	F	F	F	F	F	F	F	F	F	-	F	F	F	F	F	F	F	F	F	-	-	F	F	F	F	F	F	F	F	F	F	F	F	F	F	F	F	F	F	F	F	F
AT1G18790	F	F	F	F	F	F	F	F	F	F	-	F	F	F	F	F	F	F	F	F	-	-	F	F	F	F	F	F	F	F	F	F	F	F	F	F	F	F	F	F	F	F	F
AT1G18800	F	F	F	F	F	F	F	F	F	F	-	F	F	F	F	F	F	F	F	F	-	-	F	F	F	F	F	F	F	F	F	F	F	F	F	F	F	F	F	F	F	F	F
AT1G18810	F	F	F	F	F	F	F	F	F	F	-	F	F	F	F	F	F	F	F	F	-	-	F	F	F	F	F	F	F	F	F	F	F	F	F	F	F	F	F	F	F	F	F
AT1G18820	F	F	F	F	F	F	F	F	F	F	-	F	F	F	F	F	F	F	F	F	-	-	F	F	F	F	F	F	F	F	F	F	F	F	F	F	F	F	F	T	F	F	F
AT1G18830	F	F	F	F	F	F	F	F	F	F	-	F	F	F	F	F	F	F	F	F	-	-	F	F	F	F	F	F	F	F	F	F	F	F	F	F	F	F	F	F	F	T	F
AT1G18835	F	F	F	F	F	F	F	F	F	F	-	F	F	F	F	F	F	F	F	F	-	-	F	F	F	F	F	F	F	F	F	F	F	F	F	F	F	F	F	F	F	F	F
AT1G18840	F	F	F	F	F	F	F	F	F	F	-	F	F	F	F	F	F	F	F	F	-	-	F	F	F	F	F	F	F	F	F	F	F	F	F	F	F	F	F	F	F	F	F
AT1G18850	F	F	F	F	F	F	F	F	F	F	-	F	F	F	F	F	F	F	F	F	-	-	F	F	F	F	F	F	F	F	F	F	F	F	F	F	F	F	F	F	F	F	F
AT1G18860	F	F	F	F	F	F	F	F	F	F	-	F	F	F	F	F	F	F	F	F	-	-	F	F	F	F	F	F	F	F	F	F	F	F	F	F	F	F	F	F	F	F	F
AT1G18870	F	F	F	F	F	F	F	F	F	F	-	F	F	F	F	F	F	F	F	F	-	-	F	F	F	F	F	F	F	F	F	F	F	F	F	F	F	F	F	F	F	F	F
AT1G18871	F	F	F	F	F	F	F	F	F	F	-	F	F	F	F	F	F	F	F	F	-	-	F	F	F	F	F	F	F	F	F	F	F	F	F	F	F	F	F	F	F	F	F
AT1G18879	F	F	F	F	F	F	F	F	F	F	-	F	F	F	F	F	F	F	F	F	-	-	F	F	F	F	F	F	F	F	F	F	F	F	F	F	F	F	F	F	F	F	F
AT1G18880	F	F	F	F	F	F	F	F	F	F	-	F	F	F	F	F	F	F	F	F	-	-	F	F	F	F	F	F	F	F	F	F	F	F	F	F	F	F	F	F	F	F	F
AT1G18890	F	F	F	F	F	F	F	F	F	F	-	F	F	F	F	F	F	F	F	F	-	-	F	F	F	F	F	F	F	F	F	F	F	F	F	F	F	F	F	F	F	F	F
AT1G18900	F	F	F	F	F	F	F	F	F	F	-	F	F	F	F	F	F	F	F	F	-	-	F	F	F	F	F	F	F	F	F	F	F	F	F	F	F	F	F	F	F	F	F
AT1G18910	F	F	F	F	F	F	F	F	F	F	-	F	F	F	F	F	F	F	F	F	-	-	F	F	F	F	F	F	F	F	F	F	F	F	F	F	F	F	F	F	F	F	F
AT1G18930	F	F	F	F	F	F	F	F	F	F	-	F	F	F	F	F	F	F	F	F	-	-	F	F	F	F	F	F	F	F	F	F	F	F	F	F	F	F	F	F	F	F	F
AT1G18940	F	F	F	F	F	F	F	F	F	F	-	F	F	F	F	F	F	F	F	F	-	-	F	F	F	F	F	F	F	F	F	F	F	F	F	F	F	F	F	F	F	F	F
AT1G18950	F	F	F	F	F	F	F	F	F	F	-	F	F	F	F	F	F	F	F	F	-	-	F	F	F	F	F	F	F	F	F	F	F	F	F	F	F	F	F	F	F	F	F
AT1G18960	F	F	F	F	F	F	F	F	F	F	-	F	F	F	F	F	F	F	F	F	-	-	F	F	F	F	F	F	F	F	F	F	F	F	F	F	F	F	F	F	F	F	F
AT1G18970	F	F	F	F	F	F	F	F	F	F	-	F	F	F	F	F	F	F	F	F	-	-	F	F	F	F	F	F	F	F	F	F	F	F	F	F	F	F	F	F	F	F	F
AT1G18980	F	F	F	F	F	F	F	F	F	F	-	F	F	F	F	F	F	F	F	F	-	-	F	F	F	F	F	F	F	F	F	F	F	F	F	F	F	F	F	F	F	F	F
AT1G18990	F	F	F	F	F	F	F	F	F	F	-	F	F	F	F	F	F	F	F	F	-	-	F	F	F	F	F	F	F	F	F	F	F	F	F	F	F	F	F	F	F	F	F
AT1G19000	F	F	F	F	F	F	F	F	F	F	-	F	F	F	F	F	F	F	F	F	-	-	F	F	F	F	F	F	F	F	F	F	F	F	F	F	F	F	F	F	F	F	F
[truncated: 29,509 more rows]
