# Supplementary material for: Understanding the Evolution of Defense Metabolites in Arabidopsis thaliana Using Genome-wide Association Mapping
Source: Oxford University Press journal article supplement (doi:10.1534/genetics.109.108522), 2009-09-09
Supplement: tables7.xls [file tables7.xls]

## Sheet: TABLE S7
TABLE S7
GLS genes as a group not preferentially identified by NEST or EMMA in 2007 or 2008
The Kolmogorov-Smirnov D-statistics and corresponding P-values are shown for each trait and for each of 2007 & 2008 datasets from NEST & EMMA results. Each KS-test assessed the null hypothesis that: the GWA P-value distribution corresponding to SNP within ±1kb flanking region of known GLS genes is identical to that of non-GLS SNP.
	EMMA
	2007		2008
	D	P-value	D	P-value
Alkenyl	0.039438	0.18863	0.052815	0.033739
ALLYL	0.03378	0.36735	0.040173	0.17889
BENZYL	-	-	-	-
BUTENYL	0.051944	0.041384	0.04085	0.18247
BZO	-	-	-	-
BZOB	-	-	-	-
BZOP	-	-	-	-
BZOper	-	-	-	-
C3	0.043823	0.12675	0.053945	0.033295
C4	0.037667	0.24084	0.037703	0.25554
C5	0.04581	0.10005	0.052347	0.041808
C7	0.039093	0.2065	0.034608	0.3258
C8	0.030547	0.47627	0.055248	0.02465
ElongLC	0.053607	0.032541	0.038949	0.22676
ElongSC	0.035587	0.2891	0.036299	0.27993
GSOX3	0.029971	0.47552	0.05707	0.0184
GSOX4	0.046091	0.087433	0.053945	0.028928
GSOX7	0.036472	0.26637	0.048826	0.057263
GSOX8	0.036551	0.25307	0.038467	0.22209
I3M	0.030634	0.48356	0.03635	0.27934
LC	0.075436	0.00063421	0.035032	0.32112
MSO	0.0727	0.0010129	0.028121	0.584
NMOI3M	0.07144	0.0012852	0.07468	0.0007249
NOHPer	0.034752	0.3187	0.052045	0.040254
OH	0.059827	0.011535	0.029582	0.49135
OH4Per	0.030209	0.49255	0.072513	0.0010783
OHAlk	0.070043	0.0018967	0.048164	0.071281
OHB	0.052109	0.041152	-	-
OHBUTR	0.043326	0.12974	0.048603	0.062033
OHBUTS	0.035716	0.30416	0.053621	0.031832
OHBUTUNK	0.030389	0.4599	0.03406	0.3541
OHP	0.035551	0.31053	0.037675	0.23879
PENTENYL	0.034082	0.3241	0.036299	0.2756
SC	0.03288	0.38152	0.031094	0.45971
TIND	0.03905	0.21461	0.03563	0.2988
TOH4	0.038114	0.22226	0.054118	0.027495
UNK1	-	-	-	-
UNK2	-	-	-	-
X3MSO	0.041181	0.1679	0.053197	0.037359
X3MT	0.071944	0.0013624	0.074766	0.00076995
X4MOI3M	0.033045	0.37946	0.047653	0.072256
X4MSO	0.058726	0.01343	0.047264	0.078129
X4MT	0.040072	0.18142	0.037099	0.25719
X4OHI3M	-	-	0.035731	0.29977
X5MSO	0.034766	0.31874	0.04162	0.14531
X5MT	0.033787	0.35171	-	-
X7MSO	0.035025	0.32196	0.034219	0.3352
X7MT	0.074356	0.00076802	0.028798	0.55842
X8MSO	0.043621	0.12172	0.044917	0.098619
X8MT	0.040209	0.18452	0.051267	0.044778
