# Supplementary material for: Understanding the Evolution of Defense Metabolites in Arabidopsis thaliana Using Genome-wide Association Mapping
Source: Oxford University Press journal article supplement (doi:10.1534/genetics.109.108522), 2009-09-09
Supplement: tables8.pdf [file tables8.pdf]

**TABLE S8****Using known GSL genes to estimate call thresholds**

|                        | Dataset | $\geq 1$ SNP per gene | $\geq 2$ SNP per gene | $\geq 20\%$ SNP per gene |
|------------------------|---------|-----------------------|-----------------------|--------------------------|
| # of Sig Genes         | 2007    | 5333                  | 1056                  | 1135                     |
|                        | 2008    | 4703                  | 893                   | 960                      |
| GSL Genes in Sig Genes | 2007    | 0.7%                  | 1.2%                  | 0.8%                     |
|                        | 2008    | 0.5%                  | 1.5%                  | 0.5%                     |
| Sig GSL Genes          | 2007    | 25.3%                 | 8.7%                  | 6.0%                     |
|                        | 2008    | 16.7%                 | 8.7%                  | 3.3%                     |

The number of genes significantly associated with at least one trait in the two datasets (2007 and 2008) using three different call thresholds are presented. The percentage of significant genes overlapping with the list of known and putative GSL genes is provided as well as the percentage of all known GSL genes exceeding each threshold.
